# Supplementary material
Source: publisher figshare collection journal article supplement (https://acs.figshare.com/ndownloader/files/27109701)
Supplement: Supplementary file 1 [file 27109701]

## Sheet: Overview
Supplementary Data 3
Full proteome analysis
Tab	Description
Xan treated A. baumannii (wt)	Full proteome analysis of Xan versus DMSO treated A. baumannii (wt)
Xan resistant mutants	Full proteome analysis of Xan resistant colonies (A-3, B-3, C-3) compared to A. baumannii (wt)

## Sheet: Xan resistant mutants
LFQ intensity																Student's T-test Significant Colony A-3/WT	Student's T-test significant	Student's T-test Significant Colony B-3/WT	Student's T-test significant_	Student's T-test Significant Colony C-3/WT	Student's T-test significant__	Peptides	Razor + unique peptides	Unique peptides	Sequence coverage [%]	Unique + razor sequence coverage [%]	Unique sequence coverage [%]	Mol. weight [kDa]	Intensity	MS/MS count	-Log Student's T-test p-value Colony A-3/WT	Student's T-test q-value Colony A-3/WT	Student's T-test Difference Colony A-3/WT	Student's T-test Test statistic Colony A-3/WT	-Log Student's T-test p-value Colony B-3/WT	Student's T-test q-value Colony B-3/WT	Student's T-test Difference Colony B-3/WT	Student's T-test Test statistic Colony B-3/WT	-Log Student's T-test p-value Colony C-3/WT	Student's T-test q-value Colony C-3/WT	Student's T-test Difference Colony C-3/WT	Student's T-test Test statistic Colony C-3/WT	Protein IDs	Fasta headers
Colony A-3	Colony A-3	Colony A-3	Colony A-3	Colony B-3	Colony B-3	Colony B-3	Colony B-3	Colony C-3	Colony C-3	Colony C-3	Colony C-3	WT	WT	WT	WT
28.9921	29.207	28.8196	28.7804	29.2414	29.0088	29.0093	29.1939	28.7006	28.4235	28.8922	29.239	28.8454	29.1024	29.0775	28.9872							7	7	7	66.2	66.2	66.2	8.8371	10178000000	94	0.184125	0.48824	-0.0533571	-0.470746	0.622193	0.144324	0.110232	1.30823	0.474091	0.245459	-0.189278	-1.04645	D0C5H3	Arc domain-containing protein
24.8384	25.1483	23.9372	24.0517	22.0976	24.2621	25.8553	23.8998	24.671	24.2002	24.3665	24.8971	27.1496	27.0352	27.0028	27.1178	+	Colony A-3/WT	+	Colony B-3/WT	+	Colony C-3/WT	7	7	7	65.5	65.5	65.5	13.252	1143200000	32	3.88422	0	-2.58245	-8.66211	2.12176	0.00548216	-3.04762	-3.94799	5.41649	0	-2.54266	-15.9666	D0C5H6	Toxin-antitoxin system, toxin component, Bro domain protein
32.4578	32.5303	32.2481	32.2976	32.5886	32.7815	32.7044	32.6284	32.2458	32.5688	32.3124	32.2595	32.4719	32.7729	32.7445	32.6814	+	Colony A-3/WT			+	Colony C-3/WT	9	9	9	51.8	51.8	51.8	18.809	118320000000	206	1.61536	0.0121341	-0.284241	-2.99236	0.0345583	0.869026	0.00803661	0.10012	1.70927	0.0150371	-0.32108	-3.16136	D0C5H7	DUF4468 domain-containing protein
23.8132	23.4481	24.6676	22.8911	22.981	26.0569	26.4846	25.9524	23.0038	25.9757	24.8843	24.1328	26.6854	25.0533	24.3493	25.3172	+	Colony A-3/WT					6	6	6	8.1	8.1	8.1	172.18	1157400000	9	1.43524	0.0191482	-1.64634	-2.67648	0.00619308	0.977174	0.0174141	0.0184983	0.488637	0.236234	-0.852197	-1.07278	D0C5H8	Putative phage tail tape measure protein, lambda family
24.0079	24.1039	23.0892	23.6215	24.375	24.437	23.9914	23.443	24.5015	24.1602	24.0255	24.5139	24.905	25.1419	24.8683	25.1292	+	Colony A-3/WT	+	Colony B-3/WT	+	Colony C-3/WT	4	4	4	16.8	16.8	16.8	29.364	423630000	37	2.78143	0.00103501	-1.30547	-5.40622	2.12841	0.0054537	-0.949505	-3.96135	2.60381	0.00243956	-0.710816	-4.98472	D0C5H9	Uncharacterized protein
23.716	24.4943	25.2475	23.4427	24.804	24.5996	23.9611	24.3487	24.2349	25.1453	24.4264	24.4804	25.3881	24.5507	24.3725	24.5206							3	3	3	30.8	30.8	30.8	15.306	338010000	25	0.466443	0.202903	-0.482846	-1.03254	0.423967	0.246761	-0.279628	-0.954404	0.174258	0.56372	-0.136234	-0.448569	D0C5I0	Uncharacterized protein
26.5594	26.9636	26.614	26.9407	26.6728	26.4876	26.8898	26.6411	26.5494	26.437	25.5406	26.1251	27.3871	27.7609	27.4448	27.7914	+	Colony A-3/WT	+	Colony B-3/WT	+	Colony C-3/WT	6	6	6	25.6	25.6	25.6	26.329	2438900000	59	2.83584	0.00079375	-0.826634	-5.54014	3.34215	0.000245455	-0.923231	-6.90836	2.91952	0.00169507	-1.43303	-5.75077	D0C5I9	Exonuclease
25.3013	25.485	25.2534	25.3804	25.8341	25.7232	25.8373	25.6553	25.8976	25.3636	25.7789	26.0027	25.6916	25.6446	26.2126	25.6938	+	Colony A-3/WT					5	5	5	23.5	23.5	23.5	42.838	1060600000	73	1.71449	0.00961532	-0.455617	-3.17085	0.127637	0.612227	-0.0481772	-0.340124	0.0939674	0.727706	-0.049983	-0.257442	D0C5J0	Secretory lipase
32.7787	32.7111	32.6036	32.6946	32.7236	32.6303	32.5189	32.74	32.6149	32.7465	32.5789	32.6077	33.1922	33.0244	33.0946	33.2991	+	Colony A-3/WT	+	Colony B-3/WT	+	Colony C-3/WT	24	24	24	67.6	67.6	67.6	44.994	146200000000	594	3.2101	0.000452242	-0.455611	-6.52886	3.15106	0.000325866	-0.499426	-6.36458	3.47859	0.000488136	-0.515579	-7.31897	D0C5J2	Serine hydroxymethyltransferase
27.2515	27.2747	27.0226	27.2783	27.6185	27.4901	27.4912	27.4625	27.1907	27.3688	27.1374	27.1862	27.5197	27.6134	27.5817	27.2322	+	Colony A-3/WT			+	Colony C-3/WT	11	11	11	38	38	38	38.605	3706200000	104	1.40495	0.020703	-0.279943	-2.62429	0.114055	0.642698	0.0288177	0.307257	1.41363	0.0273025	-0.265955	-2.63923	D0C5J7	LysR substrate binding domain protein
23.792	24.0144	25.5116	23.1946	23.6867	24.4167	23.9124	25.4267	23.9554	23.7966	24.0352	23.4638	22.8397	24.8945	23.9576	24.0619							5	5	5	28.7	28.7	28.7	28.47	281840000	44	0.108058	0.643537	0.189743	0.29254	0.311051	0.341784	0.422192	0.737588	0.10512	0.702102	-0.125676	-0.285283	D0C5J8	Lysine/arginine/ornithine ABC transporter, periplasmic lysine/arginine/ornithine-binding protein ArgT
25.8222	26.1678	25.4972	25.037	24.7792	24.534	24.8531	24.7825	24.9093	24.9128	24.8858	25.18	26.7724	27.2202	26.9104	27.0714	+	Colony A-3/WT	+	Colony B-3/WT	+	Colony C-3/WT	5	5	5	73.6	73.6	73.6	9.6211	1243000000	31	2.71619	0.00127721	-1.3626	-5.24867	5.84291	0	-2.25641	-18.8592	5.56418	0	-2.02164	-16.9162	D0C5K3	Ferredoxin
31.0247	31.1268	31.0014	31.0569	31.0919	31.0038	30.8919	31.0028	31.3132	31.4296	31.1147	31.1954	31.8416	31.8545	31.6531	31.6686	+	Colony A-3/WT	+	Colony B-3/WT	+	Colony C-3/WT	21	21	21	55.7	55.7	55.7	54.099	51377000000	452	4.60094	0	-0.702003	-11.5711	4.50592	0	-0.756839	-11.1402	2.86294	0.00172786	-0.49121	-5.60774	D0C5K4	Peptidase, U32 family
26.7068	26.9853	26.9199	26.9336	27.6975	28.0861	27.9036	27.9063	27.1386	26.6898	26.8267	26.6709	27.726	27.261	27.4935	27.5484	+	Colony A-3/WT	+	Colony B-3/WT	+	Colony C-3/WT	12	12	12	63	63	63	31.116	3297400000	83	2.79869	0.00104135	-0.620818	-5.44846	1.69819	0.0127392	0.391168	3.14126	2.46723	0.00277288	-0.675715	-4.67599	D0C5K6	Phenazine biosynthesis protein, PhzF family
31.0499	31.1751	30.9843	30.9662	31.2399	31.1573	31.1485	31.4559	30.8405	31.2266	31.0741	31.3385	31.5856	31.7053	31.6933	31.7061	+	Colony A-3/WT	+	Colony B-3/WT	+	Colony C-3/WT	18	18	18	75.3	75.3	75.3	29.334	50832000000	299	4.54569	0	-0.628681	-11.3187	2.80608	0.00135593	-0.422167	-5.46662	2.58883	0.00250725	-0.55262	-4.95024	D0C5K7	Ferredoxin--NADP(+) reductase
26.5683	26.5475	26.3703	26.1908	26.4523	26.2771	26.6378	26.3786	26.1121	26.6339	26.1869	26.529	26.4623	26.4838	26.0973	26.6996							6	6	6	36.1	36.1	36.1	27.944	1704600000	47	0.0373979	0.853493	-0.0165157	-0.108033	0.0016058	0.992855	0.000705242	0.0048215	0.150385	0.609375	-0.0702825	-0.393835	D0C5K8	Methyltransferase, YaeB family
24.1816	27.9294	27.8476	27.9657	23.9687	23.39	22.1127	24.5831	25.1193	27.3948	23.0776	23.9131	24.8727	25.3891	23.2785	23.7559	+	Colony A-3/WT					2	2	2	29.4	29.4	29.4	12.922	4915800000	10	1.34583	0.0239491	2.65701	2.52307	NaN	1	0	NaN	0.207445	0.506907	0.552171	0.522212	D0C5L1	BOF domain-containing protein
27.3026	27.4976	26.9517	27.1656	27.0728	26.544	27.6968	27.1332	26.3268	25.5736	27.1988	26.605	24.0791	24.4286	27.937	23.9506	+	Colony A-3/WT	+	Colony B-3/WT			2	2	2	9.1	9.1	9.1	25.176	2220300000	20	1.16813	0.0339065	2.13056	2.22318	1.06642	0.0494266	2.01287	2.05356	0.625986	0.163313	1.32723	1.31478	D0C5L2	Putative transcriptional regulatory protein QseB
27.832	27.6555	27.1024	27.6051	27.5881	27.4791	27.3536	27.3116	27.096	27.4625	27.2362	27.4204	27.4189	27.7757	27.6448	27.6228					+	Colony C-3/WT	13	13	13	52.1	52.1	52.1	34.682	3603300000	141	0.147108	0.553329	-0.0668178	-0.386194	0.964838	0.0628507	-0.182452	-1.88479	1.49075	0.0234383	-0.311803	-2.77277	D0C5L5	Mutator mutT protein
29.5608	29.6267	29.6396	29.3899	29.7515	29.4729	29.4297	29.524	29.583	29.7401	29.5693	29.6578	29.2044	29.7424	29.2278	29.3215							14	14	14	73.2	73.2	73.2	20.645	14704000000	176	0.621279	0.130423	0.180208	1.30665	0.549059	0.174031	0.170477	1.18057	1.03738	0.061187	0.263504	2.00528	D0C5L6	Uncharacterized protein
30.8249	30.694	30.7466	30.7485	30.9097	30.8731	30.8416	30.8133	30.9706	31.0064	30.9012	30.9529	30.8556	31.063	30.9399	30.9682	+	Colony A-3/WT	+	Colony B-3/WT			39	39	39	66	66	66	88.222	38177000000	689	2.15817	0.0037121	-0.203229	-4.02143	1.06257	0.0497741	-0.0972733	-2.04716	0.0073981	0.9742	0.00106001	0.0220677	D0C5L7	Penicillin-binding protein 1B
27.9573	28.0281	28.2051	28.2293	28.5816	28.5447	28.4831	28.3808	28.1958	28.3208	28.3116	28.3643	28.5907	28.606	28.5812	28.5403	+	Colony A-3/WT			+	Colony C-3/WT	12	12	12	40.1	40.1	40.1	33.415	6725100000	142	3.36437	0.000498925	-0.474614	-6.97393	0.90117	0.0734968	-0.0820212	-1.77898	3.46728	0.000481605	-0.281437	-7.28417	D0C5L8	NAD kinase
27.8356	28.4638	28.2886	28.0635	27.8064	27.517	28.0994	27.7039	28.0466	27.5409	28.5741	28.3867	28.5907	28.7846	28.4069	29.4697	+	Colony A-3/WT	+	Colony B-3/WT			2	2	2	36.7	36.7	36.7	10.474	6377000000	55	1.28207	0.0265712	-0.650119	-2.4148	2.11545	0.00551376	-1.03129	-3.93533	1.08421	0.0562466	-0.675911	-2.08316	D0C5L9	Uncharacterized protein
28.5365	28.3935	28.2882	28.3445	28.7187	28.4854	28.5051	28.4078	28.6382	28.6645	28.577	28.3775	28.835	29.0109	28.9657	28.6303	+	Colony A-3/WT	+	Colony B-3/WT	+	Colony C-3/WT	14	14	14	54.8	54.8	54.8	38.076	7901700000	169	2.46654	0.00187245	-0.469791	-4.67447	1.65401	0.014	-0.331218	-3.06153	1.48547	0.0236466	-0.296188	-2.76359	D0C5M0	Glycosyl transferase family, helical bundle domain protein
27.9606	28.0729	27.724	27.6005	28.2078	28.0202	27.6394	27.8072	27.8548	28.5787	27.9243	28.3687	28.6965	29.0502	28.9179	28.7685	+	Colony A-3/WT	+	Colony B-3/WT	+	Colony C-3/WT	6	6	6	11.1	11.1	11.1	48.083	6279800000	82	3.57626	0.000367246	-1.01876	-7.62505	3.16252	0.000329897	-0.939608	-6.39622	1.90902	0.00949282	-0.67667	-3.5325	D0C5M1	C4-dicarboxylate transport protein
29.8106	29.7361	29.8341	29.854	29.7442	29.6574	29.5658	29.6896	29.7843	30.0783	29.7588	30.0017	29.2532	29.4887	29.5215	29.5818	+	Colony A-3/WT	+	Colony B-3/WT	+	Colony C-3/WT	19	19	19	69.3	69.3	69.3	42.256	16808000000	285	2.40683	0.00208631	0.347427	4.54345	1.33336	0.0272247	0.202965	2.50184	2.22187	0.00467327	0.444451	4.15169	D0C5M2;D0CE64	Acyl-CoA dehydrogenase, C-terminal domain protein
25.8511	25.9274	26.2009	25.8484	25.8815	26.2281	26.2527	26.1909	26.3016	26.0519	25.8018	26.2549	26.3505	26.0869	26.4173	25.8647							6	6	6	26.4	26.4	26.4	35.688	1429500000	33	0.715289	0.100126	-0.222894	-1.46745	0.0990453	0.677018	-0.0415154	-0.270178	0.176182	0.560327	-0.0772748	-0.452915	D0C5M3	Putative esterase
31.0964	31.0506	31.0532	31.1109	31.247	31.1357	31.1003	31.1244	31.3477	31.4431	31.1333	31.3001	31.3572	31.4011	31.4876	31.3696	+	Colony A-3/WT	+	Colony B-3/WT			18	18	18	64.5	64.5	64.5	41.292	48491000000	359	4.19822	0	-0.326116	-9.84384	2.91677	0.000831541	-0.252041	-5.74376	0.660637	0.149761	-0.0978069	-1.37436	D0C5M4	Chorismate mutase
32.03	31.9202	31.9692	32.0359	31.9956	31.8796	31.9246	31.869	31.9956	31.9345	32.0365	32.133	32.1082	32.2263	32.2084	32.1559	+	Colony A-3/WT	+	Colony B-3/WT	+	Colony C-3/WT	42	42	42	65.9	65.9	65.9	80.602	84312000000	679	2.54779	0.0017396	-0.1859	-4.85654	3.21914	0.000229787	-0.257501	-6.55429	1.63395	0.017649	-0.149824	-3.02557	D0C5M5	3-phosphoshikimate 1-carboxyvinyltransferase
30.3671	30.3649	30.2169	30.3049	30.8981	30.8787	30.5843	30.6913	30.8	30.8229	30.6202	30.7433	30.7139	30.8878	30.7114	30.8185	+	Colony A-3/WT					16	16	16	53.7	53.7	53.7	52.967	32675000000	322	3.82236	0	-0.469441	-8.44458	0.082195	0.719137	-0.0197964	-0.227525	0.234924	0.472307	-0.0363078	-0.581293	D0C5M7	Xaa-His dipeptidase
25.9634	26.0092	25.6143	25.7822	25.4836	25.7974	25.6927	25.8572	25.7978	25.8809	25.8557	25.6387	23.795	25.4484	26.0945	25.8769							8	8	8	40.6	40.6	40.6	35.701	1038700000	38	0.45929	0.206575	0.53859	1.01949	0.325789	0.326072	0.404043	0.766783	0.413805	0.28804	0.489562	0.935468	D0C5M8	Ribonuclease Z
27.8201	27.5887	28.2984	28.3076	27.4898	27.7068	28.0546	28.0233	27.6484	27.2248	27.9979	27.9474	28.15	27.9836	28.177	27.7443							7	7	7	65	65	65	23.901	4811000000	72	0.0165232	0.929434	-0.00999832	-0.0487923	0.539835	0.178532	-0.195083	-1.16426	0.74556	0.121515	-0.309082	-1.51864	D0C5M9	Uncharacterized protein
30.7102	30.829	30.5952	30.6222	30.9612	31.0257	31.0064	30.881	30.6028	30.4942	30.7382	30.7629	30.6026	30.7664	30.9552	30.7127			+	Colony B-3/WT			25	25	25	88	88	88	29.822	34885000000	383	0.32902	0.30758	-0.0700383	-0.773143	1.39337	0.0233734	0.209397	2.6044	0.522979	0.216266	-0.109673	-1.13434	D0C5N0	UPF0246 protein HMPREF0010_00060
29.317	29.4311	29.0132	29.3357	29.6839	29.7536	29.5942	29.6698	29.8447	29.7307	29.8021	29.8351	30.3062	30.3283	30.2164	30.3538	+	Colony A-3/WT	+	Colony B-3/WT	+	Colony C-3/WT	12	12	12	61.3	61.3	61.3	27.763	18898000000	260	4.42163	0	-1.02691	-10.7705	5.10588	0	-0.625782	-14.1331	4.81655	0	-0.498016	-12.6066	D0C5N2	Thiazole synthase
29.0799	29.2634	29.19	29.2588	29.0488	29.1109	29.149	29.1142	29.1223	29.0496	29.0875	29.1979	29.4114	29.2835	29.3535	29.4293	+	Colony A-3/WT	+	Colony B-3/WT	+	Colony C-3/WT	15	15	15	75.7	75.7	75.7	32.85	11768000000	249	1.71668	0.00952962	-0.171389	-3.17483	3.29501	0.000238938	-0.263711	-6.77091	2.85806	0.00172414	-0.255108	-5.59553	D0C5N5	RNA polymerase sigma factor RpoH
25.6466	25.6898	25.2172	25.3065	25.5935	25.8962	25.853	23.4258	26.0555	24.0228	25.8094	25.9183	26.5478	26.3301	26.1979	26.1808	+	Colony A-3/WT					3	3	3	45.7	45.7	45.7	9.3227	1084000000	16	2.94318	0.000643449	-0.849116	-5.81136	0.958637	0.0638233	-1.12203	-1.87449	0.898088	0.0830706	-0.862644	-1.77385	D0C5N6	UPF0033 domain-containing protein
33.2008	33.3697	33.2019	32.9631	32.7165	32.857	33.2017	33.1349	33.0517	32.4525	33.214	32.8449	32.6862	33.0924	33.2119	32.9828							6	6	6	72.9	72.9	72.9	7.8807	168580000000	100	0.651555	0.119621	0.190523	1.35879	0.0339358	0.870107	-0.0158052	-0.0983801	0.204002	0.512135	-0.102571	-0.514695	D0C5N7	Cold shock-like protein CspG
30.4323	30.4663	30.4631	30.4904	30.7881	30.5767	30.602	30.8408	30.4899	30.6091	30.554	30.7413	30.5886	30.7017	30.9113	30.6161	+	Colony A-3/WT					20	20	20	59.5	59.5	59.5	43.588	31514000000	295	1.76434	0.00838859	-0.241401	-3.26202	0.00860507	0.968153	-0.00252438	-0.0256333	0.542916	0.205066	-0.105861	-1.16972	D0C5N8	ATP-dependent RNA helicase RhlB
29.6363	29.9025	29.7034	30.1404	29.8753	29.9067	29.5575	29.557	30.1167	29.6368	29.932	30.1163	29.3603	29.4805	29.3242	29.2736	+	Colony A-3/WT	+	Colony B-3/WT	+	Colony C-3/WT	5	5	5	45.2	45.2	45.2	13.282	17211000000	150	2.14596	0.0037316	0.486	3.99672	1.85735	0.00907924	0.364467	3.43485	2.55056	0.0026831	0.590791	4.86282	D0C5N9	Uncharacterized protein
29.3322	29.3712	29.1605	29.4016	28.8917	28.9777	29.4063	28.9041	29.1481	29.1124	29.053	29.117	29.0448	29.2258	29.3889	29.3408							7	7	7	55.5	55.5	55.5	21.019	11697000000	127	0.296565	0.342249	0.0662999	0.708584	0.690365	0.122258	-0.20514	-1.42512	0.915251	0.0803981	-0.142457	-1.8024	D0C5P0	Putative NAD(P)H nitroreductase
29.9428	29.8469	29.7716	29.8185	29.8947	29.7489	29.7202	29.7916	29.7906	29.7587	30.0069	29.9727	30.0488	30.075	29.8221	29.9403			+	Colony B-3/WT			19	19	19	65	65	65	38.536	19061000000	294	0.949484	0.0550893	-0.126597	-1.85928	1.41382	0.022192	-0.182695	-2.63955	0.47423	0.24551	-0.0893054	-1.0467	D0C5P1	Glycerol-3-phosphate dehydrogenase [NAD(P)+]
29.206	29.2761	29.2096	29.1099	29.0039	28.9469	29.0797	29.054	29.2645	28.652	29.4706	29.3763	29.3703	29.168	29.4221	29.1042			+	Colony B-3/WT			8	8	8	57.6	57.6	57.6	16.779	11693000000	150	0.332909	0.304453	-0.065733	-0.78078	1.60634	0.0155352	-0.245024	-2.9763	0.143046	0.623194	-0.0752959	-0.376681	D0C5P2	Putative phosphohistidine phosphatase SixA
27.9242	28.081	27.9561	27.885	28.1121	27.9673	27.826	27.8443	28.1728	27.8522	28.1638	28.025	28.4342	28.2868	28.5301	28.3275	+	Colony A-3/WT	+	Colony B-3/WT	+	Colony C-3/WT	11	11	11	36.9	36.9	36.9	42.887	5548100000	153	3.10945	0.000511111	-0.433122	-6.25077	2.74686	0.00163754	-0.457234	-5.32234	1.97988	0.008595	-0.341187	-3.66839	D0C5P3	Type II secretion system protein L
25.3641	25.347	25.07	24.7127	24.9856	25.3626	25.4931	25.2187	25.2553	25.1533	25.344	25.3652	25.3115	24.8433	25.1195	25.3256							2	2	2	21.4	21.4	21.4	18.298	733410000	22	0.0489946	0.817608	-0.0265236	-0.139901	0.309877	0.342887	0.115025	0.735249	0.480192	0.241685	0.129493	1.05751	D0C5P4	Uncharacterized protein
29.9952	29.9341	29.7751	29.7287	29.6779	29.8762	29.9035	29.6332	29.8886	29.8036	29.7453	30.003	30.7541	30.8092	30.7521	30.7378	+	Colony A-3/WT	+	Colony B-3/WT	+	Colony C-3/WT	20	20	20	69.2	69.2	69.2	36.092	22704000000	331	5.0558	0	-0.905031	-13.857	5.09935	0	-0.990597	-14.0968	5.3457	0	-0.903175	-15.5297	D0C5P5	Dihydroorotate dehydrogenase (quinone)
24.8897	25.1235	25.0964	25.1385	25.0836	25.6813	25.3098	24.625	25.2591	25.2365	25.0348	24.4713	25.4188	26.0086	25.6251	25.7685	+	Colony A-3/WT	+	Colony B-3/WT	+	Colony C-3/WT	2	2	2	19.9	19.9	19.9	19.074	806200000	42	2.47663	0.00188932	-0.643223	-4.69684	1.09049	0.046	-0.530314	-2.09362	1.72117	0.0147222	-0.704785	-3.18301	D0C5P6	CvpA family protein
31.6098	31.5766	31.5674	31.5786	31.6577	31.721	31.6409	31.6632	31.6678	31.8342	31.7151	31.8073	32.3366	32.5086	32.559	32.5306	+	Colony A-3/WT	+	Colony B-3/WT	+	Colony C-3/WT	28	28	28	72.9	72.9	72.9	57.028	79122000000	517	5.67673	0	-0.900582	-17.6763	5.31188	0	-0.812981	-15.3251	4.57792	0	-0.72758	-11.4653	D0C5P7	Amidophosphoribosyltransferase
25.2343	23.1548	23.9431	23.7622	24.9392	24.5964	24.4594	23.9337	24.6107	24.6043	23.9207	24.2328	24.596	25.0309	24.0501	24.6813							6	6	6	10.6	10.6	10.6	72.503	234150000	11	0.545209	0.16124	-0.565959	-1.17377	0.139705	0.587416	-0.107398	-0.368819	0.418321	0.284919	-0.24745	-0.943896	D0C5P8	Peptidase_M48 domain-containing protein
24.9816	25.3063	25.4302	25.0397	25.1007	24.8754	25.0693	25.0909	25.2619	24.8106	25.1791	25.1037	25.2708	25.6994	26.3206	25.6723	+	Colony A-3/WT	+	Colony B-3/WT	+	Colony C-3/WT	7	7	7	43.5	43.5	43.5	24.727	790840000	38	1.20302	0.0314254	-0.551337	-2.28165	1.7124	0.0124829	-0.706708	-3.16705	1.4722	0.0241828	-0.651969	-2.7405	D0C5P9	Uncharacterized protein
30.702	30.702	30.773	30.7067	30.2687	30.3048	30.1806	30.3009	30.6969	30.6834	30.5309	30.5936	30.9028	30.8879	30.9387	30.7991	+	Colony A-3/WT	+	Colony B-3/WT	+	Colony C-3/WT	22	22	22	80.7	80.7	80.7	35.792	32188000000	445	2.47281	0.00188447	-0.161239	-4.68836	5.24614	0	-0.618393	-14.9346	2.69881	0.00257143	-0.255916	-5.20725	D0C5Q0	Glyoxylate/hydroxypyruvate reductase B
27.7223	27.6915	27.4532	27.6813	27.6917	27.7316	27.7819	27.4216	27.6589	27.4209	27.6989	27.5816	27.6258	27.8706	27.8446	27.7056							12	12	12	41	41	41	53.253	4078500000	177	0.715972	0.100107	-0.124573	-1.46861	0.480182	0.211433	-0.104942	-1.05749	1.05278	0.0597679	-0.171583	-2.03088	D0C5Q1	Putative beta-barrel assembly-enhancing protease
30.9822	30.983	30.6837	30.6503	29.7115	29.9841	30.3469	30.1224	30.537	29.7049	30.2853	30.3122	30.4955	30.7012	30.6132	30.6834	+	Colony A-3/WT	+	Colony B-3/WT	+	Colony C-3/WT	7	7	7	66	66	66	16.773	28626000000	120	1.01239	0.0478137	0.201452	1.96376	2.2126	0.00474251	-0.582118	-4.1326	1.1859	0.0446656	-0.413497	-2.25294	D0C5Q2	YqeY-like protein
31.9484	31.4453	31.7963	31.7938	31.7942	31.8987	31.9073	31.5067	32.2034	31.9072	32.3154	32.2463	32.431	32.4937	32.2707	32.2645	+	Colony A-3/WT	+	Colony B-3/WT			8	8	8	46.5	46.5	46.5	8.4509	85324000000	162	2.65754	0.001433	-0.619022	-5.10977	2.75833	0.00148534	-0.588218	-5.35007	0.939314	0.0770787	-0.196891	-1.84239	D0C5Q3	30S ribosomal protein S21
29.6084	29.5563	29.5151	29.572	29.8128	29.7052	29.7702	29.6007	29.7038	29.6562	29.7887	29.7713	29.7548	29.769	30.0197	29.9662	+	Colony A-3/WT					18	18	18	61	61	61	36.103	17165000000	275	2.37268	0.0024593	-0.314459	-4.46953	0.971226	0.0616005	-0.155213	-1.8954	1.02514	0.0629285	-0.147434	-1.98494	D0C5Q4	tRNA N6-adenosine threonylcarbamoyltransferase
29.5071	29.5429	29.4095	29.5008	29.5936	29.563	29.5648	29.4473	29.6055	29.6397	29.6848	29.61	29.5472	29.6402	29.8127	29.7794	+	Colony A-3/WT	+	Colony B-3/WT			15	15	15	61.4	61.4	61.4	33.804	15465000000	205	1.62577	0.011973	-0.204766	-3.01095	1.14764	0.0397239	-0.152693	-2.18892	0.410134	0.28945	-0.0598278	-0.928603	D0C5Q6	DUF815 domain-containing protein
28.4455	28.3953	28.2415	28.2367	28.4862	28.5304	28.2423	28.1427	28.5645	28.8276	28.5464	28.6876	28.7203	28.7475	28.9178	28.743	+	Colony A-3/WT	+	Colony B-3/WT			18	18	18	39	39	39	57.723	7563600000	224	3.18059	0.000448743	-0.452345	-6.44635	2.21498	0.0047482	-0.431701	-4.13749	0.782347	0.111097	-0.125592	-1.58055	D0C5Q7	Phospholipase, patatin family
23.7437	24.3647	24.6566	23.6935	23.4303	23.8758	23.4269	23.5498	23.4623	23.4681	23.5914	23.5018	25.25	23.7047	24.0449	24.1384					+	Colony C-3/WT	3	3	3	13.7	13.7	13.7	32.73	208650000	33	0.159245	0.529329	-0.169914	-0.414333	1.05341	0.0505605	-0.7138	-2.03192	1.22282	0.0406149	-0.778627	-2.3149	D0C5Q8	Protein kinase domain-containing protein
25.211	25.004	25.3309	24.5311	25.2399	25.0884	25.2903	25.0097	25.1782	24.8816	25.2711	25.4465	24.7324	24.8769	24.9109	24.8866			+	Colony B-3/WT	+	Colony C-3/WT	7	7	7	22.3	22.3	22.3	34.638	680510000	38	0.409238	0.237852	0.16755	0.926926	2.13736	0.00542657	0.305357	3.97935	1.47393	0.0240598	0.342612	2.74352	D0C5Q9	Transcriptional regulator, LysR family
27.4349	27.4125	27.3654	27.4366	27.8388	27.7432	27.5873	27.7238	27.6429	27.5355	27.7114	27.624	27.8693	27.9701	27.8283	27.7129	+	Colony A-3/WT			+	Colony C-3/WT	14	14	14	47.3	47.3	47.3	57.178	4083700000	187	3.62024	0.00038342	-0.432819	-7.76634	0.818333	0.0884414	-0.12188	-1.64085	1.82095	0.0117585	-0.216711	-3.36678	D0C5R1	Methylmalonate-semialdehyde dehydrogenase (Acylating)
33.2296	33.9444	33.8339	34.1424	32.9918	33.497	33.5761	33.1864	34.4165	33.9555	34.2398	33.8272	30.633	30.9305	30.7887	31.0676	+	Colony A-3/WT	+	Colony B-3/WT	+	Colony C-3/WT	11	11	11	84.4	84.4	84.4	8.7186	221600000000	256	4.98469	0	2.93262	13.4736	5.23894	0	2.45787	14.8925	5.98828	0	3.25481	19.9567	D0C5R3	Uncharacterized protein
27.2408	27.2752	27.7683	27.6465	28.7532	28.5834	28.4902	28.7808	29.1876	28.8517	28.5806	28.4941	25.1108	24.8558	25.3822	24.5414	+	Colony A-3/WT	+	Colony B-3/WT	+	Colony C-3/WT	11	11	11	46.3	46.3	46.3	37.84	5265200000	139	4.53258	0	2.51018	11.2596	5.87885	0	3.67941	19.1249	5.42157	0	3.80601	15.9983	D0C5R4	Uncharacterized protein
26.4945	26.4986	26.7882	26.6147	27.239	27.4318	27.3843	27.0792	27.8704	28.1837	27.4462	27.7091	24.5286	23.5849	26.5766	25.3493	+	Colony A-3/WT	+	Colony B-3/WT	+	Colony C-3/WT	7	7	7	37.1	37.1	37.1	29.557	2612900000	45	1.32623	0.0247033	1.58916	2.48969	1.92103	0.00787177	2.27375	3.55536	2.28166	0.00421861	2.79248	4.27609	D0C5R5	N-acetylglucosaminylphosphatidylinositol deacetylase
25.966	26.0712	25.9411	26.3973	26.5706	26.3586	26.4058	26.5551	26.486	26.074	26.6479	26.5115	24.1079	24.3554	24.6465	25.8356	+	Colony A-3/WT	+	Colony B-3/WT	+	Colony C-3/WT	4	4	4	24.1	24.1	24.1	23.68	1217900000	53	1.85037	0.00748052	1.35756	3.42176	2.38437	0.00374142	1.73619	4.49475	2.25064	0.0045245	1.69351	4.21129	D0C5R6	Methyltransferase domain protein
27.4067	27.4192	27.9751	27.9961	29.4614	28.6839	28.5067	28.997	28.5145	29.2662	29.0156	27.8478	27.3359	27.3534	26.4317	27.0032	+	Colony A-3/WT	+	Colony B-3/WT	+	Colony C-3/WT	4	4	4	47.5	47.5	47.5	13.042	6369100000	71	1.30919	0.0250773	0.668233	2.46076	3.11456	0.000484127	1.88118	6.26467	2.28877	0.00425	1.62996	4.291	D0C5R8	BOF domain-containing protein
27.9987	27.7301	27.9038	28.3998	27.279	27.8275	27.7929	27.863	28.2728	28.2399	28.0362	27.9153	28.2454	27.5858	28.0022	27.5184							3	3	3	16.3	16.3	16.3	43.746	5027500000	85	0.32276	0.314381	0.170169	0.760809	0.275663	0.380864	-0.147337	-0.666158	0.701417	0.136312	0.278129	1.44391	D0C5S4	Sodium/glutamate symporter
25.6079	25.3464	25.6916	25.3096	25.5071	25.9888	26.1189	25.8286	25.8923	25.3019	25.3497	25.5172	26.4364	26.3733	26.4844	26.2758	+	Colony A-3/WT	+	Colony B-3/WT	+	Colony C-3/WT	9	9	9	37.3	37.3	37.3	34.074	1190300000	62	3.87032	0	-0.903558	-8.6128	2.05299	0.00606452	-0.531619	-3.81119	3.09447	0.000972152	-0.877184	-6.21019	D0C5S5	DUF815 domain-containing protein
25.5958	25.5796	25.7582	25.653	26.0366	26.0079	25.7098	25.9042	25.7203	25.456	25.8719	25.8611	26.0998	26.3849	26.3496	26.0136	+	Colony A-3/WT	+	Colony B-3/WT	+	Colony C-3/WT	7	7	7	46.6	46.6	46.6	26.512	1229500000	50	2.87795	0.00081672	-0.565352	-5.64542	1.34696	0.0263323	-0.297361	-2.525	1.96302	0.00868796	-0.484676	-3.63585	D0C5S6	Transcriptional regulator, GntR family
31.195	30.9954	30.7747	30.7983	31.3868	31.3221	31.3079	31.1529	30.9981	31.2548	30.9279	30.9726	29.8043	30.1404	30.0316	29.8192	+	Colony A-3/WT	+	Colony B-3/WT	+	Colony C-3/WT	12	12	12	49.1	49.1	49.1	24.821	37051000000	147	3.61443	0.000378517	0.991989	7.74757	5.07906	0	1.34354	13.9846	4.20451	0.000284024	1.08948	9.86891	D0C5S8	Transcriptional regulator, TetR family
35.6796	35.4994	35.3932	35.443	35.5967	35.6751	35.2911	35.5425	35.4123	35.5312	35.034	35.5811	33.8554	33.8917	33.6317	34.0095	+	Colony A-3/WT	+	Colony B-3/WT	+	Colony C-3/WT	10	10	10	79.4	79.4	79.4	18.705	856880000000	953	5.49336	0	1.65677	16.4543	5.19878	0	1.67932	14.6593	4.36062	0	1.54262	10.5099	D0C5S9	Spore Coat Protein U domain protein
31.0047	30.9573	30.7032	30.8649	30.5477	30.5524	30.2573	30.7128	30.1875	30.5709	30.023	30.3389	28.6987	28.8619	28.8951	28.8206	+	Colony A-3/WT	+	Colony B-3/WT	+	Colony C-3/WT	9	9	9	75	75	75	20.787	24340000000	245	6.67921	0	2.06348	26.0866	5.47143	0	1.69851	16.3137	4.64447	0	1.46105	11.7735	D0C5T0	SCPU domain-containing protein
29.651	29.5392	29.2383	29.5827	29.6316	29.7298	29.5699	29.6161	29.3468	30.0326	29.4986	29.9094	27.6598	27.8243	27.7489	27.4275	+	Colony A-3/WT	+	Colony B-3/WT	+	Colony C-3/WT	8	8	8	65.7	65.7	65.7	19.34	12507000000	125	5.19935	0	1.83765	14.6626	6.16098	0	1.97173	21.3416	4.47677	0	2.03175	11.0111	D0C5T1	Spore Coat Protein U domain protein
34.666	34.6661	34.5338	34.4625	34.3832	34.3453	34.2686	34.3398	34.2406	34.4028	34.2724	34.4492	32.5246	32.6231	32.6547	32.7174	+	Colony A-3/WT	+	Colony B-3/WT	+	Colony C-3/WT	22	22	22	66.4	66.4	66.4	30.643	350590000000	492	7.05842	0	1.95213	30.2024	7.54459	0	1.70427	36.43	6.72844	0	1.71131	26.588	D0C5T2	Protein CsuC
32.3559	32.1663	32.1725	32.3484	32.466	32.544	32.2965	32.3411	32.3886	32.6861	32.243	32.4798	30.4753	30.697	30.5409	30.6244	+	Colony A-3/WT	+	Colony B-3/WT	+	Colony C-3/WT	45	45	45	66.8	66.8	66.8	92.669	88574000000	846	6.39983	0	1.67636	23.4128	6.51703	0	1.82751	24.5	5.6986	0	1.86498	17.8277	D0C5T3	Fimbrial usher protein
30.2058	30.203	30.1506	30.3588	30.0955	30.1741	29.6604	30.213	30.4648	30.8263	29.9788	30.414	28.5525	28.3648	28.2731	28.433	+	Colony A-3/WT	+	Colony B-3/WT	+	Colony C-3/WT	10	10	10	38.2	38.2	38.2	37.34	19623000000	227	6.53167	0	1.82372	24.6392	4.60878	0	1.62991	11.6073	4.47244	0	2.01513	10.992	D0C5T4	Protein CsuE
25.0081	25.0735	24.7056	24.0986	25.4887	25.1116	25.7047	24.8875	25.4398	25.1116	25.3336	25.6001	24.7931	25.1025	24.8192	25.0755					+	Colony C-3/WT	3	3	3	16.5	16.5	16.5	23.58	705030000	37	0.423501	0.227957	-0.226146	-0.953537	0.879217	0.077469	0.350561	1.74244	1.74626	0.0137555	0.42371	3.22885	D0C5T7	Hydrolase, NUDIX family
25.9143	26.0026	25.4529	25.8269	26.2468	26.3364	26.5382	26.0143	26.2346	25.9005	25.9031	25.8313	26.2413	26.1149	26.1215	25.8314							9	9	9	74	74	74	19.523	1357500000	88	0.954547	0.0542071	-0.278075	-1.86769	0.726003	0.112329	0.206662	1.4856	0.381759	0.312405	-0.109884	-0.875075	D0C5T9	N-acetyltransferase domain-containing protein
28.8299	28.7503	28.769	28.9408	28.8867	28.8459	28.8933	28.6235	29.0712	29.1636	29.0669	29.0095	28.3884	28.5759	28.6999	28.6755	+	Colony A-3/WT	+	Colony B-3/WT	+	Colony C-3/WT	22	22	22	48.9	48.9	48.9	62.505	9100500000	302	1.5457	0.01471	0.237556	2.869	1.26504	0.0311759	0.22742	2.38602	3.14517	0.000742706	0.492881	6.34839	D0C5U4	Uncharacterized protein
28.3802	28.559	28.1878	28.1206	28.1046	27.9507	28.0479	28.1024	28.2876	28.6789	28.3707	28.4206	27.9707	28.2539	28.0915	28.1824					+	Colony C-3/WT	8	8	8	38.7	38.7	38.7	26.367	6091400000	84	0.799371	0.0811002	0.187266	1.6091	0.466157	0.219559	-0.0732193	-1.03202	1.63145	0.0176382	0.314811	3.0211	D0C5U5	ABC_trans_aux domain-containing protein
25.3878	25.3128	25.2957	25.3112	25.5864	23.3769	24.1029	24.9088	25.6055	24.454	25.1893	25.6348	22.8616	24.5243	24.4359	22.9803	+	Colony A-3/WT			+	Colony C-3/WT	4	4	4	39.8	39.8	39.8	15.088	535560000	27	1.94516	0.00628128	1.62636	3.60151	NaN	1	0	NaN	1.55047	0.0210214	1.52038	2.87739	D0C5U6	5-hydroxyisourate hydrolase
25.3203	25.5509	25.5559	24.1712	24.9747	25.4197	25.3474	23.5148	25.4246	25.6884	25.5803	25.2103	25.3754	25.3953	25.4667	25.5205							8	8	8	40.8	40.8	40.8	26.558	822640000	25	0.380229	0.263051	-0.289895	-0.872164	0.67834	0.125718	-0.625332	-1.40462	0.125123	0.657059	0.0364127	0.334088	D0C5U8	Transcriptional activator protein Irlr
24.1067	24.1685	24.2421	24.2494	24.3647	23.4024	24.1191	24.1231	24.1948	23.7725	24.2215	23.925	24.5294	24.296	24.0981	23.6201							7	7	7	24.8	24.8	24.8	53.982	297610000	32	0.104754	0.651433	0.0557742	0.284379	0.184002	0.508909	-0.133585	-0.470471	0.190468	0.535996	-0.107434	-0.484875	D0C5U9	Sensor protein
24.5003	24.2075	24.6143	24.1562	24.6501	24.318	24.6071	24.445	24.0489	23.775	24.7978	23.2714	24.6556	23.6908	23.7459	23.3532			+	Colony B-3/WT			6	6	6	31.6	31.6	31.6	20.78	362560000	42	0.850043	0.0707391	0.508178	1.69382	1.17112	0.0381004	0.64368	2.22818	0.0967448	0.721959	0.111895	0.26442	D0C5V0	Outer membrane lipoprotein Blc
25.347	25.4067	24.6739	25.4036	25.7472	25.231	25.5339	25.2647	26.0742	25.5691	25.9365	26.2475	25.7281	25.6886	25.743	25.8243	+	Colony A-3/WT	+	Colony B-3/WT			8	8	8	27.9	27.9	27.9	41.059	1001700000	57	1.60713	0.01256	-0.538243	-2.9777	1.28279	0.0301906	-0.301833	-2.41601	0.696361	0.137676	0.210781	1.43532	D0C5V6	Methyltransferase domain protein
24.6096	24.5283	24.3875	24.2945	24.4385	24.2642	24.7195	24.463	24.3913	24.2653	24.3788	24.616	24.6417	24.591	24.5852	24.8171	+	Colony A-3/WT			+	Colony C-3/WT	4	4	4	15.6	15.6	15.6	50.499	428610000	27	1.20848	0.0312755	-0.203782	-2.2908	0.871423	0.0793571	-0.187462	-1.72946	1.44495	0.0256538	-0.245899	-2.69326	D0C5V7	Histidine kinase
25.6606	25.6726	25.7542	25.6512	25.5959	24.4913	25.2483	25.7387	25.6271	25.489	25.2473	26.0736	25.6905	25.8698	25.9195	26.0906	+	Colony A-3/WT	+	Colony B-3/WT			5	5	5	29.9	29.9	29.9	26.251	988340000	28	1.29041	0.0260915	-0.207961	-2.42892	1.12249	0.0422402	-0.624074	-2.14694	0.71991	0.129635	-0.28335	-1.47528	D0C5V8	Response regulator receiver domain protein
26.9545	27.1953	26.9939	27.2475	28.2917	28.2131	28.3015	28.3669	28.1724	27.9745	27.7893	27.8519	28.5297	28.339	28.654	28.6664	+	Colony A-3/WT	+	Colony B-3/WT	+	Colony C-3/WT	11	11	11	60.7	60.7	60.7	26.54	5547400000	130	5.04399	0	-1.44949	-13.7926	1.66864	0.0137303	-0.254005	-3.08786	2.73189	0.00233466	-0.60027	-5.2863	D0C5W2	Aspartate racemase
30.0096	29.9795	29.793	29.9892	30.2145	30.2535	30.0919	29.8788	30.4509	30.6727	30.344	30.4391	29.6892	29.6764	29.7034	29.6186	+	Colony A-3/WT	+	Colony B-3/WT	+	Colony C-3/WT	14	14	14	52.3	52.3	52.3	49.501	21796000000	306	2.63144	0.00149162	0.270915	5.04878	2.64103	0.00186544	0.437803	5.07113	4.51328	0	0.804775	11.1731	D0C5W4	L-sorbosone dehydrogenase
27.586	27.6288	27.3524	27.5068	27.1786	26.9537	27.2649	27.0385	26.9747	26.908	27.3819	27.1613	27.6181	27.4155	27.4793	27.4136			+	Colony B-3/WT	+	Colony C-3/WT	8	8	8	62	62	62	17.825	3175400000	109	0.186414	0.483967	0.0368814	0.475856	2.3429	0.00379897	-0.372668	-4.40569	1.73965	0.0140152	-0.375158	-3.21675	D0C5W5	Acetyltransferase, GNAT family
25.1401	24.7594	25.0703	24.8044	25.3945	24.6972	23.2815	25.1061	24.1865	24.4333	23.7967	24.5637	25.2857	25.5294	24.2734	25.0349					+	Colony C-3/WT	4	4	4	30.9	30.9	30.9	21.587	538670000	17	0.112397	0.631876	-0.087316	-0.303201	0.321727	0.329986	-0.411009	-0.758768	1.30622	0.0337285	-0.785786	-2.45571	D0C5W7	Transcriptional regulator, TetR family
25.2003	25.2621	24.8177	25.0127	24.9354	24.76	24.9848	24.7313	25.491	26.1489	25.7573	25.6591	25.5279	26.3179	26.156	26.0571	+	Colony A-3/WT	+	Colony B-3/WT			3	3	3	9.7	9.7	9.7	46.277	936870000	34	2.50056	0.00174707	-0.941515	-4.75016	3.15573	0.000327869	-1.16185	-6.37747	0.523767	0.21595	-0.250634	-1.13574	D0C5W8	C4-dicarboxylate transport protein
29.3572	29.491	29.3522	29.2174	29.0379	29.3708	29.2677	29.0016	29.3698	28.982	29.3786	29.1012	29.2286	29.4018	29.4152	29.3212							7	7	7	38.7	38.7	38.7	27.753	12368000000	127	0.0642145	0.766008	0.0127406	0.1807	0.876072	0.0781521	-0.172207	-1.73721	0.582186	0.183082	-0.133809	-1.23873	D0C5X0	Hydroxyacylglutathione hydrolase
26.8576	27.2265	27.5086	27.323	26.8209	26.9509	26.9373	27.0536	27.2868	27.8741	27.4285	26.4605	27.6665	27.8493	27.3135	27.7786	+	Colony A-3/WT	+	Colony B-3/WT			2	2	2	16	16	16	25.332	3209300000	50	1.23337	0.029747	-0.423051	-2.33264	2.84077	0.00109217	-0.711276	-5.55242	0.5737	0.186891	-0.38946	-1.22389	D0C5X1	ABC transporter, permease protein
29.8072	29.8272	29.8484	29.8323	29.5329	29.3668	29.4796	29.5013	29.7413	29.7237	29.8269	29.9239	29.9541	30.0668	29.9603	30.0013	+	Colony A-3/WT	+	Colony B-3/WT	+	Colony C-3/WT	14	14	14	58.1	58.1	58.1	38.605	17807000000	260	3.059	0.000491103	-0.166832	-6.11487	4.65289	0	-0.525476	-11.8131	1.96237	0.0086773	-0.191653	-3.63459	D0C5X2	Methionine import ATP-binding protein MetN
31.5794	31.5513	31.4351	31.4296	31.4285	31.3738	31.4426	31.5399	31.6215	31.3984	31.5387	31.6207	31.6086	31.6697	31.8833	31.7122	+	Colony A-3/WT	+	Colony B-3/WT	+	Colony C-3/WT	21	21	21	78	78	78	32.805	60452000000	455	1.68186	0.0109044	-0.219616	-3.1117	2.13977	0.00543925	-0.272237	-3.98423	1.15376	0.0479653	-0.173628	-2.19914	D0C5X3	Lipoprotein
32.3106	32.2881	32.1383	32.1559	32.1006	32.2074	31.9561	32.102	32.1029	32.2294	32.0532	32.2582	32.6958	32.6247	32.759	32.7225	+	Colony A-3/WT	+	Colony B-3/WT	+	Colony C-3/WT	25	25	25	79.4	79.4	79.4	45.599	106900000000	510	3.99528	0	-0.477265	-9.06488	4.31989	0	-0.608983	-10.3391	4.10786	0.000269663	-0.539584	-9.48992	D0C5X4	Phosphoribosylamine--glycine ligase
32.4669	32.3041	32.3612	32.4331	32.3815	32.3607	32.3794	32.3379	32.469	32.4019	32.4735	32.5514	32.8633	33.0716	32.9215	32.9156	+	Colony A-3/WT	+	Colony B-3/WT	+	Colony C-3/WT	33	33	33	75.4	75.4	75.4	56.052	122810000000	650	4.12302	0	-0.551696	-9.54851	4.8124	0	-0.57814	-12.5859	3.88011	0.000215247	-0.469047	-8.64748	D0C5X5	Bifunctional purine biosynthesis protein PurH
28.5043	29.0078	29.2001	28.7171	27.615	27.8215	28.5956	27.9236	28.304	27.2931	28.4898	27.7813	29.127	29.0395	29.248	29.5747	+	Colony A-3/WT	+	Colony B-3/WT	+	Colony C-3/WT	3	3	3	53.9	53.9	53.9	10.054	8151800000	108	1.04366	0.0446938	-0.390007	-2.01571	2.69218	0.001775	-1.25837	-5.19151	2.3159	0.00393912	-1.28029	-4.34827	D0C5X6	DNA-binding protein Fis
26.1872	25.7477	25.6923	25.4798	25.9686	25.7463	26.0745	25.6092	25.9218	25.5169	24.0046	25.8497	26.0758	26.0983	26.1478	26.0256	+	Colony A-3/WT	+	Colony B-3/WT			5	5	5	23.6	23.6	23.6	32.215	1109700000	61	1.0695	0.0421777	-0.310142	-2.05869	1.14762	0.039696	-0.237197	-2.1889	0.854132	0.0927419	-0.763611	-1.70064	D0C5X7	MJ0042 family finger-like domain protein
30.4863	30.4937	30.5531	30.4799	30.4425	30.4693	30.6075	30.6258	30.358	30.1197	30.4485	30.2435	30.9338	30.9314	30.8997	31.0192	+	Colony A-3/WT	+	Colony B-3/WT	+	Colony C-3/WT	11	11	11	63.1	63.1	63.1	33.593	31144000000	269	5.16185	0	-0.442763	-14.448	3.59038	0.000170213	-0.409708	-7.67019	3.87654	0.000214286	-0.653575	-8.63483	D0C5X8	Ribosomal protein L11 methyltransferase
26.9932	26.7362	26.8458	27.0296	26.2039	23.9382	27.0874	25.8649	27.822	26.9497	27.2972	27.1247	27.4786	23.7542	26.4383	26.5646							3	3	3	46.1	46.1	46.1	8.3465	2411500000	58	0.473788	0.198152	0.842259	1.0459	0.100578	0.673226	-0.285356	-0.274003	0.73674	0.124614	1.23947	1.50375	D0C5X9	Uncharacterized protein
31.0318	30.9121	31.0126	30.9671	31.0788	31.1597	31.0447	31.0619	30.7468	31.0268	30.9047	31.076	30.9788	31.1369	31.0394	31.0102							31	31	31	62	62	62	69.071	41024000000	442	0.672386	0.112739	-0.0604444	-1.39446	0.478341	0.212534	0.0449142	1.05416	0.59997	0.175292	-0.102776	-1.26972	D0C5Y0	tRNA uridine 5-carboxymethylaminomethyl modification enzyme MnmG
28.9367	29.0813	29.1612	29.0655	29.0349	29.1274	29.021	29.0362	29.182	29.2032	29.0241	29.0696	28.973	28.8046	28.9998	29.1239							14	14	14	60.3	60.3	60.3	38.623	10753000000	261	0.485257	0.191258	0.0858455	1.06667	0.523242	0.186754	0.0795484	1.1348	0.934812	0.0777491	0.144415	1.83491	D0C5Y1	Malonate decarboxylase, epsilon subunit
26.1014	24.7813	26.5861	26.1566	26.9791	26.9616	27.2141	26.9053	27.2192	27.0903	26.7669	27.0301	27.1323	26.734	27.0394	27.257	+	Colony A-3/WT					14	14	14	47.9	47.9	47.9	58.25	2340800000	133	1.50306	0.0159038	-1.13434	-2.79425	0.0701246	0.756487	-0.0256538	-0.196248	0.033034	0.890002	-0.0140514	-0.0958547	D0C5Y2	Uncharacterized protein
24.8715	24.6631	24.92	25.9105	25.8873	25.4196	25.6115	25.4383	25.2514	25.6619	25.2661	25.4851	25.4798	25.7974	25.4911	25.6069							5	5	5	31.3	31.3	31.3	22.95	816920000	41	0.879654	0.066134	-0.502524	-1.74317	0.0118113	0.956405	-0.00459433	-0.035059	0.705298	0.134793	-0.177647	-1.45051	D0C5Y3	Alpha-E domain-containing protein
28.3232	28.5475	28.1737	28.1211	28.4652	28.4555	28.5544	28.1872	28.35	28.5466	28.3689	28.3452	28.0231	28.0183	28.0968	28.016	+	Colony A-3/WT	+	Colony B-3/WT	+	Colony C-3/WT	11	11	11	61.5	61.5	61.5	27.34	6294100000	179	1.38726	0.0217717	0.252807	2.59391	2.44029	0.00319126	0.377048	4.61659	3.37155	0.00045283	0.364114	6.99521	D0C5Y5	Peptidase, T1 family
25.2799	24.1666	24.2501	24.7368	22.9892	23.0053	24.7418	24.5356	22.9257	25.4059	24.8608	24.2258	25.7776	25.6325	25.3453	26.3789	+	Colony A-3/WT	+	Colony B-3/WT	+	Colony C-3/WT	5	5	5	20.2	20.2	20.2	39.579	617920000	10	1.8869	0.00707838	-1.17522	-3.49053	2.02525	0.00633589	-1.96556	-3.7567	1.31963	0.0326101	-1.429	-2.47848	D0C5Y6	Alanine racemase
29.375	29.3297	29.237	29.2159	29.2001	29.2404	29.2595	29.1269	29.2671	29.4206	29.1256	29.35	29.8513	29.9739	29.8574	29.9137	+	Colony A-3/WT	+	Colony B-3/WT	+	Colony C-3/WT	22	22	22	66.1	66.1	66.1	53.51	14014000000	296	4.86875	0	-0.609675	-12.87	5.55893	0	-0.692331	-16.8815	3.90718	0.000219178	-0.608245	-8.74407	D0C5Y7	Replicative DNA helicase
34.1387	34.3717	34.3691	34.2595	34.2211	34.1201	34.1593	34.5676	34.2742	33.9647	34.1214	34.4268	34.4285	34.4299	34.2875	34.4757							15	15	15	70.3	70.3	70.3	15.781	404880000000	731	0.887794	0.0647682	-0.120674	-1.75672	0.592319	0.156471	-0.138405	-1.25641	0.999648	0.066245	-0.208641	-1.9426	D0C5Y8	50S ribosomal protein L9
32.5924	32.6037	32.7187	32.5955	32.93	32.9767	32.9103	33.125	32.876	32.9302	32.7721	33.176	32.4478	33.0155	32.6771	33.0324							4	4	4	49.3	49.3	49.3	8.9923	151100000000	190	0.529613	0.168309	-0.165633	-1.14614	0.610146	0.149467	0.192296	1.28738	0.384279	0.311042	0.145363	0.879864	D0C5Y9	30S ribosomal protein S18
33.457	33.4511	33.5283	33.4165	33.5865	33.3411	33.3088	33.5918	33.3765	33.3968	33.443	33.6272	33.5525	33.5098	33.3219	33.2481							12	12	12	81.9	81.9	81.9	14.963	223310000000	272	0.301186	0.337753	0.05515	0.717872	0.18043	0.513606	0.048974	0.462472	0.228841	0.480086	0.0527706	0.568351	D0C5Z0	30S ribosomal protein S6
31.124	31.1368	31.1603	31.3483	31.1234	31.3742	31.175	30.8942	31.1774	31.7376	31.0975	30.8262	31.2611	31.8339	31.444	31.3331	+	Colony A-3/WT					12	12	12	18.3	18.3	18.3	74.541	50829000000	263	1.03267	0.0455551	-0.275652	-1.99745	1.04808	0.0513963	-0.326316	-2.02306	0.516781	0.219465	-0.258363	-1.12329	D0C5Z4	Cytochrome o ubiquinol oxidase, subunit I
32.3075	32.1706	32.1555	32.3039	32.3239	32.3386	32.1697	32.1189	32.3254	32.8255	32.1224	32.1913	32.4323	32.6879	32.3693	32.4885	+	Colony A-3/WT	+	Colony B-3/WT			13	13	13	36.6	36.6	36.6	38.905	103990000000	335	1.75169	0.00868917	-0.260161	-3.23879	1.56968	0.0168725	-0.256749	-2.91129	0.313045	0.378598	-0.128374	-0.741557	D0C5Z5	Ubiquinol oxidase subunit 2
29.7383	29.8299	29.7121	29.6539	29.568	29.7125	29.7982	29.2997	29.6218	29.7222	30.0064	29.8773	30.1383	30.0441	29.8569	29.8982	+	Colony A-3/WT	+	Colony B-3/WT			7	7	7	39	39	39	28.481	17884000000	147	1.81528	0.00790901	-0.250863	-3.35623	1.6564	0.013964	-0.389801	-3.06583	0.829795	0.0992725	-0.177449	-1.66001	D0C5Z6	RDD family protein
34.8313	34.8037	34.8493	34.9743	34.824	34.7566	34.8419	34.7874	34.751	34.8215	34.6657	34.8334	34.926	35.0945	34.9905	34.9545	+	Colony A-3/WT	+	Colony B-3/WT	+	Colony C-3/WT	54	54	54	71.7	71.7	71.7	86.663	596950000000	1443	1.27534	0.0271233	-0.126711	-2.40343	2.41318	0.00356873	-0.188894	-4.55726	2.23989	0.00449213	-0.223473	-4.18897	D0C5Z7	Phosphoenolpyruvate synthase
30.2062	30.2334	30.2803	30.224	30.1952	30.2886	29.9971	30.1204	30.2308	30.5026	30.0696	30.1841	30.5535	30.5563	30.5496	30.4844	+	Colony A-3/WT	+	Colony B-3/WT	+	Colony C-3/WT	13	13	13	57.9	57.9	57.9	31.216	25398000000	268	4.86011	0	-0.299983	-12.8261	3.02764	0.000589792	-0.385633	-6.03154	1.67427	0.0164828	-0.289195	-3.09799	D0C5Z8	Putative phosphoenolpyruvate synthase regulatory protein
33.4349	33.4818	33.4165	33.4394	31.9085	31.8753	31.665	31.7235	33.2732	33.2209	33.3942	33.2949	29.5045	29.4859	29.6264	29.5019	+	Colony A-3/WT	+	Colony B-3/WT	+	Colony C-3/WT	54	54	54	73.4	73.4	73.4	94.389	122830000000	970	10.4397	0	3.91348	110.852	7.34592	0	2.26339	33.7447	9.50132	0	3.76612	77.3119	D0C5Z9	Poly-beta-1,6 N-acetyl-D-glucosamine export porin PgaA
32.305	32.3661	32.4434	32.5455	30.6554	30.7864	30.6221	30.5489	32.0372	31.9021	32.1471	32.1087	28.5027	28.7294	28.8065	28.6632	+	Colony A-3/WT	+	Colony B-3/WT	+	Colony C-3/WT	30	30	30	73.7	73.7	73.7	68.952	56506000000	476	8.10049	0	3.73955	45.1239	6.49278	0	1.97774	24.271	7.79295	0	3.37335	40.0868	D0C600	Poly-beta-1,6-N-acetyl-D-glucosamine N-deacetylase PgaB
27.3448	27.009	26.6824	27.1836	25.8869	25.8827	25.5351	25.6025	27.1463	27.5948	26.661	26.5269	24.3368	24.843	23.1793	24.4251	+	Colony A-3/WT	+	Colony B-3/WT	+	Colony C-3/WT	6	6	6	17.6	17.6	17.6	48.412	1577300000	49	3.52163	0.000351544	2.85891	7.45256	2.22474	0.00464501	1.53074	4.15761	3.18292	0.000637363	2.78621	6.45281	D0C601	Poly-beta-1,6-N-acetyl-D-glucosamine synthase
28.0734	28.2461	28.2577	28.27	25.3314	25.9568	25.2993	25.3025	26.8508	27.3373	26.8479	27.6193	24.0906	23.2046	25.5535	23.104	+	Colony A-3/WT	+	Colony B-3/WT	+	Colony C-3/WT	5	5	5	43.5	43.5	43.5	18.171	2329700000	52	3.51294	0.000348235	4.22361	7.42543	1.34282	0.0265367	1.4843	2.51794	2.74174	0.00226052	3.17564	5.30998	D0C602	Poly-beta-1,6-N-acetyl-D-glucosamine biosynthesis protein PgaD
27.0292	27.0341	27.1882	27.272	27.9838	27.8696	27.7547	27.4888	27.0027	27.1888	27.5201	27.1861	27.6553	28.0089	28.0529	27.7618	+	Colony A-3/WT			+	Colony C-3/WT	11	11	11	46.3	46.3	46.3	41.834	3741500000	82	3.21181	0.000453125	-0.73885	-6.53364	0.276569	0.380493	-0.0955324	-0.668011	2.37402	0.00361965	-0.645321	-4.47241	D0C604	Luciferase family oxidoreductase, FMN-dependent, PP_0088 family
32.0221	31.8827	31.7883	31.912	32.0451	32.1737	32.0355	31.8294	32.008	32.0096	32.0787	31.9099	32.1021	32.0551	32.1413	32.2103	+	Colony A-3/WT			+	Colony C-3/WT	15	15	15	71	71	71	30.4	83593000000	431	2.08575	0.00444491	-0.225929	-3.87603	0.64973	0.13551	-0.106289	-1.35566	1.40805	0.0276745	-0.125667	-2.62962	D0C608	DJ-1/PfpI family protein
30.2779	30.2084	30.1255	30.1418	30.1266	30.3629	30.2553	30.2206	30.2434	30.5193	30.3087	30.1962	30.7439	30.8186	30.7851	30.7463	+	Colony A-3/WT	+	Colony B-3/WT	+	Colony C-3/WT	23	23	23	62.7	62.7	62.7	40.585	27207000000	348	5.25296	0	-0.585106	-14.9747	4.29837	0	-0.532153	-10.2499	3.09567	0.000974619	-0.45655	-6.21343	D0C609	Peptide chain release factor 1
27.6388	27.3778	27.7028	27.631	27.1808	27.5701	27.2754	27.3224	27.1272	27.1616	27.051	27.224	27.423	27.2483	27.3099	27.1972	+	Colony A-3/WT			+	Colony C-3/WT	7	7	7	44.7	44.7	44.7	30.496	3730900000	45	1.82847	0.00766942	0.293007	3.38079	0.171625	0.529448	0.042583	0.442609	1.35497	0.0304814	-0.153639	-2.53867	D0C610	Release factor glutamine methyltransferase
26.3943	26.4674	26.5183	26.6407	26.4137	26.3476	26.6695	26.4893	26.366	26.737	26.4862	26.5721	26.6306	26.4389	26.7694	26.8249							9	9	9	32.7	32.7	32.7	39.242	1870900000	84	0.794341	0.0819717	-0.160768	-1.60067	0.842712	0.084728	-0.185948	-1.68158	0.493818	0.233218	-0.125656	-1.08212	D0C611	Transcriptional regulator, AraC family
32.9652	33.0934	33.0569	32.9807	33.4969	33.2005	33.2657	33.1973	33.459	33.3599	33.1223	33.3556	32.8238	32.8159	32.8703	32.9168	+	Colony A-3/WT	+	Colony B-3/WT	+	Colony C-3/WT	16	16	16	81.6	81.6	81.6	27.093	181560000000	690	2.31644	0.00268713	0.167351	4.3494	2.94634	0.000695971	0.433386	5.8195	3.09906	0.000979592	0.467516	6.22259	D0C612	Oxidoreductase, short chain dehydrogenase/reductase family protein
23.167	24.9286	24.4724	24.0796	25.7697	24.7644	23.811	24.1183	24.227	24.2119	23.1855	24.1848	23.9084	23.366	24.413	23.9014							3	3	3	7.9	7.9	7.9	61.312	544420000	9	0.250564	0.395251	0.264738	0.614237	0.727735	0.111902	0.71866	1.48853	0.0584489	0.816173	0.0551248	0.165376	D0C614	Putative acetyl-coenzyme A synthetase
26.8287	26.833	26.5159	26.794	26.6998	26.7004	27.0754	26.7184	26.2643	26.7049	26.6535	26.4545	26.2605	26.6006	26.3514	26.3301	+	Colony A-3/WT	+	Colony B-3/WT			7	7	7	38	38	38	28.768	1939100000	74	1.81675	0.00791621	0.357285	3.35895	1.88304	0.00854361	0.412879	3.48325	0.48633	0.237449	0.133682	1.06861	D0C616	ThiF family protein
30.6958	30.785	30.6905	30.7682	30.4146	30.4044	30.2363	30.2856	30.9356	30.8242	30.7372	30.8386	30.6659	30.7512	30.8227	30.6526			+	Colony B-3/WT			21	21	21	57.9	57.9	57.9	48.657	32452000000	339	0.0922949	0.682894	0.011806	0.253226	3.21196	0.000228814	-0.387874	-6.53407	1.00427	0.0655249	0.110828	1.95027	D0C617	ABC1 family protein
25.0258	25.2242	24.6404	24.6153	24.8567	24.723	24.655	23.4707	25.578	25.3305	24.0874	24.919	25.8023	25.9062	25.2805	25.4203	+	Colony A-3/WT	+	Colony B-3/WT			4	4	4	35.7	35.7	35.7	14.14	689030000	20	1.8571	0.00746369	-0.72591	-3.43437	1.7946	0.0108042	-1.176	-3.31784	0.874846	0.0880731	-0.623605	-1.73516	D0C618	7,8-dihydroneopterin aldolase
25.6855	25.8572	24.7314	25.4549	25.5763	22.6938	25.6438	25.2326	25.2293	25.664	25.6154	25.4675	25.1887	25.4677	25.5544	24.8121							10	10	10	15.5	15.5	15.5	99.122	930540000	30	0.239339	0.407313	0.176518	0.590641	0.267194	0.390385	-0.469052	-0.648763	0.577798	0.18504	0.238343	1.23106	D0C623	ATPase/histidine kinase/DNA gyrase B/HSP90 domain protein
25.9261	25.7725	25.5737	25.8217	25.8931	25.574	25.6784	25.9449	25.6809	25.4785	25.5909	25.4932	26.1248	26.176	26.1939	26.0787	+	Colony A-3/WT	+	Colony B-3/WT	+	Colony C-3/WT	9	9	9	47.1	47.1	47.1	27.205	1147200000	60	2.48696	0.00174026	-0.369859	-4.71981	2.17133	0.00499528	-0.370759	-4.04815	4.43173	0	-0.582484	-10.8142	D0C624	KDP operon transcriptional regulatory protein KdpE
27.4066	27.4956	27.0724	27.3798	27.6789	27.7386	27.7031	27.4286	27.1548	27.7626	27.5129	27.4353	27.0804	27.2047	27.3264	27.1566			+	Colony B-3/WT			6	6	6	37.9	37.9	37.9	21.31	3401400000	57	0.668926	0.113742	0.146588	1.38854	2.64959	0.00187692	0.44528	5.09113	1.05044	0.0599465	0.274369	2.02699	D0C626	Uncharacterized protein
29.5411	30.0227	29.6515	29.8184	29.4273	29.3234	29.4124	29.4956	29.643	29.4969	29.6873	29.6571	29.5962	29.466	29.3838	29.3889	+	Colony A-3/WT			+	Colony C-3/WT	13	13	13	87.2	87.2	87.2	23.555	15008000000	209	1.38086	0.0219605	0.299702	2.58295	0.303908	0.349115	-0.0440392	-0.723325	1.32652	0.0321079	0.162374	2.4902	D0C627	3-demethoxyubiquinol 3-hydroxylase
24.1875	23.8284	23.1672	24.1367	25.4529	23.8153	24.9695	22.1521	24.6441	24.73	22.9425	24.5445	23.406	23.4555	24.5116	24.9798							1	1	1	3.2	3.2	3.2	48.5	440650000	14	0.227602	0.42385	-0.258269	-0.565707	0.00370043	0.986299	0.00921917	0.0110842	0.0791038	0.76438	0.127041	0.219575	D0C628	Transporter, major facilitator family protein
31.1202	31.0933	30.9543	31.2568	31.0909	31.1935	30.9445	31.0176	31.2051	31.3812	31.1636	31.2027	31.1703	31.2387	31.1935	31.1698			+	Colony B-3/WT			48	48	48	68.2	68.2	68.2	101.76	45654000000	714	0.650319	0.119842	-0.0869341	-1.35667	1.25337	0.0317513	-0.131463	-2.36632	0.38398	0.311094	0.0450602	0.879296	D0C629	Outer membrane protein, OMP85 family
30.5028	30.4473	30.3074	30.4026	30.4379	30.3445	30.3181	30.2294	30.3459	30.7072	30.41	30.5227	30.4272	30.555	30.6142	30.5359	+	Colony A-3/WT	+	Colony B-3/WT			70	70	70	66.7	66.7	66.7	164.23	27993000000	840	1.08052	0.0411531	-0.118062	-2.07701	1.87051	0.00876768	-0.200638	-3.4596	0.159504	0.592569	-0.0366249	-0.414929	D0C630	Uncharacterized protein
27.4105	27.7381	27.517	27.7539	28.0214	27.7388	28.3115	27.7814	27.8346	27.0633	27.974	28.0207	28.1532	28.0691	28.1606	27.9959	+	Colony A-3/WT					6	6	6	45.4	45.4	45.4	13.822	4733900000	56	2.72545	0.00129032	-0.489804	-5.27085	0.425418	0.246064	-0.131418	-0.9571	0.816486	0.102737	-0.371509	-1.63776	D0C631	Uncharacterized protein
35.5435	35.3511	35.2556	35.5027	35.4919	35.4867	35.4848	35.5105	35.5604	35.7666	35.4695	35.4609	35.73	35.9089	35.815	35.8318	+	Colony A-3/WT	+	Colony B-3/WT	+	Colony C-3/WT	69	69	69	88.1	88.1	88.1	94.754	993720000000	2042	2.75854	0.00111614	-0.408221	-5.35058	3.9303	0.000223776	-0.327981	-8.82728	1.73853	0.0139849	-0.257117	-3.2147	D0C632	Aconitate hydratase B
25.8726	26.0892	25.717	25.9811	26.3904	26.5904	26.0543	26.3045	26.1583	26.448	25.9375	25.777	27.4413	27.4593	27.0838	25.5522	+	Colony A-3/WT					5	5	5	57.7	57.7	57.7	15.729	1945500000	35	1.10056	0.039459	-0.969155	-2.11039	0.548339	0.174331	-0.549247	-1.1793	0.849052	0.0940442	-0.803945	-1.69216	D0C636	Uncharacterized protein
27.9371	27.8473	27.8247	27.9009	27.6628	27.6794	27.7823	27.8435	28.1597	27.9753	27.9766	28.2066	28.0437	27.9908	28.2096	28.0465	+	Colony A-3/WT	+	Colony B-3/WT			11	11	11	56.4	56.4	56.4	29.918	5152700000	163	1.95743	0.00597849	-0.195134	-3.62507	2.6832	0.00176672	-0.33064	-5.17023	0.0308929	0.896581	0.00691128	0.0898409	D0C637	Uncharacterized protein
28.6208	28.5469	28.7817	28.7214	29.2744	28.9902	29.1729	29.215	28.9911	28.8135	29.0297	28.933	28.8157	28.7626	28.78	28.8182	+	Colony A-3/WT	+	Colony B-3/WT	+	Colony C-3/WT	12	12	12	54.2	54.2	54.2	35.109	9381000000	182	1.24045	0.0291113	-0.126441	-2.34456	2.96808	0.000703704	0.369013	5.87563	1.62437	0.0178928	0.147716	3.00844	D0C638	Putative HTH-type transcriptional regulator MetR
25.6039	26.7159	26.945	26.746	26.4772	26.4712	26.3584	26.0958	27.5577	26.2917	27.2393	26.6991	25.931	26.4702	25.6935	26.6763							5	5	5	57.5	57.5	57.5	10.396	1918000000	37	0.350313	0.288532	0.309942	0.814711	0.264297	0.393943	0.15789	0.642783	1.08223	0.0564164	0.754175	2.07986	D0C640	Uncharacterized protein (Fragment)
26.0222	26.1279	26.3144	26.3322	26.4072	26.3212	26.5599	26.4162	26.9652	26.4941	26.6512	26.4785	26.9417	26.6169	26.453	26.5931	+	Colony A-3/WT					6	6	6	38.5	38.5	38.5	26.672	1958400000	88	1.91351	0.00660172	-0.452021	-3.54103	1.01262	0.0565618	-0.225078	-1.96414	0.00862241	0.969981	-0.003932	-0.0256844	D0C641	Pseudouridine synthase
25.1067	25.436	25.8543	25.6954	25.5696	25.6006	24.9992	24.838	26.3422	26.093	26.0938	25.8237	24.7336	24.74	24.2229	24.5866	+	Colony A-3/WT	+	Colony B-3/WT	+	Colony C-3/WT	5	5	5	33.3	33.3	33.3	17.371	886630000	32	2.46918	0.00187964	0.952331	4.68031	1.59887	0.0159299	0.681092	2.96301	4.09129	0.000265193	1.51742	9.42626	D0C642	Toxin-antitoxin system, toxin component, GNAT family
29.8077	29.8526	29.8879	29.9074	29.5889	29.8425	30.1959	29.8849	30.0484	29.6008	29.9617	30.1209	30.1996	29.8949	30.0127	30.0026	+	Colony A-3/WT					8	8	8	78.4	78.4	78.4	11.669	19593000000	118	1.29825	0.0257064	-0.163549	-2.44219	0.487098	0.20786	-0.149421	-1.07	0.30126	0.390015	-0.0945001	-0.71802	D0C643	Addiction module antitoxin, RelB/DinJ family
24.2687	24.1567	23.8123	24.5744	24.3886	24.1883	24.3257	24.332	23.0014	24.0447	24.3919	24.736	24.2823	24.4022	24.4122	24.3945							3	3	3	12.9	12.9	12.9	35.051	299610000	17	0.481318	0.193823	-0.169789	-1.05955	0.575407	0.162624	-0.0641346	-1.22688	0.381954	0.312492	-0.32931	-0.875446	D0C644	Pseudouridine synthase, RluA family
28.9605	29.0038	28.9577	28.6153	28.2763	28.5447	28.8104	28.2343	28.757	28.2606	28.4822	28.314	29.2033	28.8644	29.2021	28.9629			+	Colony B-3/WT	+	Colony C-3/WT	8	8	8	68.8	68.8	68.8	18.45	8658900000	152	0.673001	0.112666	-0.173862	-1.39551	2.00901	0.00656645	-0.591806	-3.72496	2.28999	0.00419701	-0.604745	-4.29358	D0C645	Hydrolase, P-loop family
28.8854	28.6405	28.806	28.7229	28.7376	28.662	28.9079	28.7331	28.9513	28.939	28.8602	28.9657	28.89	28.9057	28.9552	28.9048	+	Colony A-3/WT	+	Colony B-3/WT			26	26	26	55.1	55.1	55.1	73.061	9293300000	289	1.47657	0.0172403	-0.150263	-2.74811	1.53007	0.0180169	-0.153781	-2.84155	0.219884	0.490172	0.0151267	0.549156	D0C646	DNA mismatch repair protein MutL
27.4084	27.316	27.3296	27.4496	27.3815	27.5978	27.5588	27.3688	27.5409	27.2536	27.5287	27.5676	28.1279	28.0214	28.078	28.1475	+	Colony A-3/WT	+	Colony B-3/WT	+	Colony C-3/WT	9	9	9	37.3	37.3	37.3	35.827	4043300000	99	5.55483	0	-0.717767	-16.8545	4.08493	0	-0.616983	-9.40195	3.65813	0.000407843	-0.621016	-7.88983	D0C647	tRNA dimethylallyltransferase
32.8997	32.9903	32.8492	33.3168	33.3683	33.5335	33.6267	33.1965	33.3874	33.4125	33.5725	33.4761	33.2018	32.8731	33.1197	32.9102			+	Colony B-3/WT	+	Colony C-3/WT	8	8	8	38.4	38.4	38.4	17.263	197920000000	335	0.0318678	0.874898	-0.0122166	-0.0925824	1.76802	0.011297	0.405016	3.26879	2.54511	0.002669	0.435903	4.85047	D0C648	RNA-binding protein Hfq
31.0309	30.9279	30.9237	30.9979	31.07	31.1501	31.3341	31.0037	30.7638	30.7531	30.7729	30.7982	30.6213	30.5743	30.48	30.374	+	Colony A-3/WT	+	Colony B-3/WT	+	Colony C-3/WT	8	8	8	46.1	46.1	46.1	24.842	37175000000	181	3.54721	0.000357488	0.45769	7.53294	3.36259	0.000248276	0.627049	6.96865	2.46639	0.00276819	0.259584	4.67412	D0C650	Putative oxygen-insensitive NAD(P)H nitroreductase
24.1833	23.967	22.4885	24.1422	23.3841	24.4729	24.2661	24.4876	24.3142	24.0294	24.6375	24.2556	24.3062	24.2952	24.3377	24.3002							6	6	6	28	28	28	28.216	236000000	29	0.744611	0.0930641	-0.614542	-1.51704	0.244398	0.419341	-0.157128	-0.601304	0.00162035	0.994351	-0.000612259	-0.0048651	D0C652	UDP-2,3-diacylglucosamine hydrolase
34.6366	34.5359	34.3603	34.4231	34.554	34.4886	34.334	34.3514	34.2078	34.5102	34.277	34.5133	34.4814	34.6479	34.8178	34.5718			+	Colony B-3/WT	+	Colony C-3/WT	14	14	14	91.1	91.1	91.1	18.515	473710000000	660	0.733343	0.095618	-0.140764	-1.49801	1.16561	0.038742	-0.197713	-2.21896	1.25724	0.0371391	-0.252629	-2.37287	D0C653	Peptidyl-prolyl cis-trans isomerase
32.1928	32.0689	32.0581	32.1804	32.3373	32.2667	32.2282	32.2108	32.3116	32.3911	32.4205	32.3873	32.2907	32.4676	32.4161	32.3542	+	Colony A-3/WT	+	Colony B-3/WT			35	35	35	61.9	61.9	61.9	65.378	100810000000	739	2.5715	0.00157065	-0.257061	-4.91052	1.36581	0.0251393	-0.121389	-2.55719	0.0349807	0.884766	-0.00453663	-0.1013	D0C654	Glutamine--tRNA ligase
28.5721	28.6576	28.882	28.7537	28.3915	28.4958	28.241	28.3727	28.2727	28.0011	28.3407	28.4752	28.5191	28.7879	28.7103	28.6805			+	Colony B-3/WT	+	Colony C-3/WT	7	7	7	45.8	45.8	45.8	26.848	7179000000	79	0.188244	0.480617	0.0418859	0.479933	2.09092	0.00563719	-0.299232	-3.88633	1.89532	0.00961995	-0.402022	-3.50649	D0C655	Class I glutamine amidotransferase
31.3643	31.224	31.3778	31.4202	30.9515	30.7913	30.9033	30.6822	31.0396	31.2979	31.0202	31.1995	31.3133	31.3784	31.3794	31.4328			+	Colony B-3/WT	+	Colony C-3/WT	27	27	27	71.8	71.8	71.8	55.262	48913000000	398	0.243483	0.402813	-0.0294118	-0.599379	3.80204	0.000202532	-0.543904	-8.37418	1.8093	0.0120768	-0.236674	-3.34511	D0C659	Aldehyde dehydrogenase B
27.1123	27.5896	26.4807	26.7575	27.0371	27.1218	26.4853	26.6471	27.1793	27.0919	26.9566	27.0946	27.2592	27.4595	27.0996	27.015			+	Colony B-3/WT			7	7	7	26.7	26.7	26.7	36.709	2707400000	67	0.3756	0.267082	-0.223301	-0.863342	1.10931	0.0435129	-0.38551	-2.12497	0.549319	0.201212	-0.127713	-1.18103	D0C661	Hydrolase, alpha/beta domain protein
28.9861	28.9283	28.6821	28.8624	28.7494	28.8466	28.6287	28.7425	29.1186	29.1192	28.8291	29.1174	29.7783	29.789	29.9119	29.8131	+	Colony A-3/WT	+	Colony B-3/WT	+	Colony C-3/WT	18	18	18	63.1	63.1	63.1	41.018	11795000000	277	4.93224	0	-0.958353	-13.1973	5.99754	0	-1.0813	-20.0287	4.21234	0.000285714	-0.776999	-9.90016	D0C662	1,3-propanediol dehydrogenase
27.8847	27.8051	27.8079	28.1973	28.1017	27.8727	27.9335	27.9313	28.0405	27.9498	28.1588	28.0501	28.0756	27.9437	27.9788	27.8754							18	18	18	48.2	48.2	48.2	64.421	5157200000	220	0.169456	0.512103	-0.0446134	-0.437686	0.0461991	0.829828	-0.0085454	-0.132283	0.654305	0.152409	0.0814486	1.36351	D0C663	AAA domain-containing protein
25.2693	25.4282	25.4029	25.3995	25.3915	25.7557	25.7065	25.1894	25.8321	24.4272	25.8742	25.6741	25.879	26.3167	26.4955	26.4188	+	Colony A-3/WT	+	Colony B-3/WT	+	Colony C-3/WT	2	2	2	12.4	12.4	12.4	13.827	1087600000	52	3.1418	0.000517824	-0.902501	-6.33911	2.14135	0.00535363	-0.766677	-3.98742	1.17002	0.0463694	-0.825576	-2.22634	D0C664	Putative 5-carboxymethyl-2-hydroxymuconate delta isomerase
26.6392	27.1328	27.0069	26.6118	26.0741	26.74	26.9058	26.4238	26.4982	26.2362	26.7849	26.6005	27.7818	27.7721	27.8768	27.7831	+	Colony A-3/WT	+	Colony B-3/WT	+	Colony C-3/WT	6	6	6	37.1	37.1	37.1	29.19	2704200000	96	3.43104	0.000332584	-0.955791	-7.17365	3.32058	0.000242697	-1.26755	-6.84518	4.4459	0	-1.27349	-10.8758	D0C665	Hydroxyethylthiazole kinase
24.6623	24.5439	23.4454	24.7571	25.1289	24.4737	24.2256	23.8426	23.5471	23.5001	23.0365	24.6028	24.2534	24.3602	24.342	24.1755							4	4	4	12.7	12.7	12.7	48.098	251150000	24	0.0812466	0.713511	0.0694075	0.22509	0.194205	0.492568	0.13494	0.493152	0.932252	0.0781874	-0.611132	-1.83065	D0C666	Uncharacterized protein
32.2717	32.2052	32.2405	32.2802	32.4101	32.4742	32.339	32.412	32.4402	32.5683	32.5969	32.562	32.4285	32.6491	32.7505	32.6896	+	Colony A-3/WT	+	Colony B-3/WT			51	51	51	65.7	65.7	65.7	98.097	113930000000	924	2.72301	0.00128467	-0.380005	-5.26499	1.57825	0.0166014	-0.220609	-2.92644	0.514421	0.22096	-0.0875797	-1.11907	D0C668	Membrane alanyl aminopeptidase
23.9873	23.6832	23.8624	24.0171	22.9261	24.4455	23.4734	24.0026	24.1624	24.5489	24.1003	24.5275	23.9114	25.4714	23.9201	24.6588							2	2	2	32.7	32.7	32.7	15.033	225260000	22	0.789343	0.0828864	-0.602902	-1.59229	0.77645	0.098022	-0.77852	-1.57064	0.152964	0.604168	-0.155664	-0.399824	D0C669	Spore Coat Protein U domain protein
25.9122	23.8681	25.7385	23.6475	26.8817	26.7159	26.6907	26.5089	26.8609	26.5922	26.2337	26.4284	25.3429	25.6962	23.1196	24.1151			+	Colony B-3/WT	+	Colony C-3/WT	10	10	10	50.9	50.9	50.9	26.234	1291900000	44	0.0970878	0.670936	0.223141	0.26528	1.93507	0.00753236	2.13085	3.58219	1.7534	0.0136176	1.96034	3.24192	D0C670	PapD_N domain-containing protein
23.9691	23.898	24.2291	24.1052	24.0546	24.782	23.6001	24.2337	23.5041	23.6968	23.8265	25.0853	24.4811	24.4639	24.4731	24.2977	+	Colony A-3/WT					4	4	4	21.5	21.5	21.5	26.299	246590000	27	2.35129	0.00254982	-0.378601	-4.42362	0.477496	0.212796	-0.261355	-1.05263	0.50907	0.225048	-0.400783	-1.1095	D0C673	Glutathione S-transferase, N-terminal domain protein
27.6442	27.8213	27.5909	27.4487	26.5386	26.205	26.9015	26.3939	27.0093	26.7605	26.8405	26.9382	26.9189	26.8731	27.1857	27.2221	+	Colony A-3/WT	+	Colony B-3/WT			7	7	7	49.7	49.7	49.7	21.15	2710100000	56	2.55628	0.00168961	0.576307	4.87583	1.69284	0.0131032	-0.540228	-3.13155	0.764699	0.115321	-0.162811	-1.55088	D0C676	Chorismate mutase
23.2633	23.5997	25.1246	25.2654	25.0513	24.7754	25.3916	25.3358	24.4344	25.0477	25.2599	25.2059	24.9536	25.0924	25.3157	23.1167							3	3	3	17	17	17	19.008	586020000	8	0.163594	0.522222	-0.306343	-0.424314	0.441278	0.236229	0.518927	0.986439	0.2821	0.411632	0.367385	0.679299	D0C677	Transcriptional regulator, AsnC family
29.5466	29.5234	29.509	29.5991	29.1951	29.3013	29.2194	29.0811	29.4686	29.5707	29.5325	29.4387	29.64	29.6464	29.6469	29.5001			+	Colony B-3/WT	+	Colony C-3/WT	34	34	34	60.8	60.8	60.8	81.818	14538000000	468	0.764258	0.088205	-0.0638475	-1.55014	3.38865	0.000254118	-0.409108	-7.04611	1.18556	0.0446972	-0.105722	-2.25236	D0C682	TonB-dependent siderophore receptor
28.9385	28.8448	28.8494	28.943	29.2757	29.0982	29.2419	29.0473	29.2549	29.4523	29.3228	29.2775	28.7957	28.9754	28.8482	29.015			+	Colony B-3/WT	+	Colony C-3/WT	12	12	12	36.7	36.7	36.7	46.878	10974000000	150	0.0912505	0.685769	-0.0146403	-0.250587	1.83915	0.00942999	0.257209	3.40074	3.07166	0.00106468	0.418275	6.14878	D0C683	Transporter, small conductance mechanosensitive ion channel MscS family protein
25.6346	26.0167	26.6594	26.6274	26.5594	27.0045	27.1067	26.9454	26.9278	26.6146	27.3499	26.9416	27.3441	27.7311	27.4283	27.5211	+	Colony A-3/WT	+	Colony B-3/WT	+	Colony C-3/WT	3	3	3	49.4	49.4	49.4	9.2734	2611200000	44	2.54435	0.00173262	-1.27163	-4.84875	2.21249	0.00473684	-0.602154	-4.13238	1.71965	0.0146752	-0.547678	-3.18024	D0C684	Uncharacterized protein
23.9456	25.2844	23.7211	25.6931	24.3587	23.7994	24.403	24.1173	23.9904	23.5887	23.8854	23.3167	24.8199	23.9456	23.9016	24.5047					+	Colony C-3/WT	3	3	3	22.3	22.3	22.3	21.863	172680000	16	NaN	1	0	NaN	0.183812	0.508918	-0.123346	-0.470046	1.16274	0.0473455	-0.597627	-2.21417	D0C685	Uncharacterized protein
24.4488	25.8859	23.5537	25.0432	24.0306	24.8099	24.4806	24.4589	26.0082	24.7411	24.0477	24.4961	22.8227	23.992	24.595	22.4858							3	3	3	39.8	39.8	39.8	10.447	446930000	15	0.918306	0.0600596	1.25903	1.80748	0.956661	0.0639763	0.971116	1.87121	1.083	0.0563376	1.3494	2.08115	D0C686	Uncharacterized protein
26.1822	25.93	25.7984	25.4071	25.7402	25.6069	25.747	25.6976	25.7877	25.8336	26.1734	26.0567	24.7567	25.2398	25.2475	25.2143	+	Colony A-3/WT	+	Colony B-3/WT	+	Colony C-3/WT	5	5	5	49.6	49.6	49.6	14.402	1000300000	59	1.92088	0.00643062	0.714873	3.55508	2.48409	0.00276151	0.583387	4.71341	2.874	0.00173913	0.848297	5.6355	D0C687	Uncharacterized protein
24.29	25.5906	23.8138	24.8016	25.4604	24.8059	24.6419	24.4986	24.6633	25.2854	24.7247	25.0428	26.3699	26.7199	26.2305	25.8997	+	Colony A-3/WT	+	Colony B-3/WT	+	Colony C-3/WT	15	15	15	31.5	31.5	31.5	79.515	838790000	81	2.16619	0.00359605	-1.68099	-4.03771	2.75584	0.00148293	-1.4533	-5.34404	3.07632	0.00107268	-1.37593	-6.16126	D0C689	TonB-dependent siderophore receptor
28.0555	27.8261	28.6001	28.7274	28.6827	29.0369	28.8706	28.5664	29.8516	29.1657	29.0622	28.8392	24.709	23.7189	23.0564	22.1489	+	Colony A-3/WT	+	Colony B-3/WT	+	Colony C-3/WT	5	5	5	34	34	34	15.623	6948200000	49	3.8149	0.000129412	4.894	8.4187	4.18397	0	5.38085	9.78722	4.23627	0.000292683	5.82136	9.99635	D0C692	Uncharacterized protein
27.2626	26.9087	27.0156	27.1537	26.9903	26.9604	27.4334	26.9216	26.5508	27.1917	26.7206	26.7788	26.824	26.7462	27.0935	26.8735							7	7	7	14.2	14.2	14.2	60.405	2630800000	39	0.955011	0.0541023	0.20088	1.86846	0.65335	0.134444	0.192135	1.36187	0.186531	0.541824	-0.073812	-0.476116	D0C693	Putative septum site-determining protein MinC
33.1817	33.2232	33.1669	33.1031	33.8855	33.7136	33.5466	33.9622	33.3624	33.7243	33.4366	33.5672	33.3705	33.3598	33.3552	33.6688	+	Colony A-3/WT	+	Colony B-3/WT			9	9	9	78.9	78.9	78.9	15.775	231510000000	272	1.80765	0.00806176	-0.269855	-3.34204	1.51244	0.0187412	0.33842	2.81066	0.322652	0.369056	0.0840406	0.760595	D0C694	Universal stress protein
32.9834	33.0346	32.9327	32.8767	32.8738	32.9236	33.0197	32.7877	32.813	32.7569	33.0442	33.2594	32.5273	32.52	32.538	32.6689	+	Colony A-3/WT	+	Colony B-3/WT	+	Colony C-3/WT	27	27	27	92.1	92.1	92.1	36.305	146920000000	473	3.70348	0.00027957	0.393333	8.03983	2.87245	0.00100882	0.337642	5.63161	1.81697	0.0118503	0.404838	3.35936	D0C6A4	Transaldolase
24.7702	24.6786	24.0242	24.1245	25.1928	25.1943	24.0534	24.6993	24.1593	24.4879	24.6126	24.7082	24.5004	22.4991	24.7499	24.6905							4	4	4	12.1	12.1	12.1	34.132	452420000	34	0.200027	0.462373	0.289395	0.505982	0.514129	0.19227	0.675013	1.11855	0.28798	0.405695	0.382048	0.691243	D0C6A5	Transcriptional regulator, LysR family
30.5393	30.4609	30.749	30.619	31.0436	30.9746	30.9833	30.9135	31.0454	31.072	30.8686	30.8388	31.3234	31.4581	31.2781	31.1622	+	Colony A-3/WT	+	Colony B-3/WT	+	Colony C-3/WT	22	22	22	51.3	51.3	51.3	55.279	41107000000	349	3.75913	0.000122905	-0.713392	-8.22718	2.56636	0.00208542	-0.32671	-4.8988	2.18941	0.0051021	-0.349234	-4.08504	D0C6A7	Acetyl-CoA C-acetyltransferase
31.6717	31.7012	31.6929	31.6859	32.1759	32.0101	32.1679	32.173	31.9353	32.125	31.8337	32.0016	31.8664	31.8815	31.8748	31.8473	+	Colony A-3/WT	+	Colony B-3/WT			25	25	25	80.8	80.8	80.8	48.412	78971000000	498	5.79849	0	-0.179607	-18.5357	3.16587	0.000330579	0.264192	6.40548	0.871718	0.0885351	0.106404	1.72995	D0C6A8	Oxidoreductase, short chain dehydrogenase/reductase family protein
29.8488	29.6237	29.9885	30.0928	30.2203	30.1945	30.2073	30.021	30.2699	30.1612	30.0427	30.0068	30.1256	30.097	30.0534	29.9833							16	16	16	56.7	56.7	56.7	31.919	21503000000	337	0.831673	0.0742484	-0.176347	-1.66315	0.858697	0.0817513	0.0959797	1.70825	0.353768	0.338938	0.0553308	0.821401	D0C6A9	MaoC-like protein
28.3108	27.9473	27.8668	28.0067	28.3002	28.1344	28.2475	28.0309	28.244	27.935	28.0604	28.2293	27.6808	27.767	27.8832	27.8042	+	Colony A-3/WT	+	Colony B-3/WT	+	Colony C-3/WT	14	14	14	48.7	48.7	48.7	47.113	5216900000	188	1.24783	0.0287761	0.249107	2.35699	2.77076	0.00130506	0.394453	5.38023	2.11377	0.00626273	0.333393	3.93195	D0C6B0	Beta-lactamase
24.6868	25.1602	24.6252	24.5306	24.5616	24.2985	24.4511	24.45	25.3889	24.5434	24.7097	24.824	24.3707	24.4239	24.7408	24.1622							4	4	4	40.1	40.1	40.1	22.158	492940000	31	0.895807	0.0639263	0.326287	1.77006	0.0421139	0.842774	0.0158958	0.121078	1.04551	0.0601867	0.442098	2.0188	D0C6B1	Transcriptional regulator, TetR family
29.1593	29.298	29.055	29.2393	29.2269	29.2546	29.1785	29.2104	29.2303	29.3997	29.2479	29.2547	29.5328	29.6147	29.7078	29.6155	+	Colony A-3/WT	+	Colony B-3/WT	+	Colony C-3/WT	23	23	23	42.9	42.9	42.9	78.579	13614000000	378	3.28994	0.000485356	-0.42979	-6.75625	4.29248	0	-0.400096	-10.2256	3.13024	0.000860104	-0.334553	-6.30745	D0C6B3	DNA polymerase III subunit gamma/tau
27.2129	27.2167	27.0281	27.1879	27.724	27.4209	27.7459	27.5182	27.246	27.3403	27.3616	27.0202	27.4646	27.3988	27.7969	27.4578	+	Colony A-3/WT			+	Colony C-3/WT	5	5	5	40.3	40.3	40.3	16.341	3348200000	52	1.96969	0.00575148	-0.368111	-3.64871	0.246114	0.417416	0.0727139	0.604912	1.27771	0.0357877	-0.287501	-2.40742	D0C6B5	Acyl-CoA thioester hydrolase, YbgC/YbaW family
29.6109	29.4784	29.2518	29.3592	30.0646	29.9777	29.7873	29.9574	29.889	29.867	29.9578	29.8562	29.8572	30.061	30.0955	30.1589	+	Colony A-3/WT			+	Colony C-3/WT	13	13	13	50.1	50.1	50.1	41.986	18594000000	209	3.05769	0.000489362	-0.618099	-6.11139	0.506299	0.197224	-0.0963941	-1.10454	1.14275	0.0489922	-0.150653	-2.18075	D0C6B6	Alcohol dehydrogenase, iron-dependent
31.3353	31.3615	31.3301	31.3055	30.8097	30.9103	30.8222	30.6661	31.2775	31.2218	31.4363	31.285	30.9633	31.1277	31.006	31.0739	+	Colony A-3/WT	+	Colony B-3/WT	+	Colony C-3/WT	21	21	21	59	59	59	47.27	44974000000	423	3.57413	0.000366337	0.290337	7.61829	2.08077	0.00565953	-0.240674	-3.86614	2.37805	0.00363694	0.262422	4.4811	D0C6B7	Uncharacterized protein
28.6418	28.62	28.5483	28.1768	28.6053	28.4958	28.8669	28.4513	28.6782	28.0837	28.5279	28.4055	28.7634	28.6446	28.7697	28.897	+	Colony A-3/WT			+	Colony C-3/WT	7	7	7	51.5	51.5	51.5	19.148	7739900000	116	1.1927	0.0321083	-0.271975	-2.26433	0.757617	0.102739	-0.163865	-1.53896	1.34849	0.030902	-0.344875	-2.52762	D0C6B8	Low molecular weight phosphotyrosine protein phosphatase
29.347	29.52	29.4128	29.4355	29.7596	29.7514	29.6447	29.7014	29.4313	29.5092	29.4559	29.5151	29.8228	29.7823	29.8801	29.7402	+	Colony A-3/WT	+	Colony B-3/WT	+	Colony C-3/WT	15	15	15	55.8	55.8	55.8	39.857	15740000000	252	3.72619	0.000284153	-0.377553	-8.11583	1.219	0.0341	-0.0920897	-2.30847	4.00176	0.000242424	-0.328486	-9.08886	D0C6B9	UDP-N-acetylenolpyruvoylglucosamine reductase
27.8333	27.6375	27.5895	27.5365	27.9057	27.6779	27.976	27.6427	27.8609	27.7345	27.8193	27.6998	27.6258	27.76	27.7631	27.6494							16	16	16	49.5	49.5	49.5	42.326	4263500000	172	0.282205	0.358014	-0.0503807	-0.679514	0.515384	0.191695	0.100992	1.12079	0.749211	0.120186	0.0790391	1.5248	D0C6C0	DUF218 domain-containing protein
27.1931	27.0433	26.6391	27.2796	27.6205	27.88	27.6028	27.3248	27.479	27.9012	27.2736	27.2194	27.9183	28.1778	28.0512	28.0916	+	Colony A-3/WT	+	Colony B-3/WT	+	Colony C-3/WT	16	16	16	50.3	50.3	50.3	40.041	4085400000	169	3.27882	0.000480331	-1.02097	-6.72422	1.9462	0.00736488	-0.452711	-3.6035	1.94858	0.00868848	-0.591435	-3.60807	D0C6C1	Hydrolase_4 domain-containing protein
29.3654	29.3984	29.3359	29.4365	29.6703	29.5434	29.5052	29.4844	29.5345	29.6001	29.4587	29.5162	29.3673	29.583	29.3941	29.5429							25	25	25	63.1	63.1	63.1	53.146	14282000000	320	0.74648	0.0926678	-0.0877771	-1.52019	0.540218	0.178386	0.0790238	1.16494	0.401245	0.296092	0.0555739	0.911924	D0C6C2	Glutamate synthase domain protein (Fragment)
28.7361	28.6822	28.4483	28.4411	28.2855	28.0227	27.7416	28.2156	27.8693	28.16	28.1797	28.265	26.7876	27.1263	27.0966	26.821	+	Colony A-3/WT	+	Colony B-3/WT	+	Colony C-3/WT	10	10	9	41.6	41.6	36.8	22.153	5096100000	77	5.03323	0	1.61906	13.7342	3.48815	0.00027204	1.10846	7.34848	4.0747	0.000258065	1.16061	9.36291	D0C6C4	Transcriptional regulator, TetR family
28.6853	28.3328	28.1007	28.1883	28.2086	28.0227	28.4594	28.3279	28.408	28.2302	28.5816	28.4455	27.5518	27.6311	27.6363	27.8169	+	Colony A-3/WT	+	Colony B-3/WT	+	Colony C-3/WT	5	5	5	22.9	22.9	22.9	33.777	5838800000	83	2.50319	0.00175163	0.667775	4.75605	2.81816	0.00122393	0.595633	5.49638	3.77226	0.00019917	0.757319	8.27194	D0C6C5	Uncharacterized protein
28.2343	28.3526	28.098	28.3669	28.1315	28.3846	28.6777	28.0283	28.5675	28.4609	28.6817	28.3317	28.3819	28.4505	28.1842	28.3408							11	11	11	56.9	56.9	56.9	19.054	6646600000	166	0.398767	0.246172	-0.0763955	-0.90726	0.0782976	0.730149	-0.0338187	-0.217494	0.930289	0.0784626	0.171113	1.82739	D0C6C7	Uncharacterized protein
32.6965	32.6217	32.6427	32.8122	32.9741	32.8935	32.9831	32.9517	32.9015	32.7691	32.911	32.9635	33.215	33.1959	33.2281	33.2229	+	Colony A-3/WT	+	Colony B-3/WT	+	Colony C-3/WT	23	23	23	56.1	56.1	56.1	50.353	160670000000	721	4.7076	0	-0.522199	-12.073	4.77779	0	-0.264852	-12.4143	3.64405	0.000401544	-0.329206	-7.84376	D0C6C8	Biotin carboxylase
32.4397	32.463	32.5689	32.5727	31.8449	31.9415	32.5485	32.0413	32.6323	31.9751	32.468	32.3913	32.9019	32.9421	32.8921	33.3449	+	Colony A-3/WT	+	Colony B-3/WT	+	Colony C-3/WT	11	11	11	79.9	79.9	79.9	14.735	123870000000	358	2.36776	0.00245333	-0.509206	-4.45894	2.5474	0.00223188	-0.926212	-4.85565	1.99038	0.00865995	-0.653559	-3.68875	D0C6C9	Biotin carboxyl carrier protein of acetyl-CoA carboxylase
27.3401	27.067	27.3137	27.348	26.9802	27.3935	27.4356	26.7525	27.6441	27.1278	27.4009	27.7098	27.401	26.6036	27.6167	27.6276							4	4	4	44.4	44.4	44.4	16.47	3295300000	52	0.0636902	0.767485	-0.0450177	-0.179313	0.23738	0.429512	-0.171791	-0.586499	0.231816	0.477286	0.15843	0.574691	D0C6D0	3-dehydroquinate dehydratase
25.5208	25.6977	25.7758	25.8138	25.2356	25.2241	25.3942	25.2759	25.9341	26.0885	25.8383	25.3878	25.9342	25.8178	25.7233	25.3657			+	Colony B-3/WT			3	3	3	47.6	47.6	47.6	9.0106	1028200000	47	0.0201732	0.917353	-0.00823975	-0.0593354	1.79813	0.0105131	-0.42783	-3.32438	0.208569	0.505311	0.1019	0.524662	D0C6E2	Uncharacterized protein
25.8808	25.8249	25.7023	25.5112	25.6819	25.5805	25.5433	25.4688	25.6457	25.7247	26.0114	25.6258	26.0544	26.1213	26.2558	25.46			+	Colony B-3/WT			6	6	6	54.9	54.9	54.9	18.716	1114500000	30	0.589802	0.141709	-0.243036	-1.25202	1.17037	0.0382136	-0.404215	-2.22692	0.514901	0.220786	-0.220938	-1.11993	D0C6E3	Molybdopterin converting factor, subunit 2
29.0127	28.6927	28.672	28.7224	28.4085	28.2373	28.5231	28.5373	28.7224	28.7228	29.0087	28.8225	28.6121	28.8758	28.775	28.7351			+	Colony B-3/WT			15	15	15	57.3	57.3	57.3	33.344	8254700000	162	0.0963461	0.672642	0.0254898	0.263421	1.97547	0.00671642	-0.322927	-3.65987	0.344094	0.346921	0.069622	0.80263	D0C6E4	Putative molybdenum cofactor biosynthesis protein C
25.801	25.7435	25.6514	25.6555	26.102	25.7434	25.5012	25.9768	25.7217	25.9971	25.622	26.1971	25.9271	26.0347	26.0545	26.2126	+	Colony A-3/WT					7	7	7	26.3	26.3	26.3	45.083	1191700000	88	2.60248	0.0014731	-0.344412	-4.98167	0.770087	0.0995528	-0.226379	-1.55995	0.561861	0.193592	-0.172764	-1.20312	D0C6E5	Molybdopterin molybdenumtransferase
27.4324	27.7062	27.5855	27.4768	27.6479	27.6858	27.4623	27.6726	27.6543	27.3815	27.5827	27.4799	27.3514	27.4703	27.4373	27.383	+	Colony A-3/WT	+	Colony B-3/WT			10	10	10	52.5	52.5	52.5	18.8	3692100000	122	1.09111	0.0403298	0.139688	2.09464	1.90481	0.00792189	0.20661	3.52448	0.881044	0.0870082	0.11405	1.74548	D0C6E6	Transcriptional regulator, HxlR family
24.6982	24.2504	24.9568	24.7072	25.0589	25.2462	25.0108	24.8366	25.2279	25.004	24.6914	25.0522	25.1802	25.1488	25.0602	24.8165	+	Colony A-3/WT					7	7	7	26.5	26.5	26.5	53.021	627190000	69	1.25187	0.0287612	-0.398285	-2.36381	0.0391464	0.852874	-0.0132933	-0.112883	0.159474	0.592077	-0.0575738	-0.414861	D0C6E7	Transcriptional regulator, GntR family
25.7217	26.3234	26.1023	26.0427	25.4997	26.0331	26.1871	25.6528	25.7682	26.1048	25.7166	25.6617	26.6299	26.9719	26.9363	27.2483	+	Colony A-3/WT	+	Colony B-3/WT	+	Colony C-3/WT	2	2	2	39.8	39.8	39.8	11.698	1563800000	38	2.64071	0.0014958	-0.899084	-5.07037	2.77977	0.00131363	-1.10344	-5.40217	3.38605	0.000460064	-1.13378	-7.03838	D0C6E9	Sulfurtransferase
26.6085	26.1864	26.235	26.3101	26.6899	26.2008	26.8498	26.6835	26.4549	26.2251	26.4658	26.4031	26.6636	27.2538	27.1058	26.8942	+	Colony A-3/WT			+	Colony C-3/WT	3	3	3	34.3	34.3	34.3	11.669	1968600000	39	2.16559	0.00358817	-0.644321	-4.0365	1.01067	0.0568107	-0.373315	-1.96091	2.25784	0.00448256	-0.592112	-4.22628	D0C6F0	Uncharacterized protein
26.6315	26.6039	26.7638	26.5822	26.4111	26.068	26.5825	26.7257	25.9036	26.3253	27.082	26.4073	27.8573	27.2672	27.8733	27.934	+	Colony A-3/WT	+	Colony B-3/WT	+	Colony C-3/WT	2	2	2	37.1	37.1	37.1	13.127	2480800000	33	3.28451	0.000483333	-1.08762	-6.74059	3.0534	0.000596558	-1.28614	-6.09993	2.38731	0.00349278	-1.30339	-4.50109	D0C6F1	Uncharacterized protein
25.3854	25.3568	25.0401	24.9714	25.0464	24.5907	25.1801	24.6399	24.7052	24.7525	25.0808	24.9549	25.1704	25.9275	24.9822	25.0344							5	5	5	58.2	58.2	58.2	13.577	689570000	47	0.139832	0.568354	-0.0901961	-0.369116	0.774581	0.0985859	-0.414327	-1.5675	0.860594	0.0909106	-0.405252	-1.71141	D0C6F2	Sulfur relay protein TusD/DsrE
30.2901	30.0863	30.3761	30.4897	30.8328	30.8623	30.637	30.5047	30.7495	30.5803	30.6382	30.5779	30.1641	29.9932	30.0208	30.0177	+	Colony A-3/WT	+	Colony B-3/WT	+	Colony C-3/WT	15	15	15	64.5	64.5	64.5	38.022	28004000000	328	1.50244	0.0159904	0.26159	2.79317	3.40557	0.000256532	0.660278	7.09682	4.36065	0	0.587551	10.51	D0C6F3	Putative UDP-glucose 4-epimerase
31.3885	31.3456	31.4032	31.5	31.8082	31.8404	31.7738	31.5036	31.7806	31.5583	31.4864	31.4787	31.1289	30.9183	30.9679	30.9574	+	Colony A-3/WT	+	Colony B-3/WT	+	Colony C-3/WT	16	16	16	60.8	60.8	60.8	49.913	55771000000	402	3.48151	0.00034023	0.416211	7.32796	3.74949	0.000196923	0.73842	8.19446	3.3395	0.00044582	0.582878	6.90056	D0C6F4	Fumarate hydratase class II
28.016	27.8609	27.844	27.8159	28.4574	28.5292	28.5017	28.2021	28.1628	28.3315	28.3917	28.2512	27.5201	27.4249	27.5532	27.5614	+	Colony A-3/WT	+	Colony B-3/WT	+	Colony C-3/WT	5	5	5	85.7	85.7	85.7	11.378	5335900000	52	3.28676	0.000484342	0.369331	6.7471	4.51326	0	0.907734	11.173	4.9145	0	0.769422	13.1051	D0C6F5	Uncharacterized protein
25.0851	25.6589	24.945	25.022	24.754	24.2396	24.4325	24.1827	24.785	23.873	25.2291	25.1704	26.2634	26.064	26.4344	26.0868	+	Colony A-3/WT	+	Colony B-3/WT	+	Colony C-3/WT	4	4	4	26.1	26.1	26.1	18.348	826360000	36	2.86329	0.000807631	-1.03442	-5.60862	4.62071	0	-1.80997	-11.6626	2.36749	0.00361392	-1.44783	-4.45836	D0C6F6	Uncharacterized protein
29.4159	29.5152	29.4586	29.4264	29.08	28.8391	29.3065	29.1039	29.1438	28.632	29.34	29.2024	29.3521	29.3455	29.6648	29.4179			+	Colony B-3/WT			12	12	12	72.4	72.4	72.4	18.837	12438000000	128	0.0398796	0.847629	0.00899506	0.114912	1.60994	0.015425	-0.362684	-2.9827	1.10963	0.0527217	-0.36552	-2.12549	D0C6F7	Uncharacterized protein
23.9067	24.2255	23.1075	24.1245	23.7856	24.0526	24.1477	24.1029	24.6259	24.5864	24.3925	24.1039	24.8457	24.2772	23.9135	24.1538							5	5	5	21.6	21.6	21.6	47.791	337230000	47	0.687606	0.107618	-0.456501	-1.42042	0.610729	0.14935	-0.275374	-1.28839	0.225619	0.483531	0.129621	0.561465	D0C6F8	FAD dependent oxidoreductase
25.8079	25.5888	25.4639	25.2826	25.4933	25.4177	24.6597	25.1628	25.4632	25.346	24.934	25.2293	26.2097	26.0304	25.6341	25.8344	+	Colony A-3/WT	+	Colony B-3/WT	+	Colony C-3/WT	7	7	7	42.1	42.1	42.1	24.72	948820000	44	1.24736	0.0287557	-0.391378	-2.3562	1.78346	0.0111239	-0.743782	-3.29725	2.17975	0.00547632	-0.684027	-4.06531	D0C6F9	Uncharacterized protein
26.9109	27.2182	27.053	26.8295	25.4803	26.524	26.8908	26.0285	26.8653	26.2828	26.7619	27.0156	27.1059	27.6094	27.2611	27.8555	+	Colony A-3/WT	+	Colony B-3/WT	+	Colony C-3/WT	4	4	4	35.6	35.6	35.6	17.375	2477100000	62	1.274	0.0271821	-0.455101	-2.40116	1.89551	0.00817605	-1.2271	-3.50685	1.69478	0.0157347	-0.726593	-3.13508	D0C6G0	2-C-methyl-D-erythritol 2,4-cyclodiphosphate synthase
26.7768	27.1291	26.4196	26.7681	26.3463	27.0271	26.9835	26.7877	26.8782	26.7278	26.932	26.6447	27.4646	27.2362	27.336	27.5173	+	Colony A-3/WT	+	Colony B-3/WT	+	Colony C-3/WT	3	3	3	33.3	33.3	33.3	20.131	2552900000	28	2.09269	0.00419328	-0.615126	-3.88984	1.93667	0.00754023	-0.602371	-3.58524	3.18478	0.000639118	-0.592837	-6.458	D0C6G1	Uncharacterized protein
30.7502	30.5578	30.6691	30.937	30.9963	31.0295	31.1833	31.053	31.0925	30.4915	31.0314	30.8497	30.8397	30.602	30.912	30.59			+	Colony B-3/WT			12	12	12	54.2	54.2	54.2	34.556	37524000000	252	0.0220297	0.910716	-0.00741005	-0.0646671	1.93985	0.00743933	0.329621	3.59132	0.35519	0.337671	0.130336	0.824151	D0C6G2	Ornithine carbamoyltransferase
23.8607	24.6105	24.5695	24.6665	24.3296	24.2527	24.6159	24.7382	24.7993	24.342	24.2018	24.5186	24.2014	24.7311	24.4282	24.6244							4	4	4	26.7	26.7	26.7	25.123	417370000	29	0.115985	0.623133	-0.0694757	-0.311965	0.025439	0.901915	-0.012198	-0.0744047	0.0630512	0.805591	-0.0308576	-0.17762	D0C6G3	Transcriptional regulator, TetR family
29.951	29.8416	29.7609	29.8751	30.4556	30.2668	30.169	30.1849	30.0202	30.1381	30.1054	30.1615	30.3824	30.5016	30.4322	30.3003	+	Colony A-3/WT			+	Colony C-3/WT	24	24	24	58.1	58.1	58.1	56.224	23457000000	438	4.09799	0	-0.546958	-9.45197	0.869251	0.0796894	-0.135014	-1.72584	2.89103	0.00176991	-0.297832	-5.67842	D0C6G4	DNA-binding transcriptional regulator NtrC
27.6458	27.4796	27.3205	27.4584	27.9924	27.8489	27.8572	27.909	27.879	27.951	28.0153	27.9581	27.7352	27.8917	28.0814	27.9046	+	Colony A-3/WT					12	12	12	46.1	46.1	46.1	41.61	4517200000	132	2.33684	0.00252857	-0.427126	-4.39275	0.00585687	0.978333	-0.00136662	-0.0175007	0.256127	0.444087	0.047627	0.625842	D0C6G5	Putative nitrogen regulation protein NR(II)
30.7013	30.6563	30.7026	30.6971	30.5835	30.6375	30.5713	30.5584	30.6258	30.4295	30.7523	30.8207	31.1423	31.0093	31.1617	30.9624	+	Colony A-3/WT	+	Colony B-3/WT	+	Colony C-3/WT	19	19	19	62.2	62.2	62.2	50.029	35113000000	400	3.55059	0.000358354	-0.379577	-7.54359	4.04305	0.000244275	-0.481254	-9.24313	2.22678	0.00454623	-0.411842	-4.16184	D0C6G6	Ribosomal protein S12 methylthiotransferase RimO
31.8631	32.0025	31.6948	31.8179	31.7064	31.8185	31.5549	31.8226	31.9759	31.865	31.8619	31.9796	32.144	31.9763	31.9607	31.9604	+	Colony A-3/WT	+	Colony B-3/WT			13	13	13	49.6	49.6	49.6	26.136	75431000000	285	1.11447	0.0386216	-0.165753	-2.13357	1.98988	0.00672551	-0.284735	-3.68778	0.802937	0.105543	-0.0897746	-1.61508	D0C6G7	Uridylate kinase
33.4091	33.3648	33.3027	33.2055	33.1742	33.1968	33.3173	33.3402	33.168	32.9522	33.3219	33.5789	33.6088	33.7845	33.8089	33.7481	+	Colony A-3/WT	+	Colony B-3/WT	+	Colony C-3/WT	15	15	15	69.6	69.6	69.6	20.641	223360000000	337	3.25037	0.000471545	-0.41705	-6.64277	3.64482	0.000176796	-0.48044	-7.84626	1.87294	0.010042	-0.482328	-3.46419	D0C6G8	Ribosome-recycling factor
28.2997	27.9896	28.1786	28.1411	28.2346	28.325	28.2471	28.1616	28.3794	27.982	28.1939	27.977	28.5297	28.5566	28.7061	28.7333	+	Colony A-3/WT	+	Colony B-3/WT	+	Colony C-3/WT	5	5	5	31.2	31.2	31.2	28.697	6418800000	101	2.95231	0.000649916	-0.479176	-5.83488	3.13992	0.000324544	-0.389318	-6.33396	2.41308	0.00318301	-0.498303	-4.55705	D0C6G9	Ditrans,polycis-undecaprenyl-diphosphate synthase ((2E,6E)-farnesyl-diphosphate specific)
29.1666	29.2382	28.9905	29.129	29.0301	28.9996	28.9654	29.0452	28.7191	28.7183	28.914	28.9804	29.5999	29.597	29.6693	29.6995	+	Colony A-3/WT	+	Colony B-3/WT	+	Colony C-3/WT	16	16	16	55.8	55.8	55.8	43.039	11762000000	190	3.9228	0	-0.510322	-8.80018	6.03418	0	-0.631317	-20.316	4.52444	0	-0.808431	-11.223	D0C6H1	1-deoxy-D-xylulose 5-phosphate reductoisomerase
28.8157	28.7027	28.6588	28.7202	28.8714	28.7866	28.9449	28.7221	28.6835	28.3387	28.8948	28.7758	28.6422	28.803	28.9919	28.9034							17	17	17	50.8	50.8	50.8	49.674	8905200000	210	0.647436	0.120666	-0.110789	-1.35172	0.0146394	0.944619	-0.00387335	-0.0433185	0.530152	0.212587	-0.161931	-1.14709	D0C6H2	Zinc metalloprotease
33.7354	33.6694	33.5366	33.6828	33.607	33.6087	33.5122	33.5409	33.528	33.5875	33.6243	33.6121	33.5414	33.612	33.6991	33.57							52	52	52	59	59	59	93.778	249580000000	1043	0.408191	0.238573	0.0504055	0.924965	0.402921	0.262862	-0.0384636	-0.915076	0.168747	0.573993	-0.0176573	-0.436073	D0C6H3	Outer membrane protein assembly factor BamA
32.6776	32.7031	32.4753	32.2474	31.867	32.2845	32.3822	32.0509	32.4932	32.0191	32.7085	32.7775	32.5832	32.7612	32.5392	32.8783			+	Colony B-3/WT			8	8	8	56.3	56.3	56.3	18.71	115430000000	250	0.586684	0.142829	-0.164598	-1.24658	2.08619	0.00567873	-0.544316	-3.87692	0.455497	0.258706	-0.190876	-1.01255	D0C6H4	Outer membrane protein
29.6151	29.6794	29.508	29.7249	29.3778	29.6262	29.5409	29.487	29.7315	30.0663	29.9221	29.8326	29.8797	30.0602	29.8606	29.9235	+	Colony A-3/WT	+	Colony B-3/WT			14	14	14	62.9	62.9	62.9	38.399	17354000000	192	2.43038	0.00197995	-0.299174	-4.59484	3.07248	0.000604651	-0.423082	-6.15096	0.201995	0.515354	-0.0429015	-0.5103	D0C6H5	UDP-3-O-acylglucosamine N-acyltransferase
29.4741	29.54	29.7207	30.1793	30.4005	30.6819	30.3603	30.2304	31.0084	30.8711	30.3678	30.8895	30.6359	31.2827	30.9719	31.0421	+	Colony A-3/WT	+	Colony B-3/WT			11	11	11	59.6	59.6	59.6	17.989	30953000000	166	3.03166	0.000598261	-1.25465	-6.04219	1.86338	0.00885887	-0.564835	-3.44618	0.459819	0.255831	-0.198967	-1.02046	D0C6H6	3-hydroxyacyl-[acyl-carrier-protein] dehydratase FabZ
30.6317	30.5752	30.5069	30.7475	30.5815	30.6468	30.5382	30.7153	30.5785	30.4492	30.5453	30.4886	30.829	30.857	31.1219	30.9244	+	Colony A-3/WT	+	Colony B-3/WT	+	Colony C-3/WT	9	9	9	45.8	45.8	45.8	28.283	33183000000	198	2.05252	0.00464213	-0.31775	-3.81025	2.18881	0.0048446	-0.312643	-4.08381	2.93731	0.00156208	-0.417673	-5.79628	D0C6H7	Acyl-[acyl-carrier-protein]--UDP-N-acetylglucosamine O-acyltransferase
30.9454	31.0927	30.6809	30.7498	30.3956	30.6131	30.6907	30.3283	30.679	30.5671	30.8454	30.8734	31.4956	31.5128	31.4508	31.5793	+	Colony A-3/WT	+	Colony B-3/WT	+	Colony C-3/WT	18	18	18	76.2	76.2	76.2	32.535	40361000000	343	3.23236	0.000465863	-0.642372	-6.59163	4.49749	0	-1.00269	-11.1027	4.23371	0.000290909	-0.76836	-9.98601	D0C6H8	TolA_bind_tri domain-containing protein
25.753	25.9301	25.9847	25.503	26.1727	26.1357	26.4392	26.2122	25.8513	26.0904	26.0237	25.8355	26.1542	25.9577	26.0417	26.2539	+	Colony A-3/WT					7	7	7	48.8	48.8	48.8	18.911	1346900000	40	1.30144	0.0256164	-0.309193	-2.44761	0.715727	0.115001	0.138058	1.4682	0.839437	0.0965531	-0.151652	-1.67612	D0C6H9	Regulatory protein RecX
32.4326	32.3993	32.4044	32.3446	32.7342	32.7447	32.7915	32.8323	32.4714	32.5611	32.6137	32.6352	32.494	32.5598	32.4683	32.573	+	Colony A-3/WT	+	Colony B-3/WT			21	21	21	77.9	77.9	77.9	37.891	123360000000	561	2.20178	0.00344196	-0.128573	-4.11037	3.51226	0.000277635	0.251874	7.42332	0.475828	0.24442	0.0465841	1.0496	D0C6I0	Protein RecA
25.8868	25.8813	25.6826	25.81	26.3383	26.3065	26.0179	26.027	25.7731	26.0467	25.9251	25.8637	26.2673	26.2774	26.3985	26.328	+	Colony A-3/WT			+	Colony C-3/WT	4	4	4	29.9	29.9	29.9	17.265	1344200000	44	3.96152	0	-0.502625	-8.94074	0.783354	0.0965739	-0.145381	-1.58224	3.16961	0.000758808	-0.415638	-6.41585	D0C6I1	Heat shock protein 15
30.651	31.0856	30.9993	31.0068	30.7156	30.7794	30.4074	30.5358	30.1443	30.5815	30.6915	29.6587	30.4358	30.5177	30.3018	30.4121	+	Colony A-3/WT					7	7	7	41.2	41.2	41.2	26.539	30840000000	57	2.55247	0.00174428	0.518867	4.86717	1.0409	0.0523146	0.192718	2.01113	0.25203	0.449269	-0.147811	-0.6173	D0C6I2	HAD hydrolase, family IA, variant 3
24.8295	24.2738	22.4161	24.6661	24.5744	25.6336	25.993	25.6874	25.8203	25.7276	26.3741	26.1841	25.7393	25.7793	25.9881	24.6983	+	Colony A-3/WT					2	2	2	25.6	25.6	25.6	8.9158	1054800000	23	1.27421	0.02717	-1.50491	-2.40151	0.0665271	0.766937	-0.0791683	-0.186803	0.706918	0.13429	0.475235	1.45326	D0C6I4	Uncharacterized protein
27.0227	26.9071	26.6477	26.5871	26.0098	26.9745	26.6599	26.5315	26.6165	26.7288	26.8941	27.1213	25.7573	26.0599	24.5324	26.0794	+	Colony A-3/WT	+	Colony B-3/WT	+	Colony C-3/WT	5	5	5	82.5	82.5	82.5	11.212	1846800000	64	1.68295	0.0109138	1.18394	3.11367	1.18086	0.0371804	0.936705	2.24448	1.74615	0.0137405	1.23297	3.22864	D0C6I5	Uncharacterized protein
23.5885	25.0186	24.5562	24.5769	24.8551	24.4901	24.351	22.9343	25.132	24.4275	25.0721	24.6878	24.4572	24.418	24.2821	24.1978					+	Colony C-3/WT	4	4	4	23	23	23	20.735	472270000	40	0.116408	0.622679	0.0962763	0.312997	0.164147	0.541399	-0.181159	-0.425579	1.49266	0.0233869	0.491054	2.77612	D0C6I6	Toxin-antitoxin system, toxin component, GNAT family
24.3894	23.6736	23.8396	23.6465	23.3801	25.1068	23.5562	25.1398	23.8087	24.035	25.2744	24.4813	24.4197	25.473	23.6842	23.1938							5	5	5	47	47	47	16.922	436500000	21	0.235246	0.412838	-0.305427	-0.581977	0.0525179	0.809182	0.103022	0.149446	0.131809	0.64343	0.207148	0.350096	D0C6I7	Transcriptional regulator, AsnC family
24.9288	23.3042	22.578	23.5957	26.7007	26.5838	26.8474	23.7666	25.7499	23.9905	24.0705	24.0663	26.7201	26.4424	24.3464	26.8898	+	Colony A-3/WT			+	Colony C-3/WT	3	3	3	13.2	13.2	13.2	47.558	1981400000	12	1.75664	0.00851601	-2.498	-3.24787	0.0461726	0.829576	-0.125054	-0.13221	1.17461	0.0456499	-1.6304	-2.23402	D0C6I8	Kynureninase
24.4011	24.2539	22.9837	23.8957	24.5751	24.8373	24.515	24.7194	24.3331	25.3855	23.5781	23.4358	23.9514	22.8014	23.6892	24.8837							6	6	6	33.1	33.1	33.1	41.179	174150000	18	NaN	1	0	NaN	0.980431	0.060571	0.830297	1.91068	NaN	1	0	NaN	D0C6J1	Extracellular serine proteinase
24.4048	25.1195	23.3148	25.0501	25.0975	25.4587	25.4949	25.1376	25.8723	25.5624	25.3414	25.2551	24.1059	24.8769	24.7425	24.883			+	Colony B-3/WT	+	Colony C-3/WT	6	6	6	45.5	45.5	45.5	24.728	577750000	21	0.150152	0.546392	-0.179784	-0.393292	1.64116	0.0141321	0.645086	3.03848	2.00234	0.00854892	0.855745	3.71199	D0C6J3	Abasic site processing protein
32.4995	32.4024	32.4527	32.4693	32.6462	32.6381	32.5246	32.5173	32.4273	32.2091	32.4696	32.4284	31.7595	31.7571	31.7326	31.6701	+	Colony A-3/WT	+	Colony B-3/WT	+	Colony C-3/WT	35	35	35	78.5	78.5	78.5	53.095	103540000000	755	6.56579	0	0.726129	24.9668	6.10636	0	0.85171	20.8938	4.34706	0	0.653762	10.4527	D0C6J4	Quinoprotein glucose dehydrogenase B
28.9676	29.1702	29.2885	29.325	29.8799	29.9604	30.0818	30.1838	30.1724	29.7479	29.8684	29.7291	29.1407	28.9557	28.6863	28.573	+	Colony A-3/WT	+	Colony B-3/WT	+	Colony C-3/WT	7	7	7	46.8	46.8	46.8	17.064	15360000000	98	1.21321	0.031137	0.348922	2.29875	3.74794	0.000196319	1.18759	8.1892	3.13757	0.000738786	1.04056	6.32752	D0C6J5	Universal stress protein
26.6998	26.4494	26.3887	26.9237	26.5038	26.6555	26.378	26.2531	26.5028	27.0213	26.4057	26.1769	25.8955	26.7108	26.4367	26.2658							13	13	13	28.8	28.8	28.8	79.742	1802200000	85	0.658529	0.11763	0.288172	1.37075	0.258123	0.401511	0.120408	0.629991	0.346734	0.344789	0.19943	0.807765	D0C6J6	Diguanylate cyclase (GGDEF) domain protein
26.9427	27.1675	26.6573	26.3922	27.0663	27.5051	26.9516	27.313	27.2674	27.2221	27.2994	26.6458	27.0522	27.3047	27.2665	28.0251	+	Colony A-3/WT					3	3	3	49.3	49.3	49.3	8.7959	2858200000	31	1.21276	0.0311242	-0.622209	-2.29799	0.356892	0.299124	-0.203125	-0.827437	0.535198	0.209464	-0.30344	-1.15605	D0C6J7	Uncharacterized protein
28.0114	28.1228	28.4898	28.0883	27.8547	28.3355	27.966	28.136	28.5413	27.5784	28.1498	27.9315	28.2003	27.9256	28.1065	28.1798							6	6	6	63.6	63.6	63.6	17.842	5508700000	91	0.247366	0.398142	0.075016	0.607538	0.0892706	0.702424	-0.0299788	-0.245573	0.0910887	0.734746	-0.0528102	-0.250178	D0C6J8	Transcriptional regulator, MarR family
28.767	28.6206	28.6837	28.5288	28.4148	28.3027	28.5352	28.2724	28.9676	28.8769	28.8086	28.8972	28.631	28.8065	28.6197	28.8223			+	Colony B-3/WT	+	Colony C-3/WT	8	8	8	23.7	23.7	23.7	60.778	8135600000	105	0.416383	0.233467	-0.0698977	-0.940282	2.2352	0.00454722	-0.338615	-4.17926	1.40816	0.0276452	0.16766	2.62981	D0C6K0	PTS system fructose-specific EIIBBC component
29.1967	29.2369	28.993	29.554	29.0572	29.3754	28.9766	28.9934	29.2955	29.4998	29.1243	29.3708	29.74	29.4533	29.4426	29.4655	+	Colony A-3/WT	+	Colony B-3/WT			10	10	10	55.6	55.6	55.6	34.422	12777000000	173	1.06729	0.0424228	-0.280195	-2.05501	1.95037	0.00727924	-0.424726	-3.61151	0.979007	0.0696752	-0.202753	-1.90832	D0C6K1	Phosphofructokinase
30.9475	30.9781	31.1132	31.0581	31.0981	30.9408	30.9375	30.8624	30.9909	31.1144	31.0449	31.1703	31.1402	31.1705	31.257	31.158	+	Colony A-3/WT	+	Colony B-3/WT			35	35	35	57	57	57	103.94	42996000000	585	1.8564	0.00745674	-0.15715	-3.43307	2.12909	0.00546636	-0.221697	-3.9627	1.12547	0.0510918	-0.101287	-2.15192	D0C6K2	Phosphoenolpyruvate-protein phosphotransferase
25.4918	25.2515	25.013	24.8504	25.9927	25.9645	25.8445	25.7348	24.9916	25.2044	25.6365	25.9907	25.4793	25.4079	25.4505	24.7684			+	Colony B-3/WT			9	9	9	38.8	38.8	38.8	31.82	921770000	47	0.228113	0.423414	-0.124878	-0.566797	1.8253	0.00994083	0.60761	3.37488	0.262511	0.437272	0.17928	0.639091	D0C6K3	Hydrolase, alpha/beta domain protein
30.2908	30.2529	30.2842	30.337	29.7638	29.5728	29.9724	29.9147	30.319	30.0116	30.3633	30.0423	29.7007	29.9457	30.224	30.2103	+	Colony A-3/WT					7	7	7	55.4	55.4	55.4	15.241	21710000000	162	1.13058	0.0369695	0.271046	2.16044	0.675832	0.12621	-0.214272	-1.40034	0.482978	0.239897	0.163877	1.06255	D0C6K6	Uncharacterized protein
29.7344	29.739	29.5156	29.514	29.6813	29.6664	29.9038	29.8598	29.8348	29.6768	29.9203	30.0559	29.882	29.9661	29.9008	29.7872	+	Colony A-3/WT					15	15	15	62.9	62.9	62.9	29.062	17824000000	188	1.88802	0.00709177	-0.258285	-3.49266	0.730488	0.111081	-0.1062	-1.49319	0.0483003	0.845743	-0.0120873	-0.138012	D0C6K8	Methionine aminopeptidase
29.2816	29.3938	29.1834	29.3444	29.3094	29.374	29.2833	29.3275	29.0925	29.2376	29.2204	29.5853	29.0247	29.0793	29.1866	29.1488	+	Colony A-3/WT	+	Colony B-3/WT			14	14	14	65	65	65	33.758	12314000000	235	1.7822	0.00822621	0.190916	3.29493	2.71125	0.0017918	0.213646	5.23689	0.770798	0.11414	0.174094	1.56114	D0C6K9	LysR substrate binding domain protein
27.8581	27.6401	28.1265	27.7875	27.8008	27.2787	27.8899	27.9399	27.9593	27.4647	28.1325	28.1937	28.0903	28.1954	28.0434	28.3834	+	Colony A-3/WT	+	Colony B-3/WT			4	4	4	57	57	57	12.211	4855900000	43	1.37035	0.0223705	-0.32505	-2.56495	1.42123	0.0218427	-0.450754	-2.65231	0.631472	0.160663	-0.240535	-1.32424	D0C6L0	Uncharacterized protein
31.6604	31.7366	31.4792	31.6579	31.7627	31.4921	32.2322	31.4207	32.2522	30.582	31.8821	31.8123	31.6625	32.1133	31.7429	32.082	+	Colony A-3/WT					7	7	7	41.1	41.1	41.1	18.94	70926000000	160	1.08808	0.0407229	-0.266694	-2.08961	0.341976	0.312862	-0.173295	-0.798506	0.294073	0.398726	-0.268059	-0.703562	D0C6L1	Monothiol glutaredoxin, Grx4 family (Fragment)
30.8217	30.8677	30.7626	30.7451	30.9367	31.1153	31.0045	30.8451	30.9921	31.0097	31.1647	31.0764	31.5499	31.518	31.4893	31.5121	+	Colony A-3/WT	+	Colony B-3/WT	+	Colony C-3/WT	20	20	20	64.9	64.9	64.9	43.065	45293000000	444	6.39401	0	-0.718071	-23.3601	4.05742	0	-0.541914	-9.29733	4.50082	0	-0.456586	-11.1176	D0C6L2	Acetylornithine aminotransferase
31.6485	31.8856	31.8483	31.7933	31.9222	32.1739	32.0102	32.1251	32.2138	31.9851	31.9955	31.6322	31.8854	31.9131	31.7787	31.6199			+	Colony B-3/WT			11	11	11	88.8	88.8	88.8	15.662	77734000000	289	0.0214124	0.912789	-0.0053091	-0.0628967	1.59647	0.0162201	0.258568	2.95874	0.529036	0.213197	0.157378	1.14511	D0C6L3	CBS domain protein
29.806	29.8172	29.9568	29.8946	30.3663	30.5458	30.5933	30.4114	30.7828	30.2537	30.5966	30.3073	29.7404	29.3613	29.541	29.3471	+	Colony A-3/WT	+	Colony B-3/WT	+	Colony C-3/WT	8	8	8	62.2	62.2	62.2	13.87	22754000000	159	2.02604	0.00479919	0.371212	3.75823	4.02986	0.000238806	0.981736	9.19358	3.15382	0.000748663	0.987627	6.37219	D0C6L6	Uncharacterized protein
24.5259	24.8974	24.9344	25.2451	24.5129	24.1338	24.7702	24.5615	24.8105	24.0685	24.4669	24.6208	23.8582	24.7281	25.507	22.6619							2	2	2	19.4	19.4	19.4	12.766	465810000	22	0.52278	0.171658	0.711905	1.13398	0.192608	0.495532	0.305773	0.489618	0.188533	0.539333	0.302905	0.480576	D0C6L7	Uncharacterized protein
30.433	30.3741	30.3838	30.434	30.4461	30.4014	30.3213	30.332	30.6338	30.5396	30.5641	30.5633	30.729	30.8218	30.9149	30.6903	+	Colony A-3/WT	+	Colony B-3/WT	+	Colony C-3/WT	19	19	19	59	59	59	39.919	30179000000	336	3.46145	0.00033713	-0.382759	-7.26632	3.40673	0.000257143	-0.413781	-7.1003	2.12017	0.0061319	-0.213772	-3.94479	D0C6L8	Signal recognition particle receptor FtsY
30.9219	31.2017	30.9925	30.9531	31.3015	31.1585	31.1816	31.1773	31.2785	31.1232	31.3707	31.1442	30.5669	30.6962	30.8056	30.6534	+	Colony A-3/WT	+	Colony B-3/WT	+	Colony C-3/WT	9	9	9	42.9	42.9	42.9	21.968	42707000000	187	2.24212	0.00297611	0.336794	4.19359	3.92994	0.000222997	0.524198	8.82598	3.42663	0.000470588	0.548633	7.1603	D0C6L9	Nitroreductase family protein
24.6046	24.5658	24.4195	24.8227	24.7728	24.2413	24.8507	24.4413	22.7791	24.5764	24.7063	24.3853	24.7923	24.6528	24.8994	24.6914							4	4	4	30	30	30	24.237	413160000	23	0.768936	0.0874116	-0.155803	-1.55801	0.555705	0.171309	-0.182453	-1.19229	0.693413	0.13844	-0.647185	-1.43031	D0C6M0	Uncharacterized protein
30.2172	30.1582	29.9454	29.9924	30.3318	30.3419	30.3032	30.0354	30.3053	30.4416	30.239	30.2864	29.6962	29.9596	30.1371	29.86			+	Colony B-3/WT	+	Colony C-3/WT	5	5	5	12.6	12.6	12.6	41.571	22658000000	127	0.712337	0.100716	0.165088	1.46245	1.55636	0.0170535	0.339854	2.88778	2.13188	0.00611096	0.404847	3.96834	D0C6M3	Cytochrome d ubiquinol oxidase, subunit II
32.6648	32.6076	32.5986	32.7124	32.4014	32.4347	32.3084	32.2099	32.4516	32.797	32.5387	32.3264	32.0967	32.3253	32.1862	32.0353	+	Colony A-3/WT	+	Colony B-3/WT	+	Colony C-3/WT	19	19	19	37.6	37.6	37.6	58.789	112880000000	502	3.40554	0.000326711	0.484982	7.09673	1.15529	0.0393499	0.177749	2.20172	1.68662	0.0160294	0.36755	3.12031	D0C6M4	Cytochrome D ubiquinol oxidase, subunit I
25.3522	22.3823	27.2514	27.2895	24.8572	25.1685	25.0528	24.1976	25.2967	24.354	24.7011	25.4709	25.1601	23.6846	24.472	23.4372							1	1	1	29.7	29.7	29.7	7.3035	923970000	16	0.521806	0.172189	1.38036	1.13225	0.680264	0.125108	0.630564	1.4079	0.813178	0.103152	0.767214	1.63222	D0C6M5	Uncharacterized protein
25.0613	25.1717	25.1616	25.1238	25.067	24.6557	25.3876	23.9949	25.7496	25.5277	25.7279	25.5781	25.2847	25.753	25.0014	25.0303							2	2	2	14.4	14.4	14.4	23.094	765760000	14	0.334517	0.303227	-0.137768	-0.783932	0.684113	0.124388	-0.491071	-1.41447	1.0793	0.0566273	0.378445	2.07499	D0C6M6	Uncharacterized protein
26.773	26.9908	26.9596	26.8845	26.3159	26.5065	26.2676	26.191	26.5454	26.0734	26.5422	26.447	26.7004	26.7107	26.6807	26.8968	+	Colony A-3/WT	+	Colony B-3/WT	+	Colony C-3/WT	2	2	2	25.5	25.5	25.5	11.614	1941100000	35	1.16524	0.0340192	0.154818	2.21835	2.64798	0.00187117	-0.426908	-5.08737	1.51457	0.0224383	-0.345165	-2.81438	D0C6M7	Rieske [2Fe-2S] domain protein
29.8857	29.7766	29.5626	29.6585	29.5955	29.526	29.7721	29.5394	29.4863	29.5607	29.5682	29.8399	30.1226	30.1158	30.1994	30.186	+	Colony A-3/WT	+	Colony B-3/WT	+	Colony C-3/WT	9	9	9	42	42	42	36.496	17838000000	195	2.98658	0.000660988	-0.435086	-5.92374	3.98906	0.000232727	-0.547718	-9.0419	3.28189	0.000557576	-0.542196	-6.73306	D0C6M8	Kinase, PfkB family
30.0089	30.0381	29.9349	30.0774	30.4039	30.5911	30.4695	30.4421	30.4636	30.5623	30.5421	30.3799	30.5692	30.4337	30.5626	30.6102	+	Colony A-3/WT					32	32	31	62	62	60.7	77.77	27152000000	492	4.44607	0	-0.529064	-10.8765	0.564985	0.167465	-0.0672631	-1.20861	0.453118	0.260541	-0.0569196	-1.00819	D0C6M9	TonB-dependent siderophore receptor
32.0292	32.0379	32.0632	32.143	32.1013	32.1445	32.1003	32.0977	32.0315	32.1785	32.09	32.1256	32.0851	32.071	32.0968	32.0359			+	Colony B-3/WT			47	47	47	53.3	53.3	53.3	110.18	87567000000	834	0.0461347	0.826	-0.00384331	-0.132107	1.17707	0.0375309	0.0387564	2.23814	0.458827	0.256176	0.0341997	1.01864	D0C6N0	Peptidase M16 inactive domain protein
29.8468	29.9979	29.6929	29.9333	29.3766	29.4064	29.5476	29.2217	29.7708	29.6782	29.8737	29.849	29.6232	29.5424	29.7522	29.5259	+	Colony A-3/WT	+	Colony B-3/WT	+	Colony C-3/WT	21	21	21	69.5	69.5	69.5	43.273	16218000000	262	1.65547	0.0114646	0.256816	3.06415	1.41297	0.0221743	-0.222808	-2.63808	1.43726	0.0261084	0.182024	2.67997	D0C6N1	Phospholipase A1
28.4254	28.5243	28.3593	28.3557	28.2964	28.0789	28.2537	28.4358	28.5637	28.2459	28.2631	28.4746	28.1244	28.0986	28.34	28.1091	+	Colony A-3/WT			+	Colony C-3/WT	7	7	7	39.8	39.8	39.8	24.177	6294100000	172	1.92174	0.00643678	0.248161	3.55672	0.476627	0.213128	0.0981517	1.05105	1.18161	0.0451795	0.218791	2.24574	D0C6N3	Putative Ktr system potassium uptake protein A
30.6555	30.6064	30.7231	30.7278	30.4013	30.5286	30.5175	30.4834	30.8549	30.805	30.762	30.7573	30.9828	31.1276	30.9646	30.9753	+	Colony A-3/WT	+	Colony B-3/WT	+	Colony C-3/WT	29	29	29	70.5	70.5	70.5	56.695	34753000000	417	3.34983	0.000492569	-0.334409	-6.93097	4.47944	0	-0.529894	-11.0228	2.55408	0.00269258	-0.217773	-4.87082	D0C6N4	L-threonine dehydratase
31.1198	31.1642	30.7988	30.9027	30.6206	30.703	30.8176	30.5621	30.8903	30.555	30.7869	30.8982	31.3473	31.3086	31.3943	31.3409	+	Colony A-3/WT	+	Colony B-3/WT	+	Colony C-3/WT	11	11	11	60.5	60.5	60.5	23.734	40626000000	185	2.12273	0.00386281	-0.35141	-3.94994	4.59747	0	-0.671943	-11.5551	3.33902	0.000444444	-0.565182	-6.89917	D0C6N5	Ribose-5-phosphate isomerase A
27.3006	27.2118	27.1836	27.1566	26.7314	26.8046	26.5482	26.7819	27.6241	27.3627	27.4675	27.1193	27.0987	27.3482	27.2333	27.5153			+	Colony B-3/WT			14	14	14	47.8	47.8	47.8	55.201	2905100000	101	0.402928	0.242881	-0.0857525	-0.91509	2.82184	0.00115663	-0.582345	-5.50548	0.284898	0.407767	0.0945091	0.684989	D0C6N7	Uncharacterized protein
30.3348	30.2177	30.1664	30.2725	30.492	30.2838	30.4723	30.4596	30.3746	30.3977	30.4892	30.7209	30.4708	30.6034	30.6515	30.3798	+	Colony A-3/WT					13	13	13	74.7	74.7	74.7	24.498	27945000000	237	2.08723	0.00445417	-0.278521	-3.87898	0.597983	0.154176	-0.0994291	-1.26626	0.113571	0.681977	-0.0307531	-0.306074	D0C6N9	N-acetyl-gamma-glutamyl-phosphate reductase
30.5067	30.4735	30.4631	30.3856	30.3491	30.3859	30.362	30.3172	30.3555	30.6911	30.5699	30.5892	30.3698	30.5884	30.4991	30.3772							15	15	15	63.5	63.5	63.5	29.199	28021000000	280	0.00813429	0.96509	-0.00141525	-0.0242437	0.994148	0.0589887	-0.105105	-1.93346	0.479327	0.241984	0.0927944	1.05594	D0C6P0	Uncharacterized protein
32.6295	32.5434	32.598	32.6295	32.8913	32.896	32.8441	32.6713	32.9808	33.0588	32.7673	32.8937	32.5685	32.6962	32.532	32.5453			+	Colony B-3/WT	+	Colony C-3/WT	50	50	50	61.2	61.2	61.2	84.126	138450000000	926	0.127931	0.595027	0.0145864	0.340828	1.99799	0.00656311	0.240158	3.70353	2.45772	0.00291092	0.339626	4.65495	D0C6P2	ATP-dependent Clp protease ATP-binding subunit ClpA
29.3085	28.833	28.2712	28.7167	25.3794	24.0613	24.6257	24.3805	24.2467	24.9619	23.9575	24.6714	25.474	25.7729	25.8941	26.3444	+	Colony A-3/WT	+	Colony B-3/WT	+	Colony C-3/WT	14	14	14	52.1	52.1	52.1	38.829	2538400000	92	4.33883	0	2.91104	10.4182	2.03319	0.0062674	-1.25958	-3.77224	2.57752	0.00247585	-1.41194	-4.92431	D0C6P4	Phospho-2-dehydro-3-deoxyheptonate aldolase
25.2766	25.0915	25.2613	25.5669	25.5338	24.6679	24.2467	24.8958	24.5133	24.8624	24.9006	24.7849	24.1359	25.4551	25.2202	23.2423							6	6	6	30.8	30.8	30.8	35.653	456150000	24	0.738739	0.0943687	0.785698	1.50713	0.224069	0.449783	0.322673	0.558146	0.19057	0.535996	0.251917	0.485102	D0C6P5	Hydrolase, alpha/beta domain protein
25.4369	25.4494	25.444	25.0085	25.67	25.0472	25.7818	25.8199	25.5256	24.6634	25.4883	25.6048	25.0449	25.6133	25.187	25.3335							6	6	6	48.8	48.8	48.8	15.336	858630000	50	0.0892488	0.690584	0.0400276	0.245518	0.623872	0.14408	0.285062	1.31113	0.0354999	0.883473	0.0258551	0.102749	D0C6P6	Vir_act_alpha_C domain-containing protein
29.1222	29.0713	29.0001	29.1845	29.4277	29.5051	29.3313	29.2962	29.4777	29.6181	29.6283	29.5999	29.2026	29.4057	29.4689	29.2809	+	Colony A-3/WT			+	Colony C-3/WT	33	33	32	58	58	58	73.715	13264000000	376	1.84865	0.00747359	-0.244994	-3.41853	0.273071	0.383733	0.0505595	0.660847	1.87883	0.0100258	0.241498	3.47529	D0C6P7	2,4-dienoyl-CoA reductase (NADPH)
27.121	27.0122	27.103	27.1592	27.2979	27.3495	27.2526	27.1373	26.966	26.9734	26.7829	26.7883	27.6916	27.493	27.6771	27.5402	+	Colony A-3/WT	+	Colony B-3/WT	+	Colony C-3/WT	12	12	12	50.3	50.3	50.3	41.934	3143100000	119	3.86162	0	-0.501622	-8.58206	2.64945	0.00187404	-0.341159	-5.09081	4.22587	0.000287425	-0.722816	-9.95445	D0C6Q0	Hydrolase_4 domain-containing protein
29.9481	29.8393	29.7815	30.2084	29.7821	30.4117	29.8126	29.9473	30.0856	30.8513	29.7709	29.901	30.5419	30.6773	30.4806	30.3593	+	Colony A-3/WT	+	Colony B-3/WT			9	9	9	55.7	55.7	55.7	18.176	23392000000	221	2.58595	0.00145703	-0.570469	-4.94363	1.78066	0.0112246	-0.526369	-3.29208	0.702909	0.135864	-0.362599	-1.44645	D0C6Q2	Uncharacterized protein
32.7266	32.6297	32.6604	32.7067	32.7489	32.7562	32.7211	32.7118	32.6953	32.6328	32.8215	32.7361	32.7595	32.7803	32.8098	32.6966	+	Colony A-3/WT					28	28	28	71.7	71.7	71.7	60.985	134810000000	605	1.32049	0.0247485	-0.0806904	-2.47995	0.464697	0.220262	-0.0270462	-1.02936	0.377728	0.315671	-0.0401211	-0.867401	D0C6Q3	CTP synthase
31.8464	31.8102	31.9166	31.9095	31.8616	31.8331	31.748	31.8085	31.9077	31.666	31.9176	31.8905	31.9473	32.1075	32.12	32.0492	+	Colony A-3/WT	+	Colony B-3/WT	+	Colony C-3/WT	22	22	22	81.4	81.4	81.4	31.549	76217000000	453	2.12139	0.00384632	-0.185358	-3.94725	2.72238	0.00180892	-0.243206	-5.26349	1.58079	0.0195833	-0.210533	-2.93094	D0C6Q4	2-dehydro-3-deoxyphosphooctonate aldolase
34.1591	34.11	33.9278	34.0207	33.7943	33.8124	33.7293	33.7106	34.0456	33.9037	33.9184	33.9609	34.429	34.3714	34.599	34.5848	+	Colony A-3/WT	+	Colony B-3/WT	+	Colony C-3/WT	23	23	23	74.7	74.7	74.7	46.494	355420000000	804	2.93639	0.000640264	-0.441629	-5.79392	4.66889	0	-0.734372	-11.8886	3.77772	0.000201681	-0.538847	-8.29058	D0C6Q5	Enolase
27.0437	26.9006	26.9557	26.9164	26.7784	27.1002	26.4679	27.0007	27.4462	26.1528	26.7409	27.0556	27.2752	27.4703	27.2619	27.1806	+	Colony A-3/WT	+	Colony B-3/WT			4	4	4	34.1	34.1	34.1	14.703	2580400000	65	2.58791	0.00146101	-0.34289	-4.94812	1.62375	0.0149805	-0.460185	-3.00733	0.794068	0.10799	-0.448133	-1.60021	D0C6Q7	Cell division protein FtsB
27.0255	27.1802	26.9811	27.363	27.1043	27.0851	27.0975	26.7517	26.9525	27.2325	26.6775	27.0937	26.7679	27.1003	26.5356	27.1046							11	11	11	57.6	57.6	57.6	26.584	2681600000	83	0.790832	0.0827256	0.260353	1.59479	0.349449	0.305588	0.13256	0.813036	0.25051	0.450983	0.111948	0.614123	D0C6Q8	2-C-methyl-D-erythritol 4-phosphate cytidylyltransferase
27.1224	27.2293	27.1116	26.9437	26.9799	27.3218	27.2975	27.1597	26.9242	26.9261	26.9546	26.9974	26.7369	26.7941	26.8633	26.8377	+	Colony A-3/WT	+	Colony B-3/WT	+	Colony C-3/WT	9	9	9	49.2	49.2	49.2	20.563	2590300000	92	2.39015	0.00223902	0.293742	4.50725	2.42589	0.00337127	0.381722	4.58502	2.33302	0.00382769	0.142605	4.38462	D0C6V3;D0C6Q9	3-oxoadipate CoA-transferase subunit A (Fragment);3-oxoadipate CoA-transferase subunit A (Fragment)
28.1236	27.7282	27.9765	28.1312	27.7255	27.9047	28.1902	27.9107	28.0364	27.6916	27.8697	28.0626	27.5046	27.6954	28.0564	27.856							18	18	1	61.5	61.5	3.7	42.498	4888000000	232	0.679947	0.11042	0.211755	1.40736	0.459848	0.223385	0.154679	1.02051	0.417315	0.285244	0.136954	0.942019	D0C6R1	Beta-ketoadipyl CoA thiolase
24.1602	24.2698	23.0174	24.1663	24.3368	24.4086	24.298	24.2691	24.2109	24.0628	24.3303	24.1984	23.7858	24.1618	24.5057	24.0836							3	3	3	10.9	10.9	10.9	49.287	370640000	21	0.290714	0.348762	-0.230835	-0.69678	0.60813	0.150561	0.193889	1.28388	0.161958	0.587543	0.0663462	0.420565	D0C6R2	3-carboxy-cis,cis-muconate cycloisomerase
26.0178	25.9979	26.0079	26.1836	26.4748	26.3757	26.4548	26.5568	25.9308	26.1354	25.9527	25.9032	25.5927	25.824	25.8415	25.9802	+	Colony A-3/WT	+	Colony B-3/WT			8	8	8	56.7	56.7	56.7	28.891	1339200000	90	1.41558	0.0200832	0.242162	2.64258	3.50825	0.000276215	0.655911	7.41081	0.901918	0.0821633	0.170913	1.78022	D0C6R3	3-oxoadipate enol-lactonase
24.1315	23.3677	23.312	24.2397	22.6157	24.3242	24.1757	23.9396	22.8156	25.0289	23.9688	25.7747	23.7472	23.399	23.7527	23.4839							1	1	1	13.1	13.1	13.1	15.662	156080000	30	0.262204	0.380628	0.167034	0.638454	0.161302	0.546856	0.168125	0.41906	0.578068	0.184965	0.801309	1.23153	D0C6R5	4-carboxymuconolactone decarboxylase
23.9863	23.8248	23.7944	23.8955	24.2753	25.0595	24.2257	24.1248	24.9694	22.8868	23.9045	25.1799	23.7478	24.0259	24.3939	24.3177							3	3	3	12	12	12	27.609	282650000	20	0.794642	0.0820378	-0.24605	-1.60118	0.531963	0.182253	0.300016	1.15031	0.0743499	0.775853	0.113847	0.207269	D0C6R6	Protocatechuate 3,4-dioxygenase, beta subunit
24.6108	24.501	23.1367	24.1402	24.1435	24.1801	23.2525	23.7355	22.8226	24.332	24.0217	24.3106	24.2162	24.4409	24.6869	25.0089			+	Colony B-3/WT			3	3	3	29.2	29.2	29.2	23.522	331010000	21	0.620553	0.130625	-0.491066	-1.3054	1.48391	0.0196474	-0.760335	-2.76088	0.921569	0.0799139	-0.716511	-1.8129	D0C6R7	Protocatechuate 3,4-dioxygenase, alpha subunit
24.7819	25.274	24.6413	24.5667	24.357	24.7641	24.6416	24.57	24.342	24.6405	24.8746	24.2696	24.2729	24.8402	24.9611	24.8006							6	6	6	34.7	34.7	34.7	30.334	492520000	57	0.17118	0.509585	0.0972929	0.441599	0.330162	0.323308	-0.135494	-0.775388	0.397323	0.299657	-0.187021	-0.90454	D0C6R8	3-dehydroquinate dehydratase
25.7478	25.5833	25.705	25.2142	25.0638	24.9933	24.8852	24.8809	23.7883	23.1498	25.0376	25.376	24.6339	25.3663	25.6357	25.5397							6	6	6	19	19	19	51.732	609580000	32	0.472839	0.198647	0.268662	1.04418	0.712205	0.116129	-0.338131	-1.46223	0.840058	0.0963877	-0.95598	-1.67715	D0C6R9	3-dehydroshikimate dehydratase
27.58	27.494	27.2995	27.2483	27.1684	26.955	27.2308	26.727	27.4812	27.5709	27.2967	27.3983	27.8118	27.9017	27.8545	27.9369	+	Colony A-3/WT	+	Colony B-3/WT	+	Colony C-3/WT	14	14	14	27.2	27.2	27.2	89.528	3402900000	90	2.88109	0.000818035	-0.470737	-5.65334	3.4687	0.000267327	-0.855886	-7.28855	3.30704	0.000439024	-0.439444	-6.80578	D0C6S1	Quinate/shikimate dehydrogenase (Pyrroloquinoline-quinone)
31.4501	31.5384	31.3428	31.7998	31.7524	31.7291	31.899	31.8673	31.8568	31.4567	31.9223	31.5744	32.0414	31.7423	31.7912	31.4522							8	8	8	62.3	62.3	62.3	17.778	67248000000	158	0.700551	0.104175	-0.224004	-1.44244	0.166755	0.537162	0.0551791	0.431536	0.123374	0.660542	-0.0542121	-0.329875	D0C6S2	Uncharacterized protein
26.9166	26.8115	26.8167	26.8868	26.7184	26.4109	26.6779	26.4325	26.8834	26.5988	26.7889	26.6444	26.4607	26.4629	26.9708	26.4485	+	Colony A-3/WT					8	8	8	41.3	41.3	41.3	32.83	2179400000	72	1.08075	0.0411805	0.272169	2.0774	0.0603096	0.786508	-0.0258012	-0.170338	0.444854	0.267041	0.143158	0.993022	D0C6S5	Metallo-beta-lactamase domain protein
25.1216	25.2379	25.2581	25.7818	25.4341	25.2175	25.4345	25.4442	25.4999	25.7287	25.6075	25.4895	25.4855	25.7657	25.693	25.5188			+	Colony B-3/WT			5	5	5	26.3	26.3	26.3	30.751	869510000	41	0.819345	0.0768546	-0.265874	-1.64254	1.43388	0.0212268	-0.233136	-2.67413	0.149364	0.611207	-0.0343266	-0.391457	D0C6S6	p-hydroxybenzoate hydroxylase transcriptional activator
23.9865	24.1455	23.8538	23.8075	24.4983	24.3729	24.6192	24.1321	24.3792	24.6407	23.0959	23.292	24.9772	24.3303	24.5713	24.0907	+	Colony A-3/WT					4	4	4	21.2	21.2	21.2	35.457	393170000	37	1.43179	0.0194184	-0.544021	-2.67053	0.153824	0.560869	-0.0867224	-0.401819	0.72908	0.126712	-0.640394	-1.4908	D0C6S7	Transcriptional regulator, LysR family
26.6988	26.3073	26.3729	26.7085	26.5639	26.52	26.5104	26.3811	26.5772	26.1322	26.407	26.5163	26.3322	26.578	26.819	26.6599							13	13	13	47.2	47.2	47.2	45.839	1821200000	114	0.203759	0.457362	-0.075397	-0.514163	0.42146	0.248569	-0.103411	-0.949741	0.638814	0.158266	-0.189096	-1.33689	D0C6S8	Acyl-CoA dehydrogenase, C-terminal domain protein
28.5242	28.5407	28.1716	28.4265	28.7734	28.7429	28.7245	28.5458	28.7215	28.8605	28.4787	28.5989	28.6718	28.6686	28.8775	28.626	+	Colony A-3/WT					14	14	14	41.3	41.3	41.3	43.272	7951000000	148	1.55645	0.0144736	-0.295213	-2.88794	0.0668365	0.766386	-0.0143132	-0.187618	0.180638	0.552194	-0.0460544	-0.462939	D0C6S9	Phosphotransferase enzyme family
26.3503	26.2905	26.3061	26.3249	26.3005	26.4504	26.347	26.2051	26.4247	26.1089	26.2664	26.2149	26.4063	26.1129	26.8264	26.3218							8	8	8	38.8	38.8	38.8	26.707	1656700000	62	0.271752	0.369521	-0.0989413	-0.65814	0.23238	0.436917	-0.091116	-0.57589	0.447182	0.265079	-0.163141	-0.997303	D0C6T0	Phosphoglycerate mutase family protein
27.9906	28.2362	28.0248	28.0553	28.2405	27.9583	28.0853	28.069	28.1823	28.3403	28.2973	28.3382	28.0915	28.322	28.4859	28.0099							13	13	13	62.8	62.8	62.8	27.018	5823600000	112	0.581944	0.14489	-0.150597	-1.23831	0.520105	0.188474	-0.139044	-1.12921	0.216616	0.494637	0.0622039	0.542109	D0C6T1	Oxidoreductase, short chain dehydrogenase/reductase family protein
27.1263	27.3565	27.4092	26.7922	27.1703	27.4075	27.3381	27.7025	27.2807	27.311	27.3816	27.4926	27.7328	27.709	27.7519	27.8018	+	Colony A-3/WT	+	Colony B-3/WT	+	Colony C-3/WT	5	5	5	43.1	43.1	43.1	19.656	3475400000	83	2.18417	0.00348616	-0.577811	-4.07433	1.64852	0.0141955	-0.344281	-3.05167	3.53521	0.000371429	-0.382391	-7.49515	D0C6T5	Transcriptional regulator, MarR family
26.4473	26.4318	26.3031	26.5198	26.3348	26.1687	26.5404	26.2438	26.5287	26.2736	26.3024	26.3769	23.2773	26.084	25.0326	23.9468	+	Colony A-3/WT	+	Colony B-3/WT	+	Colony C-3/WT	10	10	10	35.2	35.2	35.2	39.653	1474500000	85	1.60614	0.0125391	1.84033	2.97594	1.50196	0.0190823	1.73676	2.79234	1.55321	0.0209688	1.78524	2.88223	D0C6T6	Amidase
26.1131	25.6123	25.0144	25.209	24.4359	24.7028	24.9457	24.5986	25.318	24.6932	24.4928	24.9004	24.6144	23.5717	24.5545	24.3857	+	Colony A-3/WT					2	2	2	25.2	25.2	25.2	13.372	528890000	28	1.90202	0.00682398	1.20561	3.51919	0.718874	0.114137	0.389163	1.47353	0.976309	0.0699844	0.56948	1.90384	D0C6T8	Uncharacterized protein
22.992	25.3076	25.9882	25.9712	25.5772	25.9347	25.8443	25.5054	26.1827	25.4463	25.9797	25.9367	23.4982	24.6063	24.2485	24.7991			+	Colony B-3/WT	+	Colony C-3/WT	6	6	6	24.1	24.1	24.1	49.736	842450000	33	0.457207	0.207666	0.776725	1.01568	2.46945	0.00291262	1.42736	4.6809	2.56368	0.00260746	1.59832	4.89269	D0C6U0	Rieske [2Fe-2S] domain protein
25.5444	26.0829	26.3862	26.1246	25.8706	25.7341	25.7827	25.621	25.8213	26.3896	25.555	25.9454	25.7395	25.4604	25.9053	25.5933							6	6	6	46	46	46	18.919	1174300000	47	0.90873	0.0617679	0.3599	1.79155	0.297932	0.356963	0.0774846	0.711336	0.602583	0.174279	0.253183	1.27426	D0C6U1	Ring hydroxylating beta subunit
27.8743	28.0312	27.7087	27.849	27.6218	27.4245	27.6768	27.2503	27.8424	27.8533	27.7547	27.7297	26.5509	26.4117	26.5377	26.3007	+	Colony A-3/WT	+	Colony B-3/WT	+	Colony C-3/WT	9	9	9	49.5	49.5	49.5	30.038	3585600000	78	5.42047	0	1.41551	15.9915	4.02116	0.000237037	1.04312	9.16104	6.01987	0	1.34475	20.2033	D0C6U2	Oxidoreductase, short chain dehydrogenase/reductase family protein
23.7817	23.3558	23.6357	24.3102	23.2243	23.4378	24.4762	23.7891	22.7276	22.8299	23.4837	22.7636	23.0915	23.9434	24.6701	25.0455					+	Colony C-3/WT	2	2	2	7.3	7.3	7.3	34.928	78436000	17	0.382665	0.260311	-0.416777	-0.876798	0.390819	0.271375	-0.455781	-0.89226	1.41963	0.0268988	-1.23644	-2.64955	D0C6U3	2Fe-2S iron-sulfur cluster binding domain protein
27.5464	27.7399	27.5062	27.6075	27.3848	26.8565	27.0283	27.2071	27.169	27.234	27.1205	27.0624	27.1336	27.1944	27.1358	27.1778	+	Colony A-3/WT					9	9	9	56.7	56.7	56.7	29.682	3096400000	64	3.76533	0.000123596	0.439581	8.24826	0.135442	0.597423	-0.0412083	-0.358734	0.133088	0.641248	-0.0139365	-0.353141	D0C6V0	3-oxoadipate enol-lactonase
28.9912	29.2179	28.965	29.2241	28.2497	28.5795	28.2221	28.2405	29.0782	29.0685	29.2651	29.2686	28.2214	28.2211	27.8979	28.0564	+	Colony A-3/WT			+	Colony C-3/WT	14	14	14	66	66	66	33.493	8504600000	206	4.12479	0	1.00039	9.55534	0.995676	0.0588965	0.223778	1.936	4.51972	0	1.07089	11.2019	D0C6V4	Catechol 1,2-dioxygenase
22.7709	23.9899	23.1892	24.3555	22.9855	22.952	22.9614	24.4138	22.803	23.5882	23.5062	23.2233	25.1852	24.2859	23.7484	24.3087			+	Colony B-3/WT	+	Colony C-3/WT	4	4	4	16.6	16.6	16.6	40.194	106390000	22	0.864736	0.0682256	-0.805636	-1.71832	1.184	0.0370746	-1.05386	-2.24975	1.72114	0.0147065	-1.10187	-3.18296	D0C6V6	Muconate cycloisomerase 1
28.1913	28.2387	28.1742	28.0969	28.3835	28.355	28.3971	28.2376	28.4389	28.3024	28.3476	28.3765	28.4534	28.3699	28.4128	28.6183	+	Colony A-3/WT					15	15	15	51	51	51	34.373	6385100000	160	2.46264	0.00186531	-0.288311	-4.66584	0.938831	0.0668314	-0.1203	-1.84159	0.784623	0.110642	-0.0972409	-1.58437	D0C6V7	HTH-type transcriptional regulator CatM
27.6206	27.5779	27.5492	27.6957	27.3261	27.4563	27.3895	27.4372	27.7489	28.3219	27.6744	27.9221	28.0749	27.6969	28.0732	27.786	+	Colony A-3/WT	+	Colony B-3/WT			8	8	8	42.8	42.8	42.8	29.595	4274300000	162	1.55687	0.01443	-0.296895	-2.88868	2.5925	0.00211343	-0.505451	-4.95868	0.0176156	0.940039	0.00906944	0.0519561	D0C6V8	Uncharacterized protein
26.1467	26.3751	25.9402	25.7649	26.6252	26.3046	26.2544	26.3606	26.243	25.7844	26.4541	26.0258	26.1836	26.407	26.1529	26.3575							8	8	8	34.9	34.9	34.9	27.065	1445100000	56	0.732721	0.0957401	-0.218514	-1.49696	0.486314	0.208357	0.110928	1.06858	0.419253	0.284286	-0.148417	-0.945633	D0C6V9	FCD domain protein
28.3375	28.1168	28.0328	28.1496	28.3266	28.5008	28.4399	28.4221	28.6722	28.723	28.4552	28.5899	28.6334	28.7345	28.744	28.5615	+	Colony A-3/WT	+	Colony B-3/WT			24	24	24	63.3	63.3	63.3	62.541	7555200000	260	3.21936	0.000458498	-0.509162	-6.55492	2.31683	0.00385335	-0.24599	-4.35023	0.34237	0.348311	-0.0582576	-0.799273	D0C6W0	Putative dihydroxy-acid dehydratase
24.6107	24.2487	22.7509	24.0512	24.0778	23.9862	24.0951	24.2299	24.5751	24.2907	24.3507	24.5881	23.9288	24.1425	24.3075	24.2859					+	Colony C-3/WT	1	1	1	3.2	3.2	3.2	48.392	370590000	19	0.246315	0.39928	-0.250809	-0.605333	0.284825	0.371298	-0.0689211	-0.684842	1.30826	0.0335883	0.285008	2.45918	D0C6W1	Transporter, major facilitator family protein
29.8955	29.8648	29.8891	29.7871	29.6366	29.7892	29.7123	29.5776	29.8992	29.9824	29.9195	29.9519	30.0333	30.0309	30.1317	29.877	+	Colony A-3/WT	+	Colony B-3/WT			14	14	14	65.1	65.1	65.1	37.27	18992000000	249	1.46826	0.0175696	-0.159113	-2.73366	2.5482	0.00223837	-0.339303	-4.85749	0.697012	0.137645	-0.0799904	-1.43643	D0C6W2	Uncharacterized protein
31.6226	31.4695	31.6515	31.5222	31.312	31.2641	31.3929	31.3679	31.5017	31.49	31.4957	31.3779	31.6751	31.5766	31.5458	31.4867			+	Colony B-3/WT			26	26	10	68.5	68.5	27.5	56.081	57701000000	459	0.0272512	0.892331	-0.00461197	-0.0795527	2.54569	0.00222222	-0.236814	-4.85178	1.11096	0.0526888	-0.104739	-2.12772	D0C6W3	NADP-dependent fatty aldehyde dehydrogenase
23.3512	23.8122	23.896	23.7697	24.2679	24.3446	24.3405	23.518	24.7094	23.7254	25.2512	24.1818	24.0668	24.2215	24.2135	24.1478	+	Colony A-3/WT					3	3	3	14.1	14.1	14.1	33.696	275240000	18	1.93975	0.00637984	-0.455113	-3.59114	0.0788773	0.729052	-0.0446444	-0.21899	0.404516	0.293751	0.304539	0.918072	D0C6W4	Uncharacterized protein
30.6714	30.5856	30.9225	31.1688	32.0832	32.1954	31.9808	32.0501	31.8307	31.6003	31.6615	31.5858	31.6347	31.4446	31.408	31.4462	+	Colony A-3/WT	+	Colony B-3/WT	+	Colony C-3/WT	12	12	12	60.9	60.9	60.9	31.023	62316000000	351	2.42137	0.00204234	-0.646323	-4.57514	3.90407	0.000219931	0.593961	8.73291	1.30247	0.0336986	0.186191	2.44935	D0C6W5	Chloride peroxidase
23.9916	22.3991	24.4454	24.3661	24.9293	24.8336	24.7879	24.6873	24.7259	24.8815	24.6607	24.905	24.5984	24.9264	24.5215	24.6459							6	6	6	23.1	23.1	23.1	38.572	511610000	26	0.911781	0.0610606	-0.872461	-1.79663	0.6429	0.137325	0.136501	1.34392	0.520627	0.217645	0.120253	1.13015	D0C6W7	Saccharopine dehydrogenase
26.7265	26.6699	26.775	26.4124	26.3999	26.4683	26.6576	26.7042	26.6339	26.0788	26.7565	26.6576	26.7214	26.5619	26.9117	26.5933							4	4	4	44.1	44.1	44.1	16.774	1984100000	59	0.175427	0.501571	-0.0511107	-0.451211	0.61282	0.148618	-0.139574	-1.29201	0.425904	0.27956	-0.165388	-0.958001	D0C6W9	Transcriptional regulator, MerR family
29.7723	29.7461	30.0104	29.7572	30.2352	30.3769	30.0594	30.0716	30.5349	30.5939	30.1991	30.2523	29.5081	29.4669	29.5501	29.6755	+	Colony A-3/WT	+	Colony B-3/WT	+	Colony C-3/WT	12	12	12	60.9	60.9	60.9	25.754	20823000000	193	1.8892	0.00705303	0.271331	3.4949	3.45443	0.00026601	0.635637	7.24483	3.61774	0.000395437	0.844867	7.75827	D0C6X0	DJ-1/PfpI family protein
27.6984	27.525	27.2261	27.7044	27.8457	27.8687	27.4845	27.5183	27.7229	27.7966	27.7088	27.841	28.0114	27.9385	27.6271	27.8011	+	Colony A-3/WT					15	15	15	60.6	60.6	60.6	43.168	4269100000	137	1.14176	0.0357172	-0.306055	-2.1791	0.582486	0.159814	-0.165216	-1.23925	0.371925	0.320908	-0.0771999	-0.856322	D0C6X1	Pyridine nucleotide-disulfide oxidoreductase
25.5345	27.4509	27.303	27.1169	24.612	23.9085	24.2656	27.2757	24.0402	24.1773	24.5705	24.8141	27.3027	24.3319	24.5078	23.9587	+	Colony A-3/WT					3	3	3	24.7	24.7	24.7	19.991	2869400000	22	1.06954	0.0422057	1.82607	2.05875	0.00302425	0.988381	-0.0098381	-0.00906573	0.33905	0.351319	-0.624767	-0.792796	D0C6X2	Transcriptional regulator, Rrf2 family
24.1751	22.9283	24.7493	24.4156	24.3251	24.765	24.9572	24.8152	24.6118	24.42	24.8515	24.4296	25.0049	25.051	25.0507	25.1209	+	Colony A-3/WT	+	Colony B-3/WT	+	Colony C-3/WT	5	5	5	28.3	28.3	28.3	21.604	512270000	28	1.32403	0.0247052	-0.989812	-2.48596	1.31136	0.02836	-0.341272	-2.46443	2.43378	0.00296346	-0.478655	-4.60228	D0C6X4	Transcriptional regulator, TetR family
25.4782	25.6518	25.2282	25.5605	25.8082	25.4278	25.6999	25.2417	25.8365	25.8403	25.5507	25.7978	25.4205	25.6014	25.62	25.7962							7	7	7	34.3	34.3	34.3	27.256	985710000	46	0.498406	0.183968	-0.129831	-1.09037	0.167935	0.534888	-0.065104	-0.434225	0.6876	0.140594	0.14683	1.42041	D0C6X6	Oxidoreductase, short chain dehydrogenase/reductase family protein
24.133	24.2179	24.3304	24.2983	23.3501	23.912	23.2856	23.4835	24.3301	24.284	24.2916	23.7318	23.5876	24.0101	24.6007	23.7274							3	3	3	16.7	16.7	16.7	26.346	281070000	23	0.533083	0.1669	0.263454	1.1523	0.906674	0.0722146	-0.473673	-1.78813	0.277023	0.41856	0.177917	0.668941	D0C6X7	Oxidoreductase, short chain dehydrogenase/reductase family protein
27.828	27.7661	28.0218	27.7001	28.1901	27.6756	27.8428	28.0198	27.9305	27.9132	27.8392	27.8805	27.8447	28.1323	28.2718	28.2311	+	Colony A-3/WT			+	Colony C-3/WT	12	12	12	59.7	59.7	59.7	31.885	4948400000	199	1.30357	0.0254125	-0.290974	-2.45122	0.60482	0.151823	-0.187897	-1.27814	1.23098	0.0392131	-0.229124	-2.32862	D0C6X8	D-bifunctional domain protein
26.9774	26.6828	26.7946	27.066	27.2899	27.3163	27.0192	26.9488	27.0222	27.3608	26.9964	26.7659	27.2248	27.6705	27.3148	27.2444	+	Colony A-3/WT					21	21	21	55.2	55.2	55.2	67.247	2838600000	121	1.92745	0.00646776	-0.483401	-3.56762	0.778069	0.0977342	-0.220045	-1.57336	1.05557	0.0592841	-0.327318	-2.03552	D0C6Y0	Acyl-CoA dehydrogenase, C-terminal domain protein
26.8541	26.4465	26.9122	26.9036	26.9542	27.1639	27.0135	27.0349	26.7526	26.6147	26.9932	27.0961	28.3457	28.6659	28.6108	28.4951	+	Colony A-3/WT	+	Colony B-3/WT	+	Colony C-3/WT	17	17	17	36.8	36.8	36.8	65.322	4081000000	101	4.941	0	-1.75029	-13.2431	5.69786	0	-1.48777	-17.8226	4.84148	0	-1.66522	-12.7317	D0C6Y6	POTRA domain protein, ShlB-type
27.9168	27.7214	27.6285	27.6922	28.4955	28.4369	27.9327	27.7721	27.4887	27.6525	27.4608	27.6505	27.6462	27.5673	28.3145	28.0421							30	30	23	41.2	41.2	31.2	111.8	4711000000	250	0.35481	0.285423	-0.152795	-0.823415	0.482291	0.210436	0.266783	1.06131	0.918353	0.080072	-0.329395	-1.80755	D0C6Y7	Filamentous hemeagglutinin family domain protein
29.831	29.616	29.8941	29.8737	29.3725	29.2903	29.7438	29.4882	29.7222	28.9889	29.7497	29.5395	30.3051	30.2136	30.32	30.3181	+	Colony A-3/WT	+	Colony B-3/WT	+	Colony C-3/WT	11	11	11	75.5	75.5	75.5	16.511	18278000000	137	3.39182	0.000323144	-0.485495	-7.05559	3.69045	0.000183908	-0.815478	-7.99649	2.35042	0.00373125	-0.78913	-4.42175	D0C6Y8	Uncharacterized protein
26.6178	26.3471	26.667	26.7196	27.1833	26.9532	26.638	26.9812	26.5167	26.8916	26.5579	27.0296	26.3175	26.4975	26.4628	26.3815			+	Colony B-3/WT	+	Colony C-3/WT	7	7	7	46.9	46.9	46.9	28.494	2058500000	91	0.958799	0.0535139	0.173022	1.87476	2.32958	0.00376501	0.524068	4.37729	1.34987	0.0308799	0.334106	2.52997	D0C6Z4	Transcriptional regulator, GntR family
23.9256	22.7264	23.4829	25.6685	22.8926	22.8468	23.5447	23.715	24.8737	22.6597	24.6939	23.3704	24.8165	24.7705	24.5227	23.6588			+	Colony B-3/WT			3	3	3	14.2	14.2	14.2	35.55	138730000	20	NaN	1	0	NaN	1.84762	0.0091992	-1.19231	-3.41659	0.40035	0.296866	-0.54268	-0.91024	D0C6Z7	LysR substrate binding domain protein
23.4485	25.0391	23.7867	24.442	24.4967	24.4549	24.068	24.3786	23.8787	24.3429	24.4467	23.2702	24.5917	24.4044	23.4983	24.3451							3	3	3	14.1	14.1	14.1	23.072	364430000	14	0.0245893	0.900158	-0.0308552	-0.0719841	0.212857	0.465145	0.139683	0.533976	0.254527	0.445962	-0.225296	-0.622509	D0C702	Transcriptional regulator, TetR family
25.4676	25.6837	24.9299	25.2346	25.0474	25.1593	22.6868	24.7341	25.4806	25.1285	24.1644	24.9828	25.0949	25.3113	25.4041	25.4273							18	2	2	51.8	6.9	6.9	56.139	676100000	24	0.0379283	0.851659	0.0195398	0.109506	0.759362	0.10243	-0.902506	-1.5419	0.607598	0.171836	-0.370349	-1.28296	D0C703	NADP-dependent fatty aldehyde dehydrogenase
24.68	24.7541	24.4693	24.5919	22.2862	23.4943	24.0255	24.6961	24.7604	23.39	24.7972	23.5084	24.1511	24.8298	23.8842	24.5274							5	5	5	12.9	12.9	12.9	64.513	272820000	24	0.60166	0.137642	0.275719	1.27265	0.624903	0.143968	-0.722631	-1.31291	0.213576	0.498397	-0.234133	-0.535536	D0C704	Putative dihydroxy-acid dehydratase
25.1384	24.8979	24.5638	25.0622	25.0574	25.0615	25.2973	25.0338	24.798	24.7869	24.8267	25.0794	24.8688	25.1482	25.3007	25.4285					+	Colony C-3/WT	7	7	7	37	37	37	35.088	648770000	58	0.760968	0.0887967	-0.270945	-1.54461	0.218744	0.457296	-0.0740204	-0.5467	1.18879	0.0441676	-0.313775	-2.25777	D0C706	LysR substrate binding domain protein
26.0827	26.2823	26.0132	26.2067	25.8935	26.1071	26.1312	25.5199	26.0139	26.0693	26.2325	26.2422	26.5855	26.7874	26.3452	26.6164	+	Colony A-3/WT	+	Colony B-3/WT	+	Colony C-3/WT	5	5	5	21.1	21.1	21.1	38.277	1508700000	38	2.14838	0.00373564	-0.437386	-4.00161	2.14096	0.00544561	-0.670719	-3.98662	2.20696	0.00499578	-0.444138	-4.121	D0C713	GroES-like protein
26.4794	25.9648	25.7791	25.8602	27.5669	27.33	27.2516	27.2916	25.8149	26.6887	26.5085	26.6937	25.7806	26.3276	25.785	26.1864			+	Colony B-3/WT			9	9	9	33.3	33.3	33.3	32.043	1891200000	54	0.00158611	0.992584	0.00100327	0.00476248	3.85176	0.00020915	1.34014	8.54736	0.805891	0.105018	0.406561	1.62002	D0C721	Ribose-phosphate diphosphokinase
28.2931	28.3766	28.1726	28.2122	29.0176	29.1903	29.1762	28.8896	28.6047	28.5464	28.3451	28.4746	28.377	28.2198	28.2505	28.1271			+	Colony B-3/WT	+	Colony C-3/WT	21	21	21	60	60	60	55.25	7595700000	295	0.107844	0.643827	0.0200429	0.292013	4.07648	0	0.824841	9.3697	1.77003	0.0131903	0.249116	3.27249	D0C722	Nicotinate phosphoribosyltransferase, (NAPRTase) family
24.7669	24.4268	24.303	24.6602	24.669	24.5767	24.2933	24.4522	24.9277	25.0477	24.7376	25.104	24.709	25.1578	25.0999	24.9234	+	Colony A-3/WT	+	Colony B-3/WT			3	3	3	16.7	16.7	16.7	30.865	542730000	36	1.59679	0.0127821	-0.433337	-2.95931	1.97577	0.00673077	-0.474732	-3.66045	0.0495171	0.842797	-0.0182972	-0.14132	D0C723	Hydrolase, NUDIX family
24.0858	23.9457	25.0459	23.7499	24.6457	23.824	23.5502	23.1636	23.3919	24.9277	23.3304	23.9271	23.8652	24.2054	24.3118	24.2127							6	6	6	15.5	15.5	15.5	53.02	257640000	39	0.0680621	0.754094	0.0580416	0.19084	0.488952	0.206868	-0.352926	-1.07335	0.27544	0.420578	-0.254479	-0.665701	D0C724	Methylenetetrahydrofolate reductase (NAD(P)H)
26.9643	27.3886	26.9031	26.9199	26.604	27.4342	27.3778	27.3867	27.0683	26.5174	27.188	26.4057	28.2359	27.956	28.0897	27.6881	+	Colony A-3/WT	+	Colony B-3/WT	+	Colony C-3/WT	6	6	6	60.8	60.8	60.8	15.141	3322100000	85	2.93109	0.00063711	-0.948437	-5.78034	1.85493	0.0091	-0.791742	-3.4303	2.72379	0.00242209	-1.19758	-5.26686	D0C728	Uncharacterized protein
24.8045	24.6094	25.8995	24.5196	25.5727	25.2166	24.5345	22.1839	25.3092	25.8352	24.8376	25.3904	25.6243	25.6648	25.9538	25.1847							12	12	12	38	38	38	48.892	738220000	49	0.92521	0.0589664	-0.648646	-1.81895	0.782053	0.0968652	-1.22996	-1.58005	0.459367	0.255959	-0.263806	-1.01963	D0C730	LlaJI restriction endonuclease
29.2675	29.2517	29.1482	29.2555	29.3195	29.2338	29.219	29.1912	29.4467	29.3608	29.3449	29.3981	29.9207	29.9086	30.0807	30.0625	+	Colony A-3/WT	+	Colony B-3/WT	+	Colony C-3/WT	29	29	29	65.6	65.6	65.6	58.932	14759000000	397	5.13591	0	-0.762362	-14.3012	5.10356	0	-0.752232	-14.1202	4.67279	0	-0.605477	-11.907	D0C731	ATPase family associated with various cellular activities (AAA)
27.4387	27.4629	27.3223	27.4205	27.7439	27.565	27.9057	27.6952	27.512	27.4829	27.4805	27.659	27.7653	27.8067	27.8168	27.494	+	Colony A-3/WT					16	16	16	45	45	45	47.154	3915000000	175	2.02611	0.00480404	-0.30961	-3.75838	0.0221332	0.914383	0.00674868	0.0649636	1.11908	0.0516313	-0.187102	-2.14126	D0C732	Cytosine-specific methyltransferase
24.8748	25.0555	24.1199	23.752	24.7999	24.8489	24.557	24.2378	24.1558	24.1809	24.7098	23.9505	24.693	24.4596	23.1292	24.491							6	6	6	43.7	43.7	43.7	20.134	298180000	21	0.217511	0.439687	0.257334	0.544043	0.495827	0.203015	0.417692	1.08573	0.0499397	0.841687	0.0560327	0.142467	D0C733	DNA mismatch endonuclease Vsr
29.8761	29.8746	29.7676	29.7322	30.2782	30.0552	30.3133	30.1106	29.968	30.2016	30.0674	30.1	30.5009	30.602	30.7318	30.5366	+	Colony A-3/WT	+	Colony B-3/WT	+	Colony C-3/WT	31	31	31	65.4	65.4	65.4	47.042	23949000000	406	4.7784	0	-0.780185	-12.4173	2.60595	0.00205697	-0.403504	-4.98968	3.46056	0.00048	-0.508568	-7.2636	D0C734	DUF262 domain-containing protein
26.1243	26.2568	25.8931	26.1171	26.434	25.9619	26.2379	26.3559	25.9671	25.8623	26.2407	26.4727	26.7995	26.4961	26.394	26.8275	+	Colony A-3/WT	+	Colony B-3/WT	+	Colony C-3/WT	8	8	8	36.2	36.2	36.2	30.204	1644400000	79	2.15813	0.00370806	-0.531432	-4.02135	1.36044	0.0253781	-0.381856	-2.54801	1.51442	0.0224168	-0.49356	-2.81412	D0C735	AAA_15 domain-containing protein
28.3629	28.682	28.3497	28.0858	27.8371	27.7971	29.022	28.1028	28.4392	27.0064	28.7979	28.642	27.7206	27.4103	27.7018	27.4031	+	Colony A-3/WT	+	Colony B-3/WT			3	3	3	28.2	28.2	28.2	10.086	5858900000	48	2.77587	0.00102874	0.811141	5.39268	1.10078	0.0447263	0.63079	2.11075	0.778323	0.112298	0.662419	1.57379	D0C749	Uncharacterized protein
26.045	25.9923	25.9474	25.5699	25.8939	25.7589	25.8232	25.6721	25.9588	25.5397	25.5416	25.8263	26.4882	26.8674	26.8611	26.8427	+	Colony A-3/WT	+	Colony B-3/WT	+	Colony C-3/WT	18	18	18	25.7	25.7	25.7	117.78	1408900000	106	3.07687	0.000493739	-0.876194	-6.16277	4.09171	0	-0.977844	-9.42787	3.53394	0.000370107	-1.04826	-7.49114	D0C750	Helicase C-terminal domain protein
23.8134	23.1531	23.8687	24.7409	23.219	24.1664	23.8604	23.3006	23.2341	24.932	22.3856	24.1608	23.9839	24.9818	22.9467	24.3651							2	2	2	15.3	15.3	15.3	19.649	134510000	14	NaN	1	0	NaN	0.392281	0.270343	-0.432767	-0.895023	0.224861	0.484239	-0.391238	-0.559843	D0C751	Toxin-antitoxin system, toxin component, GNAT family
27.2999	27.3109	26.9642	27.0798	27.4482	27.4611	27.5334	27.5114	27.5207	27.0872	27.5669	27.41	26.7257	26.8386	26.823	26.8497	+	Colony A-3/WT	+	Colony B-3/WT	+	Colony C-3/WT	7	7	7	41.1	41.1	41.1	20.525	3056300000	110	2.12194	0.00385455	0.35444	3.94834	5.92712	0	0.679276	19.4876	2.71689	0.00249606	0.586927	5.25034	D0C753	Probable RNA 2-phosphotransferase
24.5541	23.8652	24.2345	24.1507	24.6903	23.6057	24.2726	24.3539	24.1405	25.0501	24.9297	23.46	24.0008	24.92	24.4291	24.5796							2	2	2	16	16	16	20.311	275950000	28	0.551239	0.158147	-0.281287	-1.18442	0.368245	0.288819	-0.251755	-0.849275	0.075113	0.774347	-0.0873222	-0.209251	D0C754	Uncharacterized protein
26.2492	26.2984	26.2671	25.9167	27.2178	26.3089	27.0785	26.4949	26.7056	26.4907	26.6686	26.8731	26.4208	26.5503	26.5532	26.7638	+	Colony A-3/WT					6	6	6	31.6	31.6	31.6	28.337	1890200000	45	1.84483	0.00745976	-0.389191	-3.41138	0.382305	0.277054	0.203011	0.876115	0.483249	0.239822	0.112473	1.06304	D0C762	Response regulator receiver domain protein
24.2898	21.5414	22.4095	23.8753	32.7863	32.9959	32.9202	32.7538	20.6063	23.3832	24.4474	23.0486	33.5665	33.4065	33.5916	33.675	+	Colony A-3/WT	+	Colony B-3/WT	+	Colony C-3/WT	18	18	18	67.9	67.9	67.9	43.378	102560000000	271	5.48682	0	-10.5309	-16.4122	3.89819	0.000219178	-0.695889	-8.71187	4.92035	0	-10.6885	-13.1354	D0C763	Putative acriflavine resistance protein A
24.6697	23.6399	25.2618	23.5464	31.6966	31.8675	31.7553	30.7386	22.9021	23.4075	25.5201	23.8423	32.2501	31.503	31.5096	32.4654	+	Colony A-3/WT			+	Colony C-3/WT	34	34	34	46.9	46.9	46.9	112.65	37562000000	309	5.39125	0	-7.65257	-15.8095	0.535067	0.18044	-0.417512	-1.15582	4.87956	0	-8.014	-12.9252	D0C764	Efflux pump membrane transporter
27.7395	27.6967	27.1613	27.4557	25.9795	26.255	26.2382	26.6175	27.0586	27.2487	26.9185	26.7294	26.218	26.8018	24.2455	24.2148	+	Colony A-3/WT			+	Colony C-3/WT	6	6	6	52.1	52.1	52.1	10.962	2549900000	35	1.69918	0.0104861	2.14329	3.14305	0.631434	0.141432	0.902522	1.32418	1.26641	0.0365117	1.61878	2.38833	D0C766	Uncharacterized protein
24.6897	23.8792	24.1868	24.499	24.1269	23.225	23.7618	23.2874	24.7769	24.1681	22.9346	24.7	24.5106	24.4725	24.6491	24.8171			+	Colony B-3/WT			4	4	3	38.2	38.2	25.7	13.792	303780000	23	0.755703	0.0901983	-0.298639	-1.53574	2.37241	0.00372178	-1.01203	-4.46895	0.492812	0.233868	-0.46738	-1.08031	D0C767	Fimbrial protein
27.7093	27.9001	27.3216	27.5491	27.381	27.3188	27.0665	26.9659	27.3134	27.7454	27.4375	27.5699	27.5769	28.196	27.7435	27.8062			+	Colony B-3/WT			12	12	12	55.9	55.9	55.9	30.217	4006800000	135	0.54507	0.161181	-0.210625	-1.17352	2.11709	0.00547586	-0.647583	-3.93862	1.009	0.0650109	-0.314097	-1.95812	D0C768	Gram-negative pili assembly chaperone domain protein
29.5728	29.5811	29.3533	29.4155	29.211	29.0734	29.0256	28.9952	29.4221	29.6284	29.505	29.5418	29.5887	29.7639	29.8253	29.692	+	Colony A-3/WT	+	Colony B-3/WT	+	Colony C-3/WT	26	26	26	45.3	45.3	45.3	91.599	14877000000	423	1.67515	0.0111842	-0.236803	-3.09958	4.03118	0.000240602	-0.641149	-9.19854	1.56765	0.0202323	-0.193153	-2.90771	D0C769	Fimbrial usher protein
28.508	28.3811	28.1009	28.1712	27.6915	27.695	27.9083	27.5538	28.1885	27.8815	28.1759	28.163	29.0031	28.981	29.0623	29.1628	+	Colony A-3/WT	+	Colony B-3/WT	+	Colony C-3/WT	13	13	13	69	69	69	36.204	6906100000	179	3.52128	0.000350711	-0.762039	-7.45148	5.42354	0	-1.34017	-16.0107	4.53716	0	-0.950083	-11.2802	D0C770	Fimbrial protein
31.6588	31.6348	31.827	31.894	31.5778	31.6232	31.6187	31.3561	31.5166	30.9609	31.6418	31.6422	31.6157	31.3704	31.3912	31.3533	+	Colony A-3/WT					15	15	15	62.6	62.6	62.6	39.249	60337000000	315	1.96232	0.00594701	0.32101	3.6345	0.594117	0.155392	0.111319	1.25954	0.0150795	0.948499	0.00775146	0.0445992	D0C772	S-(hydroxymethyl)glutathione dehydrogenase
28.568	28.8407	28.4924	28.9323	29.4275	29.7526	29.5682	29.3551	30.3881	29.9909	29.6383	29.9567	28.5409	28.7791	28.0985	28.9033			+	Colony B-3/WT	+	Colony C-3/WT	17	17	17	48.2	48.2	48.2	70.994	13111000000	333	0.253085	0.391878	0.127904	0.619502	2.51343	0.00254237	0.945385	4.77901	3.02377	0.00128814	1.41305	6.02133	D0C773	Uncharacterized protein
24.5424	24.5004	24.9949	25.326	25.685	25.4551	25.4946	25.3853	25.8733	25.8851	25.9245	25.6753	23.7738	24.639	24.7265	23.8613			+	Colony B-3/WT	+	Colony C-3/WT	9	9	9	34.9	34.9	34.9	44.088	745310000	49	0.945454	0.0557337	0.590757	1.85259	2.54198	0.00228161	1.25481	4.84337	3.08352	0.00107809	1.58937	6.18063	D0C774	Catalase domain-containing protein
25.4388	24.0155	23.8323	23.6887	26.8022	26.3298	26.6996	26.4517	26.8394	26.7149	26.409	26.3386	24.6001	22.8696	23.9227	23.2137			+	Colony B-3/WT	+	Colony C-3/WT	6	6	6	44.5	44.5	44.5	18.044	1129100000	55	0.48258	0.192928	0.592317	1.06183	3.47255	0.000269327	2.91932	7.30037	3.45758	0.000478405	2.92396	7.25446	D0C776	Uncharacterized protein
26.415	26.3897	26.0249	24.0902	25.9881	25.1883	25.6896	26.4305	25.5828	24.8723	25.6656	25.9644	25.9357	25.9467	26.6126	25.9572							9	9	9	22.8	22.8	22.8	58.807	1434500000	28	0.273844	0.36719	-0.383093	-0.662433	0.412718	0.254618	-0.288949	-0.933437	1.07987	0.056607	-0.591786	-2.07593	D0C777	Phospholipase D domain protein
27.2994	27.1342	27.2044	27.1605	27.1513	26.9685	27.0788	26.8965	27.2521	26.7418	26.9887	26.8897	26.7303	27.0871	27.1261	26.9661	+	Colony A-3/WT					8	8	8	51.3	51.3	51.3	22.608	2631600000	116	1.21935	0.0307915	0.222222	2.30906	0.170118	0.531907	0.046391	0.439189	0.0228204	0.924377	-0.00934219	-0.0669315	D0C778	Uncharacterized protein
25.5348	26.0345	24.1015	25.4782	26.74	26.2957	26.4308	26.3469	26.9071	26.5245	26.4174	26.3024	24.0198	24.096	23.4724	25.5264			+	Colony B-3/WT	+	Colony C-3/WT	3	3	3	47.6	47.6	47.6	11.943	1098600000	23	0.836687	0.0732892	1.00863	1.67152	2.53899	0.00234621	2.17473	4.83661	2.5827	0.00248474	2.25923	4.93616	D0C779	Uncharacterized protein
32.4768	32.6714	32.5888	32.3134	32.0473	32.0921	32.5091	31.9422	32.7276	32.683	32.5158	32.6713	31.132	31.0927	31.1027	31.2624	+	Colony A-3/WT	+	Colony B-3/WT	+	Colony C-3/WT	3	3	3	37.5	37.5	37.5	8.0884	96898000000	83	5.37774	0	1.36514	15.726	3.58795	0.000169312	1.00023	7.66242	6.54814	0	1.50198	24.7968	D0C780	Uncharacterized protein
24.5194	24.5709	24.4435	23.2748	24.4157	22.1871	24.6266	24.1143	24.7539	24.3174	24.5204	24.2436	23.1273	23.7997	24.1478	23.4273					+	Colony C-3/WT	3	3	3	20.1	20.1	20.1	40.486	446880000	8	0.741562	0.0936448	0.57663	1.51189	0.131564	0.604918	0.210389	0.349511	1.80554	0.0121126	0.83333	3.33813	D0C781	Renal dipeptidase family protein
26.1221	26.1772	25.6351	25.7349	25.86	25.7416	25.9254	25.499	25.969	25.7225	25.9746	25.9982	25.6236	25.9192	25.9232	25.9527							7	7	7	26.8	26.8	26.8	43.881	1174900000	74	0.153078	0.540903	0.0626464	0.400088	0.346328	0.308558	-0.0981765	-0.806975	0.247666	0.454816	0.0613866	0.608168	D0C782	PqqA peptide cyclase
27.5298	27.5703	27.6433	27.7333	27.3023	27.2403	27.8038	27.2804	27.7108	27.1613	28.0042	27.6596	27.7757	27.7094	27.964	27.9445	+	Colony A-3/WT	+	Colony B-3/WT			4	4	4	61.7	61.7	61.7	10.776	4045200000	83	1.60617	0.0125495	-0.229222	-2.97599	1.62176	0.015078	-0.441689	-3.00378	0.534029	0.210048	-0.214396	-1.15398	D0C783	PqqA binding protein
29.6296	29.5486	29.4119	29.3557	29.4221	29.4129	29.1297	29.2085	29.2306	29.2921	29.3164	29.5684	29.1087	29.4645	29.478	29.2446							13	13	13	59.5	59.5	59.5	29.665	13296000000	204	0.72751	0.0969645	0.162519	1.48815	0.0968284	0.682203	-0.0306449	-0.26463	0.0871063	0.745177	0.0279365	0.240074	D0C784	Pyrroloquinoline-quinone synthase
29.1276	29.2519	29.2338	29.2097	28.6402	29.2633	28.6033	28.7422	29.2619	29.2485	29.083	29.0705	28.8606	28.9572	28.6058	28.4035	+	Colony A-3/WT			+	Colony C-3/WT	9	9	9	60.1	60.1	60.1	33.754	10111000000	138	2.09216	0.00418449	0.498988	3.8888	0.212336	0.466135	0.105468	0.532848	1.8321	0.0115637	0.459208	3.38756	D0C785	Coenzyme PQQ synthesis protein B
27.301	27.1688	27.1665	26.9467	27.4241	27.4078	27.3278	27.4582	27.5778	27.6248	27.352	27.2314	27.1048	27.2115	27.5275	27.3721							25	20	20	48.6	42.3	42.3	78.591	3233100000	153	0.639997	0.12321	-0.158192	-1.33893	0.470893	0.216904	0.100521	1.04064	0.495591	0.232622	0.142559	1.08531	D0C786	Polyphosphate kinase
24.1178	23.4505	24.4499	25.6502	24.4933	23.8056	24.4859	24.8447	24.0384	24.2204	23.73	23.7706	24.6333	25.4106	23.9312	24.3803							4	4	4	26.3	26.3	26.3	24.361	303960000	24	0.114928	0.625384	-0.171767	-0.309387	0.188	0.502622	-0.181499	-0.479389	1.01074	0.0648354	-0.648993	-1.96102	D0C789	Isochorismatase
25.3284	25.5581	25.1633	25.7114	25.4757	24.4434	25.3694	25.5289	26.5226	25.7936	25.9668	25.8772	25.7073	25.7525	25.6343	25.696	+	Colony A-3/WT					6	6	6	37.9	37.9	37.9	23.517	1002700000	22	1.08165	0.041064	-0.257238	-2.0789	0.985594	0.0599814	-0.493197	-1.91926	1.06875	0.0582668	0.342535	2.05744	D0C791	ABC transporter, ATP-binding protein
28.766	28.594	28.5534	28.7045	28.8044	28.5713	28.6147	28.6475	29.0084	28.9315	28.5418	28.7603	28.9208	28.8118	29.0149	28.7238	+	Colony A-3/WT	+	Colony B-3/WT			11	11	11	41	41	41	28.5	8686000000	157	1.42639	0.0196811	-0.21337	-2.66121	1.37001	0.0249827	-0.208386	-2.56438	0.18493	0.544233	-0.057364	-0.472546	D0C793	Molybdate ABC transporter, periplasmic molybdate-binding protein
23.5311	23.1688	23.3487	23.6063	23.8687	25.1909	23.8492	24.3815	23.3497	24.0045	23.66	24.0798	23.7119	24.1417	23.8565	22.7639							3	3	3	8.3	8.3	8.3	53.918	46596000	7	0.268685	0.373351	-0.204799	-0.651834	NaN	1	0	NaN	NaN	1	0	NaN	D0C795	Anthranilate 1,2-dioxygenase, large subunit
33.2487	33.192	33.4168	33.2869	32.9707	32.9796	32.9253	33.0452	33.2369	33.0422	32.9881	33.0232	31.6934	31.7561	31.6239	31.5371	+	Colony A-3/WT	+	Colony B-3/WT	+	Colony C-3/WT	19	19	19	85.8	85.8	85.8	27.592	146100000000	432	6.50438	0	1.63347	24.3803	6.56834	0	1.32758	24.9914	5.92044	0	1.41997	19.437	D0C7A6	3-hydroxybutyrate dehydrogenase
24.3397	25.4591	25.1106	25.7625	23.9335	25.0059	24.0306	24.7048	23.8318	25.4909	25.0464	23.4891	23.0637	25.2932	24.0597	23.6145	+	Colony A-3/WT					2	2	2	13.1	13.1	13.1	50.215	613320000	40	1.06668	0.0424662	1.16017	2.05399	0.322014	0.329984	0.410887	0.759335	0.281496	0.411996	0.456745	0.67807	D0C7A7	Putative ATP synthase F0, A subunit
28.345	28.2694	27.949	28.1467	28.3054	28.1505	28.1906	28.4621	28.2125	28.4621	28.2286	28.1946	27.8619	27.945	28.2393	28.0985			+	Colony B-3/WT	+	Colony C-3/WT	7	7	7	58.7	58.7	58.7	15.531	5812800000	98	0.546258	0.160594	0.14135	1.17562	1.16157	0.0388791	0.240968	2.2122	1.20039	0.0432453	0.238281	2.27723	D0C7A8	Uncharacterized protein
26.5391	26.6555	26.6427	26.3428	26.5756	26.6539	26.4063	26.5105	26.0922	26.4468	26.0689	25.8715	26.7381	26.5898	26.6576	26.4691					+	Colony C-3/WT	6	6	6	42.6	42.6	42.6	22.527	1775100000	107	0.315261	0.321624	-0.0686359	-0.74596	0.446581	0.232215	-0.0770817	-0.996198	2.00913	0.00852107	-0.493783	-3.72521	D0C7A9	Transcriptional regulator, TetR family
27.3679	27.4852	27.378	27.3109	27.7064	27.8241	27.6572	27.413	27.6919	27.7813	27.5322	27.7323	25.6953	25.8101	25.8634	26.3203	+	Colony A-3/WT	+	Colony B-3/WT	+	Colony C-3/WT	9	9	9	48	48	48	31.26	3140000000	135	4.31199	0	1.46321	10.3063	4.39412	0	1.72786	10.6522	4.68192	0	1.76209	11.9503	D0C7B1	DUF3298 domain-containing protein
24.7215	24.5838	23.9825	24.4484	25.0901	23.1848	25.523	23.7213	24.6402	24.3703	24.696	23.4648	24.6883	24.0349	25.2419	24.6833							4	4	4	9.6	9.6	9.6	33.292	470910000	39	0.329892	0.306864	-0.228096	-0.774858	0.182031	0.51139	-0.282336	-0.466061	0.437558	0.271626	-0.369308	-0.979577	D0C7B3	LysR substrate binding domain protein
32.4948	32.4299	32.5081	32.4102	32.1389	32.3434	32.3449	32.2828	32.4717	31.8857	32.3266	32.3823	32.3255	32.1802	32.3005	32.1755	+	Colony A-3/WT					17	17	17	86.3	86.3	86.3	25.186	101480000000	404	2.46488	0.00187006	0.215303	4.67078	0.203734	0.479848	0.0320816	0.514109	0.0545355	0.828206	0.0211015	0.154884	D0C7B4	3-oxoacid CoA-transferase, A subunit
26.0013	26.0306	26.1817	24.4603	25.776	23.7121	24.6182	25.6924	24.8687	23.5055	23.8365	25.5661	25.1662	23.4169	25.2727	25.1763							2	2	2	6.2	6.2	6.2	51.372	754380000	8	0.73966	0.0941072	0.91045	1.50868	0.106589	0.659825	0.191666	0.288917	0.189008	0.538455	-0.313815	-0.481631	D0C7B5	Putative TIGR00366 family protein
33.438	33.4031	33.6069	33.6957	32.9482	33.0111	33.1491	33.1253	33.6715	33.5296	33.3608	33.412	33.2543	33.1219	33.0969	33.0612	+	Colony A-3/WT			+	Colony C-3/WT	23	22	22	76.2	76.2	76.2	40.813	204580000000	665	2.59123	0.00146502	0.402332	4.95576	0.550735	0.173395	-0.0751505	-1.18353	2.36318	0.00359119	0.359883	4.44911	D0C7B6	Acetyl-CoA C-acetyltransferase
26.6866	26.6502	26.5747	26.9957	27.5669	27.0832	27.4257	27.2196	27.3112	26.8833	27.2284	27.0058	27.3712	27.3555	27.3818	26.9413	+	Colony A-3/WT					9	9	9	47.3	47.3	47.3	34.49	2869400000	122	2.03795	0.00466193	-0.53564	-3.78158	0.155092	0.558582	0.0613875	0.404753	0.48493	0.238574	-0.155267	-1.06608	D0C7B7	Transcriptional regulator, LysR family
28.0579	27.8409	27.8103	27.7852	28.162	27.9562	28.0124	27.7244	28.1114	28.0782	28.1344	28.05	28.4018	28.4423	28.5179	28.3675	+	Colony A-3/WT	+	Colony B-3/WT	+	Colony C-3/WT	13	13	13	48.7	48.7	48.7	33.793	5551400000	146	3.67435	0.000392573	-0.558816	-7.94322	2.54949	0.00224163	-0.468636	-4.8604	4.00283	0.000243655	-0.33888	-9.09284	D0C7B8	Transcriptional regulator, LysR family
27.0509	27.0561	27.1581	26.4766	24.9425	25.212	25.9566	25.3128	26.1842	25.3907	26.3112	26.558	25.495	25.8154	25.9724	25.9069	+	Colony A-3/WT					4	4	4	45.3	45.3	45.3	9.1424	1449900000	34	3.04045	0.000603509	1.138	6.06549	0.939611	0.0667312	-0.441463	-1.84288	0.529598	0.212819	0.313604	1.14611	D0C7B9	Uncharacterized protein
31.6765	31.5908	31.7118	31.6685	30.0893	30.1415	30.4448	30.3502	30.5479	30.674	30.4897	30.6793	32.1623	32.1199	32.1578	32.0856	+	Colony A-3/WT	+	Colony B-3/WT	+	Colony C-3/WT	23	23	23	69.4	69.4	69.4	51.455	52817000000	384	5.26551	0	-0.46949	-15.0487	6.20814	0	-1.87495	-21.7358	7.07759	0	-1.53367	-30.4267	D0C7C1	Aspartate ammonia-lyase
28.7156	28.6791	28.6828	28.4886	28.1039	28.181	28.2876	28.1316	28.5181	28.4662	28.6783	28.5151	28.5476	28.506	28.5732	28.5145	+	Colony A-3/WT	+	Colony B-3/WT			30	30	30	50.6	50.6	50.6	80.915	7203800000	316	1.016	0.0473104	0.106196	1.96976	3.77859	0.000201258	-0.359304	-8.29357	0.0662847	0.798107	0.00906706	0.186164	D0C7C2	TonB-dependent siderophore receptor
29.5466	29.3952	29.4457	29.1172	29.4853	29.4358	29.1387	29.2559	29.3764	29.4117	29.2755	29.704	29.1072	29.1306	29.2272	29.3951							8	8	8	51.5	51.5	51.5	22.199	13021000000	147	0.692593	0.106224	0.161132	1.42891	0.503629	0.198681	0.113889	1.09975	1.04011	0.0609115	0.22685	2.00981	D0C7D3	FMN-dependent NADH-azoreductase
27.1501	27.0901	26.8622	26.8713	27.3219	26.8909	26.9064	27.2051	27.1063	27.0104	27.1226	27.2939	27.5783	27.6313	27.6172	27.4963	+	Colony A-3/WT	+	Colony B-3/WT	+	Colony C-3/WT	10	10	10	44.3	44.3	44.3	36.524	2995700000	136	3.48199	0.000341014	-0.587366	-7.32944	2.36516	0.00370719	-0.499698	-4.45336	3.28734	0.000559271	-0.447488	-6.74876	D0C7D7	Homoserine dehydrogenase
25.1491	25.481	25.0842	25.7091	24.9142	24.6102	25.4455	25.0154	25.5185	24.9216	24.8469	24.9654	25.893	25.3514	26.0345	25.8137	+	Colony A-3/WT	+	Colony B-3/WT	+	Colony C-3/WT	12	12	12	31.9	31.9	31.9	60.699	819670000	63	1.03796	0.0451683	-0.417279	-2.00624	1.84788	0.00920837	-0.776793	-3.41708	1.80065	0.0123416	-0.710032	-3.32905	D0C7D9	TIGR01244 family protein
24.6802	24.6757	24.6241	24.3277	23.6937	23.7632	23.2434	23.8993	24.0049	24.0448	23.9012	25.5028	24.6249	23.9125	24.6908	23.8481			+	Colony B-3/WT			3	3	3	21.2	21.2	21.2	26.041	263950000	30	0.606275	0.135837	0.307872	1.28067	1.22894	0.0334605	-0.619175	-2.32519	0.0766142	0.771323	0.094336	0.213142	D0C7E0	Metallo-beta-lactamase domain protein
25.5001	25.3798	25.2072	25.3795	25.1159	25.2325	25.1049	25.7528	25.4294	25.4288	25.6673	25.7877	25.1163	25.5054	25.1904	25.5676							7	7	7	23.6	23.6	23.6	48.323	855560000	46	0.0604976	0.778088	0.0217805	0.170839	0.082472	0.718618	-0.0433574	-0.228235	0.808555	0.104184	0.233417	1.62449	D0C7E1	Sigma-54 interaction domain protein
24.4591	23.6091	24.2069	24.0749	22.9466	24.0276	24.3743	23.0737	24.4444	24.2041	23.9143	24.5288	23.9232	23.1873	25.296	25.1252							3	3	3	19.5	19.5	19.5	34.461	235010000	41	0.22237	0.431994	-0.295451	-0.5545	0.59887	0.153824	-0.777371	-1.2678	0.0759074	0.772103	-0.110031	-0.211311	D0C7E2	Uncharacterized protein
29.4049	29.4331	29.4972	29.7316	29.3705	29.4039	29.2922	29.1718	29.4393	29.4351	29.3364	29.1224	27.8597	28.0146	28.0336	27.7985	+	Colony A-3/WT	+	Colony B-3/WT	+	Colony C-3/WT	12	12	12	49.3	49.3	49.3	38.319	10901000000	161	5.56295	0	1.59011	16.9081	5.70326	0	1.38299	17.8602	5.24975	0	1.4067	14.9558	D0C7E3	Putative chlorophyll synthesis pathway protein BchC
24.1438	24.8989	24.7946	24.7972	24.2714	24.7105	24.4981	24.7658	25.1746	24.2793	24.9001	24.7504	25.0269	23.7302	23.1924	24.8155							5	5	5	21.5	21.5	21.5	27.664	387610000	16	0.444814	0.215246	0.46737	0.99295	0.352671	0.302546	0.370203	0.819278	0.576334	0.185729	0.584858	1.2285	D0C7E4	Diacetyl reductase ((R)-acetoin forming)
28.2832	28.249	28.1347	28.4438	28.529	28.4409	28.4238	28.3418	28.5328	28.5529	28.4385	28.4479	26.4516	26.5117	26.6182	26.9597	+	Colony A-3/WT	+	Colony B-3/WT	+	Colony C-3/WT	14	14	14	52.7	52.7	52.7	49.936	5494800000	186	4.81786	0	1.64239	12.6131	5.2594	0	1.79859	15.0126	5.3986	0	1.85774	15.8551	D0C7E5	Dihydrolipoyl dehydrogenase
30.1163	29.9061	29.9364	30.0922	30.0851	30.1953	30.1958	30.0579	30.3222	30.3001	30.2881	30.4179	28.4908	28.4112	28.4425	28.3587	+	Colony A-3/WT	+	Colony B-3/WT	+	Colony C-3/WT	20	20	20	54.4	54.4	54.4	54.605	18749000000	333	6.70705	0	1.58694	26.3689	7.61505	0	1.70772	37.4324	8.21308	0	1.90626	47.1214	D0C7E6	Dihydrolipoamide acetyltransferase component of pyruvate dehydrogenase complex
30.8403	30.7321	30.9054	30.9548	30.9583	30.9193	30.9433	30.7453	31.3523	31.1521	31.1036	31.2919	29.0694	29.2886	29.3454	29.2459	+	Colony A-3/WT	+	Colony B-3/WT	+	Colony C-3/WT	16	16	16	62.5	62.5	62.5	36.59	33230000000	324	6.13973	0	1.62079	21.1663	6.16487	0	1.65421	21.3738	6.44777	0	1.98763	23.8517	D0C7E7	TPP-dependent acetoin dehydrogenase complex, E1 component, beta subunit
29.8818	29.8494	29.992	30.1354	29.6926	29.6662	29.6861	29.6811	30.0619	30.0619	29.7965	29.945	28.0425	27.6995	28.0373	27.9958	+	Colony A-3/WT	+	Colony B-3/WT	+	Colony C-3/WT	15	15	15	60.6	60.6	60.6	34.374	14886000000	227	5.9086	0	2.02088	19.3476	6.13374	0	1.73773	21.1171	5.93517	0	2.02253	19.5488	D0C7E8	Acetoin:2,6-dichlorophenolindophenol oxidoreductase, alpha subunit
28.0566	28.0161	28.0837	28.2737	27.4734	27.3724	27.3565	27.3129	27.9082	27.7631	27.9465	27.908	27.702	27.7991	27.995	27.7204	+	Colony A-3/WT	+	Colony B-3/WT			9	9	9	45.2	45.2	45.2	28.902	4490500000	144	1.86272	0.00743925	0.303377	3.44494	2.88432	0.00093617	-0.425317	-5.66147	0.441962	0.268532	0.0773296	0.987698	D0C7F1	TENA/THI-4 family protein
27.1344	27.363	27.4151	27.1827	27.6238	27.504	27.251	27.6871	27.0197	27.502	27.4763	26.6783	27.8923	28.0439	28.0656	27.5923	+	Colony A-3/WT	+	Colony B-3/WT	+	Colony C-3/WT	9	9	9	35.3	35.3	35.3	39.001	3656400000	76	2.54779	0.00173727	-0.624691	-4.85654	1.40553	0.0226412	-0.38205	-2.62528	1.74799	0.0137856	-0.729455	-3.23202	D0C7F3	Chorismate synthase
26.6688	26.1655	26.1512	26.2557	26.6702	26.3912	26.5235	26.1196	26.5635	26.6072	26.612	26.5939	26.8461	26.8353	26.832	26.8267	+	Colony A-3/WT	+	Colony B-3/WT	+	Colony C-3/WT	8	8	8	35.9	35.9	35.9	37.837	1925400000	81	2.29689	0.00275846	-0.524749	-4.3081	1.88829	0.00848473	-0.408917	-3.49317	6.07666	0	-0.240868	-20.6541	D0C7F4	50S ribosomal protein L3 glutamine methyltransferase
27.0183	27.1682	27.3185	26.9216	26.7727	26.7995	26.8522	27.1546	27.197	26.7057	27.2605	26.7981	27.0585	26.6396	27.0026	26.7152							5	5	5	41.9	41.9	41.9	21.802	2528900000	84	0.95402	0.0541791	0.252668	1.86682	0.110875	0.649544	0.0407734	0.299469	0.3347	0.356125	0.136375	0.78429	D0C7F6	Recombination protein RecR
31.3198	31.6213	31.5594	31.3276	31.1919	31.0982	31.6269	31.3918	31.4376	30.5263	31.5548	31.2248	30.9538	31.0361	31.3366	31.2083	+	Colony A-3/WT					7	7	7	69.7	69.7	69.7	12.015	50081000000	172	1.49809	0.016115	0.323333	2.78557	0.635883	0.139819	0.193515	1.33185	0.0762722	0.771385	0.0521598	0.212256	D0C7F7	Nucleoid-associated protein HMPREF0010_00687
25.1267	24.9243	25.4504	24.6291	25.5548	25.2742	23.7698	25.5687	24.7612	25.6116	24.6813	25.131	25.4926	25.6251	25.3182	25.5318	+	Colony A-3/WT					2	2	2	35.9	35.9	35.9	8.5517	722350000	33	1.32769	0.0245854	-0.459258	-2.49218	0.468611	0.218335	-0.45003	-1.03649	1.03931	0.0610759	-0.445636	-2.00848	D0C7F8	Uncharacterized protein
30.9244	30.7911	30.9043	30.9859	30.9827	30.9797	30.9586	30.8734	31.1965	31.1459	31.0086	31.2108	31.1125	31.1882	31.0519	31.1946	+	Colony A-3/WT	+	Colony B-3/WT			17	17	17	55.8	55.8	55.8	43.551	42398000000	341	2.36211	0.00249758	-0.235387	-4.44679	2.35402	0.0037406	-0.188242	-4.42945	0.0215124	0.928238	0.00361538	0.0631836	D0C7F9	O-succinylhomoserine sulfhydrylase
25.6117	26.2239	25.411	25.3272	25.7176	25.3405	25.3989	25.3987	25.6889	25.7504	25.428	25.8529	26.0464	25.8922	25.7658	25.9226			+	Colony B-3/WT			5	5	5	22.4	22.4	22.4	40.984	1030300000	55	0.589071	0.142016	-0.263316	-1.25075	2.2879	0.00424938	-0.442807	-4.28919	1.10168	0.0536761	-0.226731	-2.11225	D0C7G0	Hydrolase, alpha/beta domain protein
27.8433	27.2472	27.1113	27.076	27.9412	27.8083	28.0098	27.7621	27.6845	27.5451	27.6416	27.7674	27.1591	26.2026	26.9306	27.0814			+	Colony B-3/WT	+	Colony C-3/WT	6	6	6	46.8	46.8	46.8	14.12	3807300000	105	0.845225	0.0716838	0.476031	1.68578	2.42506	0.00336671	1.03694	4.58321	1.97005	0.00862794	0.816216	3.6494	D0C7G2	Uncharacterized protein
26.1693	26.2562	25.8585	26.4716	24.9313	25.4409	25.9807	25.5743	25.126	25.0144	25.4555	25.4012	25.8686	25.1427	25.7948	25.4508	+	Colony A-3/WT					2	2	2	49.4	49.4	49.4	8.5477	1030700000	39	1.60355	0.0125942	0.624674	2.97133	0.111604	0.648066	-0.0824323	-0.301259	0.786453	0.110163	-0.314953	-1.58744	D0C7G3	Uncharacterized protein
26.6536	26.7154	27.4041	27.1369	23.4483	26.8882	26.7087	23.7079	26.2719	26.4875	26.6429	26.1254	25.7312	25.3528	23.2765	25.2576	+	Colony A-3/WT			+	Colony C-3/WT	3	3	3	87	87	87	8.0294	1559700000	40	1.92997	0.00647399	2.07296	3.57243	0.095755	0.685175	0.283732	0.261937	1.40224	0.0279604	1.47738	2.61962	D0C7G4	Uncharacterized protein
24.4809	23.4019	25.8574	23.0729	26.4156	26.2485	26.4561	23.7137	23.6974	25.7965	25.6708	25.7808	25.6377	25.465	25.4321	24.459							2	2	2	42.9	42.9	42.9	9.8315	868910000	20	0.753222	0.0907122	-1.04518	-1.53156	0.263312	0.394551	0.460014	0.640747	0.00698879	0.975208	-0.0120754	-0.0208564	D0C7G5	Uncharacterized protein
30.4302	30.072	30.059	30.0178	30.1325	30.0037	29.2712	29.6099	29.5739	29.1901	28.4302	30.4302	29.1444	28.9206	29.3166	29.3253	+	Colony A-3/WT	+	Colony B-3/WT			2	2	2	23.6	23.6	23.6	10.172	16300000000	34	3.43104	0.000333333	0.968064	7.17366	1.42305	0.0217382	0.577593	2.65545	0.21454	0.497326	0.229376	0.537621	D0C7G6	YARHG domain-containing protein
29.9829	30.7501	30.5694	30.458	29.8208	30.1588	30.3135	30.3531	30.3583	29.5796	29.9231	29.9986	29.816	29.4946	29.8354	30.2514	+	Colony A-3/WT					4	4	4	43.1	43.1	43.1	14.838	22181000000	105	1.40145	0.0208429	0.590737	2.61827	0.786062	0.0959435	0.312232	1.58678	0.205974	0.50927	0.115547	0.519004	D0C7G7	Histidine triad domain protein
25.44	28.6628	27.893	28.2817	29.1006	28.5783	28.4724	28.7908	28.7314	29.0907	28.7276	29.1444	27.3052	23.7414	28.0574	28.8127							1	1	1	6.1	6.1	6.1	19.873	7739300000	35	0.171088	0.509419	0.590214	0.441392	0.766077	0.100673	1.75635	1.5532	0.868065	0.0892119	1.94435	1.72387	D0C7G9	Uncharacterized protein
27.0804	27.3053	27.3905	27.144	26.9692	27.0425	26.6589	27.0169	27.0053	26.6146	27.3627	27.2266	27.2276	27.0638	27.2315	27.3145			+	Colony B-3/WT			9	9	9	88.9	88.9	88.9	18.123	2769500000	71	0.0846046	0.702802	0.0207114	0.233694	1.49685	0.0194153	-0.287472	-2.78342	0.402928	0.294859	-0.157079	-0.915088	D0C7H0	Uncharacterized protein
28.5741	28.493	28.0563	28.6698	28.6706	28.9364	28.3417	28.5462	28.6387	28.6837	28.6181	28.2824	28.9918	28.7707	29.0326	28.961	+	Colony A-3/WT	+	Colony B-3/WT	+	Colony C-3/WT	9	9	9	27.9	27.9	27.9	33.931	8162700000	122	1.80012	0.00819151	-0.490741	-3.32807	1.21287	0.03457	-0.315285	-2.29818	1.90299	0.00951609	-0.383289	-3.52104	D0C7H1	Uncharacterized protein
23.8438	23.2555	24.166	25.7486	23.9984	23.9428	23.153	25.5263	26.0513	24.0319	23.2864	24.014	24.366	23.98	24.7595	23.2064							7	7	7	27.1	27.1	27.1	37.819	211480000	9	0.102884	0.65627	0.175506	0.279738	0.0451239	0.832883	0.0771613	0.129342	0.150362	0.609127	0.267954	0.393781	D0C7H6	Auxiliary transport protein, membrane fusion protein (MFP) family protein
26.2539	26.3669	25.8633	26.1407	25.415	25.6998	25.256	25.6791	25.5874	25.8257	24.2932	26.1731	25.5141	25.4607	26.1693	25.2462	+	Colony A-3/WT					4	4	4	27.4	27.4	27.4	24.117	1162200000	37	1.31193	0.0248689	0.558603	2.46541	0.142884	0.581563	-0.0851283	-0.376301	0.103036	0.706664	-0.127742	-0.280117	D0C7H7	Transcriptional regulator, TetR family
28.5166	28.2644	28.6829	28.2498	28.5242	28.3127	28.2835	28.2688	28.3489	28.0329	28.2893	28.6442	28.6017	28.9136	28.7957	28.5517	+	Colony A-3/WT	+	Colony B-3/WT	+	Colony C-3/WT	11	11	11	37.6	37.6	37.6	43.812	7723800000	141	1.11633	0.038459	-0.287239	-2.13667	1.9256	0.00777226	-0.368352	-3.56409	1.3661	0.0299217	-0.386827	-2.55769	D0C7H8	Lipid-A-disaccharide synthase
28.8504	28.8297	28.8896	28.9893	28.7883	28.7662	28.8979	28.6372	29.18	29.1608	29.0307	29.0277	29.1638	29.043	29.0098	28.8181			+	Colony B-3/WT			24	24	24	47.2	47.2	47.2	80.546	10062000000	435	0.72771	0.0969834	-0.118927	-1.48849	1.41604	0.0220064	-0.236263	-2.64337	0.506217	0.226334	0.0911155	1.10439	D0C7H9	TonB-dependent siderophore receptor
31.4015	31.4806	31.3198	31.4477	31.3977	31.2841	31.4341	31.4307	31.4984	31.3028	31.6387	31.6081	31.4588	31.483	31.569	31.4945	+	Colony A-3/WT	+	Colony B-3/WT			27	27	27	73.2	73.2	73.2	41.681	56486000000	502	1.09871	0.0395108	-0.0889163	-2.10731	1.45015	0.0206948	-0.114676	-2.70226	0.0469545	0.849543	0.0106921	0.134345	D0C7I4	Phospho-2-dehydro-3-deoxyheptonate aldolase
25.5912	24.7742	25.3337	25.0956	25.8978	25.9687	26.0315	26.1169	25.9716	25.3509	25.928	25.8233	25.617	25.9252	25.6815	25.6702	+	Colony A-3/WT	+	Colony B-3/WT			9	9	9	30.1	30.1	30.1	58.407	1092900000	82	1.50968	0.0158359	-0.524791	-2.80583	1.82617	0.00995064	0.280263	3.3765	0.104645	0.702971	0.04497	0.284108	D0C7I6	Histidine acid phosphatase
26.8424	26.7738	26.864	26.8193	27.2133	27.1467	27.2597	27.0074	27.3089	27.0196	26.9527	27.0571	27.239	27.085	27.3778	27.2825	+	Colony A-3/WT					6	6	6	21.9	21.9	21.9	37.365	2730600000	89	3.22833	0.000464	-0.421196	-6.58024	0.496984	0.202471	-0.0893097	-1.08781	0.813689	0.103251	-0.161504	-1.63308	D0C7I8	Nicotinate-nucleotide--dimethylbenzimidazole phosphoribosyltransferase
24.3709	24.1049	24.0005	23.7859	24.6952	23.9446	24.3163	24.5332	23.9733	23.6288	24.2326	23.4685	24.4631	24.3613	24.754	24.9775	+	Colony A-3/WT			+	Colony C-3/WT	3	3	3	19.8	19.8	19.8	19.203	359640000	37	1.67025	0.0113785	-0.573469	-3.09075	0.584746	0.159214	-0.266667	-1.2432	1.97999	0.00860576	-0.813187	-3.66861	D0C7I9	Bifunctional adenosylcobalamin biosynthesis protein
25.7021	25.9988	25.7523	25.8647	24.3865	24.9805	24.6694	25.0194	25.6031	25.4653	25.5198	25.616	25.5552	25.8163	25.8532	25.7181			+	Colony B-3/WT	+	Colony C-3/WT	11	11	11	19.2	19.2	19.2	82.067	911140000	58	0.449251	0.212592	0.0937781	1.0011	3.00837	0.00058427	-0.971769	-5.98078	1.29952	0.0340188	-0.184639	-2.44435	D0C7J2	HAD hydrolase, family IA, variant 3
27.5242	27.5724	27.615	27.5447	27.6424	27.693	27.5237	27.5295	27.6966	27.428	27.8349	27.4709	27.9239	27.9704	28.0009	27.921	+	Colony A-3/WT	+	Colony B-3/WT	+	Colony C-3/WT	10	10	10	63.1	63.1	63.1	24.614	4159100000	115	5.1132	0	-0.39001	-14.1739	3.60557	0.000172043	-0.356922	-7.71899	1.91263	0.00942275	-0.346477	-3.53936	D0C7J3	AlcB domain-containing protein
32.9703	32.9197	32.8364	32.9399	32.685	32.8456	32.626	32.6463	32.761	32.8911	32.7427	32.7849	32.6323	32.6819	32.5578	32.5791	+	Colony A-3/WT			+	Colony C-3/WT	53	53	53	82.3	82.3	82.3	85.546	137450000000	1102	3.56867	0.000361858	0.303819	7.60089	0.758896	0.102567	0.0879564	1.54112	2.24598	0.00450502	0.182155	4.2016	D0C7J7	TonB-dependent siderophore receptor
28.9393	29.0664	28.963	28.9237	29.7578	29.8073	29.9397	29.9096	29.2442	28.9183	28.9901	28.9337	28.9911	28.8888	29.1677	28.8681			+	Colony B-3/WT			12	12	12	70.1	70.1	70.1	16.922	12146000000	174	0.0263116	0.894493	-0.00581312	-0.0768859	4.43858	0	0.874673	10.8439	0.160651	0.589598	0.0426478	0.417567	D0C7K5	Cys-tRNA(Pro)/Cys-tRNA(Cys) deacylase
30.0383	30.0239	29.9252	30.0432	30.8377	30.7528	30.9197	30.6686	30.0575	29.9841	30.173	30.1283	30.0585	30.2806	30.1295	30.1176	+	Colony A-3/WT	+	Colony B-3/WT			18	18	18	48.8	48.8	48.8	52.155	25160000000	297	1.35097	0.0236042	-0.138902	-2.53185	3.9829	0.000230216	0.648146	9.01917	0.431342	0.275781	-0.0608387	-0.968084	D0C7K7	ABC1 family protein
24.2594	23.5942	22.9666	22.3281	24.8256	24.1492	25.0247	24.7929	24.7474	23.191	24.7678	24.1476	23.7305	24.9611	25.5766	24.4188	+	Colony A-3/WT					3	3	3	9.5	9.5	9.5	47.149	462490000	9	1.28778	0.02627	-1.3847	-2.42446	0.0205311	0.920464	0.0263443	0.0603649	0.368244	0.324025	-0.458294	-0.849273	D0C7K8	Acyl-CoA dehydrogenase, C-terminal domain protein
25.6806	24.0233	25.9891	22.8116	24.9847	29.0477	26.5572	26.2528	27.5032	27.1103	26.0964	29.137	23.8814	24.3808	22.8817	24.6168			+	Colony B-3/WT	+	Colony C-3/WT	4	4	4	17.7	17.7	17.7	43.497	3496700000	17	0.352965	0.286801	0.685988	0.819847	1.60217	0.0159333	2.77043	2.96887	2.50434	0.00264583	3.52154	4.75862	D0C7K9	Acyl-CoA dehydrogenase, C-terminal domain protein
24.4126	23.6987	24.0599	25.2531	24.9664	25.0836	24.3255	23.4902	23.6031	23.5531	23.7344	23.7834	24.2841	26.0809	25.3891	23.5622							4	4	4	16.7	16.7	16.7	46.703	235070000	10	0.304638	0.333577	-0.472986	-0.724788	0.216203	0.460483	-0.362603	-0.541219	1.06881	0.0583107	-1.16056	-2.05754	D0C7L0	Alkane 1-monooxygenase
23.7963	24.528	23.9723	24.3792	25.523	25.5306	25.0714	25.229	24.7688	24.6859	24.5655	24.8131	24.4077	24.9634	24.6107	24.0552			+	Colony B-3/WT			8	8	8	27.4	27.4	27.4	36.24	561760000	37	0.635736	0.124679	-0.340281	-1.33159	2.02112	0.00644469	0.82927	3.74861	0.452699	0.261109	0.199061	1.00743	D0C7L1	Transcriptional regulator, AraC family
31.8814	31.7942	31.771	31.8849	32.3898	32.4538	32.5167	32.3589	32	31.9279	31.9642	32.0144	31.9465	32.0526	32.0563	31.9827	+	Colony A-3/WT	+	Colony B-3/WT			38	38	38	72.5	72.5	72.5	68.204	86257000000	635	2.35184	0.00255288	-0.176657	-4.4248	4.10999	0	0.420279	9.49813	0.443537	0.267451	-0.0329084	-0.990599	D0C7L2	Peptidylprolyl isomerase
34.8309	34.8772	34.9327	34.7458	35.285	35.0605	35.4892	35.2488	34.7047	34.0076	34.6383	34.8406	34.5466	34.5699	34.7301	34.6206	+	Colony A-3/WT	+	Colony B-3/WT			8	8	8	65.6	65.6	65.6	9.3216	603800000000	344	2.16977	0.00360793	0.229848	4.04499	3.28902	0.000238411	0.654071	6.75361	0.137828	0.632648	-0.0689993	-0.364386	D0C7L3	DNA-binding protein HU-beta
29.851	29.9773	29.8514	29.6907	30.3751	30.071	30.2273	30.2503	29.3466	29.052	29.6653	29.4732	29.3153	29.4846	29.5077	29.4405	+	Colony A-3/WT	+	Colony B-3/WT			9	9	9	50.6	50.6	50.6	18.828	17145000000	176	2.85136	0.0008	0.405603	5.57879	4.35417	0	0.793932	10.4826	0.148206	0.613434	-0.0527296	-0.388758	D0C7L4	Poly(Hydroxyalkanoate) granule-associated protein
27.4094	27.3956	27.2948	27.7789	28.2212	28.3342	28.5717	28.1909	27.4394	27.6581	27.5511	27.2859	26.9598	27.1911	27.1124	27.0641	+	Colony A-3/WT	+	Colony B-3/WT	+	Colony C-3/WT	7	7	7	32.6	32.6	32.6	25.468	4085900000	82	1.79758	0.00818412	0.387827	3.32337	4.8147	0	1.24765	12.5974	2.29889	0.00416265	0.401739	4.31232	D0C7L5	Uncharacterized protein
29.4827	29.6748	29.0437	29.5031	29.6189	29.8398	29.5517	29.9356	29.5765	29.4178	29.0635	28.9514	29.5344	29.3128	29.3716	29.8447							8	8	8	63.1	63.1	63.1	17.095	14413000000	123	0.196997	0.466556	-0.0897479	-0.499313	0.719265	0.113986	0.220646	1.47419	0.671868	0.146343	-0.263549	-1.39357	D0C7L6	HTH-type transcriptional regulator IscR
32.3246	32.3918	32.1449	32.2498	32.7964	32.7982	32.7027	32.6361	32.1558	32.4847	32.3628	32.4989	32.4683	32.6633	32.5902	32.6019	+	Colony A-3/WT	+	Colony B-3/WT	+	Colony C-3/WT	22	22	22	70.9	70.9	70.9	44.853	115600000000	554	2.40297	0.00213268	-0.303136	-4.53506	1.44241	0.0210194	0.152425	2.68887	1.21464	0.0416287	-0.205378	-2.30115	D0C7L7	Cysteine desulfurase IscS
29.9347	29.9376	29.6939	29.7943	29.9851	30.0594	30.2483	30.0661	29.4757	29.1381	29.4411	29.7787	29.7465	29.7683	29.8689	29.6125			+	Colony B-3/WT			7	7	7	75	75	75	13.782	18177000000	218	0.531741	0.167509	0.0910878	1.14992	2.35474	0.00374545	0.340704	4.43101	1.06967	0.0583547	-0.290657	-2.05897	D0C7L8	Iron-sulfur cluster assembly scaffold protein IscU
28.0802	28.1409	28.0072	28.5059	28.7612	28.7207	29.1212	28.8984	28.0546	27.7422	28.1178	27.9145	28.4745	28.4695	28.688	28.6319	+	Colony A-3/WT	+	Colony B-3/WT	+	Colony C-3/WT	5	5	5	53.8	53.8	53.8	11.739	6888000000	76	1.66714	0.0114065	-0.382429	-3.08515	1.57392	0.0167925	0.309389	2.91878	3.04652	0.00116953	-0.608715	-6.08162	D0C7L9	Iron-binding protein IscA
29.7258	30.0225	29.6185	29.7245	29.7111	30.1009	30.2338	29.4973	29.4122	29.3014	29.7076	29.596	29.956	29.966	29.9751	30.1295	+	Colony A-3/WT			+	Colony C-3/WT	10	10	10	68.6	68.6	68.6	20.136	17953000000	194	1.29186	0.0260538	-0.23385	-2.43137	0.287043	0.368957	-0.120889	-0.689344	2.62361	0.00246667	-0.502369	-5.03057	D0C7M0	Co-chaperone protein HscB homolog
29.7942	29.7006	29.7329	29.774	30.3455	30.2392	30.3452	30.1476	29.752	29.9399	29.8135	29.9539	30.1393	30.28	30.1642	30.0823	+	Colony A-3/WT			+	Colony C-3/WT	28	28	28	55.6	55.6	55.6	67.782	21426000000	478	3.96225	0	-0.416058	-8.94341	0.81035	0.0904672	0.102921	1.62749	2.4734	0.00269625	-0.301653	-4.68965	D0C7M1	Chaperone protein HscA homolog
28.7395	29.4202	28.9039	28.7812	28.8866	29.1997	29.6586	29.118	29.0334	28.9216	28.7902	28.8589	29.6855	29.4842	29.4749	29.4767	+	Colony A-3/WT			+	Colony C-3/WT	6	6	6	61.6	61.6	61.6	12.625	11664000000	124	1.86222	0.00742537	-0.569111	-3.444	0.944744	0.0663753	-0.314565	-1.85141	3.86836	0.000213333	-0.629256	-8.60588	D0C7M2	Ferredoxin, 2Fe-2S type, ISC system
25.2855	25.3117	25.2027	25.2513	26.4228	26.516	26.5136	26.089	25.4654	25.9283	25.4091	25.4858	25.8245	26.1268	26.1981	26.2233	+	Colony A-3/WT	+	Colony B-3/WT	+	Colony C-3/WT	7	7	7	15.4	15.4	15.4	57.415	1160500000	67	3.9109	0	-0.830371	-8.75738	1.11749	0.0426732	0.292172	2.1386	1.86614	0.0103349	-0.521036	-3.45137	D0C7M3	Adenylate/guanylate cyclase catalytic domain protein
31.9625	32.0411	31.9062	31.8953	32.708	32.7514	32.8664	32.6412	31.874	31.5428	31.8588	31.4863	31.9092	31.9458	31.9792	31.9739			+	Colony B-3/WT	+	Colony C-3/WT	11	11	11	97.9	97.9	97.9	16.708	89720000000	237	0.00664142	0.971181	-0.000734329	-0.0198275	5.39021	0	0.78976	15.803	1.34758	0.0308204	-0.261545	-2.52606	D0C7M4	Histidine triad domain protein
30.2121	30.3182	30.2532	30.386	31.2845	31.3157	31.4399	31.2929	30.4566	30.408	30.3613	30.3416	30.2985	30.2978	30.3629	30.1649			+	Colony B-3/WT	+	Colony C-3/WT	55	55	55	61.8	61.8	61.8	130.72	31904000000	625	0.0718513	0.741954	0.011322	0.200762	5.87481	0	1.0522	19.0949	1.19466	0.0437997	0.110841	2.26761	D0C7M5	Transcription-repair-coupling factor
27.2513	27.2614	27.4479	27.07	27.3214	27.3049	28.0373	27.544	26.8671	26.089	26.743	26.7863	27.1093	26.7086	27.1991	27.1047			+	Colony B-3/WT			7	7	7	58.5	58.5	58.5	14.169	2827900000	71	0.851813	0.0704909	0.227238	1.69677	1.37402	0.0247075	0.521461	2.57122	1.00234	0.0657909	-0.409057	-1.94707	D0C7M6	Uncharacterized protein
28.7023	28.6087	28.811	28.9463	29.7185	29.8862	29.4516	29.8997	28.9545	28.9467	28.6387	29.13	28.8573	28.9344	28.4717	28.6028			+	Colony B-3/WT			16	16	16	80.5	80.5	80.5	35.256	10954000000	233	0.147865	0.551862	0.050518	0.387962	3.30769	0.000240535	1.02241	6.80767	0.647194	0.154508	0.200909	1.3513	D0C7M7	Dyp-type peroxidase family protein
26.1361	25.9507	25.7293	26.1109	26.906	26.7854	26.7714	26.9038	25.8985	26.0012	26.1101	26.4202	25.8777	26.0884	26.2088	25.9549			+	Colony B-3/WT			9	9	9	44	44	44	29.461	1554000000	76	0.164541	0.52074	-0.0506659	-0.426481	4.21097	0	0.809208	9.89469	0.224048	0.484566	0.0750389	0.5581	D0C7M8	Glutathione S-transferase, N-terminal domain protein
29.3379	29.5706	29.4762	29.4797	30.1782	30.4827	30.6706	30.1788	29.6398	29.4158	29.6087	29.7726	29.6826	29.6036	29.5063	29.4389			+	Colony B-3/WT			7	7	7	58.9	58.9	58.9	17.951	17848000000	116	0.603498	0.137049	-0.0917783	-1.27585	3.08576	0.000611765	0.819685	6.18667	0.22685	0.48267	0.0513668	0.5641	D0C7M9	4-hydroxy-4-methyl-2-oxoglutarate aldolase
28.1985	27.9176	27.9778	27.9879	29.5423	29.5815	29.3518	29.3715	28.3517	28.4378	28.2968	28.4182	27.4211	27.4827	27.1556	26.996	+	Colony A-3/WT	+	Colony B-3/WT	+	Colony C-3/WT	10	10	10	38.9	38.9	38.9	24.894	7223700000	111	2.95543	0.000651007	0.756632	5.84293	5.59926	0	2.19794	17.1497	4.08068	0.00026087	1.11229	9.38571	D0C7N0	Semialdehyde dehydrogenase, NAD binding domain protein
30.9273	30.8158	30.9389	30.7068	31.0818	31.2495	31.5986	31.3158	30.8342	31.4678	30.9468	30.6277	31.1026	30.4039	30.8888	30.6765			+	Colony B-3/WT			6	6	6	40.9	40.9	40.9	9.6992	41479000000	131	0.196763	0.466849	0.0792723	0.498799	1.59302	0.0162748	0.543486	2.95263	0.375632	0.317739	0.201182	0.863405	D0C7N1	30S ribosomal protein S20
27.074	27.2507	27.3452	27.0818	28.0167	28.0352	27.7393	27.7133	27.0433	26.8697	27.1567	26.8367	27.1772	27.3016	27.2985	27.1869			+	Colony B-3/WT	+	Colony C-3/WT	7	7	7	45.2	45.2	45.2	28.043	3291500000	127	0.297978	0.340822	-0.0531139	-0.711428	3.30922	0.000241611	0.635096	6.81211	1.73117	0.0143656	-0.264426	-3.20125	D0C7N2	Phosphoglycerate mutase family protein
26.7234	26.8216	26.8697	26.5408	27.6054	27.6699	27.7592	27.4192	27.0338	26.8348	27.1179	26.9595	26.6983	26.5839	26.3889	26.6638			+	Colony B-3/WT	+	Colony C-3/WT	6	6	6	29.5	29.5	29.5	32.703	2631500000	65	0.761486	0.08876	0.155158	1.54548	4.31242	0	1.02967	10.3081	2.33834	0.0037716	0.402779	4.39595	D0C7N3	3(2),5-bisphosphate nucleotidase CysQ
27.1314	27.204	26.9597	26.6508	28.2242	28.3383	28.5457	28.1922	27.2519	27.0615	27.1043	27.1168	27.6713	27.6125	28.0016	27.9198	+	Colony A-3/WT	+	Colony B-3/WT	+	Colony C-3/WT	4	4	4	57.4	57.4	57.4	13.959	4082600000	50	2.71906	0.00128093	-0.814847	-5.25554	2.26278	0.00427127	0.523756	4.23658	3.19582	0.000648045	-0.66769	-6.48883	D0C7N4	Uncharacterized protein
26.0911	26.2954	25.9238	26.0089	27.1579	27.0051	27.0109	27.1396	26.3074	25.9831	26.1222	26.4065	26.642	26.8044	26.8945	26.5995	+	Colony A-3/WT	+	Colony B-3/WT	+	Colony C-3/WT	6	6	6	37.7	37.7	37.7	28.403	1926800000	52	3.0973	0.000505495	-0.655254	-6.21784	2.28278	0.00422829	0.343293	4.27843	2.40055	0.00331613	-0.530272	-4.52978	D0C7N5	Abasic site processing protein
26.3316	26.3112	26.5153	26.412	27.2267	27.2272	27.3359	27.0525	26.904	26.575	26.456	26.3405	26.6787	27.0361	26.7115	26.851	+	Colony A-3/WT	+	Colony B-3/WT			19	19	19	44.1	44.1	44.1	64.631	2240500000	180	2.41385	0.00209406	-0.426796	-4.55871	2.09873	0.00561916	0.391262	3.9019	0.861234	0.0907699	-0.250457	-1.71248	D0C7N6	Putative phosphonate C-P lyase system protein PhnK
25.1451	25.5079	24.6922	23.2398	26.1191	25.8784	26.5312	26.1191	25.5294	25.4738	25.3984	25.4525	25.6365	25.4457	25.7825	25.7276	+	Colony A-3/WT	+	Colony B-3/WT	+	Colony C-3/WT	5	5	5	20.8	20.8	20.8	41.43	1014900000	50	1.02906	0.0459974	-1.00184	-1.99146	1.80064	0.0104879	0.513887	3.32903	1.24072	0.0385289	-0.184533	-2.34502	D0C7N7	ABC transporter, permease protein
24.4637	23.8786	24.2438	23.9642	24.2878	25.0542	23.8166	24.4648	23.914	24.1349	23.264	24.9814	24.341	24.1451	25.018	23.4941							3	3	3	9.6	9.6	9.6	35.006	258470000	28	0.122753	0.607347	-0.111969	-0.328377	0.147122	0.574017	0.156303	0.386227	0.140956	0.626878	-0.17599	-0.371766	D0C7N8	ABC transporter, permease protein
30.2456	30.2697	30.204	30.24	30.6885	30.7296	30.8646	30.6088	30.0952	30.084	30.1393	30.105	29.9004	30.2126	30.3514	30.1806			+	Colony B-3/WT			35	35	35	51.6	51.6	51.6	77.51	25951000000	428	0.354592	0.285414	0.0785952	0.822993	2.68352	0.00176947	0.561628	5.17099	0.234783	0.472513	-0.055357	-0.580995	D0C7N9	Peptidase family M3
26.7918	26.8623	26.5265	26.7371	28.0068	27.7035	28.0598	27.7178	27.1764	26.6171	26.9159	26.9397	26.997	26.931	27.1261	26.8102	+	Colony A-3/WT	+	Colony B-3/WT			13	13	13	30.2	30.2	30.2	69.071	2945500000	117	1.28423	0.0264598	-0.236661	-2.41845	3.66185	0.000178273	0.905881	7.90205	0.156097	0.598191	-0.0538192	-0.407077	D0C7P0	ABC transporter, substrate-binding protein, family 5
25.5467	24.9463	25.0685	25.423	27.0846	27.0103	26.9808	26.8664	25.7365	25.9157	26.0996	26.0403	25.8716	25.7741	26.2401	25.7229	+	Colony A-3/WT	+	Colony B-3/WT			14	14	14	32.7	32.7	32.7	67.526	1447200000	101	1.92515	0.00644914	-0.656001	-3.56321	3.88057	0.000215488	1.08335	8.64914	0.12081	0.666188	0.0458641	0.323681	D0C7P1	ABC transporter, substrate-binding protein, family 5
25.7856	25.8955	25.2395	25.88	25.9257	25.9167	26.025	25.7051	25.4112	25.2955	25.3018	25.698	25.475	25.5971	25.8004	25.5303			+	Colony B-3/WT			10	10	10	17.5	17.5	17.5	93.902	1052500000	69	0.23516	0.412747	0.0994506	0.581795	1.61242	0.0154164	0.292416	2.98713	0.719357	0.129726	-0.174074	-1.47435	D0C7P2	TonB-dependent receptor
34.1959	34.1599	34.1192	34.0847	34.6977	34.5813	34.6347	34.5165	33.8787	33.8802	33.9619	34.046	33.6197	33.8666	33.8974	33.7884	+	Colony A-3/WT	+	Colony B-3/WT			38	38	38	47.7	47.7	47.7	79.505	362590000000	918	2.69631	0.00144936	0.346897	5.2013	4.50492	0	0.814556	11.1358	1.04246	0.0604523	0.148659	2.01372	D0C7P8	Malate synthase G
31.3186	31.3827	31.2533	31.3522	32.2048	32.2973	32.203	32.2087	31.5228	31.4622	31.5184	31.5478	31.4408	31.3475	31.3154	31.4464			+	Colony B-3/WT	+	Colony C-3/WT	23	23	23	68.9	68.9	68.9	43.932	64456000000	513	0.680982	0.110176	-0.0608253	-1.40913	6.10513	0	0.840955	20.8838	1.79821	0.0124121	0.125276	3.32453	D0C7P9	Cell division protein ZapE
24.9394	24.8009	24.4997	24.699	25.1628	24.8306	24.9953	25.4074	24.4615	24.2062	24.5481	24.2344	24.4712	24.6388	24.5411	24.2497	+	Colony A-3/WT	+	Colony B-3/WT			7	7	7	25.1	25.1	25.1	38.922	513220000	41	1.08927	0.0405358	0.259534	2.09159	2.24839	0.00444933	0.623828	4.2066	0.424327	0.280552	-0.112678	-0.955072	D0C7Q0	Transcriptional regulator, AraC family
30.3917	30.4015	30.1917	30.3222	31.2721	31.4517	31.3066	31.2417	30.3414	30.4356	30.3714	30.2766	30.585	30.8056	30.7357	30.5904	+	Colony A-3/WT	+	Colony B-3/WT	+	Colony C-3/WT	14	14	14	68.1	68.1	68.1	25.339	33985000000	259	2.53431	0.00172112	-0.352407	-4.82602	3.95031	0.000227758	0.638856	8.89983	2.63365	0.00248507	-0.32292	-5.05393	D0C7Q3	Orotidine 5-phosphate decarboxylase
31.5179	31.502	31.4052	31.496	32.7036	32.6608	32.6564	32.4646	31.6746	32.0142	31.6339	31.5933	31.045	31.5506	31.238	31.2167	+	Colony A-3/WT	+	Colony B-3/WT	+	Colony C-3/WT	4	4	4	26.4	26.4	26.4	13.6	74312000000	139	1.04035	0.0451162	0.217712	2.01022	4.58855	0	1.35875	11.514	1.76654	0.0134453	0.466428	3.26607	D0C7Q4	LapA_dom domain-containing protein
33.0566	32.7008	32.7633	33.0613	32.6749	32.9168	33.0137	32.8064	32.8085	32.395	32.5771	32.5928	32.5718	32.1587	32.4317	32.2078	+	Colony A-3/WT	+	Colony B-3/WT			8	8	8	76	76	76	11.009	130280000000	249	2.18307	0.0034823	0.552987	4.07208	2.2511	0.00446022	0.510457	4.21225	1.00484	0.0655405	0.250866	1.95121	D0C7Q5	Integration host factor subunit beta
35.184	35.1669	35.1513	35.2294	35.3887	35.5379	35.2138	35.4417	35.2302	35.2643	35.1183	35.2021	35.3901	35.4203	35.4174	35.516	+	Colony A-3/WT			+	Colony C-3/WT	42	42	42	73.1	73.1	73.1	61.111	827730000000	1559	3.64137	0.000389474	-0.253022	-7.83501	0.220503	0.454656	-0.0403786	-0.550488	2.85262	0.00172043	-0.232191	-5.58194	D0C7Q6	30S ribosomal protein S1
30.4223	30.2945	30.3262	30.3493	31.1628	30.9657	31.0506	30.9841	30.1664	30.0927	30.2097	30.0923	30.3441	30.2545	30.3661	30.3197			+	Colony B-3/WT	+	Colony C-3/WT	16	16	16	81.1	81.1	81.1	25.235	29360000000	206	0.313514	0.323092	0.0269861	0.742489	5.1174	0	0.719701	14.1974	2.52161	0.00265969	-0.180839	-4.79739	D0C7Q7	Cytidylate kinase
28.5346	28.7005	28.3653	28.5811	28.4821	28.0917	28.4695	28.2978	28.2876	28.1258	28.0047	28.3315	27.6528	27.5836	27.9349	27.5787	+	Colony A-3/WT	+	Colony B-3/WT	+	Colony C-3/WT	10	10	10	75.5	75.5	75.5	16.498	5864300000	70	3.64881	0.000391534	0.857874	7.85932	2.70063	0.00178056	0.647775	5.21158	2.35286	0.00365571	0.499896	4.42697	D0C7Q8	Uncharacterized protein
27.2185	27.3449	26.9725	27.0895	27.2995	27.5613	28.1666	27.8833	27.1286	26.7459	27.216	26.915	27.5421	26.9779	27.1428	27.4419							4	4	4	45.5	45.5	45.5	18.688	3258000000	25	0.33301	0.304339	-0.119846	-0.780979	1.01378	0.0563739	0.451493	1.96607	0.813451	0.10322	-0.274791	-1.63268	D0C7Q9	tRNA-specific adenosine deaminase
31.2427	31.2837	31.2559	31.3162	31.9176	32.0407	31.8685	31.9558	31.4759	31.438	31.3664	31.3343	31.3991	31.4158	31.4426	31.5697	+	Colony A-3/WT	+	Colony B-3/WT			25	25	25	82.1	82.1	82.1	41.936	60370000000	444	2.31277	0.00273263	-0.182203	-4.34163	4.03345	0.000241509	0.488856	9.20706	0.47815	0.242845	-0.0531688	-1.05381	D0C7R0	Enoyl-CoA hydratase/isomerase family protein
29.3276	29.3374	29.2417	29.1231	29.9591	30.0329	29.9023	29.8426	29.4667	29.5017	29.2639	29.4563	29.6639	29.7547	29.6561	29.6505	+	Colony A-3/WT	+	Colony B-3/WT	+	Colony C-3/WT	10	10	10	52.3	52.3	52.3	26.945	16112000000	189	3.58281	0.00037	-0.423828	-7.64597	2.74893	0.00154943	0.252901	5.32734	2.33598	0.00376579	-0.259162	-4.39093	D0C7R1	Uracil-DNA glycosylase
28.6039	28.3163	28.2819	28.3431	29.5199	29.1494	28.9288	29.0721	28.1875	28.0884	28.1215	28.6734	28.6083	28.675	28.5273	28.6442	+	Colony A-3/WT	+	Colony B-3/WT	+	Colony C-3/WT	5	5	5	31.3	31.3	31.3	22.856	8092400000	104	1.52678	0.0154798	-0.227417	-2.83577	2.27421	0.00429244	0.553839	4.26046	1.31089	0.0332759	-0.346021	-2.46363	D0C7R2	Uncharacterized protein
25.9178	25.9678	25.7942	25.797	26.4712	26.4337	26.5789	26.5388	25.6537	25.8491	25.8717	25.8601	26.4352	25.8137	26.1253	26.0741			+	Colony B-3/WT	+	Colony C-3/WT	9	9	9	45.8	45.8	45.8	35.811	1418300000	62	0.915034	0.060627	-0.242868	-1.80204	1.61418	0.0153912	0.393562	2.99027	1.15702	0.0477502	-0.30343	-2.2046	D0C7R3	Type II secretion system protein K
24.2612	22.8232	22.7744	24.6849	23.9321	23.2333	23.5203	25.0219	23.2984	22.6778	24.1927	24.1356	22.636	23.4479	24.5401	23.2915							2	2	2	19.8	19.8	19.8	13.975	124580000	13	0.0906949	0.687114	0.157053	0.249182	0.345244	0.309402	0.448025	0.804868	0.0644802	0.801925	0.0972662	0.181402	D0C7R5	General secretion pathway protein I
27.9334	28.1338	27.9436	27.6913	28.4719	28.633	28.3022	28.3978	27.5491	27.8365	27.7538	27.9075	27.7714	27.7667	28.0136	28.0396			+	Colony B-3/WT			4	4	4	27.9	27.9	27.9	23.911	5198700000	42	0.0853948	0.700729	0.0276685	0.235712	2.78605	0.00133111	0.553383	5.41751	0.59764	0.176089	-0.136107	-1.26567	D0C7R7	Transcriptional regulator, TetR family
29.9796	30.1946	29.8808	30.0313	30.654	30.6984	30.7932	30.5292	29.8793	29.662	30.0414	30.0192	29.9969	30.1016	30.1759	30.1187			+	Colony B-3/WT			8	8	8	47.5	47.5	47.5	28.835	23494000000	172	0.457348	0.207634	-0.0766716	-1.01594	3.86693	0.000211921	0.570459	8.60082	1.08523	0.0560975	-0.197816	-2.08485	D0C7R8	Hydrolase, TatD family
26.6427	25.9904	26.2932	26.4151	27.3959	27.2719	27.1803	27.2302	26.3593	26.2059	26.4892	26.3958	26.5354	26.5232	26.4277	26.7739			+	Colony B-3/WT			6	6	6	24.5	24.5	24.5	37.594	2102300000	71	0.726387	0.0971929	-0.229719	-1.48625	3.72405	0.000190476	0.704533	8.10865	1.12225	0.0514042	-0.202517	-2.14654	D0C7S0	Putative DNA polymerase III, delta subunit
30.2765	30.2876	30.1393	30.3624	30.8504	30.8434	31.1681	30.8636	30.1145	30.216	30.2253	29.9758	30.4922	30.3072	30.3066	30.5004			+	Colony B-3/WT	+	Colony C-3/WT	17	17	17	81	81	81	28.362	28222000000	315	0.963334	0.0530171	-0.135116	-1.88229	2.82487	0.00115862	0.529784	5.51297	1.82165	0.0117719	-0.268682	-3.36807	D0C7S1	3-deoxy-manno-octulosonate cytidylyltransferase
25.1766	25.3908	25.4536	25.5372	26.1536	26.3855	26.6579	25.8779	25.2138	25.4346	25.2446	24.4751	25.5991	25.5579	25.6499	25.4501	+	Colony A-3/WT	+	Colony B-3/WT	+	Colony C-3/WT	8	8	8	40.8	40.8	40.8	37.403	1034700000	65	1.02565	0.0463787	-0.174708	-1.98579	2.20132	0.00479524	0.704476	4.10942	1.14861	0.0483614	-0.47225	-2.19055	D0C7S2	Tetraacyldisaccharide 4-kinase
29.7941	29.7352	29.7865	29.9378	30.626	30.7414	30.7577	30.687	29.5263	29.9839	29.6716	29.7573	30.001	30.0335	30.1014	29.8707	+	Colony A-3/WT	+	Colony B-3/WT	+	Colony C-3/WT	19	19	19	52.3	52.3	52.3	64.048	22150000000	340	1.56005	0.0142918	-0.188276	-2.89428	4.76289	0	0.701363	12.3411	1.32505	0.0321286	-0.2669	-2.4877	D0C7S3	Lipid A export ATP-binding/permease protein MsbA
29.9588	29.9525	29.815	29.9851	30.645	30.6697	30.7413	30.5586	30.1169	29.9151	29.8705	30.1439	30.1492	30.3782	30.3073	30.2214	+	Colony A-3/WT	+	Colony B-3/WT	+	Colony C-3/WT	13	13	13	51.2	51.2	51.2	33.283	24237000000	233	2.75508	0.00111278	-0.33616	-5.34221	3.10095	0.000615385	0.389645	6.22771	1.59221	0.0191976	-0.252383	-2.95118	D0C7S6	ParB-like protein
29.9088	29.9905	30.095	29.95	30.8309	30.6974	30.9133	30.722	30.1145	29.9096	30.0087	30.0921	30.2918	30.1657	30.3401	30.2643	+	Colony A-3/WT	+	Colony B-3/WT	+	Colony C-3/WT	15	15	15	61.5	61.5	61.5	28.127	25373000000	305	2.67298	0.00143706	-0.279361	-5.14609	3.82653	0.000205788	0.525417	8.4591	2.12378	0.00614845	-0.234267	-3.95204	D0C7S7	Sporulation initiation inhibitor protein Soj
29.7529	29.7455	29.6577	29.8548	30.488	30.4193	30.6077	30.3117	29.7913	29.4469	29.8635	29.7588	30.5332	30.4252	30.4941	30.3838	+	Colony A-3/WT			+	Colony C-3/WT	15	15	15	81	81	81	23.719	23042000000	266	4.98276	0	-0.706351	-13.4634	0.0114467	0.957793	-0.00239801	-0.0339906	3.56595	0.000378182	-0.743965	-7.59226	D0C7S8	Ribosomal RNA small subunit methyltransferase G
28.9237	28.8824	28.8508	28.8387	29.6695	29.5511	29.8376	29.7413	28.7409	28.6536	28.8941	29.0038	29.2033	29.304	29.4232	29.2069	+	Colony A-3/WT	+	Colony B-3/WT	+	Colony C-3/WT	15	15	15	69.4	69.4	69.4	25.341	11847000000	212	3.5162	0.000349057	-0.41045	-7.43561	2.7051	0.00178336	0.415513	5.2222	2.57606	0.00247143	-0.461268	-4.92096	D0C7S9	Nucleotidyl transferase
29.8847	29.8304	29.7751	29.9618	30.5041	30.5059	30.5268	30.626	29.7455	29.6241	29.8976	29.6817	30.1105	30.1731	30.136	30.2201	+	Colony A-3/WT	+	Colony B-3/WT	+	Colony C-3/WT	17	17	17	64	64	64	39.641	22083000000	240	3.16329	0.000446154	-0.296912	-6.39835	4.27819	0	0.380784	10.1669	3.25285	0.000542773	-0.422668	-6.64985	D0C7T0	Phosphotransferase enzyme family
31.9107	31.9098	31.8193	31.9163	32.3797	32.2205	32.2985	32.3806	31.8733	31.7396	31.7957	32.0425	31.6149	31.6257	31.7328	31.5625	+	Colony A-3/WT	+	Colony B-3/WT	+	Colony C-3/WT	41	41	41	64.2	64.2	64.2	92.486	78870000000	886	3.00851	0.000592083	0.255056	5.98113	4.91269	0	0.685839	13.0957	1.64906	0.0168313	0.228785	3.05265	D0C7T1	LPS-assembly protein LptD
32.9123	32.8799	32.8766	32.9692	33.1528	33.4433	33.3887	33.4564	32.832	32.551	33.0039	32.9877	32.727	32.6835	32.7705	32.74	+	Colony A-3/WT	+	Colony B-3/WT			30	30	30	71.2	71.2	71.2	49.578	160610000000	579	3.16168	0.000445298	0.179254	6.3939	3.87665	0.000213333	0.630055	8.63522	0.484224	0.239219	0.113411	1.06481	D0C7T2	Chaperone SurA
33.7398	33.7388	33.6631	33.7716	34.556	34.5961	34.5244	34.5997	33.6403	33.84	33.6897	33.7548	33.6944	33.6464	33.5009	33.7292			+	Colony B-3/WT			24	24	24	79.7	79.7	79.7	37.354	320270000000	747	0.76384	0.0882421	0.0856047	1.54944	5.63324	0	0.926341	17.3787	0.638293	0.15849	0.088479	1.336	D0C7T3	Fructose-1,6-bisphosphate aldolase
25.0581	26.7773	25.1619	26.2424	27.4332	27.5046	27.0892	26.7985	23.7895	23.1243	27.0711	26.2622	23.8974	25.8352	27.0565	24.1725			+	Colony B-3/WT			1	1	1	23.5	23.5	23.5	8.9611	2264200000	27	0.276908	0.363998	0.569522	0.668706	1.38469	0.024123	1.96598	2.58952	0.0520346	0.835723	-0.178627	-0.14814	D0C7T4	Uncharacterized protein
33.7349	33.7791	33.878	33.8984	34.6505	34.7106	34.4954	34.702	33.6686	33.6005	33.5282	33.5209	33.5023	33.5743	33.5053	33.7175	+	Colony A-3/WT	+	Colony B-3/WT			26	26	26	89.1	89.1	89.1	41.275	322900000000	997	2.08901	0.0042714	0.24776	3.88253	5.26059	0	1.06479	15.0197	0.026197	0.911675	0.00468349	0.0765604	D0C7T5	Phosphoglycerate kinase
25.2234	25.2473	25.1187	24.6669	23.218	25.1809	25.5771	25.6267	23.0225	25.0204	26.3564	24.2836	24.8738	24.1767	23.4082	23.4875	+	Colony A-3/WT					4	4	4	58.3	58.3	58.3	13.965	535310000	15	1.5784	0.0135311	1.07752	2.92671	0.661161	0.131357	0.914113	1.37526	0.38487	0.310509	0.684165	0.880986	D0C7T6	Uncharacterized protein
24.9051	25.206	25.1163	23.0759	25.6773	25.4499	25.4628	25.4467	24.6821	24.4718	24.8614	25.1647	25.241	24.8729	25.2281	24.6571			+	Colony B-3/WT			5	5	5	38.7	38.7	38.7	24.202	640200000	36	0.347633	0.291215	-0.42396	-0.809511	1.79819	0.0105233	0.509367	3.32449	0.449231	0.263575	-0.204786	-1.00107	D0C7T7	Nucleoside triphosphate pyrophosphatase
28.955	28.7558	28.6756	28.9325	29.7931	29.94	29.9887	30.0737	29.0091	28.7912	29.1503	29.0351	29.2498	29.3271	29.4512	29.3995	+	Colony A-3/WT	+	Colony B-3/WT	+	Colony C-3/WT	17	17	17	61.5	61.5	61.5	43.884	13112000000	209	3.20537	0.000451362	-0.527183	-6.51556	3.71258	0.000187683	0.591994	8.0702	2.22163	0.00466667	-0.360495	-4.15121	D0C7T8	Cupin family protein
28.1162	28.2852	27.9532	27.8926	28.85	29.0935	28.4193	28.5892	27.4956	27.8674	28.3845	28.2317	27.6556	27.9549	27.4098	28.0175			+	Colony B-3/WT			6	6	6	36.2	36.2	36.2	21.941	5845800000	78	0.925985	0.058876	0.302368	1.82024	2.51915	0.00254958	0.978573	4.79185	0.430555	0.276249	0.235329	0.966627	D0C7T9	Transcriptional regulator, TetR family
28.3189	27.7788	28.6284	28.2267	29.0445	28.9201	29.0926	28.938	27.8466	27.9672	28.2967	27.949	28.1886	28.6154	28.2203	28.5827			+	Colony B-3/WT	+	Colony C-3/WT	7	7	7	68.6	68.6	68.6	11.742	7182100000	93	0.332803	0.304337	-0.163528	-0.780572	2.57082	0.00209158	0.597045	4.90898	1.3757	0.0294536	-0.386858	-2.57411	D0C7U0	Biofilm growth-associated repressor
28.2785	28.3481	28.1676	28.0721	29.4208	29.5578	29.3133	29.0008	28.1292	28.9349	28.4595	28.6321	28.6641	29.0188	28.992	28.7353	+	Colony A-3/WT	+	Colony B-3/WT			3	3	3	8.5	8.5	8.5	41.593	8945400000	48	2.96691	0.000655405	-0.635954	-5.87262	1.71261	0.0124945	0.470612	3.16744	0.821004	0.101539	-0.313612	-1.64532	D0C7U1	Serine/threonine transporter SstT
31.5658	31.5514	31.4815	31.2508	31.5023	31.6094	32.2028	31.7839	31.1347	30.6845	31.3014	31.6548	31.896	31.8731	32.2642	32.3156	+	Colony A-3/WT			+	Colony C-3/WT	7	7	7	53.9	53.9	53.9	20.264	63413000000	149	2.3945	0.00211966	-0.624815	-4.51668	0.801595	0.0924365	-0.31261	-1.61283	2.06257	0.00739791	-0.893384	-3.83009	D0C7U3	Uncharacterized protein
28.4695	28.5331	28.645	28.6758	29.5461	29.6983	29.6263	29.5354	28.5412	28.727	28.6348	28.7097	28.6912	28.4785	28.4952	28.2443			+	Colony B-3/WT			15	15	15	30.6	30.6	30.6	68.462	9573800000	169	0.449786	0.212317	0.103557	1.00208	4.55217	0	1.12422	11.348	0.880847	0.0869491	0.175861	1.74516	D0C7U4	ABC transporter, ATP-binding protein
26.9251	27.2042	26.8998	26.8145	28.235	28.043	27.9642	28.2078	26.5274	26.7124	26.6657	26.8118	26.7378	26.8027	26.6923	26.8641	+	Colony A-3/WT	+	Colony B-3/WT			4	4	4	45.2	45.2	45.2	16.549	3009300000	72	1.04566	0.0445049	0.186692	2.01904	5.69439	0	1.33829	17.7985	0.649487	0.154463	-0.0948906	-1.35524	D0C7U5	MaoC-like protein
28.0239	27.7705	27.7553	27.7387	28.2321	28.4605	28.6098	28.2924	27.981	27.9943	27.6087	27.55	27.9331	27.6882	27.76	27.7287			+	Colony B-3/WT			8	8	8	43.4	43.4	43.4	38.407	4990700000	110	0.204459	0.456924	0.0445819	0.515693	3.07306	0.000605825	0.621181	6.15253	0.0155156	0.947239	0.00597191	0.045867	D0C7U6	Transcriptional regulator, AraC family
29.3369	29.6832	29.4718	29.4017	29.5808	29.4009	29.8455	29.0092	28.7818	28.6899	28.9463	29.5326	29.2774	29.672	29.5292	29.3627					+	Colony C-3/WT	2	2	2	17.7	17.7	17.7	13.553	13161000000	48	0.0392832	0.848031	0.013092	0.113262	0.00204353	0.992207	-0.00120401	-0.0061327	1.19352	0.0438579	-0.472641	-2.2657	D0C7U7	Glycine cleavage system H protein
26.8077	26.6047	26.1534	26.5094	27.0137	26.7666	27.0183	26.765	26.4061	26.0142	25.8597	26.0627	25.9298	25.7551	26.3036	25.9444	+	Colony A-3/WT	+	Colony B-3/WT			7	7	7	49.6	49.6	49.6	26.449	1691200000	93	1.61741	0.0120671	0.535579	2.99603	3.26288	0.000235294	0.90767	6.67849	0.257598	0.442223	0.10244	0.628901	D0C7U8	NAD-dependent deacetylase
29.7503	29.5268	28.8565	29.1388	29.5744	30.0593	29.4842	29.0909	28.8429	29.6018	28.9773	29.0441	28.7522	29.0984	28.6193	28.7426	+	Colony A-3/WT	+	Colony B-3/WT			5	5	5	13.3	13.3	13.3	53.678	12180000000	82	1.2126	0.0311024	0.514983	2.29772	1.80848	0.0102874	0.749101	3.34359	0.792039	0.108495	0.313405	1.59681	D0C7U9	Sodium/proline symporter
25.6447	25.296	25.4526	25.2051	26.8113	26.5312	26.5002	26.2054	25.9918	25.8066	25.8474	25.8159	25.7937	26.0097	26.0833	25.6194	+	Colony A-3/WT	+	Colony B-3/WT			4	4	4	29	29	29	18.275	1255000000	62	1.80584	0.00813067	-0.476943	-3.33869	2.10114	0.00562557	0.635476	3.9067	0.0336474	0.888734	-0.0111132	-0.097573	D0C7V0	Leucine responsive regulatory protein
32.1159	32.0623	32.0847	32.2348	32.4272	32.3314	32.4078	32.3312	32.2806	32.4249	32.2903	32.3902	32.8459	33.0282	32.8934	32.8642	+	Colony A-3/WT	+	Colony B-3/WT	+	Colony C-3/WT	62	62	62	65.6	65.6	65.6	138.87	115080000000	1237	5.06315	0	-0.783488	-13.8972	4.48151	0	-0.533493	-11.032	4.29809	0.000305732	-0.561412	-10.2487	D0C7V1	Bifunctional protein PutA
29.5782	29.6895	29.7362	29.7019	30.2448	30.1952	30.1031	30.2483	29.4146	29.3167	29.4677	29.2552	29.7762	29.5592	29.7463	29.9371			+	Colony B-3/WT	+	Colony C-3/WT	18	18	18	65.1	65.1	65.1	42.118	17452000000	288	0.407551	0.239084	-0.078227	-0.923766	2.71369	0.00179463	0.443183	5.24269	2.29156	0.00420329	-0.391108	-4.29688	D0C7V3	tRNA/tmRNA (uracil-C(5))-methyltransferase
27.4534	27.6921	27.7554	27.6259	27.008	27.2151	27.7978	26.8858	27.1504	26.4722	27.581	27.3369	28.1222	28.3197	28.1799	28.3749	+	Colony A-3/WT	+	Colony B-3/WT	+	Colony C-3/WT	3	3	3	56.6	56.6	56.6	8.7028	4124700000	84	3.38447	0.000321739	-0.617465	-7.03365	2.5475	0.00223512	-1.02251	-4.85588	2.4077	0.00333766	-1.11407	-4.54534	D0C7V4	Uncharacterized protein
26.3343	26.1588	26.5547	26.4331	27.3006	27.6616	27.1298	27.2295	26.4597	26.828	26.093	26.3884	25.9102	26.2338	26.4483	26.689			+	Colony B-3/WT			9	9	9	43.4	43.4	43.4	28.86	2079100000	57	0.0987087	0.666757	0.0499024	0.269337	2.61193	0.00199095	1.01002	5.00349	0.217667	0.493	0.121923	0.544379	D0C7V5	NAGPA domain-containing protein
32.6442	32.7325	32.4713	32.4401	33.8665	33.9072	33.6719	33.8211	32.795	32.8365	32.8421	32.8755	31.8993	32.2693	32.093	32.1884	+	Colony A-3/WT	+	Colony B-3/WT	+	Colony C-3/WT	13	13	13	75.5	75.5	75.5	21.012	165130000000	432	2.31082	0.0027262	0.459534	4.33751	5.71995	0	1.70414	17.9768	3.95241	0.000228571	0.724768	8.90748	D0C7V7	YceI-like domain protein
27.1609	27.1295	27.0821	27.5161	28.1343	28.4345	28.4045	27.9096	27.4101	27.2037	27.6195	27.608	27.2993	27.7444	27.1126	27.4426			+	Colony B-3/WT			4	4	4	43.7	43.7	43.7	14.756	4105300000	96	0.486196	0.190738	-0.177577	-1.06837	2.39348	0.00371733	0.821023	4.51445	0.138648	0.631261	0.0606298	0.366322	D0C7V8	OsmC-like protein
32.6636	32.5286	32.6485	32.6997	33.4511	33.554	33.5312	33.4495	32.7438	32.7865	32.664	32.6977	33.1043	33.1111	33.1408	33.1694	+	Colony A-3/WT	+	Colony B-3/WT	+	Colony C-3/WT	37	37	37	69.6	69.6	69.6	72.258	168160000000	705	4.77782	0	-0.496327	-12.4145	4.65217	0	0.365024	11.8097	4.95682	0	-0.408417	-13.3262	D0C7V9	Transketolase
32.2626	32.0958	32.235	32.4885	33.1547	33.2957	33.2693	33.102	32.3904	32.5318	32.227	32.3244	32.5609	32.7382	32.5416	32.4698	+	Colony A-3/WT	+	Colony B-3/WT	+	Colony C-3/WT	25	25	25	68.8	68.8	68.8	41.974	129930000000	622	1.67123	0.0113058	-0.307166	-3.09253	3.85577	0.000209836	0.627792	8.56146	1.29802	0.0341706	-0.209223	-2.44181	D0C7W0	S-adenosylmethionine synthase
28.0836	27.7933	27.7312	27.7064	28.7481	28.9595	28.9282	28.7003	27.8447	28.0378	27.7305	27.7629	28.2203	28.0687	28.4115	28.387	+	Colony A-3/WT	+	Colony B-3/WT	+	Colony C-3/WT	4	4	4	43.5	43.5	43.5	20.463	6066600000	88	2.02347	0.00490323	-0.443257	-3.7532	2.80909	0.00121769	0.562151	5.47403	2.17416	0.00553121	-0.427903	-4.05392	D0C7W3	FxsA cytoplasmic membrane protein
28.2612	28.2851	28.1661	28.3382	29.1347	29.0161	29.0118	28.9686	28.3555	28.1908	28.3048	28.5044	27.5851	27.6569	27.7661	27.4751	+	Colony A-3/WT	+	Colony B-3/WT	+	Colony C-3/WT	13	13	13	52.6	52.6	52.6	30.568	6602500000	143	3.98958	0	0.64183	9.04379	5.98709	0	1.41199	19.9475	3.70431	0.000191235	0.718073	8.04257	D0C7W4	Penicillin-binding protein, transpeptidase domain protein
25.4527	25.5644	25.6022	25.5951	26.6157	26.3205	26.4206	26.5599	25.7072	25.8444	26.1051	25.8411	26.1248	26.2822	26.6242	25.8151	+	Colony A-3/WT					4	4	4	24.9	24.9	24.9	20.306	1372400000	47	2.06213	0.0046214	-0.658001	-3.82922	0.721022	0.113533	0.267567	1.47717	0.910972	0.0807305	-0.337125	-1.79528	D0C7W5	Toxin-antitoxin system, toxin component, GNAT family
24.3621	23.7293	23.8463	23.6014	25.0206	25.0211	24.2115	25.0737	23.7005	22.9234	23.3582	23.8873	22.1792	24.5111	23.7826	23.9729			+	Colony B-3/WT			3	3	3	21.3	21.3	21.3	22.197	300050000	9	0.205065	0.456824	0.27335	0.517019	1.18308	0.0370883	1.22028	2.2482	0.0968047	0.72212	-0.144086	-0.26457	D0C7W6	DNA-binding helix-turn-helix protein
27.0069	26.972	26.978	26.8611	26.3321	26.5653	26.6334	26.6404	26.3473	24.8932	26.1882	26.4765	26.1592	26.3709	26.3253	26.6206	+	Colony A-3/WT					3	3	3	29.8	29.8	29.8	19.445	1936200000	20	2.94548	0.000644518	0.585522	5.81728	0.706431	0.117765	0.173822	1.45243	0.469844	0.248816	-0.392704	-1.03873	D0C7W8	Crossover junction endodeoxyribonuclease RuvC
24.0795	24.1432	23.9552	23.8656	24.7273	24.4204	24.5176	24.9598	23.6792	24.2148	23.6043	24.1338	24.0778	24.1393	24.0232	24.8966							5	5	5	13.8	13.8	13.8	53.384	333650000	18	0.60183	0.137717	-0.273318	-1.27295	0.77267	0.0989731	0.37206	1.56429	0.711085	0.132976	-0.376208	-1.46033	D0C7W9	ADP-dependent (S)-NAD(P)H-hydrate dehydratase
24.9163	25.5095	22.9715	25.0429	25.4722	25.6012	25.9064	25.6242	24.6044	25.5962	25.4743	24.8413	24.0431	25.4702	25.9265	25.0649							8	8	8	29.6	29.6	29.6	40.776	747180000	47	0.316383	0.320629	-0.516126	-0.748186	0.602509	0.15281	0.524821	1.27413	0.00205332	0.993341	0.00288534	0.00616203	D0C7X0	Epoxyqueuosine reductase
31.141	31.1478	30.9843	30.9668	32.0704	32.1357	32.2365	32.1424	31.0561	30.9591	31.2684	31.2577	31.7803	31.7313	31.7713	31.7936	+	Colony A-3/WT	+	Colony B-3/WT	+	Colony C-3/WT	22	22	22	64.9	64.9	64.9	37.167	63030000000	438	5.08004	0	-0.709166	-13.99	4.30289	0	0.377116	10.2685	3.74323	0.000195918	-0.633792	-8.17328	D0C7X1	Biotin synthase
24.9944	25.4395	24.6471	25.0976	26.3342	26.5416	26.8173	26.3369	24.6668	24.8695	25.0928	24.7491	24.5829	22.8061	23.1929	24.2104	+	Colony A-3/WT	+	Colony B-3/WT	+	Colony C-3/WT	7	7	7	50	50	50	28.001	772700000	36	1.62037	0.0119563	1.34656	3.0013	3.19425	0.000226415	2.80939	6.48443	1.43613	0.0261321	1.14644	2.67803	D0C7X5	Gram-negative pili assembly chaperone domain protein
26.9538	27.1686	27.2864	27.0958	28.4933	28.7344	28.4847	28.4127	28.0679	27.7093	27.671	27.691	27.2914	27.228	27.0166	27.0074			+	Colony B-3/WT	+	Colony C-3/WT	6	6	6	57.1	57.1	57.1	17.964	4349900000	100	0.0332464	0.869563	-0.00970554	-0.0964499	5.04918	0	1.39542	13.8209	2.79371	0.00189256	0.648942	5.43625	D0C7Y1	Uncharacterized protein
23.3066	23.972	24.6798	23.6238	25.6205	23.1774	23.3389	22.4437	25.0068	23.5267	25.1345	24.9563	23.9805	23.0058	24.5179	23.0947							5	5	5	12.4	12.4	12.4	48.788	84535000	25	0.208892	0.451506	0.245828	0.525366	0.00196673	0.992099	-0.00458622	-0.00590275	0.984892	0.0686953	1.00635	1.91809	D0C7Y6	Site-specific recombinase, phage integrase family
27.3862	27.1829	27.3504	27.1275	27.3694	27.3776	27.5525	27.4815	27.352	27.2834	27.4079	27.1776	27.1989	27.3028	27.6132	27.4921							17	17	17	41.2	41.2	41.2	70.157	3482000000	118	0.586405	0.142858	-0.139973	-1.2461	0.163096	0.54322	0.0435281	0.423174	0.403161	0.294997	-0.0965014	-0.915527	D0C7Y8	DUF87 domain-containing protein (Fragment)
29.2827	29.229	29.0836	29.2403	29.377	29.5064	29.4111	29.2953	29.334	29.2495	29.26	29.1552	29.2191	29.5368	29.2703	29.2244							19	19	19	52.1	52.1	52.1	50.523	13637000000	264	0.554808	0.156198	-0.103745	-1.19071	0.433113	0.240673	0.0848031	0.971362	0.316973	0.374423	-0.0629592	-0.749357	D0C7Y9	SIR2_2 domain-containing protein
28.1492	28.0342	27.9814	27.9328	28.4546	28.2192	28.4617	28.2056	28.3896	28.0998	28.2674	28.3354	27.826	27.8413	27.8677	27.7262	+	Colony A-3/WT	+	Colony B-3/WT	+	Colony C-3/WT	7	7	7	23.6	23.6	23.6	36.929	5535400000	92	2.01997	0.00499496	0.209077	3.74636	3.27567	0.000237885	0.519985	6.71515	3.2106	0.000666667	0.457744	6.53024	D0C7Z0	T5orf172 domain-containing protein
27.0493	27.5069	27.0264	27.0437	27.0514	27.3153	27.5244	27.1552	27.6304	27.1982	27.4937	27.4462	27.4706	27.419	27.0549	27.887							6	6	6	90.5	90.5	90.5	10.9	3322300000	72	0.709981	0.101718	-0.301294	-1.45845	0.441025	0.236275	-0.196301	-0.985972	0.0280231	0.906368	-0.0157561	-0.0817397	D0C7Z1	Uncharacterized protein
30.8409	30.7695	30.7939	30.8308	31.092	31.0706	30.9649	31.0419	30.8856	30.9536	30.9588	31.075	30.5337	30.5922	30.6502	30.7124	+	Colony A-3/WT	+	Colony B-3/WT	+	Colony C-3/WT	35	35	35	64.9	64.9	64.9	71.749	37181000000	444	2.37312	0.00246229	0.186651	4.47048	3.94305	0.000226148	0.420221	8.87344	3.1295	0.000857881	0.346127	6.30542	D0C7Z2	Helicase ATP-binding domain-containing protein
29.4125	29.3713	29.144	29.2763	29.6821	29.5159	29.5013	29.5759	29.519	29.4104	29.4671	29.264	29.4718	29.7203	29.7215	29.5667	+	Colony A-3/WT			+	Colony C-3/WT	26	26	26	34.7	34.7	34.7	95.803	14325000000	352	2.01108	0.00508325	-0.318996	-3.72901	0.289341	0.366633	-0.0512385	-0.694001	1.32397	0.0323712	-0.204887	-2.48585	D0C7Z3	Uncharacterized protein (Fragment)
26.8708	27.0067	26.7182	26.7099	27.2566	26.7183	26.8422	26.9242	26.8841	26.7688	27.3166	27.3296	26.7965	27.1136	27.1699	26.8577							9	9	9	33.4	33.4	33.4	35.81	2598000000	71	0.651781	0.119658	-0.158021	-1.35918	0.124397	0.618961	-0.0490694	-0.332341	0.208609	0.505479	0.0903645	0.524749	D0C7Z4	Uncharacterized protein
28.9212	28.8881	29.0365	29.0435	29.4605	28.8948	29.3805	28.928	29.0688	28.9593	29.0053	29.0096	26.0876	26.0564	26.0167	26.1933	+	Colony A-3/WT	+	Colony B-3/WT	+	Colony C-3/WT	7	6	6	43	38.2	38.2	21.756	8283800000	68	8.49938	0	2.88381	52.6061	6.01214	0	3.07745	20.1427	9.10659	0	2.92225	66.4341	D0C7Z9	Transcriptional regulator, TetR family
27.1878	27.2836	27.0273	27.2034	27.7392	27.3435	27.6899	27.6521	27.2148	26.8377	27.5319	27.8477	26.9389	27.2169	27.2411	26.7928			+	Colony B-3/WT			10	10	10	57.5	57.5	57.5	20.345	3166900000	96	0.478034	0.195311	0.128113	1.0536	2.12882	0.00546002	0.558775	3.96217	0.607218	0.171836	0.310615	1.2823	D0C800	Acyltransferase
31.689	31.9764	31.6452	31.4649	31.7338	31.7879	31.6782	31.7927	31.4915	31.6898	31.7458	31.7426	31.9547	32.187	32.2634	32.3306	+	Colony A-3/WT	+	Colony B-3/WT	+	Colony C-3/WT	13	13	13	73.9	73.9	73.9	27.012	74864000000	278	1.97609	0.00567423	-0.490067	-3.66107	2.6358	0.00194809	-0.435802	-5.05893	2.6485	0.00251796	-0.516529	-5.0886	D0C801	Probable transcriptional regulatory protein HMPREF0010_00881
25.9759	26.1936	25.9723	25.6613	26.3984	25.8957	25.6799	26.0641	25.7078	25.8577	26.0516	26.2447	26.0638	26.0959	26.3318	25.6664							6	6	6	38.8	38.8	38.8	18.59	1307500000	41	0.198944	0.463604	-0.0886989	-0.5036	0.0512804	0.81344	-0.0299482	-0.1461	0.15715	0.596179	-0.0739951	-0.409507	D0C802	Transcriptional regulator, AsnC family
29.7384	29.7109	29.6064	29.2393	29.4733	29.5969	29.3578	29.5912	29.6097	29.4096	29.5776	29.6763	29.6357	29.7429	29.8919	29.9137			+	Colony B-3/WT	+	Colony C-3/WT	11	11	11	55.5	55.5	55.5	27.72	15797000000	207	0.841257	0.0725494	-0.222333	-1.67916	1.81812	0.0100687	-0.291262	-3.3615	1.40656	0.0276856	-0.227752	-2.62706	D0C804	Glutamine ABC transporter, ATP-binding protein GlnQ
25.7912	25.7928	25.5731	25.6447	25.5888	25.7381	25.7893	25.6978	25.5806	26.7662	25.9909	25.7181	25.7123	26.1023	26.0796	25.9999	+	Colony A-3/WT	+	Colony B-3/WT			2	2	2	9.3	9.3	9.3	25.16	1177300000	17	1.38809	0.0216999	-0.273067	-2.59534	1.45897	0.0204101	-0.270049	-2.71755	0.0507152	0.839706	0.0404305	0.14457	D0C805	Glutamate/aspartate transport system permease protein GltK
26.3737	25.9706	26.1451	26.0092	26.0482	26.4716	26.2614	25.8941	26.7262	26.465	26.6203	26.3117	26.5559	25.983	26.6258	26.3604							3	3	3	13.9	13.9	13.9	30.789	1620500000	47	0.737508	0.0945469	-0.256619	-1.50505	0.509186	0.195618	-0.212414	-1.10971	0.383436	0.311473	0.149545	0.878263	D0C806	ABC transporter, permease protein
32.785	32.8014	32.7084	32.7465	32.7551	32.7131	32.6616	32.6853	32.886	32.7203	32.9864	33.0011	32.0966	32.3533	32.4702	32.3107	+	Colony A-3/WT	+	Colony B-3/WT	+	Colony C-3/WT	22	22	22	67	67	67	32.03	131480000000	602	2.86192	0.000803797	0.452621	5.6052	2.57365	0.00209467	0.396064	4.91544	2.95026	0.00146119	0.590752	5.82959	D0C807	Glutamate-aspartate periplasmic-binding protein
30.5496	30.5577	30.2657	30.3121	30.1279	29.9897	30.0328	29.9514	30.5378	30.1762	30.5774	30.44	30.3382	30.3764	30.571	30.3483			+	Colony B-3/WT			17	17	17	77.2	77.2	77.2	29.903	25870000000	289	0.0474982	0.821954	0.0128379	0.135828	2.91759	0.000833034	-0.383006	-5.74584	0.0834593	0.751769	0.0243721	0.230765	D0C808	Glutathione S-transferase, N-terminal domain protein
31.9328	32.0125	31.8514	31.8586	32.0301	31.9619	32.082	31.9494	31.9635	32.2125	31.9864	31.9269	32.276	32.4145	32.3427	32.3162	+	Colony A-3/WT	+	Colony B-3/WT	+	Colony C-3/WT	20	20	20	69.9	69.9	69.9	39.652	87240000000	479	3.94824	0	-0.423564	-8.89233	3.63033	0.000174863	-0.331538	-7.79906	2.36263	0.00358556	-0.315022	-4.44793	D0C816	Ribosome-binding ATPase YchF
28.8337	28.8722	28.8175	28.6099	28.9946	28.7778	28.9034	28.9844	28.9762	28.9364	29.1248	28.9021	28.6941	28.8416	28.8807	28.9625							7	7	7	44.2	44.2	44.2	17.678	9442600000	103	0.319204	0.317741	-0.0613713	-0.753778	0.41351	0.25385	0.0703616	0.934918	0.962051	0.0726653	0.14019	1.88016	D0C820	Uncharacterized protein
28.9098	28.9943	28.8695	28.805	29.0251	29.1231	29.1494	28.6967	29.2994	28.9455	29.2857	29.0864	29.2841	29.3468	29.2331	29.2902	+	Colony A-3/WT	+	Colony B-3/WT			6	6	6	61.2	61.2	61.2	15.281	11106000000	129	3.85956	0	-0.39386	-8.57483	1.45904	0.0204267	-0.289936	-2.71767	0.749347	0.120242	-0.134282	-1.52503	D0C823	Tautomerase enzyme
31.0619	30.9627	30.9691	30.9978	31.1041	30.9924	31.13	30.9165	31.3137	31.187	31.2416	31.3633	31.1201	31.2853	31.3341	31.2125	+	Colony A-3/WT	+	Colony B-3/WT			17	17	17	49.8	49.8	49.8	43.709	45962000000	263	2.44942	0.00190428	-0.240148	-4.63667	1.60276	0.0159051	-0.202284	-2.96993	0.259501	0.440403	0.038393	0.632852	D0C824	Formate-dependent phosphoribosylglycinamide formyltransferase
29.8844	29.8908	29.7796	29.9866	29.5778	29.6854	29.6205	29.5284	29.6149	29.716	29.599	29.5637	29.5504	29.5298	29.7127	29.6832	+	Colony A-3/WT					34	34	34	53	53	53	102.1	16288000000	362	2.27087	0.002771	0.266306	4.25347	0.103558	0.666204	-0.0160151	-0.281412	0.0264356	0.911187	0.00436783	0.0772382	D0C825	Bifunctional uridylyltransferase/uridylyl-removing enzyme
30.3644	30.2721	30.1182	30.2595	30.1409	30.3231	30.2863	30.2769	30.1546	30.4135	30.2481	30.5193	30.7944	30.9716	30.8065	30.8997	+	Colony A-3/WT	+	Colony B-3/WT	+	Colony C-3/WT	19	19	19	63	63	63	43.817	28323000000	350	4.06874	0	-0.614483	-9.34027	4.37742	0	-0.611231	-10.581	2.94545	0.00145455	-0.534146	-5.8172	D0C826	Succinyldiaminopimelate transaminase
31.3609	31.2287	31.0496	30.9618	30.9896	30.7923	30.8118	30.8978	31.0102	31.0637	31.1206	31.2978	31.0793	31.0826	30.931	30.8686							10	9	9	68.9	62.7	62.7	17.921	41893000000	200	0.752203	0.0910347	0.159821	1.52984	0.837322	0.085951	-0.117513	-1.67259	0.799219	0.106875	0.132662	1.60885	D0C829	Glutathione peroxidase
28.7057	29.017	28.5334	28.6211	28.603	28.9745	28.8982	28.3615	28.8899	28.7248	29.048	29.1105	29.2198	29.3489	29.3625	29.1007	+	Colony A-3/WT	+	Colony B-3/WT	+	Colony C-3/WT	4	4	4	46	46	46	15.908	9952300000	72	2.34879	0.00254371	-0.538702	-4.41827	1.9282	0.00753942	-0.548702	-3.56903	1.60192	0.018636	-0.314684	-2.96844	D0C830	Peptide methionine sulfoxide reductase MsrB
29.8068	29.876	29.9261	29.7913	30.0321	29.9359	29.9265	30.0642	30.1496	30.0718	29.8001	30.0774	30.1327	30.1057	30.3271	30.1487	+	Colony A-3/WT	+	Colony B-3/WT			18	18	18	49.6	49.6	49.6	53.351	20762000000	268	2.8373	0.000796238	-0.328514	-5.54378	1.67445	0.0136857	-0.188881	-3.09833	0.837869	0.0968411	-0.153836	-1.6735	D0C831	Putative aminotransferase AlaT
27.9268	27.8883	27.5653	27.5538	25.8042	26.3992	26.4163	26.0613	26.4975	26.463	26.6607	26.3635	25.4953	25.5015	25.2899	25.5874	+	Colony A-3/WT	+	Colony B-3/WT	+	Colony C-3/WT	4	4	4	13.1	13.1	13.1	47.259	2013500000	72	5.86772	0	2.26504	19.0423	2.33549	0.00378434	0.701721	4.38987	4.61442	0	1.02765	11.6334	D0C832	Putative proton/sodium-glutamate symport protein GltT
34.1784	34.1584	34.0337	34.0306	33.1035	33.2311	33.168	33.0797	33.5699	33.4975	33.4506	33.5346	32.7791	32.9174	32.9889	33.0166	+	Colony A-3/WT	+	Colony B-3/WT	+	Colony C-3/WT	20	20	20	75.8	75.8	75.8	37.857	224650000000	446	5.68626	0	1.17478	17.7421	1.88569	0.00846748	0.220074	3.48826	4.23006	0.000289157	0.587657	9.97131	D0C833	L-asparaginase, type II
29.4781	29.7383	29.5007	29.5759	29.5641	29.5875	29.539	29.4355	29.7089	29.7322	29.7129	29.7759	29.9833	30.0611	30.1164	30.1208	+	Colony A-3/WT	+	Colony B-3/WT	+	Colony C-3/WT	42	42	42	46.1	46.1	46.1	133.46	17429000000	458	3.51076	0.000347418	-0.497171	-7.41864	4.61196	0	-0.538905	-11.622	4.11318	0.000271186	-0.337939	-9.51045	D0C834	DNA polymerase III subunit alpha
27.963	28.095	28.2999	28.0412	27.891	27.866	28.1247	27.9713	28.3601	28.159	27.9113	28.3167	28.8805	28.8843	28.9113	28.5789	+	Colony A-3/WT	+	Colony B-3/WT	+	Colony C-3/WT	7	7	7	40.9	40.9	40.9	31.284	6453900000	103	3.26972	0.000476386	-0.713938	-6.69809	3.89249	0.00021843	-0.850496	-8.69154	2.56032	0.00259823	-0.626965	-4.88502	D0C835	tRNA (cytidine/uridine-2-O-)-methyltransferase TrmJ
28.7643	28.7071	28.8271	28.8734	28.8399	28.5991	28.7389	28.7233	28.8123	28.8839	28.8433	28.7118	29.3215	29.4798	29.5658	29.4622	+	Colony A-3/WT	+	Colony B-3/WT	+	Colony C-3/WT	12	12	12	49.8	49.8	49.8	29.877	10133000000	223	4.39699	0	-0.664367	-10.6645	4.32363	0	-0.732031	-10.3546	4.31228	0.000307692	-0.644497	-10.3074	D0C836	Serine O-acetyltransferase
33.7433	33.7591	33.6487	33.7482	33.6826	33.6475	33.5697	33.5648	33.7004	33.4931	33.5529	33.5594	33.5624	33.8331	33.6436	33.5784							25	25	25	75.1	75.1	75.1	35.038	256210000000	634	0.475558	0.19687	0.0704756	1.04911	0.223476	0.450337	-0.038209	-0.556874	0.461714	0.254775	-0.0778913	-1.02392	D0C837	Uncharacterized protein
28.6145	28.6884	28.5913	28.4143	28.638	28.6161	28.6753	28.5021	28.7344	28.8559	28.8385	28.8303	28.6702	28.646	28.6762	28.698					+	Colony C-3/WT	26	26	26	58.4	58.4	58.4	75.734	8080500000	285	0.803713	0.0800642	-0.0954638	-1.61638	0.833922	0.0863018	-0.0646944	-1.66691	2.54333	0.00266434	0.142176	4.84643	D0C838	AB hydrolase-1 domain-containing protein
25.0735	25.5628	25.5587	24.506	24.852	24.2973	24.9086	25.2198	23.5397	24.4385	24.5791	24.7243	25.3554	25.0721	24.0012	25.3346							6	6	6	64.1	64.1	64.1	16.414	566830000	42	0.232775	0.416058	0.234418	0.576731	0.121562	0.624442	-0.121392	-0.325501	0.728599	0.1267	-0.62042	-1.48999	D0C844	Arsenate reductase
29.0845	28.9544	28.8365	28.9605	29.2974	29.3291	29.2523	29.1621	29.0532	29.2925	29.3153	29.2869	29.3342	29.469	29.5772	29.4254	+	Colony A-3/WT	+	Colony B-3/WT	+	Colony C-3/WT	26	26	26	60	60	60	69.667	12250000000	342	3.33541	0.000491525	-0.492493	-6.88857	1.66232	0.0138067	-0.191206	-3.07646	1.44577	0.0256015	-0.214483	-2.69469	D0C846	Amidohydrolase family protein
25.0166	24.8667	24.8348	25.3776	24.9577	25.0928	25.1996	24.8284	24.7144	24.8469	24.9113	22.2905	25.3202	25.5306	25.1091	25.166			+	Colony B-3/WT			5	5	5	47.4	47.4	47.4	25.571	666610000	40	0.824102	0.075988	-0.257587	-1.6505	1.10075	0.0446953	-0.261886	-2.11069	0.853534	0.0929805	-1.09067	-1.69964	D0C847	Isochorismatase family protein
25.5945	25.2359	25.9239	25.8085	25.8999	25.5795	25.2069	25.8008	25.5275	25.5022	25.6619	25.2875	26.184	25.7028	25.6118	25.6952							6	6	6	34.1	34.1	34.1	34.79	1032000000	51	0.338	0.300603	-0.157749	-0.790746	0.382973	0.276612	-0.176675	-0.877383	1.03715	0.061142	-0.303665	-2.00489	D0C848	LysR substrate binding domain protein
27.42	27.5237	27.2933	26.8865	26.5064	27.1007	27.0022	26.6518	26.9676	26.5395	26.5271	26.6716	27.2087	27.0766	27.2367	27.4016			+	Colony B-3/WT	+	Colony C-3/WT	8	8	8	44.6	44.6	44.6	28.183	2739000000	91	0.120412	0.613416	0.0499525	0.322717	1.42838	0.021314	-0.415645	-2.66465	2.40329	0.00332686	-0.554456	-4.53573	D0C849	FCD domain protein
24.524	24.3492	23.9589	22.9405	23.888	24.4564	24.3443	24.2968	22.4713	22.408	23.0774	24.5941	24.8214	25.6894	25.5928	25.8491	+	Colony A-3/WT	+	Colony B-3/WT	+	Colony C-3/WT	8	8	8	33.8	33.8	33.8	33.643	412670000	24	1.97744	0.00567984	-1.54501	-3.66369	2.51251	0.00260649	-1.24181	-4.77694	2.25353	0.00445665	-2.35049	-4.21731	D0C852	Taurine dioxygenase
26.2264	23.425	23.7927	24.0994	26.0835	23.6446	25.9698	26.1584	25.9113	24.8164	25.3636	24.1782	26.5662	26.1067	26.2584	26.2745	+	Colony A-3/WT			+	Colony C-3/WT	8	8	8	39.3	39.3	39.3	37.85	1295600000	31	1.6261	0.0119831	-1.9156	-3.01153	0.652877	0.134446	-0.837403	-1.36106	1.74069	0.0139436	-1.23409	-3.21864	D0C855	Taurine ABC transporter, periplasmic binding protein
26.732	26.394	26.5783	26.5069	26.7388	26.9292	26.9025	26.6811	26.0803	26.0368	26.2193	26.9043	25.8148	26.1796	26.7321	26.1927			+	Colony B-3/WT			8	8	8	35.8	35.8	35.8	44.409	1840900000	80	0.794439	0.0819894	0.322975	1.60084	1.58453	0.0164759	0.583095	2.93757	0.107329	0.696992	0.0803771	0.290744	D0C856	Uncharacterized protein
27.5051	27.7592	27.4529	27.66	27.6792	27.7708	27.7624	27.6753	27.7083	27.9506	27.9248	27.843	24.6709	24.9413	24.9072	23.6061	+	Colony A-3/WT	+	Colony B-3/WT	+	Colony C-3/WT	12	12	12	33	33	33	50.616	3137200000	99	4.11348	0	3.06294	9.5116	4.26659	0	3.19058	10.1194	4.34087	0	3.32534	10.4268	D0C858	FMN-dependent oxidoreductase, nitrilotriacetate monooxygenase family
25.8305	25.8775	25.7707	26.1396	26.2011	26.5411	26.4518	26.0629	26.7304	26.2388	26.3414	26.3597	25.9518	26.4877	25.9085	26.0131							4	4	4	13.5	13.5	13.5	53.619	1504600000	33	0.550674	0.158468	-0.185718	-1.18342	0.61067	0.149265	0.223917	1.28829	0.975552	0.0700597	0.327295	1.90258	D0C862	Bacterial cytochrome ubiquinol oxidase
26.5164	26.9119	26.4054	24.5112	24.2391	26.6326	26.2303	23.6666	26.3352	27.0851	25.7416	24.1128	26.3365	25.2243	26.9661	27.0224							4	4	4	10.1	10.1	10.1	55.934	1376500000	19	0.171813	0.508475	-0.301107	-0.443036	0.68831	0.12306	-1.19517	-1.42162	0.317815	0.373653	-0.568673	-0.751027	D0C865	Transcriptional regulator, GntR family
24.9817	25.5906	25.247	25.3841	25.4011	25.3495	25.0767	25.3467	24.9594	24.8973	25.0026	24.8912	25.3862	25.6654	25.4886	25.1675					+	Colony C-3/WT	8	8	8	30.6	30.6	30.6	34.549	758820000	48	0.325503	0.311302	-0.126149	-0.766219	0.475648	0.213774	-0.133473	-1.04928	2.41482	0.00318822	-0.489315	-4.56084	D0C876	Glycine cleavage system transcriptional activator
27.3886	27.2278	27.0625	26.9872	27.2758	27.0666	27.0002	27.0852	26.5975	26.8651	27.0999	27.1406	27.1028	27.0546	26.746	26.6608	+	Colony A-3/WT					10	10	10	59.9	59.9	59.9	22.611	2545700000	94	0.998754	0.049227	0.275465	1.94111	0.869819	0.0795108	0.215903	1.72679	0.0747701	0.775104	0.0347376	0.20836	D0C879	Acetyltransferase, GNAT family
29.2372	29.4098	29.4211	29.3912	30.0478	30.1236	29.691	30.002	29.7331	30.01	29.7812	30.0127	28.9821	29.2076	29.231	29.3676			+	Colony B-3/WT	+	Colony C-3/WT	12	12	12	70.7	70.7	70.7	23.934	15885000000	177	0.943836	0.0559699	0.167769	1.8499	3.08838	0.000612967	0.769017	6.19375	3.13119	0.000866841	0.687156	6.31004	D0C885	Glutathione S-transferase, N-terminal domain protein
29.775	29.8773	29.7277	29.8071	30.5806	30.6166	30.3876	30.4596	30.5478	30.5344	30.4614	30.527	29.8807	30.0729	30.2285	30.2919	+	Colony A-3/WT	+	Colony B-3/WT	+	Colony C-3/WT	17	17	17	72.4	72.4	72.4	32.313	25348000000	346	1.79626	0.00817674	-0.32173	-3.32093	1.99952	0.00658442	0.392614	3.70649	2.27508	0.00443988	0.399147	4.26229	D0C886	Glutathione S-transferase, C-terminal domain protein
27.1549	27.029	26.9043	26.9079	26.9963	27.0922	27.1057	27.034	26.7829	27.1777	26.8674	27.2058	27.0588	27.2706	27.1088	27.2633	+	Colony A-3/WT					11	11	11	35.9	35.9	35.9	34.811	2727300000	99	1.1527	0.0348743	-0.176358	-2.19738	1.02484	0.0542429	-0.118317	-1.98444	0.669417	0.146987	-0.16691	-1.38938	D0C887	LysR substrate binding domain protein
27.8561	27.9255	27.9741	28.1188	27.68	27.7368	28.1501	27.9583	27.9942	27.8113	28.0512	28.0466	27.5258	27.4324	27.0739	26.254	+	Colony A-3/WT	+	Colony B-3/WT	+	Colony C-3/WT	8	8	8	51.4	51.4	51.4	25.591	4413200000	93	1.64444	0.0116472	0.897117	3.04435	1.40367	0.0228267	0.809768	2.62208	1.65718	0.0167793	0.904288	3.06723	D0C888	Oxidoreductase, short chain dehydrogenase/reductase family protein
24.9073	24.9647	24.9609	24.847	25.2106	25.2368	25.4826	25.3015	25.3952	24.7928	25.3207	25.2306	22.7629	23.9609	25.8688	23.2522							5	5	5	29.4	29.4	29.4	34.645	518120000	34	0.678649	0.111007	0.958776	1.40515	1.01454	0.0562746	1.34667	1.96732	0.890132	0.0849571	1.22362	1.76061	D0C891	Uncharacterized protein
27.5277	27.435	27.4647	27.4708	27.9096	27.6914	27.8639	27.8019	27.8971	27.3367	27.8787	27.8654	28.2888	28.2949	28.4847	28.5634	+	Colony A-3/WT	+	Colony B-3/WT	+	Colony C-3/WT	13	13	13	57.3	57.3	57.3	31.751	4935100000	197	4.90097	0	-0.933399	-13.0352	3.39823	0.000255319	-0.591247	-7.0748	2.31647	0.00394512	-0.663471	-4.34947	D0C895	ABC transporter, substrate-binding protein, family 3
26.582	26.1919	26.2322	26.5055	26.6632	26.6113	26.8473	26.7265	26.7326	26.5793	26.2915	26.6324	27.5366	27.3153	27.5937	27.7046	+	Colony A-3/WT	+	Colony B-3/WT	+	Colony C-3/WT	10	10	10	47.2	47.2	47.2	31.352	2465600000	131	4.00853	0	-1.15964	-9.114	3.85611	0.000210526	-0.825475	-8.56268	3.63639	0.0004	-0.978597	-7.81878	D0C896	ABC transporter, substrate-binding protein, family 3
29.6251	30.0238	30.0237	30.0654	29.6597	29.9048	30.1272	29.8992	30.3416	29.7561	30.1649	29.9107	29.8555	30.5912	29.9275	30.1589							6	6	6	37.2	37.2	37.2	10.421	20903000000	136	0.457885	0.20738	-0.198806	-1.01692	0.577864	0.161755	-0.235538	-1.23118	0.164577	0.582432	-0.0899611	-0.426562	D0C8A0	Acetyltransferase, GNAT family
24.9491	24.6145	24.5523	23.4768	25.0209	24.6993	24.5123	25.1003	25.2891	25.2796	25.4881	25.3249	24.9587	25.2039	24.9146	25.1247	+	Colony A-3/WT			+	Colony C-3/WT	5	5	5	37.1	37.1	37.1	16.971	671650000	48	1.03311	0.0455781	-0.652332	-1.99818	0.683728	0.12443	-0.217301	-1.41381	1.90256	0.00950476	0.29493	3.52021	D0C8A4	Transcriptional regulator, AsnC family
27.2066	27.2052	27.2717	27.1231	27.1441	27.2696	27.2174	27.2445	27.2445	26.894	27.0904	26.9623	27.4155	27.0478	27.4432	27.4247					+	Colony C-3/WT	6	6	6	43.8	43.8	43.8	23.203	3001600000	79	0.624906	0.128931	-0.131197	-1.31292	0.532357	0.182031	-0.11391	-1.15101	1.22951	0.0394038	-0.285018	-2.32614	D0C8A6	Peptidase S24-like protein
24.814	25.0212	24.5802	25.4511	26.9147	26.9348	26.3871	25.9187	28.2348	30.1501	27.5991	27.4485	24.3621	24.6689	23.9399	24.2234	+	Colony A-3/WT	+	Colony B-3/WT	+	Colony C-3/WT	3	3	3	30	30	30	16.455	2898100000	30	1.50319	0.0159166	0.668065	2.79449	3.64119	0.000175824	2.24025	7.83441	3.14547	0.000744681	4.05954	6.34922	D0C8A9	Uncharacterized protein (Fragment)
27.7068	27.956	28.4136	28.1828	29.1711	29.1806	29.0888	28.7682	29.5166	29.4091	29.2186	29.08	25.099	24.6132	25.1709	24.5927	+	Colony A-3/WT	+	Colony B-3/WT	+	Colony C-3/WT	7	7	7	51.1	51.1	51.1	16.095	7222800000	70	5.21882	0	3.19584	14.7752	6.3493	0	4.18324	22.9588	6.49792	0	4.43713	24.3194	D0C8B0	Uncharacterized protein
30.6201	30.6496	30.9389	30.8391	31.5831	31.5808	31.4607	31.3448	32.2327	32.2035	31.4574	31.6387	28.2249	28.4047	28.4631	28.2802	+	Colony A-3/WT	+	Colony B-3/WT	+	Colony C-3/WT	18	18	18	90.1	90.1	90.1	31.942	43515000000	350	6.64211	0	2.4187	25.7149	7.77707	0	3.14915	39.8424	5.62283	0	3.53985	17.3083	D0C8B1	Oxidoreductase, short chain dehydrogenase/reductase family protein
35.6431	35.441	35.7346	35.7597	36.0479	36.1552	36.0572	35.7849	36.2743	35.9805	35.8617	36.0176	32.5234	32.8573	32.6963	32.8975	+	Colony A-3/WT	+	Colony B-3/WT	+	Colony C-3/WT	46	46	45	72.8	72.8	72.8	80.072	958800000000	1570	6.66412	0	2.901	25.9348	6.86785	0	3.26768	28.0597	6.77046	0	3.28993	27.0233	D0C8B2	Catalase
29.5374	29.6366	30.1557	30.1999	30.6362	30.5612	30.4542	30.7204	31.253	30.8638	30.8284	30.7194	26.7451	25.8272	25.7747	24.5858	+	Colony A-3/WT	+	Colony B-3/WT	+	Colony C-3/WT	21	21	21	51	51	51	55.058	22152000000	236	3.90542	0	4.14918	8.73775	4.44943	0	4.8598	10.8912	4.54697	0	5.18291	11.3245	D0C8B3	Uncharacterized protein
23.06	24.6933	24.7866	25.1402	23.9613	25.2321	24.9166	24.9232	24.7207	25.5045	24.5091	25.2575	23.9652	23.5202	24.3686	25.1896							2	2	2	21.4	21.4	21.4	18.394	374400000	12	0.100049	0.664148	0.159148	0.272684	0.507781	0.196434	0.497433	1.10719	0.878564	0.0874603	0.737076	1.74135	D0C8B4	Competence/damage-inducible domain protein CinA
29.9309	30.2846	30.5147	30.2861	30.5645	30.6926	31.1088	30.303	31.7428	30.9086	31.2206	31.2815	27.8023	27.442	27.7497	27.8154	+	Colony A-3/WT	+	Colony B-3/WT	+	Colony C-3/WT	8	8	8	91.4	91.4	91.4	12.449	28046000000	188	5.59224	0	2.55173	17.1027	5.36259	0	2.96489	15.6329	5.80128	0	3.58603	18.5558	D0C8B6	Uncharacterized protein
27.8307	27.613	27.4983	27.5982	27.6084	27.5045	27.5846	27.4682	27.8	27.7389	28.0921	27.9699	27.6151	27.7326	27.9071	27.8897			+	Colony B-3/WT			9	9	9	26.9	26.9	26.9	48.193	4249200000	124	0.754882	0.0903476	-0.151047	-1.53436	1.72553	0.0121301	-0.244671	-3.19095	0.489835	0.235435	0.114118	1.07494	D0C8C3	Uncharacterized protein
27.4959	27.4669	27.2852	27.3235	27.4248	27.8693	27.7108	27.6537	27.6568	27.4293	27.4236	27.2852	27.4647	27.2374	27.511	27.3477			+	Colony B-3/WT			8	8	8	44.8	44.8	44.8	25.293	3645100000	133	0.0110901	0.953411	0.00265217	0.0329446	1.32042	0.0279877	0.27442	2.47983	0.240916	0.464236	0.0584869	0.593971	D0C8C4	Methyltransferase domain protein
30.6735	30.6555	30.7798	30.7368	30.8421	30.8226	30.9821	30.872	30.8697	30.7155	30.9188	30.8882	30.5503	30.5408	30.6884	30.6076	+	Colony A-3/WT	+	Colony B-3/WT	+	Colony C-3/WT	25	25	25	71.1	71.1	71.1	63.454	34496000000	451	1.37888	0.0219667	0.114605	2.57956	2.92048	0.000836036	0.282907	5.75323	2.35801	0.00357994	0.251247	4.43801	D0C8C5	AMP-binding enzyme
27.6073	27.7681	27.341	27.3894	28.0337	28.0271	27.8927	27.5067	28.1252	27.8402	27.7027	28.1893	27.8881	28.3854	27.599	27.9826	+	Colony A-3/WT					8	8	8	39	39	39	22.909	4673600000	67	1.2122	0.0311535	-0.437333	-2.29704	0.189814	0.499987	-0.0987549	-0.483423	0.000945333	0.996	0.000566483	0.00284055	D0C8C6	Transcriptional regulator, TetR family
32.5227	32.4597	32.5155	32.5351	32.7898	32.6596	32.8522	32.8307	32.9836	32.8179	32.8184	32.8934	32.5669	32.5256	32.7733	32.5689			+	Colony B-3/WT	+	Colony C-3/WT	22	22	22	72.8	72.8	72.8	42.331	133280000000	506	0.868814	0.0675677	-0.100446	-1.72511	1.31606	0.0281591	0.174378	2.47242	2.12315	0.00614016	0.269642	3.95078	D0C8C7	Isovaleryl-CoA dehydrogenase, mitochondrial
32.0782	32.0152	32.2552	32.2648	32.4517	32.3858	32.5441	32.5389	32.576	32.5293	32.5957	32.5353	32.2134	32.1827	32.2304	32.4072			+	Colony B-3/WT	+	Colony C-3/WT	27	27	27	65.5	65.5	65.5	58.046	106170000000	585	0.618562	0.131188	-0.105091	-1.30195	1.89619	0.00818443	0.221678	3.50813	2.88725	0.00175824	0.300623	5.66886	D0C8C8	Carboxyl transferase domain protein
30.9507	30.7555	30.9119	30.8772	31.6129	31.4707	31.4778	31.3662	31.5279	31.4691	31.3611	31.3564	31.1567	31.174	31.1607	31.2481	+	Colony A-3/WT	+	Colony B-3/WT	+	Colony C-3/WT	14	14	14	59.9	59.9	59.9	29.236	49476000000	269	3.22603	0.000463074	-0.311047	-6.57374	2.78266	0.00132013	0.297012	5.40923	2.67968	0.00254685	0.243778	5.1619	D0C8C9	Enoyl-CoA hydratase/isomerase family protein
32.8887	32.79	32.9216	32.9473	33.179	33.2405	33.3165	33.1078	33.3388	33.432	33.3307	33.3386	32.9991	33.0337	33.1466	33.0393	+	Colony A-3/WT	+	Colony B-3/WT	+	Colony C-3/WT	35	35	35	68.3	68.3	68.3	73.9	181000000000	738	1.93006	0.00648023	-0.167774	-3.57259	1.53944	0.017598	0.156274	2.85799	3.58136	0.000386617	0.305373	7.64134	D0C8D0	Putative acetyl-CoA carboxylase, biotin carboxylase subunit
31.0659	30.9784	31.0197	30.9048	31.3182	31.2708	31.4507	31.2468	31.2552	31.2162	31.2028	31.3031	31.1725	31.1211	31.2399	31.1712	+	Colony A-3/WT	+	Colony B-3/WT			20	20	20	83.7	83.7	83.7	32.867	46733000000	405	2.33175	0.00257957	-0.18399	-4.38192	1.51625	0.018592	0.145458	2.81731	1.06634	0.0583489	0.0681438	2.05342	D0C8D1	Hydroxymethylglutaryl-CoA lyase
27.2173	27.0475	27.0601	26.9518	27.0522	27.1494	27.1193	26.7679	27.2194	27.024	27.1774	27.2704	27.0387	27.1369	26.9742	27.1664							10	10	10	42.2	42.2	42.2	35.02	2779500000	96	0.0489679	0.817304	-0.0098772	-0.139828	0.235103	0.432782	-0.0568905	-0.581674	0.649052	0.154474	0.0937314	1.35449	D0C8D2	LysR substrate binding domain protein
33.2273	33.2005	33.2305	33.2471	33.6815	33.7484	33.6875	33.6295	33.7597	33.9143	33.7303	33.638	33.198	33.3576	33.2976	33.2007			+	Colony B-3/WT	+	Colony C-3/WT	75	75	75	73.7	73.7	73.7	128.01	231040000000	1427	0.407603	0.239118	-0.0371103	-0.923863	4.03424	0.000242424	0.423247	9.21003	3.42689	0.000472131	0.497096	7.1611	D0C8D3	2-oxoacid:ferredoxin/flavodoxin oxidoreductase, gamma subunit
28.8226	28.7623	28.9383	28.9795	28.7311	28.9899	28.7269	28.787	28.8254	28.7608	28.8192	28.7003	29.1364	28.697	29.122	28.8157							10	10	10	53.6	53.6	53.6	29.94	9389900000	145	0.221734	0.433104	-0.0670896	-0.553135	0.481023	0.210975	-0.134021	-1.05902	0.709068	0.133598	-0.166339	-1.4569	D0C8D4	Uncharacterized protein
28.9089	28.6014	28.8865	29.4201	29.0795	29.1809	28.5369	28.8488	28.739	28.7729	28.8796	29.5007	29.4555	28.8994	29.0714	29.3129							14	12	12	33.8	30.8	30.8	66.647	10850000000	63	0.500952	0.182425	-0.230588	-1.09495	0.702069	0.11855	-0.273254	-1.44502	0.435065	0.272832	-0.211742	-0.974971	D0C8D5	Acyl-CoA dehydrogenase, C-terminal domain protein
25.6641	25.9857	25.7481	25.7352	25.6029	25.4833	25.6831	25.5711	25.7797	25.3178	25.6432	25.801	25.9884	25.7729	25.9524	25.7366			+	Colony B-3/WT			3	3	3	38.3	38.3	38.3	16.132	1110700000	51	0.3641	0.277106	-0.0792689	-0.841319	1.98478	0.00671106	-0.277451	-3.67789	0.897612	0.0830335	-0.227157	-1.77306	D0C8D6	4HBT domain-containing protein
25.2347	24.8519	24.4423	24.709	25.2349	25.3946	25.0574	24.6735	25.1188	25.5992	25.2012	25.4684	25.494	25.5643	25.5236	25.3339	+	Colony A-3/WT	+	Colony B-3/WT			6	6	6	26.3	26.3	26.3	42.047	758800000	63	2.08573	0.00444029	-0.669481	-3.87601	1.26468	0.0311525	-0.388842	-2.38541	0.487867	0.23658	-0.132024	-1.07139	D0C8E2	Acyl-CoA dehydrogenase
25.6679	25.5702	25.4363	25.8677	25.6359	25.2408	25.9194	25.8037	25.7291	25.9305	25.8427	25.6647	25.7646	25.7718	25.8911	25.9175	+	Colony A-3/WT					11	11	11	29.6	29.6	29.6	56.149	1074800000	91	1.04975	0.0440474	-0.200737	-2.02584	0.567786	0.166172	-0.186296	-1.21352	0.255501	0.44464	-0.0444674	-0.624538	D0C8E5	3-hydroxy-acyl-CoA dehydrogenase
26.5997	26.4215	26.7756	26.8204	26.6637	26.6564	26.7585	26.6547	26.9853	26.926	26.7468	26.9969	26.9676	27.0886	26.9961	27.0669	+	Colony A-3/WT	+	Colony B-3/WT			11	11	11	45.1	45.1	45.1	41.896	2211300000	116	2.1152	0.00387673	-0.375509	-3.93483	4.00359	0.000233577	-0.346509	-9.09566	0.913681	0.0805193	-0.11607	-1.79979	D0C8E6	Putative beta-ketoadipyl CoA thiolase
27.4096	27.1945	27.4743	27.1612	27.7296	27.674	27.4106	27.447	27.2947	27.406	27.4492	27.6438	27.8141	27.7414	27.8488	27.584	+	Colony A-3/WT			+	Colony C-3/WT	12	12	12	57.1	57.1	57.1	31.565	3784500000	109	2.38121	0.00239708	-0.437184	-4.48792	0.932681	0.0680104	-0.181772	-1.83137	1.72558	0.0145739	-0.298637	-3.19104	D0C8E7	IclR helix-turn-helix domain protein
25.0826	23.7894	23.9804	25.2303	25.8333	25.8339	25.9986	26.3802	25.983	25.9505	25.7341	25.999	25.5705	25.7706	26.1998	25.6122	+	Colony A-3/WT					5	5	5	21.3	21.3	21.3	35.051	1063700000	29	1.72532	0.00928647	-1.2676	-3.19058	0.535187	0.180504	0.223223	1.15603	0.353306	0.339116	0.128367	0.820508	D0C8E9	Oxidoreductase, 2-nitropropane dioxygenase family protein
28.1575	28.1008	27.8845	28.1601	28.4982	28.5854	28.3672	28.5981	28.2528	28.1869	28.2667	28.2925	28.4758	28.1468	28.3749	28.1401	+	Colony A-3/WT	+	Colony B-3/WT			9	9	9	45.6	45.6	45.6	31.986	6278000000	132	1.01207	0.0478681	-0.208674	-1.96323	1.20927	0.0348977	0.227834	2.29213	0.152665	0.604531	-0.0346942	-0.39913	D0C8F1	IclR helix-turn-helix domain protein
24.5803	24.8673	24.2657	24.5953	24.9182	24.4406	24.9279	24.6366	25.2735	25.247	25.2881	24.9725	25.3548	25.4482	25.4557	25.8314	+	Colony A-3/WT	+	Colony B-3/WT	+	Colony C-3/WT	9	9	9	30.1	30.1	30.1	44.234	685250000	40	2.95226	0.000648829	-0.945377	-5.83474	2.61143	0.00198795	-0.791717	-5.00235	1.35066	0.030794	-0.327239	-2.53132	D0C8F2	CoA-transferase family III protein
25.3947	25.2759	22.0271	23.2545	23.9309	22.63	25.5089	23.6548	24.4147	24.8428	24.9276	24.9324	24.3693	23.9343	25.0373	24.8651							6	6	6	31.9	31.9	31.9	41.635	606410000	13	0.27222	0.369087	-0.563437	-0.6591	0.427138	0.244746	-0.62032	-0.960293	0.352065	0.340323	0.227867	0.818105	D0C8F3	Acyl-CoA dehydrogenase, C-terminal domain protein
24.9253	25.2108	25.3988	24.9377	26.0129	25.7124	25.9387	25.7287	25.191	24.8566	25.262	25.3898	24.9345	25.4404	24.8435	23.4997			+	Colony B-3/WT			6	6	6	28.8	28.8	28.8	29.766	772030000	60	0.459454	0.206626	0.438613	1.01979	1.49102	0.0194706	1.16861	2.77326	0.532958	0.210676	0.495318	1.15207	D0C8F5	Phosphonoacetaldehyde hydrolase
25.8004	25.7443	25.435	25.9872	27.086	26.8554	26.824	26.7204	26.3892	26.81	26.5721	26.5718	26.4367	26.2824	26.0336	25.8823	+	Colony A-3/WT	+	Colony B-3/WT	+	Colony C-3/WT	10	10	10	28.3	28.3	28.3	44.346	1728300000	45	1.31401	0.0248348	-0.417021	-2.46893	2.55795	0.00217277	0.712686	4.87962	1.52133	0.0222265	0.427029	2.82621	D0C8F6	2-aminoethylphosphonate--pyruvate transaminase
25.4465	25.7142	25.6529	25.9365	25.7791	25.3189	25.5964	25.613	26.0318	25.7856	25.6412	25.7973	26.4523	26.0659	26.5331	25.8221	+	Colony A-3/WT	+	Colony B-3/WT	+	Colony C-3/WT	5	5	5	26.2	26.2	26.2	27.739	1182200000	60	1.46202	0.0176751	-0.530803	-2.72284	1.80556	0.0103002	-0.641522	-3.33817	1.14299	0.0490305	-0.40436	-2.18116	D0C8G1	UbiC transcription regulator-associated domain protein
25.1216	25.099	25.339	25.1333	25.5647	25.4538	24.7203	24.7968	25.3782	24.8184	24.8315	25.5635	25.2597	25.5028	25.3389	25.2057							8	8	8	49	49	49	22.558	746850000	32	0.912377	0.0610272	-0.153539	-1.79762	0.366763	0.290193	-0.19285	-0.846433	0.389534	0.306307	-0.178855	-0.889828	D0C8G4	FMN-dependent NADH-azoreductase
25.0904	25.5851	25.5261	25.1299	23.629	22.7708	24.2332	24.9012	25.2648	25.0378	24.3169	25.2264	25.4362	23.6271	25.2663	24.5233							2	2	2	19.7	19.7	19.7	14.409	568950000	22	0.694732	0.105929	0.61966	1.43255	0.648809	0.135771	-0.829673	-1.35407	0.211267	0.502038	0.248271	0.530528	D0C8G6	Putative 4-carboxymuconolactone decarboxylase
23.1886	23.7105	23.9871	23.5924	24.4766	23.3548	24.5804	23.9551	24.2022	24.7093	24.577	23.2228	24.0161	24.0682	24.7232	23.9951	+	Colony A-3/WT					6	6	6	20.9	20.9	20.9	39.34	294060000	18	1.27985	0.0267543	-0.580978	-2.41105	0.122951	0.621509	-0.108886	-0.328856	0.0204952	0.931525	-0.0228238	-0.0602617	D0C8H2	Luciferase-like monooxygenase
23.9974	23.9977	23.5712	23.0372	23.8888	24.3037	23.9098	24.3608	23.1513	24.7347	24.5112	24.2779	24.8822	24.5497	25.0026	25.0896	+	Colony A-3/WT	+	Colony B-3/WT			5	5	5	29	29	29	21.544	401710000	22	2.51839	0.00176781	-1.23015	-4.79013	2.35643	0.00375521	-0.765248	-4.43461	0.985579	0.0684238	-0.712266	-1.91923	D0C8H5	Uncharacterized protein
26.9461	27.0613	27.4261	26.426	27.1996	27.268	27.1239	27.1792	27.0054	27.0616	26.9923	27.045	27.3222	27.1693	27.0555	26.775							10	10	10	49.1	49.1	49.1	24.84	2729500000	104	0.192	0.474206	-0.115624	-0.488272	0.416245	0.252099	0.112167	0.940024	0.182259	0.549438	-0.0544453	-0.466571	D0C8H6	Transcriptional regulator, GntR family
25.2585	25.3506	25.4191	24.8369	23.7211	24.9573	25.4653	25.0992	25.1352	24.9839	23.5168	24.5389	25.3851	25.1284	25.2801	25.3995							4	4	4	54.3	54.3	54.3	10.811	625380000	26	0.227666	0.423978	-0.0819793	-0.565843	0.600367	0.153378	-0.487556	-1.27041	1.05693	0.0591098	-0.754542	-2.03778	D0C8H7	DUF1330 domain-containing protein
26.9281	26.9697	26.7732	26.9224	27.7724	27.8298	27.9035	27.6464	27.5881	27.5906	27.4626	27.3745	27.1981	27.248	27.3629	27.291	+	Colony A-3/WT	+	Colony B-3/WT	+	Colony C-3/WT	10	10	10	37.9	37.9	37.9	38.96	3392400000	103	3.30391	0.000487395	-0.37663	-6.79669	3.67629	0.000180282	0.513048	7.94959	1.9617	0.00870502	0.228974	3.63331	D0C8H9	Catalase-related peroxidase
23.5942	24.1517	26.1271	24.1407	24.5039	24.2484	24.3312	24.2318	24.2975	23.7184	24.2672	23.9012	24.5592	24.3335	24.5521	24.4442					+	Colony C-3/WT	8	8	8	36.7	36.7	36.7	35.081	336190000	41	0.0189361	0.921505	0.0311861	0.0557713	0.884489	0.0767471	-0.14344	-1.75122	1.51647	0.0223525	-0.426166	-2.8177	D0C8I3	LysR substrate binding domain protein
30.7138	30.793	30.873	30.9551	30.8245	30.9544	30.8514	30.6554	31.1716	30.8845	30.8338	30.9778	30.0863	30.1102	30.0312	30.1176	+	Colony A-3/WT	+	Colony B-3/WT	+	Colony C-3/WT	11	11	11	64.1	64.1	64.1	24.97	33124000000	190	4.98583	0	0.747435	13.4797	4.54284	0	0.735103	11.3059	4.57174	0	0.880617	11.4371	D0C8I4	AB hydrolase-1 domain-containing protein
30.2714	30.1969	30.2033	30.1859	30.1522	30.2209	30.3094	30.2668	29.6998	29.7726	29.8105	29.8407	29.7673	30.0058	30.0836	29.9807	+	Colony A-3/WT	+	Colony B-3/WT	+	Colony C-3/WT	23	23	23	52.3	52.3	52.3	69.618	21690000000	279	1.95659	0.00596683	0.255013	3.62347	1.98498	0.00671828	0.277974	3.67827	1.27661	0.035963	-0.178474	-2.40556	D0C8I8	AAA domain-containing protein
28.6546	28.7516	28.6771	28.6024	28.9219	28.7568	28.7956	28.7294	29.048	28.9562	28.9486	28.8808	27.2979	27.2964	27.5051	27.1826	+	Colony A-3/WT	+	Colony B-3/WT	+	Colony C-3/WT	8	8	8	45.8	45.8	45.8	28.767	7412400000	135	5.76039	0	1.35093	18.2625	5.80937	0	1.48041	18.6144	6.20485	0	1.63789	21.7081	D0C8J1	SUFU domain-containing protein
29.8862	29.8639	29.6571	29.4824	29.8734	29.6913	30.2372	29.8853	29.9544	29.555	30.3532	30.0562	29.6061	29.4869	29.6251	29.5947			+	Colony B-3/WT	+	Colony C-3/WT	16	16	16	72.3	72.3	72.3	27.15	18069000000	292	0.698893	0.104558	0.144157	1.43962	1.56601	0.0169974	0.34356	2.90481	1.26865	0.0364523	0.401457	2.39212	D0C8J2	Uncharacterized protein
26.9083	26.8939	26.707	26.7354	25.239	24.369	21.7889	23.2577	26.4338	26.3711	26.3465	26.3583	25.9188	25.7633	23.2917	25.9183	+	Colony A-3/WT					3	3	3	29.9	29.9	29.9	13.776	1316400000	28	1.30576	0.0251785	1.58814	2.45493	0.78366	0.0965104	-1.55937	-1.58275	0.907517	0.0810406	1.15442	1.78954	D0C8J3	Putative phenylacetic acid degradation protein PaaD
28.2959	28.2063	27.9945	28.0834	27.1478	27.3709	27.3233	26.8457	28.4767	28.3501	28.1839	27.9523	28.0914	28.087	27.7343	27.9721			+	Colony B-3/WT			8	8	8	47.3	47.3	47.3	21.875	4878500000	82	0.810022	0.07879	0.173809	1.62694	2.81926	0.00122813	-0.799312	-5.49911	0.982126	0.0691514	0.269501	1.9135	D0C8J4	Bacterial transferase hexapeptide repeat protein
27.7038	27.6089	27.1051	27.2405	27.1398	26.9121	26.7706	26.7526	27.3239	27.3483	27.3794	27.5046	27.3626	27.5673	27.5625	27.6882			+	Colony B-3/WT			10	10	10	41.1	41.1	41.1	37.107	3249800000	112	0.354562	0.2853	-0.130579	-0.822936	2.94522	0.000693431	-0.651389	-5.8166	1.02751	0.0626081	-0.156108	-1.98887	D0C8J5	Phenylacetic acid degradation operon negative regulatory protein PaaX
31.3645	31.4958	30.9564	31.1685	29.7915	29.8915	29.8594	30.0069	31.2024	31.5598	31.119	31.2304	30.9525	30.8824	30.9121	30.9765	+	Colony A-3/WT	+	Colony B-3/WT	+	Colony C-3/WT	17	17	17	51.6	51.6	51.6	48.776	38964000000	339	1.41265	0.0201139	0.315411	2.63753	6.12364	0	-1.04356	-21.0344	1.89243	0.0097346	0.347054	3.50101	D0C8J6	Phenylacetate-coenzyme A ligase
31.6391	31.455	31.2914	31.4239	30.6813	30.5583	30.7261	30.3633	31.8633	31.8149	31.5134	31.7161	31.3289	31.6321	31.548	31.4545			+	Colony B-3/WT	+	Colony C-3/WT	26	26	26	69.9	69.9	69.9	43.134	53645000000	433	0.152307	0.542198	-0.0385365	-0.398301	3.90541	0.00022069	-0.90866	-8.73771	1.23389	0.039175	0.236073	2.33352	D0C8J7	Beta-ketoadipyl CoA thiolase
31.5424	31.3952	31.2201	31.3211	30.343	30.1678	30.3654	30.3271	31.9076	31.8898	31.6078	31.6337	31.2695	31.3475	31.3431	31.3196			+	Colony B-3/WT	+	Colony C-3/WT	31	31	31	50.2	50.2	50.2	57.044	51652000000	573	0.297213	0.341554	0.0497956	0.70989	6.12396	0	-1.01913	-21.0371	2.75164	0.00227879	0.439789	5.33388	D0C8J8	3-hydroxy-acyl-CoA dehydrogenase
32.4156	32.4675	31.9963	32.1927	31.2938	31.4174	31.445	31.3008	32.6009	32.6916	32.4209	32.3434	32.1296	32.0136	32.022	32.0094	+	Colony A-3/WT	+	Colony B-3/WT	+	Colony C-3/WT	22	22	22	76.9	76.9	76.9	29.075	89248000000	503	1.03428	0.0455111	0.224385	2.00013	5.08205	0	-0.679414	-14.0011	2.83279	0.00170576	0.470534	5.53258	D0C8J9	Putative enoyl-CoA hydratase PaaB
29.7461	29.7565	29.4598	29.3414	28.6882	28.4574	28.5906	28.6484	30.1528	29.9255	30.0212	29.948	29.3222	29.2376	29.1709	29.0842	+	Colony A-3/WT	+	Colony B-3/WT	+	Colony C-3/WT	7	7	7	35.4	35.4	35.4	27.969	14074000000	116	1.74017	0.00905393	0.372251	3.2177	3.84334	0.00020712	-0.607566	-8.51781	4.52806	0	0.808141	11.2393	D0C8K0	Enoyl-CoA hydratase/isomerase family protein
31.6898	31.577	31.3809	31.5418	30.4959	30.5464	30.5214	30.3788	32.1783	32.0202	31.6172	31.683	31.4515	31.4917	31.4424	31.6661			+	Colony B-3/WT	+	Colony C-3/WT	22	22	22	72.5	72.5	72.5	39.772	56444000000	474	0.160778	0.526637	0.0344515	0.417858	5.43034	0	-1.02732	-16.0534	1.33892	0.0312568	0.361756	2.51131	D0C8K1	Phenylacetate-CoA oxygenase/reductase, PaaK subunit
27.8471	28.2585	27.6647	27.5571	26.6955	26.922	26.8451	26.5473	28.2521	28.0783	27.7032	28.0991	27.8653	27.432	27.3947	27.5411			+	Colony B-3/WT	+	Colony C-3/WT	5	5	5	51.2	51.2	51.2	18.606	3966600000	74	0.709411	0.101899	0.273626	1.45749	2.99767	0.000708955	-0.805807	-5.95272	1.62043	0.0179557	0.474903	3.00141	D0C8K2	Phenylacetate-CoA oxygenase, PaaJ subunit
31.4107	31.5368	31.1248	31.1646	30.2401	30.3024	30.5572	30.3452	31.8426	31.7568	31.6516	31.3867	31.1449	31.138	31.1487	31.0626			+	Colony B-3/WT	+	Colony C-3/WT	16	16	16	63.3	63.3	63.3	28.831	47315000000	279	0.938535	0.05681	0.185679	1.84109	4.38726	0	-0.762334	-10.6229	2.73949	0.002344	0.535889	5.30456	D0C8K3	Phenylacetate-CoA oxygenase, PaaI subunit
30.6275	30.6095	30.1526	30.2047	29.5633	29.6684	29.4398	29.4016	31.0852	30.9013	30.7818	30.4443	30.5978	30.6478	30.6537	30.393			+	Colony B-3/WT			7	7	7	54.8	54.8	54.8	12.359	27434000000	124	0.579409	0.145946	-0.174536	-1.23388	4.73796	0	-1.05479	-12.2195	0.765761	0.115197	0.230097	1.55267	D0C8K4	Phenylacetate-CoA oxygenase, PaaH subunit
31.4064	31.0941	31.1229	30.9506	29.8894	29.8334	29.6794	30.0373	31.4964	31.4708	31.0139	30.8955	30.89	30.9087	30.5979	30.878	+	Colony A-3/WT	+	Colony B-3/WT	+	Colony C-3/WT	14	14	14	58.2	58.2	58.2	37.525	37126000000	279	1.44464	0.0187116	0.32487	2.69273	4.02431	0.000237918	-0.958733	-9.17284	1.23596	0.0388675	0.400537	2.33699	D0C8K5	Phenylacetate-CoA oxygenase, PaaG subunit
33.334	33.1909	33.0718	33.068	32.3304	32.2679	32.1286	32.2329	33.7289	33.9958	33.4578	33.6266	32.9053	33.1792	32.9164	33.1481			+	Colony B-3/WT	+	Colony C-3/WT	38	38	38	68.2	68.2	68.2	77.028	183920000000	794	0.638228	0.123727	0.128947	1.33588	4.09108	0	-0.797296	-9.42545	2.58767	0.00249819	0.665048	4.94758	D0C8K6	Phenylacetic acid degradation protein paaN
26.8653	27.0944	26.8965	26.746	27.212	27.309	26.8775	27.0442	27.26	27.0034	27.1029	27.2729	27.194	27.4868	27.3814	27.4763	+	Colony A-3/WT	+	Colony B-3/WT	+	Colony C-3/WT	10	10	10	35.7	35.7	35.7	50.043	2863200000	113	2.55989	0.00162162	-0.484083	-4.88405	1.24181	0.0324855	-0.273981	-2.34686	1.27058	0.036342	-0.224833	-2.39538	D0C8K7	L-serine dehydratase
28.5067	28.1594	27.8943	28.0118	27.6887	27.6007	28.3017	27.8559	27.9062	27.4559	28.0593	27.8511	28.3322	28.4282	28.7032	28.1981			+	Colony B-3/WT	+	Colony C-3/WT	7	6	6	25.8	24.2	24.2	56.719	5570000000	43	0.792654	0.0824543	-0.272378	-1.59784	1.5797	0.0165714	-0.553657	-2.92901	1.93032	0.00912289	-0.597291	-3.57309	D0C8K9	NADP-dependent fatty aldehyde dehydrogenase
23.5114	22.9507	23.6118	24.4373	24.5428	23.8838	24.7089	23.757	23.3619	24.5095	23.5923	23.7474	24.0096	23.9997	24.0236	23.832							4	4	4	17.6	17.6	17.6	28.304	315180000	29	0.499549	0.1833	-0.338446	-1.09243	0.485797	0.208485	0.256907	1.06765	0.266426	0.431737	-0.16346	-0.647179	D0C8L1	Transcriptional regulator, AraC family
26.7763	26.7216	26.7297	26.9322	26.7352	26.8293	27.0453	26.7403	26.5406	26.1143	26.3975	26.8215	26.5933	26.9266	26.8225	27.0494							6	6	6	37	37	37	28.225	2148900000	54	0.213352	0.444987	-0.0579901	-0.535051	0.029607	0.885823	-0.0104232	-0.0862169	1.12652	0.051007	-0.379465	-2.15366	D0C8L6	Transcriptional regulator, GntR family
26.13	25.7937	26.0422	26.0517	25.8233	25.8219	25.7382	25.2794	26.1493	26.1074	26.2317	26.1407	26.1974	26.5101	26.401	26.4343	+	Colony A-3/WT	+	Colony B-3/WT	+	Colony C-3/WT	7	7	7	24.8	24.8	24.8	33.795	1383600000	86	2.07546	0.00449689	-0.381301	-3.85562	2.5745	0.00210089	-0.719999	-4.9174	1.72021	0.0146908	-0.228435	-3.18127	D0C8L8	Dihydrodipicolinate synthetase family
32.6825	32.7187	32.553	32.6758	32.8561	32.9353	32.8059	32.7629	33.1258	33.1221	33.1932	33.1429	32.5726	32.6535	32.6362	32.4396			+	Colony B-3/WT	+	Colony C-3/WT	10	10	10	68.8	68.8	68.8	15.719	146290000000	313	0.65042	0.119884	0.0820274	1.35684	2.31029	0.00409572	0.264586	4.33638	4.50653	0	0.570521	11.143	D0C8L9	Uncharacterized protein
28.7849	28.7433	28.6553	28.6932	28.4909	28.4984	28.7065	28.603	28.6521	28.7154	28.9133	28.4668	28.029	27.9017	27.3879	27.8503	+	Colony A-3/WT	+	Colony B-3/WT	+	Colony C-3/WT	9	9	9	50.2	50.2	50.2	25.855	7173600000	184	3.19733	0.000450485	0.92694	6.49305	2.71937	0.00180032	0.782471	5.25627	2.75489	0.00228803	0.894681	5.34173	D0C8M2	Epoxyqueuosine reductase QueH
29.0188	29.0845	28.9331	28.893	29.3822	29.1519	29.179	29.1194	28.9699	28.5569	29.104	28.7958	28.3948	28.2427	28.4698	28.3002	+	Colony A-3/WT	+	Colony B-3/WT	+	Colony C-3/WT	7	7	7	52.6	52.6	52.6	18.48	9480100000	140	4.11829	0	0.630443	9.53017	4.47756	0	0.856215	11.0146	2.11306	0.00624599	0.504762	3.93053	D0C8M3	Acetyltransferase, GNAT family
25.1133	25.7892	25.6285	25.6352	25.7236	25.4487	25.8941	25.2882	25.4904	25.8768	25.2809	25.3954	26.0324	26.2046	26.2219	25.8527	+	Colony A-3/WT	+	Colony B-3/WT	+	Colony C-3/WT	9	9	9	29.6	29.6	29.6	45.315	1075400000	50	1.69628	0.0105789	-0.536351	-3.1378	1.64169	0.0141448	-0.48923	-3.03942	1.96882	0.00866667	-0.56705	-3.64702	D0C8M4	Uncharacterized protein
25.4642	25.456	25.0144	25.3315	25.1367	24.7834	24.7493	24.6269	25.1679	25.3589	25.5808	25.3316	24.9222	25.1731	24.8252	24.9934	+	Colony A-3/WT			+	Colony C-3/WT	6	6	6	22.4	22.4	22.4	36.304	708650000	48	1.41123	0.0202798	0.338042	2.63509	0.543533	0.176835	-0.154372	-1.17081	1.83721	0.0113049	0.381353	3.39711	D0C8M9	Serine-type D-Ala-D-Ala carboxypeptidase
28.6298	28.3223	28.1954	28.2878	28.686	28.1323	28.3801	28.4862	28.2965	28.1063	28.731	28.7148	27.4709	27.8775	28.0549	27.7856	+	Colony A-3/WT	+	Colony B-3/WT	+	Colony C-3/WT	9	9	9	42	42	42	21.975	6462600000	126	1.96399	0.0058389	0.561584	3.63771	2.00248	0.00659155	0.623905	3.71225	1.81793	0.0118638	0.664935	3.36116	D0C8N0	Uncharacterized protein
29.3631	29.4296	29.2535	29.371	28.992	29.1832	28.9016	29.048	29.1777	29.5299	28.9536	29.1048	28.6309	28.631	28.5012	28.6861	+	Colony A-3/WT	+	Colony B-3/WT	+	Colony C-3/WT	12	12	12	50	50	50	30.726	10810000000	136	5.04596	0	0.742037	13.8033	2.98311	0.00070632	0.418954	5.91469	2.39496	0.00330547	0.579242	4.51767	D0C8N1	Type IV / VI secretion system protein, DotU family
30.1874	30.151	30.294	30.417	29.9829	30.1637	29.9954	29.9852	30.3876	30.5143	30.4794	30.3168	29.5475	29.4789	29.4381	29.4183	+	Colony A-3/WT	+	Colony B-3/WT	+	Colony C-3/WT	19	19	19	60.8	60.8	60.8	51.976	23115000000	289	4.68097	0	0.791658	11.9458	4.40281	0	0.561134	10.6894	5.71895	0	0.953846	17.9698	D0C8N2	Type VI secretion protein, VC_A0114 family
31.0965	31.1667	31.0644	31.2434	30.7793	30.9352	31.1057	30.7821	31.0308	30.9429	30.9515	30.7908	30.2733	30.0781	30.0407	30.1978	+	Colony A-3/WT	+	Colony B-3/WT	+	Colony C-3/WT	20	20	20	73.4	73.4	73.4	42.074	35736000000	401	5.24004	0	0.995286	14.8989	3.68909	0.000183381	0.753106	7.99198	4.39153	0	0.781497	10.6412	D0C8N3	Type VI secretion-associated protein, ImpA family
33.8544	33.858	33.8242	33.8543	33.5784	33.4517	33.5929	33.6644	33.7119	33.7246	33.5115	33.551	32.6196	32.7452	32.7707	32.6921	+	Colony A-3/WT	+	Colony B-3/WT	+	Colony C-3/WT	58	58	58	71.2	71.2	71.2	100.08	231070000000	1232	7.30788	0	1.14085	33.2533	5.35823	0	0.864949	15.6062	5.14158	0	0.91785	14.3332	D0C8N4	Type VI secretion ATPase, ClpV1 family
31.0285	31.0512	31.014	30.9503	30.538	30.5293	30.6993	30.6081	30.7144	30.5176	30.6884	30.6492	29.9916	29.9282	30.0866	30.1854	+	Colony A-3/WT	+	Colony B-3/WT	+	Colony C-3/WT	12	12	12	56.9	56.9	56.9	27.884	31380000000	267	5.42024	0	0.963063	15.99	3.67677	0.000180791	0.545721	7.95119	3.79444	0.00020339	0.594419	8.34798	D0C8N6	OmpA family protein
29.284	29.2849	29.43	29.3483	28.8307	28.831	28.8532	28.7087	28.5634	28.7554	29.176	28.498	28.4243	28.2833	28.4664	28.3878	+	Colony A-3/WT	+	Colony B-3/WT	+	Colony C-3/WT	10	10	10	42.9	42.9	42.9	37.798	9290000000	122	5.74168	0	0.946366	18.1298	3.73076	0.000192771	0.41549	8.1312	1.19582	0.0436734	0.357788	2.26956	D0C8N7	Type VI secretion-associated protein, BMA_A0400 family
33.6061	33.5674	33.585	33.5062	33.2813	33.1735	33.2915	33.195	33.3395	33.4212	33.3992	33.4041	32.4393	32.5988	32.65	32.7074	+	Colony A-3/WT	+	Colony B-3/WT	+	Colony C-3/WT	75	75	75	72.8	72.8	72.8	143.87	189670000000	1504	5.37725	0	0.967265	15.723	4.18795	0	0.636412	9.803	4.91948	0	0.792102	13.1309	D0C8N8	Type VI secretion protein IcmF
28.8578	28.9752	28.5559	28.7984	28.3839	28.382	28.2982	28.3956	28.4966	28.9863	28.6196	28.4469	27.6124	27.8093	27.7053	28.063	+	Colony A-3/WT	+	Colony B-3/WT	+	Colony C-3/WT	9	9	9	33	33	33	54.647	6811100000	132	3.57106	0.000363636	0.99933	7.60851	2.89448	0.000825623	0.567434	5.68715	2.77392	0.00210656	0.839821	5.38793	D0C8N9	Uncharacterized protein
27.6998	27.7049	27.329	27.3539	27.3432	27.4463	27.499	27.1977	27.5635	27.579	27.584	27.6658	26.6377	26.8846	26.882	26.6842	+	Colony A-3/WT	+	Colony B-3/WT	+	Colony C-3/WT	14	14	14	57.2	57.2	57.2	38.1	3214200000	161	3.05469	0.000487633	0.749767	6.10336	3.18455	0.00022547	0.599418	6.45737	4.69142	0	0.825927	11.9956	D0C8P0	Type VI secretion protein, VC_A0111 family
30.2253	30.2162	30.1197	30.0013	29.9326	29.9096	29.7536	29.7375	29.957	30.3018	29.945	30.12	29.1743	29.3253	29.4223	29.5054	+	Colony A-3/WT	+	Colony B-3/WT	+	Colony C-3/WT	31	31	31	59.4	59.4	59.4	70.037	18942000000	491	3.94561	0	0.783773	8.88276	2.79736	0.00134907	0.476494	5.44521	3.23214	0.000533333	0.724145	6.591	D0C8P1	Type VI secretion protein, VC_A0110 family
27.1703	27.3858	26.9786	27.0539	26.9385	26.3638	26.8037	26.5428	26.7691	26.5069	26.8127	27.1164	25.8799	25.9732	26.0064	25.8498	+	Colony A-3/WT	+	Colony B-3/WT	+	Colony C-3/WT	9	9	9	42.4	42.4	42.4	18.016	2020200000	65	4.82922	0	1.21981	12.6701	2.80898	0.00121562	0.734873	5.47375	3.27278	0.000550898	0.873971	6.70685	D0C8P2	Type VI secretion system lysozyme-related protein
34.2432	34.3471	33.9575	34.0533	33.4592	33.4661	33.1163	33.3422	33.4921	33.9182	33.4486	33.41	32.2833	32.4927	32.2619	32.519	+	Colony A-3/WT	+	Colony B-3/WT	+	Colony C-3/WT	12	12	12	63.5	63.5	63.5	18.743	224120000000	371	5.39076	0	1.76104	15.8064	3.98305	0.000231047	0.956716	9.01972	3.88046	0.000216216	1.17801	8.64873	D0C8P3	Type VI secretion system effector, Hcp1 family
34.1605	34.0153	33.9471	34.0942	34.086	34.0454	34.1078	34.0217	34.0963	34.1798	34.153	34.2684	32.8526	32.9197	32.9201	32.8319	+	Colony A-3/WT	+	Colony B-3/WT	+	Colony C-3/WT	29	29	29	77.9	77.9	77.9	55.937	296220000000	726	6.31725	0	1.1732	22.6754	7.75565	0	1.18416	39.5152	7.0785	0	1.29333	30.4374	D0C8P4	Type VI secretion protein, EvpB/VC_A0108 family
33.1138	33.2229	33.2639	33.2207	32.8682	33.0046	32.909	33.1731	33.0806	32.687	32.9716	33.0582	31.6392	31.6993	31.7695	31.749	+	Colony A-3/WT	+	Colony B-3/WT	+	Colony C-3/WT	11	11	11	70.7	70.7	70.7	19.116	144590000000	447	7.40074	0	1.49106	34.4654	5.61898	0	1.27447	17.2823	4.89184	0	1.23507	12.9881	D0C8P5	Type VI secretion protein, VC_A0107 family
33.0204	32.9844	32.9738	32.8514	32.7888	32.7824	32.7187	32.723	32.8583	32.5852	32.9103	32.8342	31.6171	31.643	31.7452	31.8372	+	Colony A-3/WT	+	Colony B-3/WT	+	Colony C-3/WT	9	9	9	62.6	62.6	62.6	21.563	130680000000	332	5.99089	0	1.24691	19.977	5.91161	0	1.04259	19.3704	4.75795	0	1.08639	12.3169	D0C8P6	Uncharacterized protein (Fragment)
26.9516	27.3023	27.2833	27.0691	27.1282	27.4	26.9058	26.8884	26.9537	27.1688	26.9281	27.2734	26.5174	26.3896	26.2134	26.5206	+	Colony A-3/WT	+	Colony B-3/WT	+	Colony C-3/WT	4	4	4	48.1	48.1	48.1	15.15	2466700000	56	3.2484	0.000470588	0.741321	6.63718	2.52023	0.00247943	0.670334	4.79427	3.03739	0.00129756	0.670737	6.05737	D0C8P7	Uncharacterized protein
24.7369	25.3625	25.4382	25.9727	26.1209	26.6055	26.0212	25.5801	26.7834	26.7383	25.7166	25.6935	24.7367	25.5793	23.2029	24.4172			+	Colony B-3/WT	+	Colony C-3/WT	7	7	7	31.8	31.8	31.8	41.91	1022200000	30	0.802285	0.0803705	0.893526	1.61399	1.61077	0.0154387	1.5979	2.98419	1.63063	0.017799	1.74891	3.01964	D0C8R0	GroES-like protein
29.1618	29.0609	29.0954	29.1017	29.1666	29.0472	29.6186	29.1213	29.4607	29.2589	29.6611	29.461	29.1429	29.2888	29.1215	28.8373					+	Colony C-3/WT	7	7	7	51.7	51.7	51.7	15.881	12263000000	135	0.0260326	0.895294	0.00735855	0.0760931	0.384543	0.275698	0.140806	0.880365	1.5631	0.0203376	0.362801	2.89967	D0C8R1	Uncharacterized protein
27.2575	27.2435	26.8805	26.9617	27.6501	27.3624	27.4792	27.4289	27.3164	27.2017	27.2741	27.583	27.2497	27.9044	27.9893	27.9094	+	Colony A-3/WT			+	Colony C-3/WT	7	7	7	30.3	30.3	30.3	38.905	3668900000	123	1.85471	0.00744981	-0.677402	-3.42989	0.762685	0.101477	-0.283079	-1.54749	1.14979	0.0482769	-0.419429	-2.19252	D0C8R4	Uncharacterized protein
27.4273	27.3734	27.1633	27.2818	27.0506	27.3149	27.3629	27.2057	27.5547	27.401	27.3913	27.0986	27.3449	27.3541	27.5818	27.4926			+	Colony B-3/WT			9	9	9	64.9	64.9	64.9	20.418	3238900000	74	0.806919	0.0795542	-0.131892	-1.62175	1.23486	0.0330059	-0.209799	-2.33515	0.311032	0.380448	-0.0819545	-0.73755	D0C8R5	SMI1_KNR4 domain-containing protein
33.7364	33.668	33.5802	33.5742	32.6576	32.6165	32.7805	32.6609	33.6168	33.6512	33.5126	33.5384	33.6211	33.7587	33.6368	33.7333			+	Colony B-3/WT	+	Colony C-3/WT	36	36	36	74.7	74.7	74.7	62.188	223860000000	773	0.407456	0.23904	-0.0477943	-0.923588	6.05352	0	-1.00861	-20.4693	1.201	0.0431637	-0.107718	-2.27826	D0C8R9	Pyruvate carboxylase subunit A
30.9561	30.9437	30.7679	30.8293	29.8048	29.9273	30.0264	29.9841	30.6357	30.9482	30.4996	30.7429	30.7928	30.9364	30.885	31.0287			+	Colony B-3/WT			25	25	25	66.5	66.5	66.5	57.506	33572000000	336	0.217588	0.439789	-0.0365067	-0.544207	5.11016	0	-0.975065	-14.157	0.981639	0.0692762	-0.204138	-1.91269	D0C8S0	Uncharacterized protein
32.8919	32.9951	32.7564	32.9966	31.9754	32.0023	32.1746	32.0239	32.995	32.8753	32.6867	32.4096	32.7585	32.7868	32.5493	32.5066	+	Colony A-3/WT	+	Colony B-3/WT			23	23	23	93.7	93.7	93.7	29.635	126990000000	629	1.5334	0.015132	0.259686	2.84739	3.43962	0.000262774	-0.606266	-7.19972	0.255569	0.444721	0.0913343	0.624679	D0C8S1	Putative hydro-lyase HMPREF0010_01151
33.8104	33.8722	33.5275	33.9859	32.85	33.0136	32.7781	32.9957	33.7894	33.6086	33.4659	33.1974	33.4394	33.4279	33.6153	33.5073	+	Colony A-3/WT	+	Colony B-3/WT			16	16	16	79.5	79.5	79.5	26.908	226730000000	371	1.52288	0.0156158	0.301532	2.82893	3.76024	0.000199377	-0.588132	-8.23097	0.0471342	0.849286	0.0178175	0.134835	D0C8S2	5-oxoprolinase subunit A
28.7351	28.8771	28.4169	28.4999	27.4694	27.4451	27.6921	27.7451	28.4095	28.5621	23.664	28.2262	28.5379	28.6318	28.8542	28.654			+	Colony B-3/WT			3	3	3	7.7	7.7	7.7	44.54	6440400000	31	0.110161	0.638301	-0.0372181	-0.297716	4.40035	0	-1.08155	-10.6789	0.573913	0.186819	-1.45403	-1.22426	D0C8S3	Transporter, branched chain amino acid:cation symporter (LIVCS) family protein
26.4062	26.2646	26.0294	25.7446	25.7537	25.0656	24.3353	25.6065	23.8716	26.3851	25.6314	25.971	25.9318	25.8111	25.9353	26.3071			+	Colony B-3/WT			4	4	4	16.2	16.2	16.2	34.236	988360000	20	0.261555	0.381249	0.114915	0.637111	1.26162	0.0313068	-0.80603	-2.38025	0.418141	0.284842	-0.531521	-0.94356	D0C8S4	LysR substrate binding domain protein
28.2733	28.1724	28.2609	28.3452	27.8	27.6893	27.7936	28.0089	28.7611	28.2488	28.701	28.8097	27.5054	27.1049	27.2703	27.2328	+	Colony A-3/WT	+	Colony B-3/WT	+	Colony C-3/WT	3	3	3	61	61	61	11.149	5409000000	72	4.43932	0	0.984604	10.8471	2.64726	0.0018683	0.544602	5.08569	3.9205	0.000222222	1.35181	8.79191	D0C8S5	Uncharacterized protein
26.6055	26.6214	26.3029	26.5599	27.5317	27.5021	27.8118	27.3535	27.148	27.3105	27.3219	27.0821	27.3824	27.4937	27.3881	27.2894	+	Colony A-3/WT			+	Colony C-3/WT	10	10	10	37.1	37.1	37.1	45.355	3031900000	78	4.27545	0	-0.865963	-10.1556	0.761799	0.101759	0.161372	1.546	1.25705	0.0371082	-0.17276	-2.37253	D0C8S6	Uncharacterized protein
24.2085	25.0072	23.8899	24.4783	24.1709	22.637	22.073	24.2625	24.3917	24.3147	23.4986	24.2364	23.525	23.2315	23.6918	23.6645	+	Colony A-3/WT			+	Colony C-3/WT	4	4	4	18.2	18.2	18.2	25.546	260750000	25	1.81226	0.00794182	0.867774	3.3506	0.1673	0.536124	-0.242334	-0.432778	1.33945	0.0312842	0.582162	2.5122	D0C8S7	HAD hydrolase, family IA, variant 1
25.342	25.5173	25.4943	25.3525	25.6726	25.4392	25.4529	25.8695	25.2904	25.4378	25.2979	25.6665	25.3898	25.3333	25.6581	25.413							4	4	4	36.1	36.1	36.1	16.309	879740000	47	0.0941861	0.678376	-0.0220151	-0.257993	0.60684	0.151125	0.160009	1.28165	0.0806821	0.759847	-0.0253897	-0.223639	D0C8S8	Acetyltransferase, GNAT family
28.8386	28.761	28.9124	28.8645	28.7682	28.5585	28.7524	28.8325	28.9291	28.7331	28.9478	28.9643	28.6275	28.7509	28.708	28.5138	+	Colony A-3/WT			+	Colony C-3/WT	17	17	17	54.1	54.1	54.1	35.773	8811400000	197	1.72113	0.00934851	0.194078	3.18293	0.442656	0.235176	0.0779042	0.988977	1.75529	0.0135886	0.24352	3.24539	D0C8T1	3-hydroxyacyl-CoA dehydrogenase, NAD binding domain protein
25.9114	26.0399	26.4966	25.6311	25.5612	25.1174	25.9509	25.4788	25.9138	24.6804	25.9685	25.9088	26.0637	25.9461	26.2166	26.0108			+	Colony B-3/WT			8	8	8	31.9	31.9	31.9	39.236	1154000000	55	0.0749585	0.732155	-0.0395594	-0.20885	1.59102	0.0163093	-0.532222	-2.94907	0.668459	0.147252	-0.441409	-1.38774	D0C8T3	Transcriptional regulator, MerR family
26.4563	26.4008	26.4393	26.3129	27.0059	26.7348	27.1435	26.6536	26.4182	25.9063	27.051	26.9365	26.663	27.2798	27.1984	26.9399	+	Colony A-3/WT					4	4	4	24.1	24.1	24.1	16.256	2218200000	34	2.30295	0.00271663	-0.61792	-4.32089	0.318652	0.333248	-0.135806	-0.752683	0.726544	0.127533	-0.442255	-1.48651	D0C8T4	DUF2147 domain-containing protein
24.036	22.5912	23.045	22.5275	23.5685	22.6778	24.9914	24.0176	23.5169	24.3618	23.7875	23.7342	25.1243	24.0269	24.4884	23.6242	+	Colony A-3/WT					4	4	4	14.2	14.2	14.2	48.186	108730000	13	1.43066	0.0194903	-1.26601	-2.66857	NaN	1	0	NaN	NaN	1	0	NaN	D0C8T5	Transporter, major facilitator family protein
26.4882	26.4028	22.7209	26.1652	26.655	26.3409	23.6805	26.811	24.192	26.3785	24.3863	26.8298	26.3691	26.5016	26.4216	26.1715							5	5	5	29	29	29	17.971	1480500000	16	0.453777	0.209515	-0.921655	-1.0094	0.27627	0.380716	-0.494081	-0.667401	0.648242	0.154579	-0.91932	-1.3531	D0C8U2	Transcriptional regulator, AsnC family
30.414	30.3484	30.2816	30.3644	30.3977	30.1472	30.2064	30.1821	30.3162	30.3632	30.3886	30.3437	30.529	30.711	30.7577	30.6005	+	Colony A-3/WT	+	Colony B-3/WT	+	Colony C-3/WT	36	36	36	57	57	57	97.903	27263000000	570	2.63859	0.00149371	-0.297472	-5.06545	2.79555	0.00133779	-0.416196	-5.44077	2.80913	0.00191632	-0.296625	-5.47413	D0C8U4	DNA mismatch repair protein MutS
27.9303	28.5526	28.2257	28.968	27.4039	27.7718	27.8572	27.295	27.9574	27.4473	28.2096	27.87	28.281	27.4727	27.8594	24.4461							2	2	2	30.8	30.8	30.8	12.253	5717100000	39	0.770342	0.0869673	1.40435	1.56038	0.264171	0.393693	0.567173	0.642523	0.430296	0.276266	0.856298	0.966147	D0C8U6	Ferredoxin
29.0239	29.0274	28.763	28.8396	28.9439	28.7483	28.8724	28.9146	29.1666	28.8819	29.1823	29.2086	28.5319	28.5978	28.6123	28.4778	+	Colony A-3/WT	+	Colony B-3/WT	+	Colony C-3/WT	11	11	11	55	55	55	27.305	9557900000	157	2.55612	0.00168733	0.358525	4.87547	2.98714	0.000707635	0.314847	5.92521	3.27803	0.000555891	0.554933	6.72193	D0C8U7	Peptidase_M15_3 domain-containing protein
28.9052	29.0918	29.1287	28.9814	29.0546	29.3032	29.1882	29.0181	29.137	28.9929	29.2283	29.0634	29.5984	29.6537	29.4766	29.6828	+	Colony A-3/WT	+	Colony B-3/WT	+	Colony C-3/WT	13	13	13	80.6	80.6	80.6	24.821	12439000000	158	3.81041	0.000128655	-0.576089	-8.40311	2.93952	0.000690909	-0.461845	-5.80197	3.4778	0.000486486	-0.497464	-7.31652	D0C8U8	O-methyltransferase
30.929	30.9469	30.9393	31.0289	31.6161	31.5867	31.4465	31.4104	31.5002	31.341	31.1254	31.1615	31.5402	31.394	31.2477	31.3351	+	Colony A-3/WT					13	13	13	70.4	70.4	70.4	31.429	50640000000	230	3.1542	0.000441905	-0.418252	-6.37326	0.854124	0.0824228	0.135675	1.70062	0.403004	0.294985	-0.097259	-0.915232	D0C8U9	Universal stress family protein
26.7116	26.4859	26.4396	26.5177	26.814	26.2896	26.095	26.4686	26.4008	26.8917	26.4918	26.5772	27.2262	27.2106	27.1834	26.9324	+	Colony A-3/WT	+	Colony B-3/WT	+	Colony C-3/WT	7	7	7	30.7	30.7	30.7	22.536	2176600000	87	3.21942	0.000459406	-0.599422	-6.55507	2.29348	0.00427068	-0.72132	-4.30091	2.29683	0.00415639	-0.547767	-4.30797	D0C8V1	Putative YigZ family protein
25.59	23.9934	26.6573	26.1877	26.198	24.8925	23.7481	26.4886	26.1207	26.1482	24.7686	26.3802	27.0325	26.5067	26.6811	27.1498	+	Colony A-3/WT	+	Colony B-3/WT	+	Colony C-3/WT	9	9	9	28.5	28.5	28.5	44.286	2375700000	24	1.07064	0.0419655	-1.23543	-2.06057	1.22989	0.0334852	-1.51074	-2.32678	1.32938	0.0320593	-0.988101	-2.49506	D0C8V2	Membrane fusion protein (MFP) family protein
30.2994	30.6153	30.5474	30.2536	30.2726	30.1542	30.5697	30.4559	30.5064	30.3497	30.7182	30.8031	30.9492	30.9625	30.9259	30.9827	+	Colony A-3/WT	+	Colony B-3/WT	+	Colony C-3/WT	11	11	11	74.1	74.1	74.1	23.1	31274000000	202	2.94776	0.000646667	-0.526153	-5.82313	3.13973	0.000323887	-0.591938	-6.33345	1.88674	0.00988208	-0.360736	-3.49024	D0C8V8	Fe/S biogenesis protein NfuA
27.5986	27.141	27.0687	27.2183	28.1938	28.1287	28.1759	27.9872	27.7422	27.6807	28.1182	28.0599	28.7242	28.7262	28.6718	28.6629	+	Colony A-3/WT	+	Colony B-3/WT	+	Colony C-3/WT	23	23	23	47.2	47.2	47.2	82.817	5717900000	149	4.70851	0	-1.43966	-12.0774	4.59915	0	-0.574882	-11.5628	3.41676	0.000467532	-0.796044	-7.13049	D0C8V9	TonB-dependent siderophore receptor
26.328	26.5621	26.3127	26.1749	26.4312	26.0315	26.6169	25.9947	26.6317	25.8906	26.7858	26.6943	27.1294	26.9841	27.059	26.8491	+	Colony A-3/WT	+	Colony B-3/WT	+	Colony C-3/WT	10	10	10	49.6	49.6	49.6	39.487	1945100000	55	3.23384	0.000466801	-0.660964	-6.59582	2.38555	0.00375629	-0.73682	-4.4973	1.24668	0.037942	-0.504804	-2.35505	D0C8W0	Uncharacterized protein
28.5948	28.4926	28.3926	28.1566	28.3176	27.8106	28.1166	28.033	28.3729	28.2086	28.5575	28.4521	28.9009	29.2673	29.4133	29.2279	+	Colony A-3/WT	+	Colony B-3/WT	+	Colony C-3/WT	10	10	10	35.5	35.5	35.5	37.765	7887700000	93	2.83694	0.000794992	-0.793207	-5.54288	3.54282	0.000280519	-1.13289	-7.51908	3.07342	0.00106733	-0.804574	-6.15347	D0C8W1	Hydrolase, alpha/beta domain protein
32.1755	32.2469	32.0399	32.243	32.6453	32.6786	32.6042	32.5232	32.364	32.3994	32.5282	32.4267	32.766	32.9056	32.8863	32.7273	+	Colony A-3/WT	+	Colony B-3/WT	+	Colony C-3/WT	12	12	12	60.8	60.8	60.8	22.142	120010000000	297	4.20437	0	-0.644985	-9.86831	2.03158	0.00631788	-0.208471	-3.76909	3.3549	0.000451411	-0.391717	-6.94592	D0C8W2	Carbonate dehydratase
27.8791	27.9807	27.8171	27.9683	28.2236	27.9976	28.0753	27.9703	27.9991	27.7688	28.2656	27.9682	28.0099	28.1931	28.1684	28.0717	+	Colony A-3/WT					10	10	10	59.9	59.9	59.9	22.946	5266800000	139	1.87336	0.00718644	-0.199514	-3.46497	0.253851	0.406579	-0.044126	-0.6211	0.44744	0.264978	-0.110368	-0.997777	D0C8W3	Arylesterase
24.4219	24.3885	24.4138	24.2153	24.5264	24.332	24.3939	24.2992	24.3681	24.5478	24.3207	24.5894	23.2192	24.2922	23.7033	24.1586	+	Colony A-3/WT	+	Colony B-3/WT	+	Colony C-3/WT	3	3	3	19.6	19.6	19.6	25.708	397660000	46	1.08353	0.040964	0.51652	2.08203	1.14977	0.0396243	0.544553	2.19249	1.29266	0.0344631	0.61317	2.43274	D0C8W4	ABC transporter, ATP-binding protein
23.8804	23.8051	23.6764	23.5987	24.1779	23.9626	24.3844	23.5902	24.8254	23.9084	24.6287	23.8625	23.6592	24.0935	24.6017	24.171							3	3	3	4.4	4.4	4.4	91.353	343360000	29	0.989613	0.0503007	-0.391228	-1.92593	0.152623	0.562574	-0.102555	-0.399033	0.224333	0.484593	0.174897	0.558712	D0C8W5	Efflux ABC transporter, permease protein
26.3362	26.5062	26.5139	26.6377	26.7169	26.5287	26.4114	26.3553	26.6633	26.7313	26.4424	26.3801	26.4789	26.1958	26.139	26.4018							7	7	7	35.1	35.1	35.1	26.657	1858300000	93	0.977772	0.0513944	0.194628	1.90627	0.883064	0.077	0.199202	1.74885	1.11483	0.0521113	0.250389	2.13416	D0C8W7	Biosynthetic peptidoglycan transglycosylase
30.5722	30.5561	30.5811	30.5544	30.7738	30.6978	30.7024	30.6048	30.5726	30.6445	30.7115	30.6503	30.653	30.7878	30.8838	30.7363	+	Colony A-3/WT					41	41	36	68.2	68.2	61.8	78.931	33344000000	578	2.19167	0.00350557	-0.199278	-4.08966	0.552367	0.172575	-0.0705304	-1.18641	1.12474	0.0512137	-0.12051	-2.1507	D0C8W8	Polyphosphate kinase
31.7223	31.6429	31.689	31.596	31.8266	31.7764	31.7853	31.8917	31.5923	31.7638	31.5867	31.6711	32.009	31.9102	31.8866	31.9503	+	Colony A-3/WT	+	Colony B-3/WT	+	Colony C-3/WT	22	22	22	90.1	90.1	90.1	33.773	70266000000	422	3.44028	0.000334842	-0.276447	-7.20171	1.71512	0.0123361	-0.119007	-3.17199	2.93122	0.0017027	-0.28552	-5.78066	D0C8X0	LysR substrate binding domain protein
27.0246	26.8727	27.028	27.0772	27.1064	27.048	27.0133	26.9403	27.6471	27.2852	27.2243	26.887	27.8475	27.8842	27.7089	27.8028	+	Colony A-3/WT	+	Colony B-3/WT	+	Colony C-3/WT	11	11	11	47.1	47.1	47.1	34.835	3324100000	96	5.06394	0	-0.810192	-13.9015	5.30206	0	-0.78383	-15.2662	1.85603	0.0107425	-0.549943	-3.43238	D0C8X1	Hydrolase, alpha/beta domain protein
30.9442	30.7716	30.6928	30.749	31.2315	31.0561	31.1438	31.167	31.2364	31.1272	31.243	31.2257	31.3131	31.4458	31.4713	31.4366	+	Colony A-3/WT	+	Colony B-3/WT	+	Colony C-3/WT	23	23	23	74.3	74.3	74.3	42.249	46151000000	408	4.1612	0	-0.627305	-9.69743	2.72739	0.00173077	-0.267097	-5.27549	2.46932	0.00277759	-0.208601	-4.68062	D0C8X2	Rubredoxin--NAD(+) reductase
26.3872	26.5248	26.117	26.3456	26.2657	26.4529	25.9659	26.2114	26.2912	25.8618	26.2459	26.2537	25.9461	25.8818	25.9555	25.2174	+	Colony A-3/WT	+	Colony B-3/WT			8	8	8	75.2	75.2	75.2	16.435	1418600000	106	1.62279	0.0119765	0.593466	3.00561	1.22283	0.033972	0.473789	2.31491	1.04328	0.0604645	0.41297	2.01508	D0C8X4	Uncharacterized protein
24.7891	23.7473	23.7122	24.0701	24.9462	24.3169	24.9892	25.7742	23.6365	24.0824	25.7725	24.6316	25.2542	24.0738	25.324	25.3985	+	Colony A-3/WT					2	2	2	16	16	16	18.708	436570000	23	1.22802	0.0300381	-0.932942	-2.32365	0.00462815	0.983063	-0.00600243	-0.0138485	0.375619	0.317575	-0.481889	-0.863378	D0C8X5	Uncharacterized protein
33.0191	32.9573	33.0725	32.9728	32.8697	32.7509	32.7636	32.8413	32.8773	32.8968	32.8747	32.8745	32.891	33.0298	33.0937	33.0299			+	Colony B-3/WT	+	Colony C-3/WT	40	40	40	78.7	78.7	78.7	59.492	157390000000	948	0.0392787	0.84769	-0.00566387	-0.11325	2.12725	0.0054474	-0.204717	-3.95902	1.63225	0.0176922	-0.130285	-3.02252	D0C8X6	Lysine--tRNA ligase
33.7175	33.6516	33.6459	33.6726	33.5664	33.6249	33.4806	33.5357	33.4816	33.159	33.6105	33.6328	33.2525	33.2161	33.2971	33.2976	+	Colony A-3/WT	+	Colony B-3/WT			30	30	30	85.8	85.8	85.8	53.094	230480000000	720	5.40994	0	0.40608	15.9257	3.67775	0.000181303	0.286068	7.95443	0.943218	0.0765453	0.20513	1.84887	D0C8X7	Uncharacterized protein
30.8027	30.8174	30.6528	30.6418	30.9285	30.776	30.9138	30.816	31.0904	30.8336	31.1504	30.9909	31.1186	31.1697	31.2499	31.1251	+	Colony A-3/WT	+	Colony B-3/WT			15	15	15	57.6	57.6	57.6	35.26	40194000000	269	3.63257	0.000387435	-0.437133	-7.80637	3.16874	0.000331263	-0.307236	-6.41343	1.0216	0.0634023	-0.149476	-1.97906	D0C8X9	Sulfate adenylyltransferase subunit 2
31.7227	31.7327	31.6052	31.654	31.547	31.5753	31.6405	31.4831	31.8311	31.9204	31.7141	31.7143	31.7913	31.918	32.0105	32.0396	+	Colony A-3/WT	+	Colony B-3/WT			31	31	31	73.2	73.2	73.2	59.243	69626000000	599	2.20369	0.00344966	-0.261196	-4.11429	2.95608	0.000701107	-0.378363	-5.84461	0.992295	0.0672247	-0.144875	-1.93038	D0C8Y0	Sulfate adenylyltransferase subunit 1
27.744	27.6567	27.4238	27.4383	27.8925	27.6649	27.9996	27.8875	27.587	27.2492	27.8457	27.9227	27.6379	27.9027	27.93	27.7476	+	Colony A-3/WT					6	6	6	41.2	41.2	41.2	20.714	4247300000	106	1.19618	0.0318416	-0.238832	-2.27016	0.232492	0.43695	0.0565844	0.576128	0.405572	0.293188	-0.15342	-0.920054	D0C8Y1	Uncharacterized protein
29.2042	29.5608	29.4334	29.0934	29.0632	28.8375	29.2168	28.7119	28.756	28.655	29.057	29.0474	29.4793	29.4978	29.5291	29.7843	+	Colony A-3/WT	+	Colony B-3/WT	+	Colony C-3/WT	8	8	8	70.6	70.6	70.6	19.344	11977000000	122	1.00452	0.0487303	-0.249681	-1.95069	2.43545	0.00332517	-0.615283	-4.60595	2.8466	0.00171674	-0.69377	-5.56691	D0C8Y2	Uncharacterized protein
27.8328	27.495	27.3077	27.905	27.0635	28.1729	27.0616	27.0531	27.8743	28.1744	27.6086	27.5153	27.3442	27.4955	26.9572	27.1785	+	Colony A-3/WT			+	Colony C-3/WT	4	4	4	13	13	13	48.709	3788600000	44	1.12258	0.0381153	0.391287	2.14709	0.115871	0.637994	0.0939298	0.311689	1.57783	0.0196554	0.549305	2.9257	D0C8Y3	Citrate transporter
29.2555	29.1809	29.2476	29.3372	29.5001	29.5623	29.5702	29.3414	29.2641	29.6037	29.1808	29.3441	29.3731	29.4766	29.5871	29.5836	+	Colony A-3/WT					15	15	15	40.4	40.4	40.4	49.863	13523000000	222	2.22308	0.00342793	-0.249811	-4.15419	0.0556126	0.800793	-0.0116024	-0.157779	0.733904	0.125265	-0.156919	-1.49896	D0C8Y4	Uncharacterized protein
30.5664	30.5521	30.453	30.4593	30.8294	30.6838	30.6989	30.6303	30.7546	30.6855	30.6017	30.6372	30.9016	30.9249	30.7471	30.7188	+	Colony A-3/WT			+	Colony C-3/WT	25	25	25	71.7	71.7	71.7	38.161	33555000000	476	2.70143	0.00133908	-0.315428	-5.21348	0.834565	0.0864015	-0.112517	-1.66798	1.31358	0.0329853	-0.153354	-2.46821	D0C8Y5	Transcriptional regulator, LysR family
32.2669	32.2402	32.1632	32.082	32.2042	32.0511	32.0496	32.1375	32.0903	32.203	32.1241	32.3051	32.2134	32.3615	32.4502	32.4821	+	Colony A-3/WT	+	Colony B-3/WT	+	Colony C-3/WT	29	29	29	65.9	65.9	65.9	59.382	98210000000	540	1.37936	0.0219833	-0.188728	-2.58037	2.02717	0.00634983	-0.266245	-3.76046	1.3647	0.0299076	-0.196205	-2.55529	D0C8Y6	Putative isocitrate lyase
32.7931	32.809	32.8946	33.0419	33.1209	33.2661	33.1062	32.9817	33.1519	33.3077	33.0244	33.1967	32.3291	32.4313	32.2536	32.0138	+	Colony A-3/WT	+	Colony B-3/WT	+	Colony C-3/WT	14	14	14	53.5	53.5	53.5	17.543	157420000000	595	2.99537	0.000590051	0.627678	5.94669	3.72498	0.000191617	0.861752	8.11175	3.86085	0.000211454	0.913208	8.57936	D0C8Y7	Uncharacterized protein
26.4989	26.6058	25.6433	26.0356	25.9157	26.0071	25.5873	26.0947	26.3613	26.2606	26.6108	26.5082	26.6287	26.8527	26.7996	26.8859	+	Colony A-3/WT	+	Colony B-3/WT	+	Colony C-3/WT	4	4	4	58.9	58.9	58.9	12.011	1726200000	73	1.39075	0.0216372	-0.595801	-2.59989	3.42021	0.000259615	-0.890526	-7.1409	1.99681	0.00871483	-0.35651	-3.70123	D0C8Y8	Uncharacterized protein
24.412	24.0837	24.4478	24.6558	24.4158	25.2186	24.3745	24.2569	24.2244	22.655	23.9383	24.8617	25.4741	24.3821	24.388	24.2787							4	4	4	54	54	54	10.968	295900000	17	0.319518	0.317331	-0.230875	-0.7544	0.0637752	0.774924	-0.0642476	-0.179538	0.622959	0.164762	-0.710864	-1.30955	D0C8Z1	Urease subunit gamma
25.2614	25.6737	25.7106	25.8573	25.6809	25.5608	25.3509	25.5151	25.2461	25.1211	25.9032	25.435	26.189	25.8748	25.8173	25.7514			+	Colony B-3/WT	+	Colony C-3/WT	4	4	4	37.5	37.5	37.5	17.901	1056800000	52	0.890229	0.0644284	-0.282368	-1.76078	1.7383	0.0119364	-0.381166	-3.21427	1.29986	0.0339572	-0.481777	-2.44493	D0C8Z4	Urease accessory protein UreE
28.2649	28.2002	28.1733	28.1832	28.1509	28.1829	28.1252	28.0412	28.1137	27.7375	28.1403	28.1391	28.0779	28.2118	28.2381	28.1767							8	8	8	45.6	45.6	45.6	22.106	5608600000	114	0.302263	0.336696	0.0292926	0.720031	0.504315	0.198393	-0.0510597	-1.10098	0.65872	0.150418	-0.143459	-1.37108	D0C8Z6	Urease accessory protein UreG
27.2054	27.6636	27.4038	27.2686	27.6498	27.3154	27.8969	27.7678	28.0015	26.9295	27.6346	27.3891	27.6977	27.499	27.7804	27.23							7	7	7	47.5	47.5	47.5	20.864	3694000000	67	0.474102	0.197995	-0.166467	-1.04647	0.245996	0.417457	0.105669	0.604664	0.0896208	0.738447	-0.0631061	-0.246461	D0C8Z8	Ribosomal RNA small subunit methyltransferase D
27.3997	27.1883	27.2517	27.2829	27.5513	27.3678	27.4944	27.4123	27.5183	27.6429	27.4106	27.4562	27.5464	27.6149	27.6943	27.6037	+	Colony A-3/WT	+	Colony B-3/WT			17	17	17	30.4	30.4	30.4	74.451	3585600000	151	3.09698	0.00050457	-0.334155	-6.21698	1.6739	0.0136609	-0.158358	-3.09734	0.932715	0.0781134	-0.107817	-1.83142	D0C8Z9	Peptidoglycan D,D-transpeptidase MrdA
27.1857	27.3122	26.8887	27.216	26.8937	27.2075	27.035	26.8034	27.1981	27.375	27.2262	27.3265	27.425	27.4674	27.3082	27.0003			+	Colony B-3/WT			8	8	8	46.6	46.6	46.6	19.165	2928900000	88	0.488156	0.189853	-0.149602	-1.07191	1.21019	0.0348442	-0.31535	-2.29367	0.0586058	0.816156	-0.0187998	-0.165795	D0C900	Uncharacterized protein
27.485	27.4927	27.3051	27.3217	27.458	27.3967	27.4428	27.1319	27.3826	28.0708	27.3975	27.523	27.5635	28.0006	27.6402	27.5516	+	Colony A-3/WT	+	Colony B-3/WT			14	14	14	30.9	30.9	30.9	51.126	3683500000	129	1.30558	0.0251601	-0.287879	-2.45462	1.35799	0.0255769	-0.33161	-2.54383	0.194275	0.529158	-0.0955052	-0.493307	D0C901	Uncharacterized protein
32.6771	32.609	32.5805	32.6458	32.5623	32.4969	32.6076	32.5938	32.5213	32.5338	32.6545	32.6913	32.7684	32.9593	32.8008	32.8872	+	Colony A-3/WT	+	Colony B-3/WT	+	Colony C-3/WT	20	20	20	93.1	93.1	93.1	24.022	130760000000	442	2.47839	0.00189175	-0.225833	-4.70073	2.94271	0.000692168	-0.288766	-5.81014	2.23469	0.00456571	-0.253695	-4.1782	D0C902	Adenylate kinase
27.3415	27.1137	27.0199	27.3629	27.5869	27.1506	27.3742	27.4173	27.4572	27.2373	27.1055	27.32	27.0931	27.1627	27.2946	27.2577							7	7	7	37	37	37	25.86	3022800000	95	0.0265225	0.894058	0.00745773	0.077485	0.906789	0.0722251	0.180254	1.78833	0.394181	0.30217	0.0779762	0.898614	D0C904	Endonuclease III
25.9321	25.9551	25.8615	25.7983	25.4409	25.7956	25.6973	25.7694	25.5535	25.434	25.3973	25.8589	25.9296	25.7631	25.9063	25.7608					+	Colony C-3/WT	5	5	5	30.8	30.8	30.8	29.36	1065000000	50	0.349186	0.289704	0.0467858	0.812526	0.894726	0.0745758	-0.164127	-1.76826	1.29958	0.0340479	-0.279011	-2.44445	D0C905	Ion-translocating oxidoreductase complex subunit B
30.3711	30.2283	30.2566	30.4197	30.4667	30.6079	30.524	30.2983	30.1652	30.1974	30.2856	30.422	29.3289	29.5676	29.7699	29.6023	+	Colony A-3/WT	+	Colony B-3/WT	+	Colony C-3/WT	25	25	25	79.4	79.4	79.4	50.642	23160000000	346	3.50254	0.000344988	0.751718	7.39307	3.7218	0.000189911	0.907012	8.10109	3.20518	0.000655367	0.700347	6.51503	D0C906	Glutamate dehydrogenase
34.8095	34.7365	34.639	34.7334	34.5898	34.7388	34.7884	34.5179	34.731	34.7921	34.7699	34.733	34.3556	34.4373	34.1073	34.1199	+	Colony A-3/WT	+	Colony B-3/WT	+	Colony C-3/WT	24	24	24	66.9	66.9	66.9	40.439	510580000000	834	2.71665	0.00127907	0.47459	5.24978	2.078	0.00564045	0.403735	3.86064	2.98557	0.00132407	0.501489	5.92112	D0C907	META domain protein (Fragment)
27.8005	27.5973	27.8127	27.6861	28.0698	27.8627	27.8859	27.9766	27.9959	28.2382	28.0982	28.0732	28.2519	28.199	28.0179	28.103	+	Colony A-3/WT	+	Colony B-3/WT			7	7	7	49.2	49.2	49.2	29.011	5189700000	68	2.92331	0.000633987	-0.418837	-5.76043	1.48863	0.0195706	-0.194199	-2.76908	0.231737	0.477242	-0.0415864	-0.574522	D0C908	Aromatic ring-opening dioxygenase, catalytic subunit LigB
26.4471	26.7081	26.4566	26.4342	26.5769	26.5952	26.7844	26.6831	26.5153	25.8216	26.6285	25.9593	26.8963	27.1825	27.1476	26.9504	+	Colony A-3/WT	+	Colony B-3/WT	+	Colony C-3/WT	7	7	7	52.2	52.2	52.2	18.063	2031800000	73	2.82256	0.000790047	-0.532743	-5.50726	2.38545	0.00375132	-0.38431	-4.49708	2.06234	0.00738824	-0.813047	-3.82963	D0C909	Ribosomal RNA large subunit methyltransferase H
32.3298	32.3394	32.2322	32.3548	32.583	32.5269	32.6414	32.5459	32.3061	32.4488	32.4916	32.4577	32.5304	32.8113	32.7766	32.6043	+	Colony A-3/WT			+	Colony C-3/WT	38	38	38	71.3	71.3	71.3	62.616	118590000000	677	2.61986	0.00148333	-0.36659	-5.02186	0.72016	0.113645	-0.106346	-1.47571	1.74252	0.013911	-0.254577	-3.222	D0C910	Endopeptidase La
31.6678	31.5407	31.6647	31.6817	31.6862	31.7137	31.7302	31.7302	31.5741	31.7648	31.813	31.9163	31.7863	31.7482	31.9024	31.747	+	Colony A-3/WT	+	Colony B-3/WT			16	16	16	78.8	78.8	78.8	28.472	68012000000	334	1.72715	0.00929464	-0.157249	-3.19392	1.10845	0.0436498	-0.0808849	-2.12353	0.135553	0.637368	-0.0288997	-0.358997	D0C911	ATP-dependent protease La (LON) domain protein
30.9831	30.8588	30.7371	30.7557	30.3437	30.3547	30.3284	30.2495	30.9858	31.2055	31.0261	31.3192	25.4619	26.3722	26.0813	26.358	+	Colony A-3/WT	+	Colony B-3/WT	+	Colony C-3/WT	86	86	86	65.9	65.9	65.9	230.22	27045000000	951	6.19541	0	4.76531	21.6287	5.97296	0	4.25073	19.8382	6.27858	0	5.06582	22.3379	D0C912	Hep/Hag repeat protein
26.7543	26.54	26.543	26.2069	26.6218	26.3846	26.1676	26.4225	26.7376	26.898	26.7295	26.8845	24.6216	24.5513	24.9388	24.445	+	Colony A-3/WT	+	Colony B-3/WT	+	Colony C-3/WT	6	6	6	32.8	32.8	32.8	29.053	1493600000	63	4.70504	0	1.87187	12.0607	4.78689	0	1.75997	12.4592	5.83367	0	2.17323	18.7915	D0C913	OmpA family protein
23.2744	23.0279	23.3038	23.7208	22.8914	24.8593	23.6794	24.2101	25.6425	24.436	23.4826	25.5937	24.5867	24.9939	24.576	24.3447	+	Colony A-3/WT					5	5	5	52.4	52.4	52.4	12.091	368890000	36	3.22203	0.000460317	-1.29359	-6.56243	0.813987	0.0895025	-0.715254	-1.63358	0.113477	0.681988	0.163419	0.305845	D0C915	Uncharacterized protein
27.3026	27.9394	27.4292	27.2074	25.904	25.9408	26.6861	25.5462	26.6259	26.2331	27.0629	26.6995	27.4163	27.3217	27.3755	27.5149			+	Colony B-3/WT	+	Colony C-3/WT	3	3	3	38.1	38.1	38.1	11.933	2610200000	80	0.141125	0.566082	0.0625467	0.372163	2.90522	0.000830054	-1.38783	-5.71436	2.29178	0.00420958	-0.75176	-4.29733	D0C916	Uncharacterized protein
24.4143	24.5337	24.4208	24.4079	24.74	24.3659	24.6144	24.3064	25.6386	25.2213	25.1743	25.1797	25.8347	26.5106	26.063	26.2125	+	Colony A-3/WT	+	Colony B-3/WT	+	Colony C-3/WT	3	3	3	20	20	20	15.277	811000000	16	4.65371	0	-1.711	-11.8169	4.09208	0	-1.64849	-9.42929	2.48396	0.00271012	-0.851704	-4.71313	D0C919	Uncharacterized protein
24.7809	25.8121	24.502	25.0969	24.7685	24.2076	24.6812	24.8019	26.3233	26.9959	26.4209	26.4492	27.7318	27.5869	27.5486	28.024	+	Colony A-3/WT	+	Colony B-3/WT	+	Colony C-3/WT	12	12	10	52.3	52.3	41.9	35.2	1944300000	78	3.93753	0	-2.67484	-8.85342	5.68556	0	-3.108	-17.7373	3.13058	0.000862338	-1.17545	-6.30836	D0C921	Uncharacterized protein
23.941	23.8888	23.8576	23.7457	24.1469	24.3448	22.872	24.4117	25.2362	24.8226	23.2108	24.858	26.2499	25.878	25.9857	26.0342	+	Colony A-3/WT	+	Colony B-3/WT	+	Colony C-3/WT	5	5	5	52.5	52.5	52.5	20.107	439670000	19	6.53346	0	-2.17868	-24.6563	2.88243	0.000934513	-2.0931	-5.65671	1.78151	0.0130211	-1.50503	-3.29365	D0CEA3;D0C922	Uncharacterized protein (Fragment);Uncharacterized protein (Fragment)
23.9024	24.7411	23.6598	23.0801	22.0771	23.3776	23.9082	23.3781	24.3605	24.4158	24.2981	24.2566	24.8925	25.2969	25.2834	25.7554	+	Colony A-3/WT	+	Colony B-3/WT	+	Colony C-3/WT	3	3	3	42.5	42.5	42.5	9.2496	367880000	30	2.03387	0.00464777	-1.46122	-3.77358	2.59186	0.00211028	-2.12181	-4.9572	2.78566	0.00197938	-0.974295	-5.41655	D0C927	Uncharacterized protein
27.8034	28.4329	28.388	28.2619	27.8989	27.5922	28.7813	27.7742	28.4588	27.7533	28.8225	28.416	28.6509	28.9553	27.3674	29.295							3	3	3	50.7	50.7	50.7	7.3164	6910700000	33	0.330809	0.306342	-0.345576	-0.776659	0.513644	0.192359	-0.555508	-1.11768	0.1658	0.579893	-0.204484	-0.429358	D0C928	Uncharacterized protein
31.2253	31.1513	31.1252	31.1769	31.6667	31.5383	31.4622	31.4849	31.51	31.5812	31.4482	31.4163	31.1905	31.3709	31.3667	31.3139	+	Colony A-3/WT	+	Colony B-3/WT	+	Colony C-3/WT	19	19	19	58.5	58.5	58.5	37.119	53649000000	360	1.61225	0.0123211	-0.140798	-2.98682	1.97669	0.00673797	0.22753	3.66222	1.73592	0.014194	0.17844	3.20993	D0C930	Uncharacterized protein
27.5399	27.992	27.6691	27.5483	27.5484	27.1269	28.3824	27.0008	28.1411	26.6702	28.0546	28.1231	27.6695	27.8484	27.94	27.3666							3	1	1	53.5	12.7	12.7	7.851	4265900000	24	0.0396072	0.847888	-0.0188103	-0.114159	0.22909	0.441466	-0.191516	-0.568883	0.0373261	0.878611	0.0410895	0.107834	D0C931	Uncharacterized protein
27.9307	27.8227	27.6017	27.8592	27.6214	27.9207	28.3484	27.7664	27.6854	27.4508	27.981	27.8788	28.023	27.6287	28.0346	28.1495							7	7	7	39.6	39.6	39.6	27.654	4697700000	128	0.536902	0.164714	-0.155335	-1.15907	0.0834168	0.71639	-0.0447311	-0.230656	0.610606	0.170595	-0.209955	-1.28818	D0C932	DNA-binding helix-turn-helix protein
24.8691	24.1598	23.6437	24.3392	23.763	24.0357	23.4761	23.8916	25.1773	23.7265	24.1096	24.4047	24.7225	24.7847	24.8594	24.8929	+	Colony A-3/WT	+	Colony B-3/WT			3	3	3	24.7	24.7	24.7	18.103	304580000	33	1.1529	0.0348982	-0.561917	-2.19772	3.74732	0.000195719	-1.02328	-8.1871	0.72628	0.12752	-0.460337	-1.48607	D0C942	Uncharacterized protein
29.6062	29.7645	29.6742	29.2893	29.5797	29.2956	29.9679	29.4412	29.6256	29.0253	29.999	29.7993	30.0638	29.8893	30.0609	30.1641	+	Colony A-3/WT	+	Colony B-3/WT			5	5	5	59.5	59.5	59.5	9.6913	17281000000	84	2.10093	0.00414346	-0.460944	-3.90629	1.64689	0.0141828	-0.473409	-3.04874	1.0258	0.0628634	-0.432203	-1.98604	D0C943	Uncharacterized protein
25.5736	25.7836	23.0507	25.8325	25.4809	25.8516	26.3882	22.1955	25.8841	23.4533	26.1508	24.1076	25.4735	26.2707	25.6714	25.1609							4	4	4	76.4	76.4	76.4	8.3564	1027300000	15	0.353385	0.286567	-0.584011	-0.820659	0.28355	0.372278	-0.665066	-0.682249	0.482605	0.240075	-0.745181	-1.06188	D0C944	Uncharacterized protein
25.428	25.4917	25.5409	25.2144	25.4887	25.4759	25.4446	25.4472	25.7469	25.0451	25.743	26.0283	25.6635	25.2087	25.3763	25.6086							4	4	4	23	23	23	20.847	937610000	39	0.134537	0.579223	-0.045536	-0.356586	0.000482989	0.997777	-0.000154018	-0.00145206	0.318673	0.372863	0.176569	0.752725	D0C945	Uncharacterized protein
23.2992	23.3883	22.1938	26.3978	24.2297	23.6446	26.0381	26.4888	26.41	26.0479	26.1594	23.9634	25.9592	25.9829	25.9853	25.9697	+	Colony A-3/WT					2	2	2	19.6	19.6	19.6	10.657	1130200000	30	1.2677	0.0276356	-2.15454	-2.39052	0.60004	0.153395	-0.874013	-1.26984	0.235158	0.47213	-0.329122	-0.581791	D0C948	Uncharacterized protein
28.5036	28.5685	28.6731	28.5877	29.614	29.6489	29.5907	29.3181	29.8751	29.3891	29.6821	29.6687	27.9973	28.2548	28.1157	28.0483	+	Colony A-3/WT	+	Colony B-3/WT	+	Colony C-3/WT	10	10	10	51.7	51.7	51.7	17.892	11090000000	167	3.4656	0.0003379	0.479211	7.27902	5.30403	0	1.43893	15.2779	4.99544	0	1.54974	13.531	D0C949	Uncharacterized protein
22.7975	23.9608	25.0089	25.392	24.2827	24.6449	25.3125	25.1378	22.9225	22.8938	25.0493	24.7279	25.0465	25.5589	25.4952	25.1822					+	Colony C-3/WT	5	5	5	23.1	23.1	23.1	33.583	594670000	15	0.87331	0.0670134	-1.03093	-1.7326	0.912437	0.0715984	-0.47624	-1.79772	1.28333	0.035415	-1.42235	-2.41693	D0C960	Coat protein
23.5891	24.0124	23.4278	23.7359	23.1032	25.4371	22.8986	23.6114	24.0953	23.7662	23.6184	23.5416	25.3182	25.3897	24.7429	25.6908	+	Colony A-3/WT	+	Colony B-3/WT	+	Colony C-3/WT	2	2	2	46.2	46.2	46.2	7.0428	294130000	34	3.31195	0.000488421	-1.59409	-6.82005	1.32793	0.0274669	-1.5228	-2.49259	3.22474	0.000531792	-1.53	-6.5701	D0C964	Uncharacterized protein
23.1947	24.3698	24.156	23.7783	22.8617	24.5874	24.8946	23.9881	22.4431	24.4224	22.3943	23.2806	25.0885	25.0306	25.5567	25.1288	+	Colony A-3/WT	+	Colony B-3/WT	+	Colony C-3/WT	4	4	4	42.3	42.3	42.3	10.865	195080000	19	2.46317	0.00186768	-1.32643	-4.66699	1.27818	0.0303318	-1.11818	-2.40823	2.25371	0.0044631	-2.06605	-4.21767	D0C965	Uncharacterized protein
24.8397	23.45	24.0524	25.06	25.4711	24.7876	24.6081	24.8837	23.8476	24.2228	24.2525	23.7898	25.5875	25.9288	25.6867	25.7276	+	Colony A-3/WT	+	Colony B-3/WT	+	Colony C-3/WT	5	5	5	35.3	35.3	35.3	19.093	547230000	28	1.97948	0.00563564	-1.38214	-3.66763	2.13468	0.00541395	-0.795043	-3.97396	4.70713	0	-1.70448	-12.0708	D0C970	SH3b domain-containing protein
28.0472	28.2615	28.0056	28.0269	28.3042	28.1445	28.1444	28.0127	28.0784	28.1309	28.1581	28.0774	28.4252	28.5629	28.4245	28.4336	+	Colony A-3/WT	+	Colony B-3/WT	+	Colony C-3/WT	21	21	21	47.1	47.1	47.1	55.091	5935100000	141	2.8221	0.000787597	-0.376248	-5.50612	2.39703	0.00373727	-0.310112	-4.52215	3.95305	0.000229665	-0.350336	-8.90983	D0C972	RNA polymerase sigma-54 factor
27.66	27.535	27.7928	28.0186	28.8358	28.7221	28.1494	28.2379	28.912	28.4235	28.547	28.6555	29.341	29.1346	29.0264	29.1399	+	Colony A-3/WT	+	Colony B-3/WT	+	Colony C-3/WT	6	6	6	60.7	60.7	60.7	13.47	8035300000	86	4.58678	0	-1.40888	-11.5059	1.98144	0.00670386	-0.674159	-3.67142	2.28324	0.00423739	-0.52596	-4.2794	D0C973	Ribosomal subunit interface protein
29.1739	29.6052	29.216	29.3107	29.5648	29.3629	29.2393	29.2026	29.1947	28.9383	29.575	29.8271	29.2694	29.747	29.7721	29.7053	+	Colony A-3/WT					5	5	5	59.6	59.6	59.6	9.8931	14264000000	136	0.994998	0.0497279	-0.297043	-1.93487	1.00376	0.05766	-0.281081	-1.94943	0.470866	0.247893	-0.239696	-1.04059	D0C974	BolA-like protein
31.3181	31.2808	31.2256	31.2349	31.568	31.645	31.3603	31.4386	31.3575	31.4229	31.4344	31.4485	31.4741	31.5545	31.7306	31.6296	+	Colony A-3/WT			+	Colony C-3/WT	19	19	19	61.5	61.5	61.5	44.664	57171000000	431	2.88483	0.000819355	-0.33234	-5.66278	0.515624	0.191566	-0.0942059	-1.12122	1.68392	0.0162213	-0.181376	-3.11542	D0C975	UDP-N-acetylglucosamine 1-carboxyvinyltransferase
30.3672	30.4291	30.3315	30.2637	30.2812	30.2037	30.2667	30.248	30.2163	30.2934	30.189	30.2042	30.5737	30.5556	30.5262	30.735	+	Colony A-3/WT	+	Colony B-3/WT	+	Colony C-3/WT	10	10	10	73.6	73.6	73.6	25.08	26502000000	229	2.2891	0.00280326	-0.249732	-4.2917	3.36951	0.000249423	-0.34772	-6.98914	3.41154	0.000466019	-0.371914	-7.11477	D0C976	ATP phosphoribosyltransferase
30.8956	30.785	30.8915	30.7899	31.0252	30.8413	30.8958	30.9294	30.8514	30.8222	30.7793	31.0299	31.2533	31.1732	31.2078	31.0557	+	Colony A-3/WT	+	Colony B-3/WT	+	Colony C-3/WT	21	21	21	55	55	55	46.652	39855000000	320	3.14964	0.000522727	-0.331954	-6.36069	2.32165	0.00373165	-0.249566	-4.36046	2.31497	0.00392716	-0.301778	-4.3463	D0C977	Histidinol dehydrogenase
30.2253	30.2294	30.1868	30.2738	30.6929	30.571	30.6268	30.5507	30.4836	30.5356	30.588	30.6174	30.8683	30.7245	30.6546	30.9253	+	Colony A-3/WT	+	Colony B-3/WT	+	Colony C-3/WT	18	18	18	74.2	74.2	74.2	40.496	30702000000	300	3.88766	0	-0.564365	-8.67432	1.3928	0.0233549	-0.182841	-2.60341	1.85259	0.0107176	-0.237057	-3.42592	D0C978	Histidinol-phosphate aminotransferase
28.1155	28.2491	28.0301	28.0198	27.9622	28.0524	27.6076	28.0217	28.2607	27.8794	27.8367	28.0178	28.1551	28.499	28.4865	28.5423	+	Colony A-3/WT	+	Colony B-3/WT	+	Colony C-3/WT	10	10	10	32.7	32.7	32.7	53.156	5434500000	72	1.649	0.0115174	-0.317119	-3.05254	2.01784	0.00653989	-0.509765	-3.7422	1.74534	0.0137255	-0.422098	-3.22716	D0C979	Chorismate binding enzyme
24.878	24.9725	24.678	24.558	24.8737	24.7842	24.9122	24.6509	25.285	24.9739	25.0202	25.2001	24.7758	25.1721	25.2888	25.1678	+	Colony A-3/WT	+	Colony B-3/WT			7	7	7	26.9	26.9	26.9	42.961	629750000	44	1.18611	0.0322238	-0.329504	-2.25329	1.24121	0.0324669	-0.295904	-2.34585	0.0487657	0.844586	0.0186639	0.139278	D0C982	Uncharacterized protein
26.7605	26.6741	26.5818	26.5273	27.0674	27.3965	27.2171	26.7009	26.2265	27.0407	27.4907	27.2015	26.9636	27.3276	27.5226	28.0236	+	Colony A-3/WT					11	11	11	43.7	43.7	43.7	47.699	3047000000	47	1.9602	0.00592955	-0.823408	-3.63041	0.657647	0.1327	-0.363863	-1.36924	0.642349	0.156654	-0.469494	-1.34297	D0C984	Uncharacterized protein
31.1282	31.0105	30.9428	30.9434	30.7576	30.6992	30.5909	30.6185	31.0765	31.1526	31.174	31.1395	31.3242	31.3161	31.139	31.2272	+	Colony A-3/WT	+	Colony B-3/WT	+	Colony C-3/WT	29	29	29	68.6	68.6	68.6	69.229	42144000000	576	2.13865	0.00382289	-0.245388	-3.98196	4.26792	0	-0.585085	-10.1249	1.27476	0.0360773	-0.115991	-2.40244	D0C985	Uncharacterized protein
27.3265	27.6339	27.1933	27.5565	26.974	27.2735	27.8271	27.4049	27.5045	26.9971	27.4416	26.8811	27.5429	27.4112	27.3487	27.381							9	9	9	67.6	67.6	67.6	21.426	3323000000	100	0.0203346	0.916885	0.00659752	0.0597999	0.10323	0.666802	-0.0511069	-0.280599	0.631949	0.160455	-0.214883	-1.32507	D0C986	Hydrolase, NUDIX family
26.032	26.0549	23.8885	25.8435	26.1727	24.5374	23.7594	24.7546	25.598	26.1073	25.9833	25.8061	26.1419	26.4049	26.3139	26.3776			+	Colony B-3/WT	+	Colony C-3/WT	3	3	3	24	24	24	23.689	1150700000	26	0.806174	0.0797379	-0.854849	-1.6205	1.60162	0.0159053	-1.50353	-2.96791	1.87765	0.0100141	-0.435879	-3.47306	D0C987	Hydrolase, NUDIX family
27.7589	27.7972	27.9217	28.0597	27.4389	27.5173	28.0109	27.622	28.1448	27.616	28.163	27.9524	27.7407	27.5916	27.8271	27.5483	+	Colony A-3/WT					7	7	7	73.3	73.3	73.3	19.239	4558000000	89	1.15916	0.0343534	0.207476	2.20818	0.0746337	0.742753	-0.0296388	-0.208006	1.06374	0.0586417	0.292149	2.0491	D0C988	Bacterial transferase hexapeptide repeat protein
29.2185	29.139	29.1728	28.9849	29.1811	29.2654	29.0595	29.0855	29.335	28.9707	29.2278	29.268	29.5794	29.4999	29.5642	29.4399	+	Colony A-3/WT	+	Colony B-3/WT	+	Colony C-3/WT	11	11	11	87.8	87.8	87.8	24.08	12701000000	127	3.21491	0.000455796	-0.39205	-6.54238	3.21718	0.000229299	-0.37298	-6.54877	2.01231	0.00839386	-0.320462	-3.7314	D0C989	Universal bacterial protein YeaZ
27.6474	27.5576	27.5809	27.482	27.7319	27.8183	27.5169	27.6232	27.7186	27.9387	27.6985	27.7183	27.7075	28.1142	27.8951	27.9694	+	Colony A-3/WT	+	Colony B-3/WT			12	12	12	31.9	31.9	31.9	54.756	4492100000	160	2.09071	0.00421735	-0.354559	-3.8859	1.23002	0.03351	-0.24896	-2.32701	0.734723	0.125168	-0.153014	-1.50034	D0C991	Peptidase C13 family
27.6342	27.7216	27.4107	27.3348	27.552	27.7765	27.5794	27.5747	27.1145	27.4229	27.7035	27.4114	27.6588	28.0027	27.747	27.6409					+	Colony C-3/WT	6	6	6	34.4	34.4	34.4	32.647	3893300000	77	0.984516	0.050798	-0.236993	-1.91747	0.698648	0.119647	-0.141671	-1.43921	1.26515	0.0365246	-0.349247	-2.38621	D0C992	S-formylglutathione hydrolase
29.5186	29.4577	30.192	29.821	28.3424	28.6682	29.3799	28.3838	29.4298	28.2874	29.2519	28.7894	29.0678	29.0055	28.851	28.734	+	Colony A-3/WT					5	5	5	83.3	83.3	83.3	10.639	11379000000	102	2.39486	0.00212225	0.83275	4.51745	0.383553	0.27622	-0.220978	-0.878486	0.0323624	0.892109	0.0250707	0.0939713	D0C993	Uncharacterized protein
29.6796	29.6375	29.7199	29.8378	29.1448	29.7359	29.8118	29.134	30.1002	29.4508	29.9272	30.0116	30.8362	30.8339	30.7184	30.8151	+	Colony A-3/WT	+	Colony B-3/WT	+	Colony C-3/WT	11	11	11	69.7	69.7	69.7	24.48	22100000000	179	6.12792	0	-1.08218	-21.0694	3.44969	0.000265356	-1.34426	-7.23036	3.12426	0.00085567	-0.92842	-6.29111	D0C994	Ribulose-phosphate 3-epimerase
30.7321	30.888	30.9077	31.0828	31.3258	31.4224	31.226	31.3573	31.0491	30.6214	31.07	30.73	31.2603	31.1647	31.1901	31.2818	+	Colony A-3/WT	+	Colony B-3/WT	+	Colony C-3/WT	12	12	12	80.2	80.2	80.2	30.637	43767000000	214	2.23463	0.00303167	-0.321558	-4.17807	1.15085	0.0396803	0.108632	2.19429	1.65404	0.0167595	-0.356602	-3.06158	D0C995	Cof-like hydrolase
28.4583	28.489	28.2788	28.0962	28.1419	28.2511	28.2307	28.1453	28.2443	28.2326	28.2823	28.0656	28.258	28.3047	28.2015	28.352							18	18	18	40.8	40.8	40.8	72.639	6179000000	257	0.213179	0.444983	0.0515246	0.534675	1.04743	0.051394	-0.0868058	-2.02198	0.594258	0.177134	-0.0728545	-1.25978	D0C997	Copper-resistance protein, CopA family
27.1803	27.5531	27.0317	26.9494	27.0939	27.1595	27.1474	27.1075	26.9821	26.8186	27.1853	27.0869	27.2492	27.4734	27.3836	27.295			+	Colony B-3/WT	+	Colony C-3/WT	6	6	6	27.2	27.2	27.2	31.239	2954600000	86	0.562421	0.152665	-0.17167	-1.2041	2.28797	0.00425468	-0.223204	-4.28932	1.93331	0.00906152	-0.332072	-3.57881	D0C998	Copper resistance protein B
26.013	25.5808	25.5798	25.9916	26.0548	25.6086	25.6746	25.7591	25.9549	26.1706	26.0197	25.7717	25.7149	25.775	24.8895	25.3663					+	Colony C-3/WT	5	5	5	22.1	22.1	22.1	36.334	1106800000	60	0.732658	0.0956851	0.354887	1.49685	0.731798	0.110772	0.337842	1.4954	1.31637	0.0328512	0.542783	2.47294	D0C999	Uncharacterized protein
27.2675	27.2883	27.2018	27.4409	27.6564	27.2367	27.236	27.4249	27.5539	26.9896	27.0432	27.1427	27.3024	27.6005	27.6217	27.3897							9	9	9	72.3	72.3	72.3	17.682	3239800000	134	0.982139	0.0510485	-0.178961	-1.91352	0.29684	0.35831	-0.090086	-0.709138	1.01816	0.0638663	-0.296243	-1.97334	D0C9A1	Methylated-DNA--protein-cysteine methyltransferase
31.5452	31.5432	31.3369	31.2305	31.5478	31.4557	31.3107	31.3946	31.3342	31.4453	31.3989	31.5815	31.673	31.699	31.8481	31.8292	+	Colony A-3/WT	+	Colony B-3/WT	+	Colony C-3/WT	19	19	19	64.5	64.5	64.5	43.355	58949000000	300	2.08135	0.00450155	-0.348324	-3.8673	2.61205	0.00199396	-0.335087	-5.00377	2.4719	0.00269165	-0.32234	-4.68633	D0C9A2	Arginine biosynthesis bifunctional protein ArgJ
30.6056	30.6036	30.3513	30.5509	30.4471	30.5103	30.5766	30.4238	30.8284	30.7066	30.7651	30.5723	30.9445	30.9281	30.8982	30.953	+	Colony A-3/WT	+	Colony B-3/WT	+	Colony C-3/WT	17	17	17	68.1	68.1	68.1	38.652	32884000000	281	3.22371	0.000462151	-0.403111	-6.56718	4.72075	0	-0.44149	-12.1363	2.0504	0.00754628	-0.212845	-3.80608	D0C9A3	Quinolinate synthase A
27.5057	27.2663	27.4647	27.6672	28.1464	28.2718	28.3928	28.0518	28.3146	27.7174	28.2599	27.7047	28.0402	27.8113	27.8227	27.5309	+	Colony A-3/WT	+	Colony B-3/WT			9	9	9	30.4	30.4	30.4	37.539	4955000000	143	1.30049	0.0255789	-0.325315	-2.44599	1.74964	0.0113157	0.414411	3.23504	0.451889	0.261814	0.197875	1.00594	D0C9A4	Adenosine deaminase
28.9131	28.9714	29.0085	28.9027	28.7447	28.9757	28.9096	28.8463	29.1736	29.1265	29.0595	29.1504	28.9554	28.969	28.9729	29.0045			+	Colony B-3/WT	+	Colony C-3/WT	15	15	15	58.9	58.9	58.9	44.776	10102000000	266	0.43868	0.218756	-0.0265288	-0.981648	1.10456	0.0441139	-0.106373	-2.11704	2.89456	0.00177384	0.152047	5.68735	D0C9A7	Acyl-CoA dehydrogenase, C-terminal domain protein
24.6552	24.6404	24.5304	25.8248	25.0864	24.9799	24.8172	24.6662	25.1877	24.6414	25.0406	24.9798	25.1201	25.0939	25.0082	25.434			+	Colony B-3/WT			5	5	5	41.3	41.3	41.3	23.91	579730000	31	0.336296	0.301585	-0.25133	-0.787414	1.10091	0.0447295	-0.27659	-2.11097	0.651553	0.153554	-0.201643	-1.35879	D0C9B0	Transcriptional regulator, TetR family
24.0493	23.8008	23.5988	23.0588	25.0724	24.5173	23.2424	23.8422	23.6959	24.0616	24.1848	23.5513	23.6589	24.1033	23.887	24.2901							5	5	5	22	22	22	34.181	205690000	31	0.69129	0.106407	-0.357923	-1.42669	0.168972	0.533532	0.183756	0.436584	0.220806	0.489334	-0.111437	-0.551139	D0C9B4	LysR substrate binding domain protein
22.9951	23.9299	24.8303	25.0217	24.6044	24.0454	25.1989	25.1187	25.0101	24.0358	23.9787	24.3067	24.5098	24.5098	24.2716	24.0843							3	3	3	15.5	15.5	15.5	34.506	241440000	4	0.116864	0.62217	-0.149673	-0.314106	0.670278	0.128397	0.397964	1.39085	0.0144853	0.950182	-0.0110741	-0.0428698	D0C9B7	LysR substrate binding domain protein
32.0911	31.9491	32.007	31.9802	32.3218	32.2429	32.1989	32.2665	32.1676	32.221	32.0543	32.052	31.8833	32.041	31.9318	31.9475			+	Colony B-3/WT	+	Colony C-3/WT	22	22	22	54.6	54.6	54.6	43.964	86588000000	372	0.585933	0.143009	0.0559311	1.24527	3.48584	0.000271357	0.306606	7.34132	1.74524	0.0137715	0.172795	3.22697	D0C9C0	Uncharacterized protein
32.2073	32.2642	32.1442	32.1962	33.0348	33.0195	33.0084	32.8145	32.7843	32.8425	32.655	32.6814	32.7125	32.7085	32.645	32.5499	+	Colony A-3/WT	+	Colony B-3/WT			30	30	30	65.4	65.4	65.4	39.116	130980000000	670	4.22818	0	-0.451024	-9.96376	2.5687	0.0020885	0.315324	4.90414	0.731592	0.125839	0.0867987	1.49505	D0C9C1	Methionine synthase, vitamin-B12 independent
26.6732	27.0166	27.0074	27.0202	26.7892	27.0563	26.9058	26.9331	26.5465	26.4453	26.6096	26.7866	26.9259	26.7317	26.5689	26.5132	+	Colony A-3/WT	+	Colony B-3/WT			4	4	4	31.9	31.9	31.9	17.832	2239500000	35	0.997087	0.0495501	0.244417	1.93834	1.14956	0.0395963	0.236169	2.19214	0.317355	0.374214	-0.0879245	-0.750115	D0C9C2	Flavin reductase-like protein
28.0157	27.9333	27.7423	27.6916	28.4586	28.4877	28.569	28.0483	28.0008	28.1081	28.0822	28.033	25.8714	26.3698	26.0067	26.1152	+	Colony A-3/WT	+	Colony B-3/WT	+	Colony C-3/WT	8	8	8	40.6	40.6	40.6	20.766	4435700000	102	4.97783	0	1.75494	13.4372	5.19348	0	2.30012	14.6288	5.74506	0	1.96525	18.1537	D0C9C4	Uncharacterized protein
26.0778	25.2527	25.9283	25.8441	26.5437	26.5464	26.636	25.9134	25.9531	26.5074	26.6991	25.7071	24.1202	24.937	24.8193	24.5268	+	Colony A-3/WT	+	Colony B-3/WT	+	Colony C-3/WT	4	4	4	25.7	25.7	25.7	21.4	1186800000	29	2.42316	0.00204489	1.17489	4.57905	3.48142	0.000270677	1.80906	7.32768	2.81125	0.00180672	1.61584	5.47933	D0C9C5	Uncharacterized protein
30.8402	30.9152	30.7588	30.634	30.6075	30.5343	30.6808	30.6197	30.595	29.7799	30.5861	30.8141	30.4917	30.3379	30.5055	30.4691	+	Colony A-3/WT	+	Colony B-3/WT			13	13	13	69.9	69.9	69.9	29.915	30524000000	253	2.47986	0.00181395	0.335994	4.70401	1.76767	0.0112863	0.159531	3.26815	0.0105496	0.962939	-0.00723457	-0.0313577	D0C9C6	Sel1 repeat protein
30.4725	30.4562	30.3081	30.425	30.484	30.3961	30.5473	30.6244	30.5321	30.6332	30.5249	30.6092	29.8358	29.6742	29.787	29.8167	+	Colony A-3/WT	+	Colony B-3/WT	+	Colony C-3/WT	11	11	11	61.1	61.1	61.1	27.196	26075000000	231	4.75419	0	0.637049	12.2986	4.72667	0	0.734543	12.1649	5.66503	0	0.796446	17.5957	D0C9C7	Uncharacterized protein
30.182	30.1314	30.1311	30.0603	30.3465	30.2128	30.3473	30.2302	30.3	29.9203	30.3053	30.4173	29.2155	29.3014	29.5491	29.2187	+	Colony A-3/WT	+	Colony B-3/WT	+	Colony C-3/WT	16	16	16	84.2	84.2	84.2	25.909	20767000000	225	4.17903	0	0.805029	9.76769	4.50299	0	0.963024	11.1272	3.31362	0.000440367	0.914533	6.82491	D0C9C8	Uncharacterized protein
24.4092	24.3335	24.3731	24.6719	24.5987	24.358	24.357	24.7729	24.3921	24.6017	22.1626	24.5898	23.8733	24.1056	25.2007	25.4811							4	4	4	23.8	23.8	23.8	24.566	339410000	27	0.215434	0.441749	-0.218231	-0.539556	0.131842	0.60454	-0.143517	-0.350174	0.459881	0.255946	-0.728604	-1.02057	D0C9C9	Uncharacterized protein
31.7921	31.9142	32.1107	32.023	31.9374	32.0444	32.141	31.9321	32.0533	31.8934	32.053	32.043	32.8181	32.5906	32.5884	32.5244	+	Colony A-3/WT	+	Colony B-3/WT	+	Colony C-3/WT	19	19	19	65.1	65.1	65.1	48.826	94918000000	544	3.40881	0.00032816	-0.67039	-7.10654	3.56206	0.000167979	-0.616671	-7.57992	3.75686	0.000197531	-0.619707	-8.21945	D0C9D3	Ribonucleoside-diphosphate reductase subunit beta
34.1343	34.0869	34.1766	34.1954	34.3034	34.276	34.2303	34.2931	34.3546	34.2427	34.2637	34.2591	34.6038	34.5341	34.5613	34.5036	+	Colony A-3/WT	+	Colony B-3/WT	+	Colony C-3/WT	58	58	58	66.5	66.5	66.5	105.24	413190000000	1338	4.79762	0	-0.402436	-12.5123	4.31017	0	-0.274999	-10.2987	3.74968	0.000196721	-0.270709	-8.1951	D0C9D5	Vitamin B12-dependent ribonucleotide reductase
33.9279	33.8445	34.0645	34.1986	34.3374	34.1845	34.2457	34.483	34.2148	33.8446	34.006	34.1647	34.0878	33.7169	34.0055	33.8858			+	Colony B-3/WT			16	16	16	71.8	71.8	71.8	27.136	349790000000	568	0.321278	0.315384	0.0848732	0.757881	2.02587	0.00634286	0.38866	3.75791	0.531278	0.211816	0.133528	1.14909	D0C9D6	Transcriptional regulatory protein RstA
28.5377	28.3675	28.3148	28.5647	28.5969	28.7445	28.4475	28.2596	28.6388	29.0239	28.4119	28.4573	28.6497	28.829	28.6956	28.7597	+	Colony A-3/WT					19	19	19	43.4	43.4	43.4	62.443	7917200000	210	2.11261	0.00386441	-0.287333	-3.92964	1.03251	0.0533198	-0.221366	-1.99719	0.289944	0.403406	-0.100516	-0.695222	D0C9D7	ATPase/histidine kinase/DNA gyrase B/HSP90 domain protein
31.2461	31.3429	31.4498	31.5673	31.3899	31.5013	31.4268	31.2679	31.7691	31.6024	31.3614	31.0301	31.7378	31.523	31.6278	31.4644	+	Colony A-3/WT	+	Colony B-3/WT			12	12	12	94.9	94.9	94.9	13.554	58046000000	253	1.05559	0.0433852	-0.186708	-2.03555	1.31786	0.0282239	-0.191781	-2.47547	0.374223	0.318678	-0.147506	-0.860715	D0C9D8	Uncharacterized protein
30.6752	30.6298	30.5436	30.6005	30.6278	30.6647	30.626	30.4426	30.6089	30.7678	30.5567	30.8422	31.1095	31.0721	30.9507	31.1341	+	Colony A-3/WT	+	Colony B-3/WT	+	Colony C-3/WT	5	5	5	33.9	33.9	33.9	19.98	34575000000	107	4.0438	0	-0.454357	-9.24596	3.50108	0.000274809	-0.476351	-7.38851	2.50832	0.00265043	-0.372725	-4.76753	D0C9E0	NADH-quinone oxidoreductase subunit A
31.8762	31.7901	31.8223	31.9163	31.7135	31.8619	32.0273	31.8957	31.8969	31.9218	31.891	31.6625	32.1354	31.9836	32.0087	31.9488	+	Colony A-3/WT			+	Colony C-3/WT	10	10	10	55.1	55.1	55.1	25.551	76709000000	239	1.83821	0.00767837	-0.167902	-3.39898	0.971753	0.0615539	-0.144558	-1.89627	1.28194	0.0355038	-0.176104	-2.41458	D0C9E1	NADH-quinone oxidoreductase subunit B
33.3883	33.2882	33.2318	33.2608	33.2236	33.2651	33.1034	33.1737	33.1367	33.4097	33.2035	33.1438	33.5557	33.5942	33.605	33.4857	+	Colony A-3/WT	+	Colony B-3/WT	+	Colony C-3/WT	46	46	46	81.2	81.2	81.2	68.579	207360000000	860	3.07918	0.000497297	-0.267884	-6.16896	3.80124	0.000201893	-0.368703	-8.37142	2.54758	0.00267838	-0.336714	-4.85606	D0C9E2	NADH-quinone oxidoreductase subunit C/D
30.4303	30.569	30.6235	30.6495	30.3361	30.0477	30.2952	30.67	30.1262	29.9446	30.233	29.9514	30.506	30.7311	30.3711	30.7421					+	Colony C-3/WT	11	11	11	91.7	91.7	91.7	18.929	26703000000	123	0.0675715	0.755313	-0.0194745	-0.189551	0.792972	0.0945215	-0.250334	-1.59838	2.42096	0.00309211	-0.523753	-4.57423	D0C9E3	NADH dehydrogenase subunit E
33.3739	33.315	33.2214	33.3523	33.335	33.3111	33.2862	33.4203	33.2352	33.4351	33.2263	33.3052	33.7144	33.5804	33.8635	33.6197	+	Colony A-3/WT	+	Colony B-3/WT	+	Colony C-3/WT	33	33	33	75.8	75.8	75.8	48.621	221330000000	833	2.73983	0.00118101	-0.378832	-5.30538	2.66879	0.00188854	-0.356343	-5.13621	2.59636	0.00243066	-0.394005	-4.96755	D0C9E4	NADH-quinone oxidoreductase subunit F
33.4588	33.3748	33.3648	33.5154	33.4903	33.5147	33.5436	33.3486	33.5028	33.6782	33.523	33.5842	33.7916	33.8687	33.8664	33.8972	+	Colony A-3/WT	+	Colony B-3/WT	+	Colony C-3/WT	49	49	49	64.9	64.9	64.9	97.987	250270000000	1182	4.26052	0	-0.427525	-10.0947	3.636	0.000175342	-0.381632	-7.8175	3.11091	0.000984615	-0.283897	-6.25475	D0C9E5	NADH-quinone oxidoreductase
29.3376	29.2325	29.2188	29.5024	29.3633	29.7217	29.055	29.1381	29.2823	29.6979	29.2006	28.817	29.9176	30.212	30.2949	29.9943	+	Colony A-3/WT	+	Colony B-3/WT	+	Colony C-3/WT	6	6	6	13.9	13.9	13.9	37.712	15272000000	87	3.3997	0.000325275	-0.781847	-7.07918	2.39797	0.00374228	-0.78519	-4.52419	2.26799	0.0044269	-0.855239	-4.24746	D0C9E6	NADH-quinone oxidoreductase subunit H
31.039	31.0467	30.9544	30.9593	31.063	30.7811	30.7992	30.9388	30.8072	30.6842	31.2184	31.0865	31.0499	31.4007	31.3692	31.2166	+	Colony A-3/WT	+	Colony B-3/WT			13	13	13	65	65	65	20.431	43364000000	323	1.66272	0.0114662	-0.259221	-3.07719	1.88829	0.00847609	-0.363574	-3.49317	1.09947	0.0539083	-0.310014	-2.10856	D0C9E7	NADH-quinone oxidoreductase subunit I
28.405	28.1305	28.4324	28.1471	28.2407	28.3803	27.5716	28.1921	27.4675	28.3908	28.0334	27.9591	28.5125	29.0888	28.8771	28.8216	+	Colony A-3/WT	+	Colony B-3/WT	+	Colony C-3/WT	5	5	5	7.8	7.8	7.8	67.89	6518600000	108	2.04414	0.00462322	-0.546294	-3.79374	1.83137	0.00975397	-0.728861	-3.38621	2.07023	0.0069	-0.862323	-3.84524	D0C9F0	NDH-1 subunit L
26.4613	25.715	25.5778	25.7857	25.8356	26.2485	23.9075	26.3464	25.99	27.1643	25.1975	25.9173	26.8769	27.3939	26.4286	26.9004	+	Colony A-3/WT	+	Colony B-3/WT			5	5	5	11.8	11.8	11.8	58.879	1620300000	25	1.96638	0.00573451	-1.015	-3.64233	1.14316	0.0400225	-1.31541	-2.18144	0.938409	0.0770827	-0.832672	-1.84088	D0C9F1	NADH dehydrogenase subunit M
28.1597	28.2275	27.8783	28.2049	28.1227	28.7208	27.9426	28.0135	28.1355	29.0498	27.8554	27.5981	29.0648	29.5403	29.4007	29.2539	+	Colony A-3/WT	+	Colony B-3/WT	+	Colony C-3/WT	4	4	4	11	11	11	53.941	7787400000	73	4.03204	0	-1.19732	-9.20176	2.79848	0.00135135	-1.11501	-5.44795	1.87933	0.00998122	-1.15523	-3.47625	D0C9F2	NADH-quinone oxidoreductase subunit N
31.8316	31.8281	31.7256	31.7106	32.0027	31.8848	32.0268	31.9974	31.8022	31.6264	31.8348	31.9331	32.3823	32.3758	32.4552	32.1738	+	Colony A-3/WT	+	Colony B-3/WT	+	Colony C-3/WT	15	15	15	85.3	85.3	85.3	22.832	82660000000	363	3.7965	0.000126437	-0.572793	-8.35508	2.78177	0.00131796	-0.368841	-5.40706	3.10005	0.000982097	-0.547645	-6.22527	D0C9F3	Uracil phosphoribosyltransferase
27.0298	26.8519	26.8566	27.0619	27.4272	27.3987	26.7214	27.5366	26.8105	27.5012	26.9275	27.8733	27.7753	27.7617	28.1709	27.5617	+	Colony A-3/WT	+	Colony B-3/WT			4	4	4	29.9	29.9	29.9	11.168	3358900000	35	3.10242	0.000510166	-0.867349	-6.23169	1.289	0.0296758	-0.546418	-2.42653	0.989661	0.0677993	-0.539267	-1.92601	D0C9F4	Cold-shock DNA-binding domain protein
29.9098	29.8032	29.8433	29.7472	29.8293	29.919	29.8857	29.7713	30.0465	29.6223	29.6363	29.5746	30.1361	30.2593	30.2532	30.0679	+	Colony A-3/WT	+	Colony B-3/WT	+	Colony C-3/WT	18	18	18	68.5	68.5	68.5	32.928	19497000000	298	3.05495	0.000488496	-0.353259	-6.10408	2.92583	0.000837545	-0.327839	-5.76687	2.07444	0.00685112	-0.459207	-3.85359	D0C9F5	LysR substrate binding domain protein
28.891	29.0473	28.8771	28.9138	29.5567	29.3891	29.449	29.1959	29.1489	29.2185	29.3513	29.3869	29.6514	29.7825	29.9164	29.545	+	Colony A-3/WT	+	Colony B-3/WT	+	Colony C-3/WT	14	14	14	56.5	56.5	56.5	28.575	13386000000	197	3.93562	0	-0.791516	-8.84652	1.59304	0.0162889	-0.326169	-2.95265	2.4177	0.00308197	-0.447452	-4.56712	D0C9F6	Ferredoxin--NADP(+) reductase
25.5526	25.3849	25.206	25.0644	24.9265	25.5153	25.3713	25.0582	24.545	24.3475	24.9577	24.5077	26.1131	25.9184	26.1533	25.4447	+	Colony A-3/WT	+	Colony B-3/WT	+	Colony C-3/WT	3	3	3	35	35	35	16.738	833600000	32	1.68554	0.0108566	-0.605384	-3.11835	1.75904	0.0113093	-0.689538	-3.25228	3.13939	0.000740741	-1.31792	-6.3325	D0C9F7	Uncharacterized protein
30.0452	29.8018	29.5778	29.938	31.3101	31.478	30.8042	30.7705	31.2674	31.7139	30.3978	30.5309	30.1552	30.8596	30.2284	30.2569	+	Colony A-3/WT	+	Colony B-3/WT			9	9	9	24	24	24	59.141	33726000000	164	1.4999	0.0161408	-0.53429	-2.78874	1.59743	0.0160769	0.715697	2.96046	0.863016	0.0905741	0.602516	1.71545	D0C9F9	Conserved TM helix
26.1228	26.0975	25.7131	26.0978	25.704	26.1715	26.0383	25.586	26.0129	25.6482	26.0983	26.0181	26.0938	26.0575	25.9039	26.1567							5	5	5	15.7	15.7	15.7	46.46	1307600000	46	0.15416	0.539212	-0.045146	-0.402597	0.562711	0.168425	-0.178007	-1.20461	0.422608	0.281699	-0.108607	-0.951877	D0C9G1	Flavoprotein family protein
28.6684	28.694	28.6713	28.6033	28.9025	28.8617	28.6871	28.8144	28.8047	28.971	28.7221	29.2821	29.069	29.1891	28.9301	29.0348	+	Colony A-3/WT	+	Colony B-3/WT			16	16	16	64.5	64.5	64.5	40.669	9428500000	185	3.36543	0.0005	-0.39651	-6.97704	1.82491	0.00998621	-0.239321	-3.37416	0.354077	0.338743	-0.110758	-0.821997	D0C9G3	Auxiliary transport protein, membrane fusion protein (MFP) family protein
24.1465	24.3775	24.4916	24.7285	24.5369	24.1584	23.7828	24.5405	24.4797	23.6544	24.4659	24.5387	24.3572	25.3646	24.8594	24.9321			+	Colony B-3/WT			3	3	3	25.9	25.9	25.9	21.726	395120000	22	0.942835	0.056005	-0.442276	-1.84824	1.19693	0.0362327	-0.623661	-2.27143	1.04185	0.0604727	-0.593659	-2.01271	D0C9G5	Transcriptional regulator, TetR family
32.6529	32.4752	32.554	32.5954	32.6758	32.6569	32.6007	32.6355	32.4731	32.6719	32.5283	32.6231	32.5576	32.7489	32.7928	32.7096	+	Colony A-3/WT					50	50	50	85	85	85	76.493	126180000000	846	1.09296	0.0401584	-0.132846	-2.09773	0.514919	0.191824	-0.0600243	-1.11996	0.962901	0.0725552	-0.12811	-1.88157	D0C9G8	Methionine--tRNA ligase
31.8907	31.9105	31.9251	32.0287	32.0527	32.2129	32.3302	31.9269	32.7211	32.2921	32.3297	32.3054	31.5056	31.5912	31.4087	31.3525	+	Colony A-3/WT	+	Colony B-3/WT	+	Colony C-3/WT	10	10	10	40.9	40.9	40.9	18.841	83726000000	191	3.61962	0.000381443	0.474244	7.76434	3.18602	0.000225941	0.666185	6.46147	3.74224	0.000195122	0.947587	8.16993	D0C9G9	Uncharacterized protein
29.4039	29.441	29.3366	29.3962	29.651	29.5602	29.468	29.3864	29.6957	29.6447	29.745	29.6558	29.8908	29.9813	30.0875	29.9144	+	Colony A-3/WT	+	Colony B-3/WT	+	Colony C-3/WT	23	23	23	74.8	74.8	74.8	44.445	16573000000	321	4.62802	0	-0.574073	-11.6967	3.11307	0.000617822	-0.452104	-6.26062	2.90484	0.00178571	-0.283204	-5.7134	D0C9H0	Iron-sulfur cluster carrier protein
29.1798	29.2516	28.9251	29.1557	28.8856	29.1703	29.0278	28.8593	29.0941	29.3041	29.1247	29.0875	28.354	28.4569	28.499	28.5231	+	Colony A-3/WT	+	Colony B-3/WT	+	Colony C-3/WT	13	13	13	68.6	68.6	68.6	31.749	9844200000	199	3.80436	0.000127907	0.669771	8.38221	3.20671	0.00022833	0.527516	6.51932	4.46559	0	0.694307	10.9619	D0C9H1	MTA/SAH nucleosidase
29.7959	29.8597	29.667	29.6469	30.0165	29.9973	30.2058	30.2379	30.1912	30.3033	30.0238	30.0377	30.7045	30.6589	30.3613	30.5735	+	Colony A-3/WT	+	Colony B-3/WT	+	Colony C-3/WT	9	9	9	57.7	57.7	57.7	21.442	23463000000	150	3.99792	0	-0.832133	-9.07465	2.46582	0.00288858	-0.460181	-4.67286	2.29615	0.00415015	-0.435524	-4.30653	D0C9H4	dCTP deaminase
24.6929	24.7052	24.632	24.8242	24.6418	24.6214	23.0357	24.9527	25.3153	25.5797	24.5454	23.4428	23.9867	23.1098	24.1695	24.2777	+	Colony A-3/WT					7	7	7	17.2	17.2	17.2	75.946	270990000	37	1.66485	0.0114315	0.827623	3.08103	0.364128	0.29252	0.426976	0.841374	0.748662	0.120198	0.834871	1.52387	D0C9H6	Uncharacterized protein
27.9798	27.7595	27.7723	27.7545	27.6424	27.4328	27.672	27.7327	27.4663	27.2892	27.6112	27.7961	28.0802	27.9999	28.1629	28.0598	+	Colony A-3/WT	+	Colony B-3/WT	+	Colony C-3/WT	11	11	11	50.3	50.3	50.3	34.922	4378000000	151	2.16863	0.00360396	-0.259188	-4.04267	3.09498	0.000614173	-0.455714	-6.21157	2.49811	0.00263668	-0.535015	-4.74469	D0C9I0	tRNA-dihydrouridine(16) synthase
32.7429	32.7044	32.6712	32.8084	32.8337	32.9071	32.8263	32.7842	32.8016	32.7103	32.7066	32.8455	32.9913	33.0064	33.0939	33.1097	+	Colony A-3/WT	+	Colony B-3/WT	+	Colony C-3/WT	37	37	37	80	80	80	51.196	148330000000	825	3.55938	0.000360976	-0.31859	-7.57141	2.77376	0.00130719	-0.212466	-5.38752	3.0988	0.000977099	-0.284295	-6.22189	D0C9I2	Signal recognition particle protein
26.6741	26.7119	26.4178	26.3039	27.0841	26.8867	26.8315	26.7425	26.8799	26.7174	26.8548	27.2652	27.5876	27.5867	27.6072	27.5362	+	Colony A-3/WT	+	Colony B-3/WT	+	Colony C-3/WT	8	8	8	43.9	43.9	43.9	27.389	2704200000	97	4.3614	0	-1.0525	-10.5132	4.07925	0	-0.693233	-9.38028	2.81428	0.00181053	-0.650088	-5.48681	D0C9I3	Type III pantothenate kinase
27.8865	27.7706	27.9196	27.6831	28.0871	27.8075	27.8342	28.061	27.8199	27.7493	28.0408	28.2429	28.483	28.1867	28.1013	28.5007	+	Colony A-3/WT	+	Colony B-3/WT	+	Colony C-3/WT	10	10	10	68	68	68	27.953	5257500000	162	2.3181	0.00256738	-0.502982	-4.35292	1.59005	0.0163261	-0.370475	-2.94735	1.23868	0.0386667	-0.354711	-2.34158	D0C9I4	Biotin--[acetyl-CoA-carboxylase] ligase
25.815	26.1855	25.7804	25.9312	26.3872	26.0671	26.4113	25.8433	26.6132	26.4241	26.4439	26.0057	26.1513	26.2747	26.4818	25.8514							11	11	11	39	39	39	27.1	1544700000	84	0.812099	0.0784621	-0.261776	-1.63042	0.0225857	0.912794	-0.012558	-0.0662597	0.440996	0.268967	0.18195	0.985918	D0C9I6	Transcriptional regulator, GntR family
28.3625	28.4612	28.4741	28.4923	28.6359	28.6882	28.6119	28.4428	28.8034	28.8129	28.7166	28.9286	29.345	29.4326	29.426	29.4039	+	Colony A-3/WT	+	Colony B-3/WT	+	Colony C-3/WT	42	42	42	51.6	51.6	51.6	132.17	9654800000	415	6.77656	0	-0.954344	-27.0872	5.12435	0	-0.807191	-14.2363	4.74574	0	-0.586488	-12.2574	D0C9I7	Chromosome partition protein Smc
30.4632	30.5831	30.4116	30.5576	30.2441	30.9186	30.4332	30.2685	30.2937	30.989	30.3225	30.0366	31.1523	31.1248	30.8562	30.9506	+	Colony A-3/WT	+	Colony B-3/WT	+	Colony C-3/WT	15	15	15	75.9	75.9	75.9	38.114	32138000000	361	3.1478	0.000520755	-0.51713	-6.35561	1.74648	0.0113785	-0.554868	-3.22925	1.5271	0.0220559	-0.610533	-2.83633	D0C9I8	Cell division protein ZipA
28.9209	28.787	28.9056	28.9942	29.2367	29.0237	28.9977	29.0195	29.1182	29.2789	29.2492	29.3189	29.6595	30.0354	29.9271	29.7894	+	Colony A-3/WT	+	Colony B-3/WT	+	Colony C-3/WT	23	23	23	47.3	47.3	47.3	77.016	12979000000	283	4.30974	0	-0.9509	-10.2969	3.66188	0.000178771	-0.783416	-7.90215	3.23688	0.000534884	-0.611545	-6.60445	D0C9I9	DNA ligase
29.1722	29.0164	29.61	29.3377	28.7521	28.942	29.0188	28.7316	29.1191	28.784	29.4574	29.3301	29.9467	30.2485	30.0268	30.1426	+	Colony A-3/WT	+	Colony B-3/WT	+	Colony C-3/WT	11	11	11	83.8	83.8	83.8	18.034	14093000000	203	2.87595	0.000815409	-0.807084	-5.6404	4.83638	0	-1.23006	-12.706	2.89752	0.00177778	-0.918553	-5.69485	D0C9J0	Bacterioferritin
30.4076	30.4321	30.9869	31.1405	31.812	31.9163	31.6849	31.6704	32.2411	32.1382	31.9224	31.8342	28.6138	28.7725	28.7366	28.5018	+	Colony A-3/WT	+	Colony B-3/WT	+	Colony C-3/WT	25	25	25	56.7	56.7	56.7	54.913	49611000000	387	4.36143	0	2.08557	10.5133	7.57043	0	3.11473	36.7944	7.04409	0	3.37781	30.0358	D0C9J2	Putative alpha,alpha-trehalose-phosphate synthase (UDP-forming)
27.1642	27.2336	27.4205	27.5961	28.7044	28.6448	28.6018	28.4403	28.9544	28.2876	28.3879	28.3959	24.9271	24.876	25.6447	25.7014	+	Colony A-3/WT	+	Colony B-3/WT	+	Colony C-3/WT	12	12	12	39.2	39.2	39.2	32.304	4920600000	171	3.83392	0	2.06632	8.48486	5.1488	0	3.3105	14.3739	4.67873	0	3.21914	11.9352	D0C9J3	Trehalose 6-phosphate phosphatase
27.0174	27.1151	27.2201	26.846	27.3257	27.2644	27.5935	27.9688	26.724	26.8657	27.0997	26.5331	26.8467	26.8726	27.0975	27.0217			+	Colony B-3/WT			7	7	7	48.4	48.4	48.4	28.193	2824200000	97	0.3971	0.247357	0.0900426	0.90412	1.82727	0.00978042	0.57847	3.37855	0.53318	0.210636	-0.153966	-1.15247	D0C9J4	Uncharacterized protein
28.3196	28.3631	28.2218	28.2073	29.0463	28.801	28.9018	28.8872	28.6706	28.4986	28.7189	28.5794	28.6429	28.4811	28.5497	28.3599	+	Colony A-3/WT	+	Colony B-3/WT			12	12	12	41.8	41.8	41.8	47.807	7779100000	225	1.76664	0.00841108	-0.230442	-3.26625	2.65947	0.00188272	0.400682	5.1143	0.680306	0.143158	0.108519	1.40798	D0C9J5	Adenosylmethionine-8-amino-7-oxononanoate aminotransferase
28.3431	28.4113	28.4758	28.3431	29.1722	28.8199	28.8796	28.7989	28.8789	28.7092	28.9504	28.5703	28.6483	28.74	28.2961	28.3698			+	Colony B-3/WT			16	16	16	63.9	63.9	63.9	43.347	8173300000	131	0.490956	0.188291	-0.120229	-1.07696	1.58396	0.016503	0.404118	2.93655	0.988761	0.0678567	0.263614	1.92452	D0C9J6	8-amino-7-oxononanoate synthase
24.5866	24.8307	23.4355	24.5375	24.8051	24.7505	24.9432	24.8562	25.0556	24.3951	24.3448	23.344	24.7373	25.1603	24.8509	24.9122							4	4	4	22.5	22.5	22.5	28.777	520860000	10	0.887129	0.0648797	-0.567608	-1.75562	0.331092	0.322742	-0.0764313	-0.777215	0.872385	0.0885139	-0.630308	-1.73106	D0C9J7	Malonyl-[acyl-carrier protein] O-methyltransferase
30.1679	29.9585	29.7651	29.7666	30.6345	30.5656	30.2334	30.295	30.1682	30.3424	29.9864	30.3345	30.2912	30.444	30.3595	30.4819	+	Colony A-3/WT					13	13	13	63.8	63.8	63.8	24.611	24674000000	226	2.41763	0.00203474	-0.479628	-4.56697	0.132918	0.603592	0.0379686	0.352736	1.01927	0.0636538	-0.18628	-1.97519	D0C9J8	ATP-dependent dethiobiotin synthetase BioD
30.0097	29.9541	30.1734	30.0761	30.5169	30.3231	30.4667	30.2234	30.5308	30.5392	30.4695	30.6845	30.9001	31.1182	30.9699	30.9299	+	Colony A-3/WT	+	Colony B-3/WT	+	Colony C-3/WT	19	19	19	56.4	56.4	56.4	35.464	30487000000	309	5.02845	0	-0.926207	-13.7083	3.44581	0.000264059	-0.596984	-7.21854	3.1539	0.00075067	-0.423536	-6.37242	D0C9J9	Pseudouridine synthase
26.4473	26.29	26.1274	26.2102	26.1525	26.0018	26.387	26.0897	26.3426	26.2985	26.3812	26.1232	27.1001	27.2587	27.1753	26.8691	+	Colony A-3/WT	+	Colony B-3/WT	+	Colony C-3/WT	7	7	7	42.4	42.4	42.4	22.41	1933200000	79	3.60164	0.000375635	-0.832081	-7.70635	3.69939	0.000184971	-0.943075	-8.02618	3.70425	0.000190476	-0.814451	-8.04238	D0C9K0	Segregation and condensation protein B
25.9824	25.6121	25.2423	25.1911	25.089	25.6151	25.3263	24.447	25.0882	24.5012	24.9542	25.2269	26.1067	26.2447	26.5216	26.3688	+	Colony A-3/WT	+	Colony B-3/WT	+	Colony C-3/WT	3	3	3	14.8	14.8	14.8	29.706	1045800000	47	2.11451	0.0038685	-0.803467	-3.93345	2.39339	0.00371238	-1.19112	-4.51426	3.56202	0.000376812	-1.36781	-7.57977	D0C9K1	Segregation and condensation protein A
29.4516	29.478	29.3434	29.3212	29.9385	29.8962	30.0373	29.7135	29.7955	29.4292	29.7385	29.5607	29.8528	29.7908	29.7606	29.7375	+	Colony A-3/WT					11	11	11	62.9	62.9	62.9	22.59	16591000000	189	3.80084	0.000126801	-0.386885	-8.37004	0.756315	0.102957	0.11096	1.53677	0.893563	0.0840519	-0.154441	-1.76632	D0C9K2	Sua5/YciO/YrdC/YwlC family protein
24.3756	24.7682	24.5699	23.6955	23.0613	23.4186	24.4086	23.6875	24.2264	22.0014	23.4327	24.1413	25.2889	24.986	24.8609	23.8861			+	Colony B-3/WT	+	Colony C-3/WT	5	5	5	28.6	28.6	28.6	25.341	291840000	15	0.478077	0.195413	-0.403164	-1.05368	1.43073	0.0213484	-1.11147	-2.6687	1.14476	0.0488502	-1.30499	-2.18412	D0C9K3	Uncharacterized protein
29.4427	29.3234	29.2004	29.3021	29.1215	29.1418	29.3699	29.0962	29.1574	29.1618	29.4482	29.4308	29.5277	29.532	29.5635	29.3391	+	Colony A-3/WT	+	Colony B-3/WT			9	9	9	57	57	57	20.945	13008000000	184	1.29196	0.0260728	-0.173403	-2.43155	2.0427	0.00604435	-0.308189	-3.79091	1.03211	0.0621043	-0.191029	-1.99652	D0C9K4	Putative ACR, COG1399
27.3619	28.1672	28.37	28.503	27.2695	27.8886	27.5501	27.5109	27.8602	28.4368	27.7356	27.8619	27.6621	27.6931	27.5107	26.6771	+	Colony A-3/WT					2	2	2	36.1	36.1	36.1	7.0798	4513400000	62	1.05824	0.043002	0.714783	2.03995	0.254729	0.405906	0.169015	0.622931	1.0654	0.0585815	0.587913	2.05187	D0C9K5	50S ribosomal protein L32
32.4999	32.5739	32.3671	32.4208	32.4998	32.5438	32.4346	32.5018	32.4229	32.3893	32.521	32.6108	32.7605	32.88	32.9249	33.0086	+	Colony A-3/WT	+	Colony B-3/WT	+	Colony C-3/WT	14	14	14	63.4	63.4	63.4	34.405	124310000000	396	3.10105	0.000508287	-0.428124	-6.228	3.39455	0.000254717	-0.398517	-7.06378	2.88368	0.00175439	-0.407536	-5.65988	D0C9K6	Malonyl CoA-acyl carrier protein transacylase
33.2969	33.4205	33.5967	33.4255	33.4149	33.6161	33.4458	33.5884	33.6543	33.2695	33.5563	33.4008	33.9839	33.7318	33.888	33.8581	+	Colony A-3/WT	+	Colony B-3/WT	+	Colony C-3/WT	15	15	15	86.5	86.5	86.5	26.098	248830000000	527	2.75469	0.00111111	-0.43053	-5.34126	2.53308	0.00233286	-0.349154	-4.82324	2.13346	0.00611924	-0.39525	-3.97152	D0C9K7	3-oxoacyl-[acyl-carrier-protein] reductase
32.5814	32.8865	33.4447	32.8275	32.2791	32.4946	33.2252	32.4672	32.5559	31.6498	33.3916	33.4996	32.7399	30.898	32.1455	32.9771							2	2	2	16.5	16.5	16.5	10.132	140290000000	53	0.729633	0.0963764	0.744871	1.49174	0.361799	0.294686	0.426375	0.836895	0.406815	0.292549	0.58413	0.922386	D0C9K8	Acyl carrier protein
32.9104	32.9247	32.9928	33.2049	33.1784	33.5462	33.4648	33.3119	33.9346	33.7172	33.6028	33.8399	33.5304	33.6367	33.5036	33.6265	+	Colony A-3/WT	+	Colony B-3/WT	+	Colony C-3/WT	11	11	11	75.2	75.2	75.2	16.888	234680000000	521	3.52524	0.000352381	-0.566089	-7.46385	1.18637	0.0369507	-0.198981	-2.25373	1.33313	0.0316993	0.199327	2.50144	D0C9K9	LysM domain protein
29.1393	29.2626	29.219	29.0648	28.6841	28.9174	28.7331	28.8329	29.0096	28.612	29.0542	29.0129	29.1856	28.8507	28.9467	29.1461			+	Colony B-3/WT			10	10	10	62	62	62	26.705	10243000000	161	0.750104	0.0915951	0.139142	1.5263	1.34347	0.0265573	-0.24038	-2.51905	0.36326	0.328915	-0.110089	-0.839706	D0C9L0	Putative phosphomethylpyrimidine kinase
29.7545	29.6559	29.7758	29.8282	29.5305	29.4444	29.7857	29.4636	29.5175	29.1497	29.6886	29.3544	30.0477	29.8626	30.2331	30.1574	+	Colony A-3/WT	+	Colony B-3/WT	+	Colony C-3/WT	13	13	13	84.4	84.4	84.4	25.036	17114000000	218	1.96925	0.00574581	-0.321569	-3.64785	2.43794	0.0033297	-0.519104	-4.61142	2.439	0.00297333	-0.647601	-4.61373	D0C9L1	HAD hydrolase, family IA, variant 1
25.0197	25.287	24.5775	24.9452	25.3923	25.2036	25.6783	23.4847	25.2246	25.3663	25.4555	25.452	25.6319	25.5167	25.9267	25.5904	+	Colony A-3/WT			+	Colony C-3/WT	5	5	5	36	36	36	21.224	781310000	46	2.21017	0.00346128	-0.709105	-4.1276	0.702183	0.118559	-0.7267	-1.44522	1.49472	0.0232682	-0.291824	-2.7797	D0C9L4	Uncharacterized protein
27.9453	28.5953	28.509	28.4942	27.8412	27.8622	28.0935	28.1456	28.1325	28.1374	28.6425	28.5014	28.6956	28.4834	28.0443	28.2668			+	Colony B-3/WT			3	3	3	34.9	34.9	34.9	13.713	6471000000	53	0.0224781	0.909033	0.0134692	0.0659517	1.27996	0.0303547	-0.386868	-2.41124	0.0344688	0.88646	-0.0190473	-0.0998706	D0C9L5	Aspartate 1-decarboxylase
29.6468	29.5056	29.576	29.3637	29.375	29.1127	29.3844	29.1612	29.0259	28.6392	29.0245	28.9701	28.8735	28.856	29.4473	28.9453	+	Colony A-3/WT					11	11	11	76.7	76.7	76.7	20.938	11539000000	126	1.74399	0.00886372	0.492461	3.22468	0.704932	0.117823	0.227798	1.44988	0.286097	0.40667	-0.115619	-0.687424	D0C9L6	Peptidyl-tRNA hydrolase
33.3162	33.6219	33.5727	33.3254	33.4198	33.0261	33.1646	33.5389	33.3709	32.6826	33.0822	33.632	33.1707	33.2021	33.395	33.4882							7	7	7	68.9	68.9	68.9	11.573	208580000000	343	0.621828	0.130166	0.14505	1.3076	0.0680677	0.762718	-0.0266562	-0.190855	0.225675	0.483607	-0.122085	-0.561586	D0C9L7	50S ribosomal protein L25
32.7396	32.7706	32.7019	32.7174	32.7892	32.9663	32.8348	32.9086	32.7966	32.9093	32.9495	32.9884	32.2307	32.0864	31.9429	32.3191	+	Colony A-3/WT	+	Colony B-3/WT	+	Colony C-3/WT	21	21	21	78.2	78.2	78.2	34.416	132110000000	521	3.37215	0.00050108	0.587575	6.99698	3.68563	0.000182336	0.729972	7.98048	3.77751	0.000200837	0.766206	8.28987	D0C9L8	Ribose-phosphate pyrophosphokinase
26.2508	25.8155	25.8259	25.4703	25.4349	25.5851	25.6784	25.4299	25.7613	25.6775	25.4467	25.4351	25.9449	25.5821	25.9546	25.891			+	Colony B-3/WT	+	Colony C-3/WT	4	4	4	24.5	24.5	24.5	31.066	1052300000	39	0.00453265	0.980205	-0.00247478	-0.0135642	1.56759	0.0169538	-0.311049	-2.90759	1.14321	0.0490188	-0.26296	-2.18152	D0C9L9	4-diphosphocytidyl-2-C-methyl-D-erythritol kinase
29.362	29.3538	29.1235	29.258	29.4511	29.2641	28.7862	29.044	28.8993	29.3534	29.2908	29.4439	29.0323	29.0828	28.9168	28.9762	+	Colony A-3/WT					6	6	6	38.5	38.5	38.5	21.074	11369000000	95	2.20751	0.00345353	0.272313	4.12213	0.399881	0.264644	0.134349	0.909359	1.00705	0.0652388	0.244835	1.95489	D0C9M0	Outer-membrane lipoprotein LolB
28.0505	28.226	28.1188	28.0436	27.9653	27.9337	27.7207	27.9196	27.8802	27.7813	28.0943	27.7565	27.5438	27.5854	27.6397	27.3975	+	Colony A-3/WT	+	Colony B-3/WT	+	Colony C-3/WT	17	17	17	48.3	48.3	48.3	64.617	4646700000	172	3.83378	0	0.568104	8.48439	2.39402	0.00372727	0.343225	4.51563	1.95851	0.00867317	0.336447	3.62715	D0C9M1	Tetratricopeptide repeat protein
27.2074	26.9935	26.771	27.0359	27.1861	27.0645	27.134	27.0333	27.3381	27.0204	27.3992	27.2829	27.0922	27.2008	27.3624	27.4917	+	Colony A-3/WT					13	13	13	44.7	44.7	44.7	47.99	2923000000	115	1.19328	0.0320917	-0.284817	-2.2653	0.991688	0.0591233	-0.182305	-1.92938	0.0790985	0.764044	-0.0266147	-0.219561	D0C9M2	Glutamyl-tRNA reductase
27.0906	27.3437	27.2885	27.0627	27.2637	27.3815	27.4348	27.1701	27.2075	27.5094	27.2545	27.3394	27.5108	27.7866	27.7137	27.5502	+	Colony A-3/WT	+	Colony B-3/WT	+	Colony C-3/WT	21	21	21	37.5	37.5	37.5	71.245	3374700000	164	2.44095	0.0018995	-0.443969	-4.61803	1.99787	0.00655603	-0.327842	-3.70329	1.81102	0.0120091	-0.312648	-3.3483	D0C9M3	DNA primase
33.0111	32.905	32.8231	32.9492	33.3374	33.2792	33.4804	33.2802	33.2379	33.2565	33.2649	33.2749	32.8987	32.8263	32.9452	32.9209			+	Colony B-3/WT	+	Colony C-3/WT	25	25	25	82.1	82.1	82.1	42.828	178460000000	657	0.204609	0.45706	0.0243101	0.516022	3.77736	0.000200627	0.446501	8.28936	4.98036	0	0.360753	13.4506	D0C9M4	Outer membrane protein assembly factor BamD
28.0769	28.0123	28.173	28.3545	28.3598	28.4255	28.271	28.3204	28.5014	28.2808	28.3556	28.2737	28.6001	28.5437	28.4336	28.6199	+	Colony A-3/WT	+	Colony B-3/WT	+	Colony C-3/WT	11	11	11	45.7	45.7	45.7	39.224	6591400000	235	2.44421	0.00190189	-0.395114	-4.6252	2.08174	0.00567232	-0.205144	-3.86807	1.57163	0.0199842	-0.196438	-2.91474	D0C9M5	Pseudouridine synthase
25.5288	26.1414	26.0897	26.3267	26.4532	26.2351	25.5608	26.1963	23.7892	25.3764	26.2875	24.4392	24.9462	25.2314	25.9399	25.9981							2	2	2	14.8	14.8	14.8	19.971	1185000000	28	0.780071	0.0844012	0.492755	1.57673	0.912512	0.0716189	0.582461	1.79784	0.404775	0.293802	-0.55584	-0.918559	D0C9M7	Flavodoxin
28.2066	27.9252	28.1262	28.2326	28.5645	28.1682	27.9095	28.3142	28.1335	28.3454	28.2014	28.1239	28.0851	28.1638	27.9605	28.3427							6	6	6	49.4	49.4	49.4	18.08	5793600000	58	0.0507616	0.812615	-0.0153465	-0.144695	0.261601	0.396927	0.101087	0.637205	0.274666	0.4213	0.063067	0.664116	D0C9M8	SsrA-binding protein
28.8628	29.1951	29.087	28.8815	29.2146	28.9283	29.2678	28.9227	29.1463	28.474	29.1275	28.8822	29.3564	29.6314	29.5362	29.444	+	Colony A-3/WT	+	Colony B-3/WT	+	Colony C-3/WT	8	8	8	69.9	69.9	69.9	18.456	11399000000	137	2.54334	0.00173031	-0.485395	-4.84645	2.0174	0.00653275	-0.408645	-3.74134	1.88817	0.00983235	-0.584502	-3.49294	D0C9M9	Phosphopantetheine adenylyltransferase
25.5594	25.7257	25.5295	25.5105	25.6469	25.224	24.8402	25.5744	24.8671	25.2545	24.6576	25.6119	25.8523	25.7424	25.9649	25.804	+	Colony A-3/WT	+	Colony B-3/WT	+	Colony C-3/WT	5	5	5	16.7	16.7	16.7	42.603	919420000	35	2.0544	0.00460246	-0.25961	-3.81397	1.46088	0.0203227	-0.519524	-2.72085	1.85628	0.0107549	-0.743145	-3.43283	D0C9N6	Carnitine monooxygenase oxygenase subunit
27.9007	27.6795	27.684	27.6558	27.3366	27.3664	27.4097	27.2948	27.6339	27.9013	27.7649	27.8237	27.9328	28.0183	28.2394	28.0025	+	Colony A-3/WT	+	Colony B-3/WT	+	Colony C-3/WT	20	20	20	57.3	57.3	57.3	52.113	4322500000	224	1.96056	0.00593536	-0.318236	-3.63111	4.20121	0	-0.696361	-9.85571	1.65768	0.0168141	-0.267291	-3.06812	D0C9N7	Succinate-semialdehyde dehydrogenase [NAD(P)+]
27.419	27.6047	27.3614	27.1328	26.7017	26.6684	27.1421	27.0301	26.8822	26.3525	27.3098	27.1547	27.1368	26.9797	27.8384	27.2666							9	9	9	40.6	40.6	40.6	35.538	2874400000	69	0.132387	0.58417	0.0741134	0.351473	0.972043	0.0615947	-0.419775	-1.89675	0.647735	0.15451	-0.380592	-1.35223	D0C9N8	Carnitine monooxygenase reductase subunit
25.212	25.3075	25.6514	25.7566	25.5013	25.6014	25.6943	24.9961	25.4033	25.6203	25.3417	25.5163	24.9493	25.4657	25.2603	25.0209					+	Colony C-3/WT	6	6	6	20.8	20.8	20.8	40.684	854110000	37	0.880103	0.0661244	0.307813	1.74392	0.678056	0.125648	0.274212	1.40414	1.1717	0.0461978	0.296329	2.22915	D0C9N9	Uncharacterized protein
31.6923	31.5876	31.5918	31.5385	31.9336	31.8685	31.8743	31.898	32.0739	32.1236	31.9685	32.0676	31.599	31.7739	31.7675	31.7702	+	Colony A-3/WT	+	Colony B-3/WT	+	Colony C-3/WT	27	27	27	60.3	60.3	60.3	60.409	73403000000	407	1.23198	0.0298588	-0.125108	-2.3303	1.97322	0.00681403	0.165936	3.65553	3.07075	0.00105941	0.330745	6.14633	D0C9P0	Glutamine-dependent NAD(+) synthetase
22.7175	24.4479	23.9037	26.0334	23.1539	23.2478	23.4874	24.7125	22.7063	23.2623	24.5612	23.7065	23.2531	24.2172	23.4	23.147							1	1	1	5.3	5.3	5.3	17.732	171010000	9	0.479624	0.194491	0.771269	1.05648	0.125757	0.616561	0.146066	0.335611	0.0412597	0.866757	0.0547428	0.118724	D0C9P3	Protoporphyrinogen IX oxidase
33.3873	33.3799	33.7077	33.663	33.2548	33.4452	33.6115	33.5188	33.8894	33.8008	33.8038	33.6452	33.6754	33.4617	33.4754	33.6228					+	Colony C-3/WT	23	23	22	81.2	81.2	81.2	43.13	254310000000	741	0.0860913	0.699049	-0.0243464	-0.237489	0.500653	0.199924	-0.101277	-1.09441	1.65748	0.0167967	0.225953	3.06777	D0C9P4	Beta-ketoacyl-acyl-carrier-protein synthase I
31.6858	31.6585	31.6589	31.7349	31.8555	31.7617	31.3941	31.4641	32.3006	32.2937	32.0841	32.1183	31.6903	31.6268	31.7563	31.7636					+	Colony C-3/WT	24	24	24	63.9	63.9	63.9	49.287	73023000000	476	0.279006	0.361198	-0.0247302	-0.672992	0.330129	0.323179	-0.0904198	-0.775322	3.53356	0.000368794	0.489912	7.48995	D0C9P5	Uncharacterized protein
30.3458	30.3851	30.953	30.3118	30.1495	28.6408	23.091	30.4402	25.5452	28.2916	22.373	29.3339	29.1427	28.2386	27.3566	30.4034	+	Colony A-3/WT					4	4	4	24.2	24.2	24.2	13.766	14513000000	57	1.36926	0.0225523	1.7136	2.56309	0.146783	0.57385	-0.70497	-0.385434	0.687878	0.140567	-2.3994	-1.42088	D0C9P6	30S ribosomal protein S12
34.6227	34.7747	34.4779	34.425	34.8034	34.585	34.7368	34.6592	34.7214	34.6316	34.7419	34.7878	34.7394	34.9573	34.8529	34.7811	+	Colony A-3/WT					20	20	20	75.6	75.6	75.6	17.699	547100000000	521	1.5077	0.0158585	-0.257569	-2.80237	1.05384	0.0505568	-0.136569	-2.03263	0.994928	0.0666801	-0.111971	-1.93476	D0C9P7	30S ribosomal protein S7
36.4304	36.4136	36.3984	36.4191	36.4261	36.347	36.558	36.4555	36.3694	36.4398	36.4086	36.5296	36.4253	36.6528	36.6911	36.6817	+	Colony A-3/WT	+	Colony B-3/WT	+	Colony C-3/WT	65	65	65	80.6	80.6	80.6	78.839	1841400000000	2343	1.68402	0.0108852	-0.197363	-3.11561	1.13511	0.0407395	-0.16612	-2.168	1.30599	0.0336996	-0.175886	-2.45533	D0C9P8	Elongation factor G
35.544	35.3928	35.3088	35.1955	34.7853	34.8502	34.5645	35.0148	33.4385	34.7028	34.3339	33.9409	33.8154	34.6445	35.1096	35.3147							3	3	3	82.4	82.4	82.4	5.3673	580740000000	345	0.959183	0.0535123	0.639235	1.87539	0.0867466	0.708305	0.0826693	0.239159	0.69771	0.137501	-0.617013	-1.43761	D0C9P9	Elongation factor Tu C-terminal domain protein
26.5496	26.9016	26.3804	26.2356	27.0783	27.0023	27.0486	26.9422	26.668	26.7786	26.8839	27.0447	27.2575	27.297	27.1698	27.0856	+	Colony A-3/WT	+	Colony B-3/WT	+	Colony C-3/WT	8	8	8	75.5	75.5	75.5	17.193	2469600000	79	2.40593	0.00208374	-0.685647	-4.54147	1.7921	0.0108797	-0.184604	-3.31323	2.07578	0.00677939	-0.358662	-3.85623	D0C9Q2	[Ribosomal protein S18]-alanine N-acetyltransferase
25.3851	25.5304	25.2702	25.4183	25.7553	25.916	26.0441	25.381	25.3707	25.8089	25.5775	25.244	25.8369	26.2877	26.0795	26.0932	+	Colony A-3/WT			+	Colony C-3/WT	8	8	8	38.7	38.7	38.7	31.947	1073500000	77	3.13071	0.000514925	-0.673308	-6.30874	0.888127	0.0758998	-0.300204	-1.75728	2.00567	0.00849936	-0.574039	-3.71845	D0C9Q3	Aspartate/glutamate leucyltransferase
24.4507	22.7986	24.1177	25.4949	24.3778	23.4517	24.525	22.3648	24.668	24.5724	24.8532	24.3276	24.4166	24.5019	24.0393	24.0615							2	2	2	9.5	9.5	9.5	27.815	342560000	27	0.0235877	0.904468	-0.0393081	-0.0691254	0.515833	0.1914	-0.574994	-1.12159	1.13304	0.0502028	0.350503	2.16455	D0C9Q4	Leucyl/phenylalanyl-tRNA--protein transferase
31.3318	31.2044	31.512	31.6468	31.0802	31.4016	31.0957	31.1332	31.2647	31.3565	31.1615	30.8935	31.2081	31.2307	31.111	31.2594	+	Colony A-3/WT					11	11	11	69.5	69.5	69.5	33.807	49116000000	257	1.1282	0.0373161	0.221428	2.15647	0.111053	0.649231	-0.0246062	-0.299905	0.117728	0.672256	-0.0332584	-0.316207	D0C9Q5	Thioredoxin reductase
30.9734	30.8588	30.9183	30.9938	30.8206	30.8415	30.9403	30.848	30.9723	31.1166	30.951	31.0836	31.1112	31.1613	31.155	31.0779	+	Colony A-3/WT	+	Colony B-3/WT			46	46	46	62.5	62.5	62.5	112.13	40957000000	899	2.72514	0.00128843	-0.190289	-5.27011	3.68695	0.000182857	-0.26372	-7.98486	1.10071	0.0537108	-0.0955095	-2.11063	D0C9Q7	FtsK/SpoIIIE family protein
27.2298	27.501	26.9841	27.4543	27.2744	27.4682	27.7672	27.3379	27.7419	27.2717	27.8723	27.5505	27.7897	27.75	27.6617	28.3674	+	Colony A-3/WT	+	Colony B-3/WT			7	7	7	63.2	63.2	63.2	10.946	3961800000	133	1.62218	0.0119664	-0.599873	-3.00454	1.16237	0.0389345	-0.430277	-2.21354	0.65694	0.151162	-0.283091	-1.36802	D0C9Q9	Uncharacterized protein
31.5368	31.3067	31.5666	31.5996	31.9102	31.7603	31.9865	32.0385	31.8377	31.3486	32.166	32.0526	31.8057	31.2364	31.7004	31.6839			+	Colony B-3/WT			8	8	8	87.8	87.8	87.8	10.283	69310000000	195	0.307286	0.330641	-0.10421	-0.730081	1.19314	0.0363805	0.317279	2.26506	0.508772	0.224881	0.244615	1.10897	D0C9R0	Cell division topological specificity factor
33.7771	33.6779	33.679	33.6055	33.7164	33.682	33.6435	33.6637	33.6903	33.7081	33.5563	33.6634	33.4826	33.4549	33.5049	33.4359	+	Colony A-3/WT	+	Colony B-3/WT	+	Colony C-3/WT	26	26	26	80.6	80.6	80.6	30.738	254190000000	690	2.86638	0.000810207	0.215326	5.61636	4.12073	0	0.206841	9.53961	2.59548	0.00242623	0.184973	4.96553	D0C9R1	Septum site-determining protein MinD
29.7218	29.6588	29.4658	29.6995	29.7284	29.7466	29.7345	29.6726	29.8372	29.8665	29.6453	29.5461	30.0258	30.1204	30.0469	30.067	+	Colony A-3/WT	+	Colony B-3/WT	+	Colony C-3/WT	9	9	9	55.8	55.8	55.8	26.044	17904000000	209	3.35069	0.000493617	-0.428551	-6.9335	4.93253	0	-0.344492	-13.1989	2.2889	0.00425633	-0.341238	-4.29129	D0C9R2	Probable septum site-determining protein MinC
27.2447	27.1038	27.0181	26.806	26.7915	27.2094	27.0037	26.937	27.0726	27.0753	26.9083	26.7904	26.8091	27.1693	27.173	27.2609							5	5	5	23.3	23.3	23.3	40.626	2593800000	103	0.170798	0.509881	-0.0599194	-0.440733	0.388241	0.273081	-0.117681	-0.887379	0.538106	0.207629	-0.141428	-1.1612	D0C9R3	Uncharacterized protein
30.0636	30.244	30.1208	30.213	29.3314	30.3	29.6252	29.6532	29.8895	30.5126	29.9668	29.3637	30.5691	30.6062	30.3864	30.3166	+	Colony A-3/WT	+	Colony B-3/WT	+	Colony C-3/WT	12	12	12	59.4	59.4	59.4	35.411	24382000000	163	2.04548	0.00463265	-0.309222	-3.79638	1.85841	0.00904819	-0.742133	-3.43684	1.14645	0.0486279	-0.536414	-2.18693	D0C9R4	Acyltransferase
35.5418	35.5931	35.4555	35.6005	35.7552	35.8247	35.46	35.5984	35.5306	35.6583	35.4475	35.5769	35.2394	35.1984	35.1931	35.3335	+	Colony A-3/WT	+	Colony B-3/WT	+	Colony C-3/WT	18	18	18	68.7	68.7	68.7	22.485	973060000000	2728	3.22895	0.00046493	0.306611	6.58197	2.50603	0.00265546	0.418463	4.7624	2.90145	0.00178174	0.312228	5.7048	D0C9R5	OmpA family protein
29.9655	29.8857	29.9017	29.9231	30.0517	29.995	30.1095	30.0747	30.2537	30.0264	30.1923	30.1076	29.9234	30.0539	30.0894	30.0295	+	Colony A-3/WT					41	41	41	64.2	64.2	64.2	77.872	21348000000	510	1.41714	0.0200648	-0.105043	-2.64527	0.333322	0.320878	0.0336709	0.781589	1.02161	0.0634486	0.120972	1.97908	D0C9R6	ATP-dependent DNA helicase Rep
28.7975	28.7618	29.0669	28.8266	29.1813	28.8868	28.808	29.0565	29.0743	28.9454	29.1724	29.1899	29.7058	29.6441	29.6852	29.2972	+	Colony A-3/WT	+	Colony B-3/WT	+	Colony C-3/WT	5	5	5	61.3	61.3	61.3	16.371	11835000000	108	3.04486	0.000606702	-0.719859	-6.07719	2.47795	0.00282615	-0.599931	-4.69975	2.33031	0.00390169	-0.487558	-4.37885	D0C9R7	Deoxyuridine 5-triphosphate nucleotidohydrolase
28.0423	28.093	28.0956	28.0467	28.8297	28.7213	28.7824	28.5327	28.9242	28.9817	28.4803	28.7426	28.4787	28.5866	28.4812	28.5551	+	Colony A-3/WT	+	Colony B-3/WT	+	Colony C-3/WT	20	20	20	50	50	50	52.918	7733600000	193	5.23908	0	-0.456027	-14.8933	1.45391	0.0205203	0.191112	2.70878	1.16246	0.0473212	0.256787	2.2137	D0C9R8	Phosphoglucomutase/phosphomannomutase, alpha/beta/alpha domain II
31.5691	31.6	31.6411	31.5668	31.7487	31.6455	31.7034	31.6252	31.4938	31.6233	31.6602	31.6648	31.706	31.579	31.7852	31.7599	+	Colony A-3/WT					17	17	17	77.8	77.8	77.8	32.293	65366000000	386	1.21844	0.0308431	-0.113289	-2.30753	0.196554	0.489242	-0.0268235	-0.498337	0.789596	0.10932	-0.097002	-1.59271	D0C9R9	Acetylglutamate kinase
26.891	26.7411	27.0203	26.6698	26.925	26.8845	26.5996	26.3316	26.8784	26.6356	26.6234	26.7572	27.0097	27.1454	27.2932	27.2385	+	Colony A-3/WT	+	Colony B-3/WT	+	Colony C-3/WT	4	4	4	19.5	19.5	19.5	32.356	2421800000	64	1.84731	0.00746667	-0.341141	-3.41601	1.73561	0.0119552	-0.486517	-3.20936	2.69603	0.00256647	-0.448033	-5.20064	D0C9S1	Class II glutamine amidotransferase
29.8155	29.7793	30.0083	30.253	29.1721	29.9417	30.2621	29.6084	29.7128	29.2195	29.7246	29.2332	30.097	29.8731	29.8648	29.4647							6	6	6	51.7	51.7	51.7	18.382	17937000000	148	0.350718	0.288312	0.139144	0.815495	0.10873	0.654759	-0.0787868	-0.294196	0.925358	0.0791031	-0.352367	-1.8192	D0C9S2	Hemerythrin HHE cation binding domain protein
31.542	31.5509	31.3471	31.2664	31.6063	31.5669	31.307	31.4931	31.1823	31.4163	31.3086	31.4742	31.2894	31.6	31.3863	31.3224							11	11	11	81.1	81.1	81.1	14.36	54772000000	258	0.0995945	0.664863	0.0270591	0.271549	0.434617	0.239866	0.0938168	0.974143	0.23023	0.478606	-0.054194	-0.571313	D0C9S5	Outer membrane protein assembly factor BamE
31.1115	31.2927	30.9355	30.8772	30.7232	30.6783	30.989	30.8077	30.9601	30.5369	31.0507	31.1495	31.5412	31.7538	31.8123	31.846	+	Colony A-3/WT	+	Colony B-3/WT	+	Colony C-3/WT	5	5	5	40	40	40	16.729	47436000000	132	2.97457	0.000659864	-0.684092	-5.89248	4.15893	0	-0.938749	-9.68851	2.77247	0.00218776	-0.814021	-5.38441	D0C9S6	Ferric uptake regulation protein
27.5522	27.4512	27.2683	27.2936	27.7363	27.6211	27.2972	27.6296	27.79	27.4983	27.5584	27.5282	27.6764	27.6707	28.111	27.808	+	Colony A-3/WT					8	8	8	37	37	37	26.16	4139100000	83	1.86746	0.00731332	-0.425172	-3.45385	0.884011	0.0768877	-0.245438	-1.75042	0.922694	0.0797969	-0.222787	-1.81477	D0C9S9	Pyridoxal phosphate homeostasis protein
27.6191	27.6259	27.4377	27.4017	27.3558	27.1796	27.4417	27.2369	27.4862	27.4483	27.2557	27.9465	27.9807	28.1154	27.9619	27.8515	+	Colony A-3/WT	+	Colony B-3/WT	+	Colony C-3/WT	19	19	19	20.4	20.4	20.4	138.3	4150800000	97	2.89878	0.000823339	-0.456278	-5.69805	3.81653	0.000204473	-0.673868	-8.42434	1.52884	0.0220772	-0.443213	-2.83938	D0C9T0	Exonuclease SbcCD, C subunit
24.9031	24.8709	25.0808	26.6081	25.1648	23.3617	24.349	24.6332	24.7095	22.6628	24.3103	24.7964	24.7076	25.3751	25.1981	24.4453							8	8	8	22.5	22.5	22.5	48.526	472200000	28	0.408813	0.238143	0.434221	0.92613	0.602339	0.15278	-0.554316	-1.27383	0.73396	0.125344	-0.811782	-1.49905	D0C9T1	Nuclease SbcCD subunit D
25.874	25.8452	26.0122	25.4319	26.0966	25.9275	26.0785	26.0215	25.5832	25.966	26.0933	26.1685	25.7489	25.9369	25.7791	25.7567			+	Colony B-3/WT			4	4	4	35	35	35	18.504	1196800000	44	0.0380104	0.851794	-0.0145597	-0.109734	2.08028	0.00565315	0.22562	3.86517	0.488293	0.236287	0.147331	1.07216	D0C9T2	OsmC-like protein
26.383	26.7027	26.2063	26.3587	25.9722	25.8343	26.1128	25.6117	27.3	26.7221	27.1994	27.4615	25.5617	26.2043	25.586	26.3984	+	Colony A-3/WT			+	Colony C-3/WT	6	6	6	52	52	52	14.062	1766500000	29	1.03268	0.0455849	0.475065	1.99747	0.0830402	0.717245	-0.0548792	-0.229692	2.44585	0.00298328	1.23312	4.62879	D0C9T3	VOC domain-containing protein
25.8941	26.0324	25.7331	26.3571	26.3679	26.3811	25.9781	26.2657	25.6178	25.8238	26.2138	25.4802	25.6901	25.3608	25.433	25.5097	+	Colony A-3/WT	+	Colony B-3/WT			6	6	6	32.2	32.2	32.2	33.692	1198500000	38	1.82	0.00789772	0.505763	3.365	3.15915	0.000329218	0.749791	6.38691	0.814324	0.103256	0.285506	1.63414	D0C9T5	TIGR01777 family protein
26.9188	26.6512	26.5734	26.6706	26.5732	26.3539	26.6579	26.2211	26.5969	26.3206	26.6847	26.5671	26.9069	27.2706	27.3318	27.0885	+	Colony A-3/WT	+	Colony B-3/WT	+	Colony C-3/WT	10	10	10	39.6	39.6	39.6	41.891	2327000000	96	1.97878	0.00563007	-0.445953	-3.66627	2.62609	0.00194512	-0.697922	-5.03634	2.57107	0.0026121	-0.607116	-4.90955	D0C9T6	FAD dependent oxidoreductase
30.6276	30.3169	30.5926	30.6684	30.5535	30.7836	30.7308	30.6028	30.5762	30.6064	30.573	30.6937	30.6905	30.8219	30.7196	30.7474	+	Colony A-3/WT			+	Colony C-3/WT	15	15	15	53.2	53.2	53.2	40.556	34954000000	294	1.2076	0.0312537	-0.193484	-2.28933	0.601518	0.153074	-0.0772071	-1.27241	1.79981	0.0123139	-0.132533	-3.3275	D0C9T7	Delta-aminolevulinic acid dehydratase
25.9993	25.3055	25.4589	25.5553	25.938	25.3239	26.069	25.2179	25.8725	26.1447	25.7995	25.651	25.9668	25.9934	26.5627	25.5252							6	6	6	32.8	32.8	32.8	19.762	1136100000	37	0.832592	0.074048	-0.432286	-1.66469	0.583828	0.159473	-0.374824	-1.2416	0.250198	0.451153	-0.145075	-0.613469	D0C9T8	4HBT domain-containing protein
26.5452	26.3915	26.5906	26.9547	25.9986	25.8648	25.6063	26.1079	25.5048	25.7291	25.6043	25.8502	26.4348	26.4974	26.4193	26.7667			+	Colony B-3/WT	+	Colony C-3/WT	9	9	9	40.2	40.2	40.2	40.957	1519600000	62	0.258816	0.38428	0.0909777	0.631431	2.47977	0.00283008	-0.635141	-4.7038	3.62271	0.000396947	-0.857455	-7.77434	D0C9T9	Efflux pump membrane protein
28.3873	28.2669	28.3921	28.3581	28.198	28.306	28.3732	28.1609	28.3982	28.1986	28.3035	28.5168	29.0865	29.082	29.2106	29.2083	+	Colony A-3/WT	+	Colony B-3/WT	+	Colony C-3/WT	19	19	19	49.5	49.5	49.5	69.792	7820800000	246	5.60021	0	-0.795756	-17.156	5.18942	0	-0.887329	-14.6055	4.31426	0.000309677	-0.792573	-10.3157	D0C9U1	Gamma-glutamyltransferase
24.9228	24.6723	25.1621	24.6884	24.6108	24.6327	24.6369	24.7506	24.7688	24.8738	24.7838	24.7177	25.4356	25.0678	25.3049	25.5862	+	Colony A-3/WT	+	Colony B-3/WT	+	Colony C-3/WT	8	8	8	23	23	23	49.759	650490000	54	1.6519	0.0115272	-0.487243	-3.05775	3.03301	0.000593156	-0.690901	-6.04575	2.57172	0.00261676	-0.56262	-4.91104	D0C9U2	Site-specific recombinase, phage integrase family
29.2983	29.2782	29.6035	29.4442	29.6396	29.6385	29.7294	29.6634	29.9644	29.2746	29.8413	29.5729	29.4155	29.3339	29.5293	28.9347			+	Colony B-3/WT			9	9	9	62.1	62.1	62.1	25.445	15044000000	167	0.285465	0.354753	0.102711	0.686143	1.49574	0.0193831	0.364394	2.78149	0.911338	0.080842	0.359968	1.79589	D0C9U3	Uncharacterized protein
30.3784	30.4418	30.3706	30.4358	30.516	30.3995	30.3511	30.5491	30.4502	30.4801	30.4399	30.3938	30.1459	30.2648	30.4133	30.2944	+	Colony A-3/WT	+	Colony B-3/WT	+	Colony C-3/WT	20	20	20	62.1	62.1	62.1	39.156	27028000000	254	1.14876	0.0351902	0.127065	2.19079	1.28099	0.0303583	0.174325	2.41298	1.50313	0.022843	0.161392	2.79437	D0C9V6	Uncharacterized protein
27.454	27.275	27.1934	27.4251	27.2251	27.3546	27.3311	27.3631	27.2246	27.389	27.1005	26.9815	27.2054	27.075	27.0089	26.9621	+	Colony A-3/WT	+	Colony B-3/WT			12	12	12	48.3	48.3	48.3	41.348	3034300000	101	1.82149	0.00787557	0.274021	3.36779	2.21743	0.00469148	0.255606	4.14255	0.49778	0.231553	0.111066	1.08925	D0C9V7	Uncharacterized protein
23.3668	23.9956	23.6185	23.4584	24.6982	24.3519	24.5936	24.1521	24.2003	24.1446	24.0498	24.0884	24.1568	24.3629	24.5967	24.2012	+	Colony A-3/WT					4	4	4	16.1	16.1	16.1	35.923	363430000	37	2.25252	0.00279452	-0.719553	-4.21521	0.320794	0.330831	0.119558	0.756924	1.02856	0.0626129	-0.208595	-1.99063	D0C9W4	CRISPR-associated endonuclease Cas1
28.0235	28.1427	28.2112	28.2977	29.1645	29.1592	29.2359	29.2237	28.4656	28.1715	28.4092	28.8025	28.6559	28.7459	28.7984	28.4621	+	Colony A-3/WT	+	Colony B-3/WT			13	13	13	52	52	52	23.072	8250700000	204	2.73366	0.00117059	-0.496777	-5.29054	3.34872	0.000246014	0.530284	6.92769	0.651588	0.153582	-0.203371	-1.35885	D0C9W5	CRISPR-derived RNA endonuclease Csy4
30.2409	30.1449	30.0275	30.2056	31.1439	31.1472	31.0582	30.9456	30.789	30.7774	30.6752	30.6793	31.0266	31.1636	31.1568	31.0407	+	Colony A-3/WT			+	Colony C-3/WT	23	23	23	60.1	60.1	60.1	39.649	36235000000	316	5.39719	0	-0.942198	-15.8463	0.147543	0.573408	-0.0232067	-0.387211	3.59079	0.000389513	-0.366717	-7.6715	D0C9W6	CRISPR-associated protein, Csy3 family
27.1515	27.1908	27.6188	24.637	28.632	28.4185	28.3511	28.7125	27.5922	27.6593	27.639	26.2169	28.0683	27.5612	28.0909	27.7582			+	Colony B-3/WT			9	9	9	45.9	45.9	45.9	33.587	4653700000	51	0.893125	0.0642307	-1.22013	-1.76559	2.28442	0.00423354	0.658858	4.28187	0.780054	0.112067	-0.592822	-1.5767	D0C9W7	CRISPR-associated protein, Csy2 family
27.1691	27.0842	27.3135	27.2843	28.5726	28.5797	28.3522	28.3213	27.6481	27.8529	27.797	27.6982	28.3918	28.2276	28.6166	28.1866	+	Colony A-3/WT			+	Colony C-3/WT	10	10	10	40.2	40.2	40.2	44.165	5322800000	123	4.30752	0	-1.1429	-10.2877	0.364134	0.292668	0.100794	0.841385	2.8641	0.0017316	-0.606578	-5.61065	D0C9W8	Uncharacterized protein
25.2407	26.075	26.5282	26.5564	25.9551	26.0863	23.1136	26.2272	26.1334	26.4463	24.5541	24.4874	24.4546	26.2524	25.4296	23.4948							3	3	3	68.1	68.1	68.1	8.1582	1401700000	9	0.898846	0.0634595	1.19222	1.77511	0.178419	0.517252	0.437691	0.457952	0.258491	0.441583	0.497434	0.630756	D0C9W9	Uncharacterized protein
23.0056	24.7551	24.7942	24.6524	25.6173	25.4667	25.4599	25.4945	24.9307	25.065	25.1293	24.8256	25.4523	25.6102	25.7776	25.7696	+	Colony A-3/WT			+	Colony C-3/WT	10	10	10	21.2	21.2	21.2	81.609	779830000	55	1.65886	0.011494	-1.35062	-3.07025	0.838388	0.0857031	-0.14286	-1.67436	3.18837	0.000640884	-0.664803	-6.46802	D0C9X1	CRISPR-associated helicase Cas3
27.1679	27.2548	27.0732	27.1188	27.7053	27.4737	27.6828	27.4579	27.4279	27.0514	27.4231	27.2391	27.1087	27.2623	27.6136	27.2775			+	Colony B-3/WT			6	6	6	50	50	50	15.402	3244700000	70	0.692592	0.106164	-0.161878	-1.42891	1.10055	0.0446644	0.26441	2.11037	0.0780286	0.767373	-0.0301476	-0.2168	D0C9X2	Uncharacterized protein
26.8048	26.9067	26.3829	26.6017	26.7275	26.4405	26.1465	26.5643	26.7824	26.8687	26.8551	26.6157	23.1903	25.6458	25.1646	24.1552	+	Colony A-3/WT	+	Colony B-3/WT	+	Colony C-3/WT	6	6	6	58.3	58.3	58.3	19.765	1617500000	57	2.05871	0.00460718	2.13507	3.82247	1.86422	0.00880323	1.93079	3.44776	2.18664	0.00509497	2.24153	4.07937	D0C9X3	Uncharacterized protein
26.7446	26.6626	26.3748	26.5653	26.4906	26.1666	26.2673	26.2042	26.3073	26.0364	26.4632	26.6375	26.082	25.8905	26.5278	26.423	+	Colony A-3/WT					6	6	6	65.1	65.1	65.1	15.934	1617800000	71	1.10478	0.0393288	0.355978	2.11742	0.115721	0.638293	0.0513306	0.311323	0.275905	0.420039	0.130274	0.666653	D0C9X4	Uncharacterized protein
28.9956	28.856	28.7707	28.8356	28.91	29.1971	29.3395	29.1543	29.0226	28.7609	29.0352	29.1566	27.5282	27.4628	27.7149	27.6718	+	Colony A-3/WT	+	Colony B-3/WT	+	Colony C-3/WT	6	6	6	68	68	68	18.8	8545600000	186	5.53666	0	1.27006	16.7353	5.17265	0	1.55578	14.5094	5.02413	0	1.3994	13.685	D0C9X5	Uncharacterized protein
30.0885	30.0496	29.876	29.8015	30.3104	30.1308	30.2681	30.4777	30.0808	29.8886	30.1647	30.2388	28.5506	28.5535	28.7255	28.5105	+	Colony A-3/WT	+	Colony B-3/WT	+	Colony C-3/WT	14	14	14	52.1	52.1	52.1	27.34	18302000000	256	5.47823	0	1.36888	16.3571	5.98122	0	1.71171	19.902	5.55865	0	1.50819	16.8797	D0C9X6	Uncharacterized protein
30.4836	30.4929	30.3409	30.2841	30.2075	30.3453	30.7336	30.5131	30.7414	30.2223	30.6188	30.472	29.3256	29.2096	29.133	29.0807	+	Colony A-3/WT	+	Colony B-3/WT	+	Colony C-3/WT	8	8	7	53.1	53.1	48.8	18.557	23670000000	148	5.46917	0	1.2131	16.2993	4.25796	0	1.26264	10.0843	4.41143	0	1.32638	10.7265	D0C9X7	Uncharacterized protein
27.5663	27.4963	27.4134	27.6849	27.805	27.7487	27.6955	27.6188	27.5835	27.3231	27.6759	27.4417	25.7854	25.7107	25.9013	25.6913	+	Colony A-3/WT	+	Colony B-3/WT	+	Colony C-3/WT	9	9	9	53.5	53.5	53.5	16.676	3294100000	73	6.43173	0	1.76805	23.7039	7.16009	0	1.94482	31.4108	5.86613	0	1.73385	19.0304	D0C9Y0	Uncharacterized protein
23.8306	24.6327	24.6059	23.9668	24.2575	23.9993	23.6082	23.6351	24.1955	24.1779	23.9381	24.1286	24.3645	24.5866	24.9955	24.8441			+	Colony B-3/WT	+	Colony C-3/WT	7	7	7	32.2	32.2	32.2	34.21	380740000	55	0.878051	0.0663737	-0.438695	-1.7405	2.1161	0.00546958	-0.822651	-3.93662	2.08745	0.00664371	-0.587644	-3.87942	D0C9Y4	Dihydrodipicolinate synthetase family
27.5934	27.5699	26.4274	26.6287	26.6954	26.3683	27.3469	27.5219	26.7584	27.1324	27.6879	27.4413	25.015	24.934	24.9995	26.1046	+	Colony A-3/WT	+	Colony B-3/WT	+	Colony C-3/WT	23	20	20	32.5	30	30	98.97	2313900000	130	2.29557	0.00275524	1.79156	4.30532	2.34164	0.00379408	1.71982	4.40298	2.92601	0.00169888	1.99169	5.76735	D0C9Y7	Rhs element Vgr protein
28.2751	28.4534	28.4832	28.6881	28.1159	27.8772	28.1439	28.0821	27.9985	28.0117	28.2568	27.6729	27.4234	27.3088	24.0953	27.2521	+	Colony A-3/WT					4	4	4	42.7	42.7	42.7	18.956	4947200000	62	1.27542	0.0271429	1.95503	2.40355	0.969177	0.0621362	1.53486	1.89199	0.90868	0.0809614	1.46507	1.79147	D0C9Y9	Uncharacterized protein
26.6553	26.3245	26.6255	26.4739	26.636	26.8601	26.9512	26.909	26.6298	26.409	27.207	26.9897	26.8629	26.4219	26.9129	27.2913							10	10	10	26.8	26.8	26.8	73.853	2199700000	61	0.926076	0.0589127	-0.352479	-1.82039	0.0615141	0.782622	-0.0332022	-0.173542	0.0915239	0.733758	-0.0633745	-0.251279	D0C9Z2	PGAP1-like protein
28.8191	28.7059	28.4211	28.5896	28.9587	29.0926	29.1894	29.0731	28.8785	28.7908	28.8479	28.9514	29.4799	29.5242	29.6882	29.6449	+	Colony A-3/WT	+	Colony B-3/WT	+	Colony C-3/WT	10	10	10	64.7	64.7	64.7	31.992	11161000000	176	4.15604	0	-0.950402	-9.67718	3.50914	0.000276923	-0.505867	-7.41358	4.70561	0	-0.71717	-12.0635	D0C9Z4	Homocysteine S-methyltransferase
32.2632	32.1443	32.2338	32.289	32.4945	32.5219	32.5528	32.5774	32.3998	32.4289	32.3806	32.5084	32.5777	32.5615	32.5145	32.5767	+	Colony A-3/WT			+	Colony C-3/WT	32	32	32	77.5	77.5	77.5	60.436	111780000000	605	4.06714	0	-0.325002	-9.33418	0.392306	0.270481	-0.0209303	-0.895072	2.16265	0.00549311	-0.128154	-4.03052	D0C9Z6	Probable malate:quinone oxidoreductase
29.3446	29.2822	29.1326	29.4249	29.6067	29.6957	29.7171	29.5761	29.5416	29.6256	29.623	29.4771	29.5504	29.5564	29.5285	29.6595	+	Colony A-3/WT					23	23	23	58.7	58.7	58.7	63.559	14887000000	469	2.17739	0.00354084	-0.277631	-4.0605	0.838751	0.0857218	0.0751853	1.67497	0.0524747	0.834527	-0.00688982	-0.149329	D0C9Z7	Oxygen-dependent choline dehydrogenase
30.0718	29.7445	30.1143	30.2041	30.3873	30.4172	30.1627	30.2945	30.2545	30.2586	30.1461	30.3789	29.8852	30.4098	30.362	30.2785							20	20	20	58	58	58	53.149	24052000000	328	0.60843	0.135177	-0.200209	-1.2844	0.251371	0.410237	0.081531	0.615923	0.0713549	0.783782	0.0256281	0.199465	D0C9Z8	NAD/NADP-dependent betaine aldehyde dehydrogenase
28.0008	28.1087	28.1419	28.1236	27.9664	27.8633	28.1194	28.0882	28.0659	27.3466	28.0812	28.0624	27.3925	27.7168	27.8806	27.6687	+	Colony A-3/WT	+	Colony B-3/WT			8	8	8	48.4	48.4	48.4	24.714	4814700000	106	2.16638	0.0036	0.429105	4.0381	1.58596	0.0162697	0.344698	2.9401	0.493878	0.233477	0.224394	1.08223	D0C9Z9	HTH-type transcriptional regulator BetI
27.8488	27.3855	27.6792	27.6106	27.2175	27.3043	27.3317	27.1737	27.5916	27.36	27.5204	27.5514	27.0008	27.2537	27.3112	27.2088	+	Colony A-3/WT			+	Colony C-3/WT	10	10	10	16.1	16.1	16.1	77.375	3370500000	115	2.00985	0.00507307	0.437391	3.72661	0.353344	0.301854	0.0631943	0.82058	1.99285	0.00868182	0.312241	3.69354	D0CA01	Transporter, betaine/carnitine/choline family
27.7864	27.8676	28.041	27.786	27.7423	27.4352	27.8924	27.8808	28.1418	28.2458	28.3784	28.2677	27.9103	27.9998	27.7411	27.8752					+	Colony C-3/WT	8	8	8	42.1	42.1	42.1	19.32	5069900000	90	0.0493958	0.816596	-0.0113564	-0.140991	0.564367	0.167684	-0.143926	-1.20752	2.69943	0.0025764	0.376823	5.20871	D0CA03	Thioesterase family protein
27.5143	27.5627	27.2032	27.6874	27.2082	27.2182	27.6621	27.1255	27.7389	27.5226	27.8291	27.239	27.2628	27.024	27.0478	27.3229	+	Colony A-3/WT			+	Colony C-3/WT	8	8	8	34.6	34.6	34.6	38.231	3398600000	82	1.37241	0.0222534	0.327551	2.56848	0.43471	0.239885	0.139146	0.974317	1.48447	0.0236695	0.418022	2.76184	D0CA05	CobW/P47K family protein
26.6958	26.8382	26.4684	26.4376	26.7323	26.7383	26.9773	26.64	26.6931	26.3881	26.7706	26.7096	26.9614	26.8163	27.2276	27.078	+	Colony A-3/WT	+	Colony B-3/WT	+	Colony C-3/WT	5	5	5	42	42	42	20.185	2594300000	63	1.71804	0.00944377	-0.410778	-3.17732	1.15361	0.0394411	-0.248811	-2.1989	1.68076	0.0163712	-0.380419	-3.10971	D0CA07	YaeQ protein
28.8274	29.0801	28.8053	28.9939	28.9333	29.0364	28.8128	28.8794	29.0119	29.0896	29.0464	28.6304	28.8007	28.9812	28.8763	28.6265							7	7	7	77.9	77.9	77.9	12.577	9549300000	121	0.479792	0.194532	0.10551	1.05679	0.485413	0.208586	0.0942955	1.06696	0.42271	0.281802	0.123409	0.952067	D0CA08	Peptidyl-prolyl cis-trans isomerase
28.4554	28.5205	28.4484	28.5037	28.2966	28.4861	28.3965	28.2566	28.4233	28.3533	28.3956	28.5241	28.4888	28.3194	28.6108	28.4938							28	28	28	57.4	57.4	57.4	76.719	6996300000	305	0.0208228	0.915123	0.00382805	0.0612035	0.73886	0.108796	-0.11923	-1.50733	0.328483	0.362572	-0.0541267	-0.772088	D0CA09	Poly-beta-1,6-N-acetyl-D-glucosamine N-deacetylase PgaB
28.0361	28.0384	27.9491	28.0513	28.321	28.1612	28.2744	28.2852	28.1904	28.4568	28.3457	28.3129	27.9983	28.1725	28.158	27.8897			+	Colony B-3/WT	+	Colony C-3/WT	10	10	10	55	55	55	28.716	5796300000	139	0.197951	0.465029	-0.0359082	-0.501415	1.45386	0.0205037	0.205804	2.70869	1.68733	0.0160462	0.271823	3.1216	D0CA13	Enoyl-CoA hydratase/isomerase family protein
27.1977	27.2361	27.6381	27.0331	27.507	27.413	27.5027	27.3988	27.5347	27.2948	27.1533	27.3943	27.3186	27.5283	27.312	27.5015							13	13	13	64.1	64.1	64.1	30.335	3329200000	112	0.440881	0.217582	-0.138842	-0.985706	0.254902	0.405847	0.0402899	0.62329	0.299281	0.392465	-0.0707793	-0.714047	D0CA16	Transcriptional regulator, IclR family, C-terminal domain protein
24.5772	24.2193	24.7657	22.5376	24.1746	25.0523	24.2837	24.4762	24.0245	24.1668	23.8415	24.2727	23.9957	24.3206	22.8784	23.4347							5	5	5	28.3	28.3	28.3	19.97	319220000	20	0.249997	0.395541	0.367601	0.613049	NaN	1	0	NaN	0.597671	0.176191	0.419061	1.26572	D0CA24	Cupin domain protein
22.8786	24.9701	28.4	24.5439	26.5621	24.4549	27.1043	25.4827	24.7097	22.9729	23.9204	25.6095	27.1334	27.2417	27.6744	27.2299			+	Colony B-3/WT	+	Colony C-3/WT	4	4	4	9.2	9.2	9.2	52.598	3522600000	12	0.926556	0.0588621	-2.12169	-1.82119	1.25147	0.0318235	-1.41886	-2.36313	2.71668	0.00249116	-3.01674	-5.24985	D0CA28	Putative betaine-aldehyde dehydrogenase
26.2792	25.9885	25.7605	25.1316	25.8961	25.4892	26.1901	25.5161	26.4732	25.4618	25.6783	26.0381	26.2247	26.0945	26.1289	25.948							7	7	7	18.9	18.9	18.9	58.403	1297000000	25	0.579593	0.145973	-0.309078	-1.2342	0.940826	0.0666257	-0.326191	-1.8449	0.349998	0.341849	-0.186194	-0.8141	D0CA29	Thiamine pyrophosphate enzyme, C-terminal TPP binding domain protein
25.1196	23.0804	25.0441	25.1088	25.0611	24.2825	24.3924	25.07	24.7464	24.859	24.9115	24.5294	24.1817	23.6004	24.9954	25.0861							3	3	3	16.7	16.7	16.7	47.658	456950000	20	0.0712255	0.743814	0.12234	0.199127	0.230909	0.439284	0.23564	0.57276	0.350269	0.341802	0.295686	0.814625	D0CA31	Transporter, major facilitator family protein
26.7406	26.7391	26.9308	27.1381	26.5905	26.8862	26.3365	26.5501	26.7308	26.039	26.8461	26.5792	26.3417	26.6281	26.4162	26.7714	+	Colony A-3/WT					3	3	3	35.6	35.6	35.6	17.741	2014500000	45	1.35814	0.0232547	0.347772	2.54408	0.12901	0.609606	0.0514698	0.343412	0.0156215	0.947037	0.00940943	0.0461747	D0CA32	Peptide deformylase
25.5833	25.3588	25.3529	23.6025	25.7192	25.1154	25.5511	25.4059	25.2944	25.5589	25.6858	25.6549	26.9307	26.8634	26.804	26.6255	+	Colony A-3/WT	+	Colony B-3/WT	+	Colony C-3/WT	10	10	10	40.9	40.9	40.9	48.316	1240100000	81	2.117	0.00388913	-1.83153	-3.93844	4.09635	0	-1.35798	-9.44565	4.56133	0	-1.2574	-11.3897	D0CA33	Glutaminase
31.8455	31.715	31.859	31.8948	32.6191	32.7184	32.4733	32.4456	32.6163	32.4113	32.2678	32.3696	31.6328	31.6791	31.5607	31.6381	+	Colony A-3/WT	+	Colony B-3/WT	+	Colony C-3/WT	16	16	16	65.6	65.6	65.6	41.576	92273000000	483	2.30978	0.002723	0.20089	4.33531	5.01947	0	0.936439	13.6599	4.28985	0.000303797	0.788561	10.2147	D0CA36	Aldose 1-epimerase
26.0508	25.5344	25.6745	26.0899	25.6289	25.1492	25.5308	25.6463	25.397	25.4412	25.7952	25.5594	25.6551	24.2821	24.7369	23.8559	+	Colony A-3/WT	+	Colony B-3/WT	+	Colony C-3/WT	5	5	5	28.6	28.6	28.6	34.288	830200000	30	1.58806	0.0132607	1.20488	2.94383	1.11082	0.0433844	0.856308	2.12748	1.22269	0.0405817	0.915681	2.31467	D0CA38	LysR substrate binding domain protein
30.5582	30.399	30.42	30.3229	30.5258	30.3524	30.4479	30.4167	30.2422	30.3962	30.3573	30.4942	30.4514	30.6304	30.5736	30.47					+	Colony C-3/WT	30	30	30	54.8	54.8	54.8	81.935	27815000000	458	0.816031	0.0773652	-0.106332	-1.637	0.86283	0.0811334	-0.095674	-1.71514	1.25004	0.0378656	-0.15888	-2.36072	D0CA43	Putative 5-methyltetrahydrofolate--homocysteine methyltransferase
28.1425	28.1909	28.0906	28.1322	28.0313	28.3355	28.2611	27.9697	28.6508	28.2809	27.9988	28.5255	28.8079	28.8466	28.7528	28.7358	+	Colony A-3/WT	+	Colony B-3/WT	+	Colony C-3/WT	8	8	8	20.8	20.8	20.8	58.178	6835800000	150	5.96224	0	-0.646735	-19.7556	3.35042	0.00024714	-0.636386	-6.9327	1.55517	0.0208289	-0.421786	-2.88568	D0CA45	Phosphate transporter
27.908	27.8755	27.4759	27.63	27.948	27.9248	27.7454	27.712	27.7662	28.0666	27.6078	27.9692	28.2603	28.6983	28.3003	28.3455	+	Colony A-3/WT	+	Colony B-3/WT	+	Colony C-3/WT	13	13	13	34	34	34	48.986	5116500000	154	2.48517	0.00182101	-0.678733	-4.71583	2.54207	0.00228489	-0.568545	-4.84358	2.05494	0.00748825	-0.548643	-3.81502	D0CA46	Probable D-serine dehydratase
31.499	31.5497	31.5269	31.6141	31.6849	31.7616	31.8992	31.7002	31.9158	31.7775	31.8973	31.7568	31.4856	31.4352	31.4122	31.4122	+	Colony A-3/WT	+	Colony B-3/WT	+	Colony C-3/WT	26	26	26	77.3	77.3	77.3	57.228	64730000000	579	1.99676	0.00554582	0.111109	3.70113	3.1208	0.000488978	0.32518	6.28165	3.99563	0.000241206	0.400517	9.06618	D0CA47	Uncharacterized protein
31.1377	31.0873	31.0637	31.1453	30.8929	31.0996	30.8858	30.821	30.9971	30.7375	30.8591	30.924	31.1676	30.9646	31.1265	31.1334			+	Colony B-3/WT	+	Colony C-3/WT	18	18	18	73.2	73.2	73.2	33.4	41558000000	378	0.0758399	0.729381	0.0104437	0.211136	1.20926	0.0348722	-0.173233	-2.29211	1.65574	0.0167619	-0.21865	-3.06465	D0CA50	VacJ-like protein
23.9996	22.6493	24.8869	26.9754	25.3486	23.3887	23.5737	23.5211	23.8821	25.3791	24.7761	25.7791	26.288	26.2998	26.9953	26.3536	+	Colony A-3/WT	+	Colony B-3/WT	+	Colony C-3/WT	6	6	6	32.6	32.6	32.6	36.627	1243700000	18	1.04007	0.0450564	-1.85636	-2.00974	2.65219	0.00187982	-2.52613	-5.09723	1.85289	0.01073	-1.53007	-3.42648	D0CA51	Stage II sporulation protein E
26.5102	26.4873	26.4058	26.3511	26.4892	25.9304	25.6826	26.2617	25.5587	25.8972	25.8966	26.2164	24.4205	24.6375	24.6741	24.6135	+	Colony A-3/WT	+	Colony B-3/WT	+	Colony C-3/WT	3	3	3	17.6	17.6	17.6	21.633	1161200000	29	6.80718	0	1.85215	27.4095	3.70756	0.000187135	1.50456	8.05343	3.96656	0.00023301	1.30583	8.95917	D0CA52	STAS domain protein
27.0746	27.3227	27.3059	26.8261	26.8585	26.652	26.8119	26.8328	26.7771	27.0884	27.5855	26.9585	26.7661	27.3116	26.4927	27.3885							6	6	6	51.7	51.7	51.7	16.548	2706600000	61	0.2347	0.413413	0.142581	0.580818	0.399997	0.264665	-0.200956	-0.909576	0.155946	0.598181	0.112607	0.406727	D0CA55	Organic hydroperoxide resistance transcriptional regulator
30.9686	31.0318	30.4368	30.5302	31.0464	31.0585	31.1287	30.94	30.56	30.7029	30.8524	30.8312	30.1593	30.1277	30.3866	30.4706	+	Colony A-3/WT	+	Colony B-3/WT	+	Colony C-3/WT	5	5	5	55.9	55.9	55.9	15.118	34207000000	131	1.41195	0.0202277	0.455791	2.63633	3.73742	0.000194529	0.75735	8.15364	2.23149	0.0045592	0.450556	4.17158	D0CA56	Organic hydroperoxide resistance protein OhrB
28.429	28.2273	28.2135	28.3984	28.6469	28.3869	28.4946	28.5804	28.3558	28.4409	28.6089	28.5022	28.7363	28.8638	29.0799	28.7697	+	Colony A-3/WT	+	Colony B-3/WT	+	Colony C-3/WT	14	14	14	34.4	34.4	34.4	55.46	7542400000	184	2.90123	0.000824675	-0.545394	-5.70426	1.89527	0.00823313	-0.335224	-3.5064	2.19908	0.00511641	-0.385477	-4.10484	D0CA57	Type II secretion system protein E
29.149	29.1921	29.2705	29.2795	29.8003	29.6359	29.8409	29.7542	29.6049	29.5961	29.6434	29.6863	29.7654	29.727	29.7206	29.9134	+	Colony A-3/WT			+	Colony C-3/WT	15	15	15	85.3	85.3	85.3	31.88	16387000000	298	4.2796	0	-0.558843	-10.1727	0.143089	0.5814	-0.0238123	-0.37678	1.62346	0.0179011	-0.148943	-3.00682	D0CA58	Uncharacterized protein
27.4331	27.4506	27.0412	26.9801	27.3809	27.3825	27.3445	27.3947	27.1898	27.8684	27.3797	27.3252	27.6441	27.7938	27.7401	27.8618	+	Colony A-3/WT	+	Colony B-3/WT			7	7	7	32.5	32.5	32.5	34.272	3607100000	73	2.14931	0.0037397	-0.533693	-4.00349	3.73385	0.000193939	-0.384313	-8.14159	1.0699	0.0583988	-0.319175	-2.05934	D0CA59	Transporter, small conductance mechanosensitive ion channel MscS family protein
31.2196	31.1143	31.175	31.2624	31.4054	31.5183	31.5373	31.5171	31.4695	31.3873	31.497	31.5648	31.4472	31.494	31.523	31.5004	+	Colony A-3/WT					49	49	49	67.5	67.5	67.5	103.92	55219000000	778	3.81369	0.000129032	-0.298317	-8.41451	0.0341312	0.87028	0.00336695	0.0989266	0.106009	0.699939	-0.011507	-0.287482	D0CA61	DNA polymerase I
25.9379	26.3113	26.0994	26.1034	26.7045	25.1756	26.4386	26.1545	26.0273	26.3696	26.1947	25.308	26.4868	26.4624	26.8474	26.5186	+	Colony A-3/WT			+	Colony C-3/WT	3	3	3	14.3	14.3	14.3	21.096	1482800000	31	2.11549	0.00388085	-0.46579	-3.93541	0.636046	0.139844	-0.460495	-1.33213	1.28322	0.0353851	-0.603916	-2.41674	D0CA62	YGGT family protein
29.3707	29.3742	29.2441	29.2124	28.8298	29.1466	29.1336	29.1105	29.4544	29.3261	29.4043	29.3476	29.7629	29.6219	29.3721	29.3493	+	Colony A-3/WT	+	Colony B-3/WT			13	13	13	58	58	58	29.044	12992000000	148	1.084	0.0409893	-0.226195	-2.08281	2.0272	0.00635683	-0.471434	-3.76051	0.662135	0.149201	-0.143463	-1.37692	D0CA63	Pyrroline-5-carboxylate reductase
25.5751	25.43	25.1129	25.2432	25.8695	25.3162	25.5069	25.5726	25.2015	25.3926	25.2743	24.5198	25.7115	25.8195	25.5414	25.3444					+	Colony C-3/WT	9	9	9	24.8	24.8	24.8	54.278	827040000	55	0.92277	0.0592338	-0.263886	-1.8149	0.0890243	0.702893	-0.0379071	-0.244949	1.20384	0.0429489	-0.507162	-2.28302	D0CA64	tRNA(Ile)-lysidine synthase
32.5617	32.6958	32.7471	32.7658	33.0502	33.1433	33.0205	32.8675	32.9506	32.9468	32.8207	32.8103	33.5082	33.4155	33.433	33.3962	+	Colony A-3/WT	+	Colony B-3/WT	+	Colony C-3/WT	17	17	17	78.4	78.4	78.4	29.673	170760000000	548	5.13437	0	-0.745651	-14.2925	3.27298	0.000236842	-0.417844	-6.70744	4.73042	0	-0.556122	-12.183	D0CA65	Acetyl-coenzyme A carboxylase carboxyl transferase subunit alpha
30.3411	30.4193	30.2077	30.2287	30.5973	30.5858	30.54	30.5981	30.4509	30.8134	30.5162	30.6551	30.8297	31.1516	31.0022	30.8789	+	Colony A-3/WT	+	Colony B-3/WT	+	Colony C-3/WT	25	25	25	51.6	51.6	51.6	56.597	32711000000	324	3.57903	0.000368159	-0.666413	-7.63389	2.72449	0.0018147	-0.385315	-5.26853	1.78977	0.0124009	-0.356691	-3.3089	D0CA66	Exopolyphosphatase
32.8046	32.8887	32.8446	33.0423	32.8987	32.733	33.1036	32.8395	33.073	32.2817	32.8581	32.8646	33.2225	33.1421	33.5899	33.3201	+	Colony A-3/WT	+	Colony B-3/WT	+	Colony C-3/WT	5	5	5	50	50	50	13.165	166280000000	189	2.06486	0.00463093	-0.423606	-3.83462	1.84169	0.00943936	-0.424953	-3.40549	1.50787	0.0225968	-0.549316	-2.80267	D0CA67	Thioredoxin
32.6985	32.5619	32.609	32.7048	32.692	32.5904	32.6416	32.7044	32.7945	32.5696	32.6604	32.6562	32.7066	32.8123	32.7885	32.7167	+	Colony A-3/WT	+	Colony B-3/WT			31	31	31	75.8	75.8	75.8	47.526	132360000000	563	1.3782	0.0219985	-0.112477	-2.57838	1.43718	0.0211632	-0.0989466	-2.67984	0.800877	0.106382	-0.0858803	-1.61163	D0CA68	Transcription termination factor Rho
32.3406	32.5054	32.6711	32.6684	32.9785	32.558	33.0079	32.7512	32.7264	33.0837	32.7282	32.729	32.0456	32.8025	32.066	32.2047			+	Colony B-3/WT	+	Colony C-3/WT	7	7	7	61.2	61.2	61.2	11.178	128310000000	234	0.658783	0.1176	0.266682	1.37118	1.40905	0.0223873	0.544181	2.63134	1.4496	0.0255416	0.537104	2.70132	D0CA70	Integration host factor subunit alpha
32.385	32.2033	32.2228	32.2502	32.6404	32.6428	32.5245	32.3962	32.5407	32.6009	32.544	32.5763	32.6935	32.9798	32.9537	32.9267	+	Colony A-3/WT	+	Colony B-3/WT	+	Colony C-3/WT	45	45	45	74.4	74.4	74.4	87.706	124600000000	883	3.70014	0.00027882	-0.623117	-8.02869	2.06232	0.00583036	-0.337456	-3.8296	2.51908	0.00265505	-0.322955	-4.7917	D0CA71	Phenylalanine--tRNA ligase beta subunit
31.788	31.4839	31.605	31.6761	31.9092	31.9457	31.7871	31.8782	31.9639	31.9364	31.9199	32.0678	32.2062	32.2883	32.3009	32.1058	+	Colony A-3/WT	+	Colony B-3/WT	+	Colony C-3/WT	19	19	19	69.6	69.6	69.6	36.684	79450000000	377	3.5429	0.000355769	-0.587059	-7.51934	3.06261	0.000601156	-0.345284	-6.12453	2.39939	0.00331079	-0.253331	-4.52727	D0CA72	Phenylalanine--tRNA ligase alpha subunit
28.1424	27.958	27.917	28.0649	28.3806	28.391	28.2163	28.3704	28.1434	28.3804	28.1481	28.3392	28.52	28.5824	28.2328	28.9543	+	Colony A-3/WT					10	10	10	30.7	30.7	30.7	42.264	6316700000	139	1.90075	0.00681749	-0.551806	-3.51678	0.741592	0.107765	-0.232781	-1.51194	1.02605	0.0628354	-0.319609	-1.98645	D0CA73	Uncharacterized protein
26.2194	26.0733	26.0766	25.993	26.0358	25.826	26.2938	26.0896	25.9921	25.9017	25.8863	25.6316	26.1382	25.6331	25.9797	25.4346							7	7	7	29.7	29.7	29.7	21.928	1252100000	72	0.890833	0.0643968	0.294165	1.76178	0.686037	0.123671	0.264876	1.41775	0.118335	0.671082	0.0565157	0.317682	D0CA75	DUF1768 domain-containing protein
30.7504	30.806	30.8986	31.0256	31.8305	31.1371	31.0152	31.0595	31.9972	31.9436	31.6449	32.0925	31.1527	31.5269	31.4295	31.4215	+	Colony A-3/WT			+	Colony C-3/WT	5	5	5	35.3	35.3	35.3	13.437	58211000000	312	2.65656	0.00143099	-0.512516	-5.10746	0.237857	0.4293	-0.122086	-0.587508	2.28075	0.00428319	0.536905	4.27416	D0CA76	50S ribosomal protein L20
29.3376	29.4993	29.5566	29.4291	29.7312	29.871	29.7225	29.8517	29.8014	29.3864	29.544	29.2694	29.6025	29.4238	29.7057	29.4462			+	Colony B-3/WT			13	13	13	60.7	60.7	60.7	23.872	15631000000	205	0.496304	0.184996	-0.0888963	-1.08659	1.74344	0.0116388	0.249527	3.22367	0.124542	0.658319	-0.0442681	-0.33269	D0CA81	Glutathione S-transferase, N-terminal domain protein
31.9816	31.8128	32.0689	32.0516	32.4388	32.2731	32.3906	32.6044	32.1464	32.3672	32.1099	32.3075	32.2721	32.3251	32.3878	32.4918	+	Colony A-3/WT					9	9	9	62.5	62.5	62.5	12.95	98466000000	213	2.69478	0.00144729	-0.390463	-5.19768	0.287504	0.368876	0.0575275	0.690279	0.883673	0.0863619	-0.136436	-1.74986	D0CA82	Translation initiation factor IF-3
33.2173	33.1945	33.0959	33.2643	33.3153	33.2829	33.28	33.267	33.3123	33.3465	33.349	33.2675	33.3219	33.3001	33.4324	33.2677	+	Colony A-3/WT					50	50	50	68.9	68.9	68.9	73.178	200380000000	1129	1.46607	0.0176411	-0.137488	-2.72986	0.553665	0.172098	-0.0442104	-1.18869	0.106194	0.699743	-0.0116634	-0.287941	D0CA83	Threonine--tRNA ligase
30.5466	30.3864	30.4394	30.6234	30.6916	30.6502	30.7377	30.6984	30.974	30.8555	30.7927	30.8152	30.286	30.2894	30.4326	30.3813	+	Colony A-3/WT	+	Colony B-3/WT	+	Colony C-3/WT	16	16	16	47.8	47.8	47.8	60.254	31685000000	387	1.24946	0.0287397	0.151589	2.35975	3.87671	0.000214047	0.34713	8.63545	4.10171	0.000268156	0.511992	9.46625	D0CA84	Long-chain-fatty-acid--CoA ligase
29.5569	29.5719	29.5786	29.3415	29.4335	29.464	29.4722	29.4541	29.4274	29.2826	29.3681	29.5681	29.6307	29.5926	29.7417	29.7843	+	Colony A-3/WT	+	Colony B-3/WT	+	Colony C-3/WT	10	10	10	65.7	65.7	65.7	20.698	14803000000	268	1.27583	0.0271625	-0.175097	-2.40424	2.62359	0.00194216	-0.231378	-5.03051	1.97967	0.00858427	-0.27578	-3.66799	D0CA85	Uncharacterized protein
29.8127	30.1667	29.7906	29.9204	29.9855	29.7604	29.6943	30.0566	30.1565	29.5084	29.7859	30.0005	30.2133	29.9807	30.3054	30.0342			+	Colony B-3/WT			4	4	4	54.4	54.4	54.4	11.121	19807000000	91	0.935325	0.0573058	-0.210804	-1.83576	1.18071	0.0371968	-0.259222	-2.24423	0.850616	0.0937024	-0.270562	-1.69477	D0CA86	Phosphocarrier, HPr family
29.048	29.1859	29.2961	29.187	29.0009	29.2103	29.1757	29.1279	29.184	29.3167	29.0191	28.69	29.222	29.0432	29.1259	28.9211							17	17	17	71.4	71.4	71.4	32.557	11099000000	172	0.58336	0.144287	0.101198	1.24078	0.265306	0.392936	0.0506692	0.644867	0.0606175	0.812132	-0.025599	-0.171158	D0CA87	Nucleotide-binding protein HMPREF0010_01667
30.5158	30.4649	30.3576	30.3438	30.4663	30.4125	30.5272	30.3868	30.425	30.2667	30.217	30.2311	31.2395	31.319	31.3501	31.4875	+	Colony A-3/WT	+	Colony B-3/WT	+	Colony C-3/WT	17	17	17	79.8	79.8	79.8	31.065	33629000000	297	5.07737	0	-0.928482	-13.9753	5.24498	0	-0.900835	-14.9279	5.27485	0	-1.06405	-15.104	D0CA88	Pantothenate synthetase
31.1171	31.1462	31.115	31.0198	31.1586	31.0963	31.1247	31.2484	30.8114	30.8348	30.8707	31.2074	31.385	31.4155	31.3984	31.5491	+	Colony A-3/WT	+	Colony B-3/WT	+	Colony C-3/WT	12	12	12	52.4	52.4	52.4	28.976	46901000000	251	3.4432	0.000335601	-0.337493	-7.21059	2.84925	0.00109599	-0.280015	-5.57353	2.62878	0.00247124	-0.505933	-5.04259	D0CA89	3-methyl-2-oxobutanoate hydroxymethyltransferase
27.6736	28.1069	27.8502	27.4258	27.2572	27.3492	27.5402	27.543	27.3664	27.0747	27.4047	27.4322	28.289	28.3192	28.2824	28.4988	+	Colony A-3/WT	+	Colony B-3/WT	+	Colony C-3/WT	8	8	8	75.6	75.6	75.6	18.106	4531300000	127	2.06007	0.00461191	-0.583206	-3.82515	4.36728	0	-0.924952	-10.538	4.3748	0	-1.02782	-10.5699	D0CA90	2-amino-4-hydroxy-6-hydroxymethyldihydropteridine diphosphokinase
29.9866	29.9263	29.8656	29.8763	30.3729	30.3117	30.2398	30.2457	30.324	30.479	30.3975	30.3238	30.4757	30.7812	30.687	30.7585	+	Colony A-3/WT	+	Colony B-3/WT	+	Colony C-3/WT	35	35	35	71.7	71.7	71.7	55.701	26672000000	430	4.2795	0	-0.761889	-10.1722	2.61832	0.00200303	-0.383073	-5.0183	2.01496	0.00833291	-0.294497	-3.73657	D0CA91	Poly(A) polymerase I
26.9022	22.0777	26.8489	23.5951	22.686	25.9323	27.1876	27.0071	23.185	24.6419	26.8836	24.1462	27.5653	27.5598	24.2942	27.3416							5	5	5	43.4	43.4	43.4	15.747	2445400000	11	0.598355	0.138482	-1.83426	-1.26691	0.317611	0.33418	-0.986971	-0.750622	0.89215	0.0843765	-1.97607	-1.76397	D0CA92	ComEA protein
27.6492	27.5723	27.4562	27.7064	27.697	27.6259	27.8091	27.5802	27.2325	27.1224	27.5004	27.4352	27.7937	27.456	27.8678	27.8868					+	Colony C-3/WT	7	7	7	38.8	38.8	38.8	31.172	3862600000	64	0.651899	0.119663	-0.155025	-1.35938	0.268553	0.389182	-0.0730357	-0.651563	1.73744	0.0140432	-0.428454	-3.2127	D0CA93	Protein MazG
26.0301	25.708	26.1457	24.5971	25.6546	25.5114	25.0567	25.2953	25.9745	26.0459	25.4807	25.6792	26.1368	25.9774	25.9661	26.127			+	Colony B-3/WT			2	2	2	8.9	8.9	8.9	28.369	1220900000	41	0.56629	0.150698	-0.431589	-1.2109	2.54702	0.00222543	-0.672298	-4.8548	0.939056	0.0770919	-0.256737	-1.84196	D0CA94	Oxidoreductase, short chain dehydrogenase/reductase family protein
30.4433	30.5089	30.3515	30.3479	30.6922	30.6188	30.5368	30.5192	30.4047	30.8249	30.59	30.5108	31.0419	31.2523	31.0285	30.9501	+	Colony A-3/WT	+	Colony B-3/WT	+	Colony C-3/WT	38	38	38	56.9	56.9	56.9	88.463	33670000000	486	3.89248	0	-0.655286	-8.69149	3.11827	0.000486056	-0.476485	-6.27476	2.34393	0.00378915	-0.485618	-4.40787	D0CA95	Putative GTP diphosphokinase
26.3097	25.995	26.1937	25.8972	26.081	25.9619	26.1413	26.0658	26.2172	25.7416	26.0232	26.0564	26.6094	26.2721	26.1657	25.9199							11	11	11	30.5	30.5	30.5	52.378	1435800000	66	0.361477	0.279109	-0.14289	-0.836275	0.567519	0.166246	-0.179286	-1.21305	0.638002	0.158361	-0.232188	-1.33549	D0CA96	23S rRNA (uracil(1939)-C(5))-methyltransferase RlmD
26.1632	26.4466	26.5112	26.6919	26.3399	26.4737	25.7735	26.6054	25.9496	26.6197	26.0459	26.1608	26.3121	26.8042	26.7939	26.944					+	Colony C-3/WT	10	10	10	39.9	39.9	39.9	32.688	1728600000	57	0.720068	0.0988199	-0.260313	-1.47555	0.920527	0.0695351	-0.415403	-1.81117	1.36924	0.0296649	-0.519519	-2.56306	D0CA97	DNA_pol_B_exo2 domain-containing protein
30.7442	30.7185	30.7216	30.7319	30.837	30.9997	30.9656	30.846	30.8069	30.6253	31.0008	30.9708	31.0839	30.9101	30.9976	31.0111	+	Colony A-3/WT					17	17	17	78.6	78.6	78.6	33.156	37725000000	382	3.54249	0.000354916	-0.27162	-7.51804	0.806819	0.0914737	-0.0885887	-1.62158	0.794524	0.107898	-0.149718	-1.60098	D0CA98	Cysteine synthase
28.4528	28.4414	28.6647	28.389	28.5465	28.4855	28.6337	28.5156	28.4369	28.5841	28.6569	28.537	28.4748	28.552	28.5969	28.6216							32	32	32	53.9	53.9	53.9	107.11	7352200000	321	0.492707	0.187279	-0.0743761	-1.08012	0.132911	0.60332	-0.0160203	-0.352721	0.0473593	0.848801	-0.00761843	-0.135449	D0CA99	ATPase/histidine kinase/DNA gyrase B/HSP90 domain protein
27.8924	27.8834	27.8597	27.651	27.8132	27.6283	27.6806	27.7153	28.0107	27.7659	28.0067	28.0852	27.628	27.9912	27.7891	27.8967							10	10	10	38.5	38.5	38.5	29.212	4608000000	110	0.0162583	0.930209	-0.00464487	-0.0480237	0.641931	0.137664	-0.116926	-1.34226	0.64614	0.154922	0.140859	1.34949	D0CAA0	Enoyl-CoA hydratase/isomerase family protein
28.3386	28.3265	28.0149	28.2114	28.3192	28.0453	28.1987	28.0824	28.0641	27.7969	27.9029	27.9168	28.1295	27.9996	28.31	28.2332					+	Colony C-3/WT	9	9	9	58.7	58.7	58.7	30.376	5550400000	156	0.217175	0.439968	0.0547323	0.543316	0.025081	0.902945	-0.00670815	-0.0733853	1.53786	0.021607	-0.247915	-2.85522	D0CAA1	Phosphogluconate dehydrogenase (Decarboxylating), NAD binding domain protein
30.0009	29.9639	30.0729	30.2606	29.9492	30.2412	30.1218	29.9338	30.2755	29.9544	30.1099	30.0226	30.4356	30.4619	30.4307	30.1955	+	Colony A-3/WT	+	Colony B-3/WT	+	Colony C-3/WT	13	13	13	66.5	66.5	66.5	29.948	23014000000	215	1.8273	0.00766239	-0.306366	-3.37861	1.79485	0.0108147	-0.319443	-3.31831	1.68458	0.0160544	-0.290344	-3.11662	D0CAA2	AP endonuclease, family 2
30.5089	30.572	30.2829	30.3867	30.1162	29.7479	30.2052	30.0162	30.1971	30.1981	30.6216	30.4539	29.9342	30.13	30.1229	30.291	+	Colony A-3/WT					8	8	8	60.2	60.2	60.2	14.442	24248000000	154	1.7691	0.00833274	0.318104	3.27078	0.341703	0.312915	-0.0981221	-0.797974	1.0062	0.0653536	0.248122	1.95348	D0CAA3	Ribosomal silencing factor RsfS
26.7735	27.0705	27.0656	27.1467	26.8917	27.0863	26.6406	26.548	27.4447	27.51	27.2628	27.3035	27.432	27.5319	27.3694	27.3469	+	Colony A-3/WT	+	Colony B-3/WT			8	8	8	52	52	52	30.077	2934700000	75	2.34333	0.00253461	-0.405944	-4.40659	2.55498	0.00216959	-0.628369	-4.87287	0.223337	0.48555	-0.0397577	-0.556576	D0CAA4	Oxidoreductase, short chain dehydrogenase/reductase family protein
28.1056	28.1518	28.0081	28.0214	27.8167	27.4143	27.8067	27.698	27.7777	27.508	27.7972	27.5673	28.0669	28.276	28.2556	27.8488			+	Colony B-3/WT	+	Colony C-3/WT	9	9	9	23.1	23.1	23.1	51.235	4855600000	130	0.144817	0.557818	-0.0400901	-0.380834	1.69122	0.013135	-0.427873	-3.12862	1.96321	0.00869865	-0.449278	-3.63621	D0CAA5	NAD(P) transhydrogenase subunit beta
30.7694	30.7877	30.6513	30.7124	30.4992	30.5909	30.6106	30.4172	30.2366	30.4016	30.2038	30.2818	30.9541	30.9575	31.135	31.1205	+	Colony A-3/WT	+	Colony B-3/WT	+	Colony C-3/WT	26	26	26	85.9	85.9	85.9	39.882	33272000000	490	2.74907	0.00110613	-0.311591	-5.32767	3.58991	0.000169761	-0.512268	-7.66867	4.5946	0	-0.760786	-11.5418	D0CAA6	Putative NAD(P)(+) transhydrogenase (AB-specific), alpha subunit
28.4476	28.6128	28.3311	28.5518	28.4338	28.2571	28.446	28.3361	28.4395	28.5715	28.401	28.5392	28.7766	28.6989	28.7094	28.6894	+	Colony A-3/WT	+	Colony B-3/WT	+	Colony C-3/WT	13	13	13	63.1	63.1	63.1	38.388	7466400000	158	1.93683	0.0063675	-0.232737	-3.58554	3.43873	0.000262136	-0.350327	-7.19699	2.66996	0.00253232	-0.230759	-5.13897	D0CAB0	tRNA-dihydrouridine(20/20a) synthase
27.9407	27.9474	27.8007	28.0703	28.1517	28.0922	28.2827	27.9448	28.2556	27.918	28.267	28.1415	27.9247	27.8805	27.8482	27.9549			+	Colony B-3/WT	+	Colony C-3/WT	9	9	9	55.1	55.1	55.1	27.538	5259500000	197	0.257616	0.386025	0.0377011	0.628938	1.57319	0.0167781	0.215759	2.91749	1.55564	0.0208493	0.243452	2.88651	D0CAB4	ThiF family protein
26.7689	23.7743	27.0558	26.5397	26.3847	26.5386	26.169	26.4514	26.5723	26.7192	26.3458	26.8977	26.4943	26.6711	26.7213	26.0779							6	6	6	51	51	51	17.023	1830500000	52	0.238686	0.40809	-0.456516	-0.589262	0.260012	0.398939	-0.105247	-0.633912	0.323512	0.368172	0.142581	0.762293	D0CAB5	Endoribonuclease L-PSP
33.4294	33.3147	33.426	33.5565	33.999	34.0549	33.9352	33.7864	33.9466	33.9577	33.736	33.7569	33.1959	33.2515	33.2894	33.2667	+	Colony A-3/WT	+	Colony B-3/WT	+	Colony C-3/WT	48	48	48	65.8	65.8	65.8	100.11	257150000000	1039	1.83572	0.00767128	0.180808	3.39432	4.54568	0	0.693013	11.3187	4.11714	0.000272727	0.598466	9.52574	D0CAB6	Aconitate hydratase
25.2544	24.5197	25.5209	25.4114	25.1283	25.9331	25.6388	25.6217	25.4548	25.0755	25.6353	25.4912	25.3765	25.368	25.7382	25.478							5	5	5	34.4	34.4	34.4	30.414	885980000	22	0.615953	0.131936	-0.313538	-1.29744	0.18863	0.502069	0.0903158	0.480791	0.204444	0.511497	-0.0759988	-0.515662	D0CAB7	Hydrolase, TatD family
30.493	30.4485	30.5401	30.528	30.7243	30.4328	30.6212	30.426	30.5848	30.5618	30.3915	30.4054	30.6978	30.6692	30.7493	30.6459	+	Colony A-3/WT			+	Colony C-3/WT	16	16	16	57.6	57.6	57.6	34.633	30992000000	314	3.09419	0.00050365	-0.188134	-6.20943	0.925605	0.0687995	-0.139462	-1.81961	1.99192	0.00867087	-0.20467	-3.69174	D0CAB8	DUF3298 domain-containing protein
27.7789	27.7312	27.5384	27.5579	27.9331	27.5644	27.821	27.7622	27.3624	27.852	27.6499	27.9036	27.8763	27.8537	28.366	28.0644	+	Colony A-3/WT					10	10	10	43.9	43.9	43.9	32.443	4548900000	138	1.57422	0.0136858	-0.388504	-2.91932	0.979505	0.0605309	-0.269945	-1.90914	1.05883	0.0589626	-0.348133	-2.04093	D0CAB9	Uncharacterized protein
30.43	30.424	30.3178	30.477	30.4998	30.5252	30.5211	30.3708	30.5175	30.6191	30.4909	30.5407	31.0751	31.1938	31.0305	31.1734	+	Colony A-3/WT	+	Colony B-3/WT	+	Colony C-3/WT	26	26	26	53.3	53.3	53.3	60.761	33361000000	345	5.02548	0	-0.705984	-13.6923	4.6791	0	-0.638949	-11.9369	4.70056	0	-0.576139	-12.0393	D0CAC0	Peptide chain release factor 3
27.2639	27.1609	27.6656	27.2446	27.6621	28.0378	28.4454	28.45	27.0809	26.9212	27.6388	27.8216	24.7216	24.7633	25.1767	24.7155	+	Colony A-3/WT	+	Colony B-3/WT	+	Colony C-3/WT	7	7	7	37.8	37.8	37.8	33.693	3137400000	68	5.3744	0	2.48947	15.7054	5.27016	0	3.30455	15.0762	4.32649	0.000317881	2.52134	10.3666	D0CAC1	Uncharacterized protein
27.0014	26.5734	26.0122	26.447	27.4168	27.8059	27.7177	27.5416	26.7525	26.6729	26.6309	26.7327	24.7358	24.3494	24.199	24.4185	+	Colony A-3/WT	+	Colony B-3/WT	+	Colony C-3/WT	6	6	6	25.1	25.1	25.1	22.716	2030800000	73	3.96252	0	2.08283	8.94437	6.28127	0	3.19482	22.3612	5.92977	0	2.27158	19.5077	D0CAC2	Transcriptional regulator, TetR family
24.7411	24.2745	24.3096	24.0708	24.3061	24.0748	24.0467	23.9193	24.3246	24.9288	24.5333	23.8868	25.0004	25.0698	24.6391	24.8528	+	Colony A-3/WT	+	Colony B-3/WT			5	5	5	10.5	10.5	10.5	77.278	441060000	25	1.72163	0.0093567	-0.541498	-3.18384	3.17961	0.000224532	-0.803808	-6.44361	1.02959	0.0624905	-0.472156	-1.99234	D0CAC4	Diguanylate cyclase (GGDEF) domain protein
34.2378	34.153	34.2649	34.2175	33.9904	34.1049	34.0597	34.2555	34.0958	34.0222	33.919	33.9323	34.2194	34.0622	34.1362	34.0852	+	Colony A-3/WT			+	Colony C-3/WT	23	23	23	73.4	73.4	73.4	36.852	357810000000	648	1.14966	0.035105	0.0925493	2.19229	0.131972	0.604628	-0.0231524	-0.350484	1.31189	0.0331399	-0.133437	-2.46534	D0CAC5	Ketol-acid reductoisomerase (NADP(+))
31.4549	31.4997	31.581	31.585	31.6871	31.6268	31.6528	31.7316	31.7174	31.5999	31.6588	31.5832	31.5439	31.7187	31.3719	31.5484							12	12	12	89	89	89	17.911	61784000000	286	0.0718892	0.742183	-0.015595	-0.200861	0.873609	0.0787313	0.128839	1.7331	0.571555	0.18777	0.0940742	1.22013	D0CAC6	Acetolactate synthase, small subunit
32.0317	31.9448	31.8478	31.9594	32.2627	32.3581	32.2532	32.2869	32.1605	32.2621	32.1473	32.1701	31.9977	32.0306	32.0034	31.9374			+	Colony B-3/WT	+	Colony C-3/WT	27	27	27	50.5	50.5	50.5	62.879	88475000000	595	0.49687	0.18476	-0.0463591	-1.08761	4.15624	0	0.297969	9.67796	2.97658	0.00147806	0.192745	5.89769	D0CAC7	Acetolactate synthase
32.8764	32.7341	32.8674	32.906	32.8496	33.0107	32.8539	32.846	33.0541	32.9879	32.9576	32.922	33.2466	33.1647	33.342	33.2619	+	Colony A-3/WT	+	Colony B-3/WT	+	Colony C-3/WT	45	45	45	66.7	66.7	66.7	98.079	165750000000	1017	3.61151	0.000377551	-0.407848	-7.73815	3.27393	0.000237363	-0.363765	-6.71015	3.00034	0.0012459	-0.273401	-5.9597	D0CAC9	Leucine--tRNA ligase
30.7879	30.6376	30.4386	30.523	30.8196	30.6391	30.709	30.6399	30.5349	30.6665	30.6243	30.78	30.684	30.5744	30.608	30.6898							14	14	14	69.2	69.2	69.2	18.89	32160000000	257	0.207803	0.453358	-0.0422773	-0.522993	0.575876	0.162626	0.0628233	1.2277	0.0762911	0.771695	0.0123825	0.212306	D0CAD0	LPS-assembly lipoprotein LptE
25.5658	25.6832	25.7516	25.3649	25.9836	25.9966	25.8092	25.6718	25.5947	25.5108	25.7317	26.1316	25.7829	26.0392	26.0752	25.9147	+	Colony A-3/WT					8	8	8	34.7	34.7	34.7	37.873	1123600000	50	1.8186	0.00793066	-0.361649	-3.36239	0.374213	0.28427	-0.0877013	-0.860695	0.664295	0.148859	-0.21081	-1.38062	D0CAD1	DNA polymerase III, delta subunit
28.4808	28.4065	28.482	28.7312	28.6306	28.6562	28.6687	28.6074	29.0696	28.8609	28.8342	28.9737	28.5778	28.7269	28.6916	28.653					+	Colony C-3/WT	20	20	20	56.7	56.7	56.7	48.203	8368100000	256	0.891589	0.064375	-0.137176	-1.76304	0.254267	0.406325	-0.0216227	-0.621966	2.30527	0.0039819	0.272257	4.32577	D0CAD2	Efflux transporter, RND family, MFP subunit
26.7899	26.8113	26.661	26.5395	26.841	26.871	26.8623	26.5868	26.8355	27.0373	26.8633	26.8307	26.7996	27.0212	26.8904	27.1844	+	Colony A-3/WT					15	15	15	38	38	38	71.248	2307200000	155	1.39712	0.0212355	-0.273479	-2.61084	0.855199	0.0823078	-0.183619	-1.70242	0.367599	0.32427	-0.0822153	-0.848038	D0CAD3	Macrolide export ATP-binding/permease protein MacB
28.3553	28.2056	28.2679	28.2202	28.3887	28.1343	28.0339	28.2294	28.5127	28.6234	28.1826	28.4212	28.1357	28.1449	28.3105	27.9632					+	Colony C-3/WT	22	22	22	62.1	62.1	62.1	54.658	6149400000	234	0.778583	0.084696	0.123664	1.57423	0.224734	0.448744	0.0579515	0.55957	1.34499	0.0309446	0.296391	2.52164	D0CAD4	Efflux transporter, outer membrane factor lipoprotein, NodT family
33.6748	33.6058	33.4975	33.4924	33.9502	33.7798	34.241	34.1629	33.8317	33.9463	33.8568	33.9741	33.8778	33.6131	33.9752	33.6893	+	Colony A-3/WT					19	19	19	67	67	67	31.03	296520000000	371	1.23977	0.0291501	-0.221241	-2.34341	0.931533	0.0681409	0.244619	1.82946	0.592589	0.17775	0.113341	1.25688	D0CAD5	Enoyl-[acyl-carrier-protein] reductase [NADH]
25.5673	25.2239	24.9631	25.3017	25.9359	26.126	25.7781	25.7499	25.7378	26.095	25.878	25.4176	26.1372	26.8579	26.7031	26.6084	+	Colony A-3/WT	+	Colony B-3/WT	+	Colony C-3/WT	3	3	3	20.6	20.6	20.6	26.319	1238300000	50	3.23511	0.000467742	-1.31264	-6.59942	2.05854	0.00594209	-0.679179	-3.82214	2.03549	0.00783441	-0.794533	-3.77675	D0CAD6	Uncharacterized protein
29.7434	29.5988	29.6397	29.5987	29.8423	29.7144	29.7509	29.7974	29.5837	29.5641	29.3599	29.7908	29.7815	29.9697	29.906	29.9164	+	Colony A-3/WT	+	Colony B-3/WT	+	Colony C-3/WT	9	9	9	47.2	47.2	47.2	18.932	17258000000	110	2.49257	0.00174252	-0.248234	-4.7323	1.28032	0.0303353	-0.11713	-2.41184	1.78427	0.0128978	-0.318747	-3.29875	D0CAD7	Oligoribonuclease
28.369	28.2587	28.3869	28.2573	28.5048	28.4133	28.5311	28.5326	28.4087	28.3684	28.4277	28.6877	28.5099	28.3443	28.5636	28.7966	+	Colony A-3/WT					11	11	11	42.3	42.3	42.3	39.559	7266600000	155	1.25078	0.0287203	-0.235626	-2.36196	0.241509	0.423583	-0.0581083	-0.595222	0.282213	0.411512	-0.0804262	-0.67953	D0CAD8	Small ribosomal subunit biogenesis GTPase RsgA
30.0422	30.1528	30.0044	30.0497	30.2919	30.1585	30.5044	30.4193	30.2469	30.164	30.4081	30.2367	30.2896	30.3754	30.392	30.3187	+	Colony A-3/WT					8	8	8	57.2	57.2	57.2	15.278	24784000000	174	3.3992	0.000324561	-0.281669	-7.07771	0.00184137	0.992305	-0.000438213	-0.00552731	0.680681	0.143334	-0.0799971	-1.40862	D0CAD9	Rhodanese-like protein
30.4627	30.8826	30.6456	30.7443	30.6174	30.8439	30.7625	30.8412	30.5481	30.4633	30.7622	30.6903	30.6941	30.7525	30.8052	31.003							5	5	5	71.8	71.8	71.8	9.659	33968000000	134	0.544229	0.161549	-0.129927	-1.17204	0.2226	0.451545	-0.047462	-0.554993	1.08059	0.0565862	-0.19772	-2.07714	D0CAE0	Glutaredoxin
32.6463	32.5855	32.7011	32.6555	32.3851	32.6574	32.4485	32.4915	32.3131	32.3023	32.6634	32.7931	32.7228	32.8551	32.8757	32.92	+	Colony A-3/WT	+	Colony B-3/WT	+	Colony C-3/WT	6	6	6	57.2	57.2	57.2	17.03	128100000000	220	2.16568	0.00359211	-0.196279	-4.03667	2.53607	0.00233951	-0.347781	-4.83	1.31958	0.0325818	-0.325436	-2.4784	D0CAE1	Protein-export protein SecB
31.0419	30.7382	30.9436	31.027	30.9604	30.8716	30.9467	30.9342	31.1826	31.0193	31.0465	31.0686	31.0776	31.1328	31.088	31.2731	+	Colony A-3/WT	+	Colony B-3/WT			31	31	31	69.5	69.5	69.5	52.799	42173000000	505	1.31304	0.0248165	-0.205213	-2.46729	2.32624	0.00374587	-0.214683	-4.3702	0.506778	0.226109	-0.0636659	-1.1054	D0CAE3	GTPase Der
32.1872	32.096	32.2762	32.1753	32.1346	32.4412	32.1495	32.2084	32.2173	32.1802	32.2354	32.366	32.1734	32.2357	32.1394	32.1331							18	18	18	61.7	61.7	61.7	41.114	94487000000	380	0.112795	0.631105	0.0132999	0.304176	0.364588	0.292367	0.0630398	0.842257	0.851628	0.0935426	0.0793247	1.69646	D0CAE4	Outer membrane protein assembly factor BamB
30.2577	30.0852	29.985	30.2412	29.2931	29.3747	29.7343	29.4077	29.6094	29.394	29.8748	29.8223	30.2263	30.1758	30.1428	30.1143			+	Colony B-3/WT	+	Colony C-3/WT	11	11	11	55.2	55.2	55.2	27.806	19199000000	189	0.121182	0.611639	-0.0225711	-0.324582	3.41617	0.000258373	-0.712404	-7.12872	2.31849	0.00395115	-0.489726	-4.35375	D0CAE5	TPR_21 domain-containing protein
31.504	31.5222	31.3894	31.6215	31.5569	31.5412	31.4096	31.4684	31.7005	31.5401	31.6557	31.7651	31.9364	32.1697	32.0221	32.0344	+	Colony A-3/WT	+	Colony B-3/WT	+	Colony C-3/WT	30	30	30	72.6	72.6	72.6	48.382	68143000000	536	3.64393	0.000390501	-0.531398	-7.84336	4.04622	0	-0.546628	-9.25506	2.84002	0.00171306	-0.375329	-5.55053	D0CAE6	Histidine--tRNA ligase
31.2623	31.186	31.2581	31.2431	31.3363	31.3562	31.3038	31.2628	31.3395	31.2761	31.2301	31.477	31.2059	31.4837	31.6044	31.4923	+	Colony A-3/WT					25	25	25	76	76	76	40.443	51656000000	461	1.28268	0.0265152	-0.209215	-2.41584	0.741224	0.107768	-0.131809	-1.51132	0.534633	0.20979	-0.115915	-1.15505	D0CAE7	4-hydroxy-3-methylbut-2-en-1-yl diphosphate synthase (flavodoxin)
30.8008	30.7591	30.5701	30.6944	30.792	30.8686	30.7348	30.7226	30.705	31.0797	30.8223	30.9588	31.2517	31.3261	31.2807	31.2161	+	Colony A-3/WT	+	Colony B-3/WT	+	Colony C-3/WT	12	12	12	74.1	74.1	74.1	28.987	39078000000	287	4.27296	0	-0.562578	-10.1455	4.69994	0	-0.489177	-12.0363	2.36611	0.00360252	-0.377195	-4.4554	D0CAE8	DUF4115 domain-containing protein
29.8731	29.9137	29.7589	29.6919	29.9403	29.8913	30.0418	29.9047	29.7945	29.78	29.9556	29.881	29.6612	29.76	29.8725	29.7861			+	Colony B-3/WT			15	15	15	62.8	62.8	62.8	30.084	18319000000	207	0.237976	0.408928	0.0394316	0.58776	1.70861	0.0125667	0.174548	3.16017	0.667823	0.147522	0.0827913	1.38666	D0CAE9	Type IV pilus biogenesis/stability protein PilW
29.224	29.1419	29.2119	29.217	29.1112	28.9122	29.0931	29.0825	29.3395	29.0965	29.3808	29.1702	29.3638	29.2371	29.2735	29.5125	+	Colony A-3/WT	+	Colony B-3/WT			14	14	14	50	50	50	45.757	11983000000	186	1.21646	0.0309198	-0.148022	-2.30421	2.08101	0.00566591	-0.296974	-3.86662	0.500778	0.229971	-0.100004	-1.09463	D0CAF0	Dual-specificity RNA methyltransferase RlmN
34.0593	34.122	34.0606	34.0145	33.792	34.0944	34.07	34.1358	34.1467	34.0686	34.1937	33.9554	34.1046	34.2741	33.8642	33.9645							9	9	9	79.7	79.7	79.7	15.462	345040000000	300	0.0466997	0.82437	0.0122519	0.13365	0.0882656	0.7048	-0.0287895	-0.243022	0.144879	0.619765	0.0392761	0.380981	D0CAF1	Nucleoside diphosphate kinase
29.1193	29.6899	29.8116	29.3188	28.8909	29.1236	29.4523	28.984	28.9913	28.9342	29.6847	28.4595	29.7928	29.4272	29.622	29.8694			+	Colony B-3/WT	+	Colony C-3/WT	3	3	3	93.9	93.9	93.9	7.6095	13350000000	86	0.461839	0.205402	-0.192936	-1.02415	1.94015	0.00744712	-0.565131	-3.59191	1.29617	0.0342449	-0.660388	-2.43867	D0CAF2	FeS assembly protein IscX
32.7692	32.6923	32.7266	32.7912	32.9106	32.9982	32.9671	32.8122	32.879	32.8779	32.8242	32.8174	32.7128	32.7676	32.7776	32.8883			+	Colony B-3/WT			47	47	47	66.7	66.7	66.7	80.792	146330000000	926	0.434454	0.221176	-0.0417566	-0.973842	1.31129	0.0283384	0.135461	2.46432	0.771264	0.113999	0.0630741	1.56193	D0CAF5	Peptidase, S41 family
30.4067	30.2443	30.2625	30.2063	30.1503	30.2525	30.125	30.1298	30.0157	29.9936	30.418	30.2452	30.3526	30.4011	30.1594	30.1284							15	15	15	66.7	66.7	66.7	36.884	23938000000	298	0.0875688	0.695769	0.0195713	0.241251	0.610836	0.14936	-0.096014	-1.28858	0.321031	0.370209	-0.0922394	-0.757392	D0CAF6	Beta-hexosaminidase
24.4035	24.4957	24.6844	24.0955	24.6556	22.5058	23.7408	24.0698	24.6329	25.1683	23.0074	25.0582	24.6767	24.3109	24.7456	24.5271							4	4	4	22.5	22.5	22.5	32.362	330420000	32	0.411407	0.236684	-0.145311	-0.930985	0.897275	0.0743542	-0.822087	-1.7725	0.0689664	0.790164	-0.0983667	-0.193214	D0CAF7	Uncharacterized protein
32.338	32.3491	32.4688	32.5282	32.7542	32.8568	32.6631	32.6112	32.7571	32.681	32.6972	32.6368	32.7205	32.8026	32.7575	32.7062	+	Colony A-3/WT					26	26	26	69.1	69.1	69.1	45.687	130330000000	572	3.15124	0.000440228	-0.325683	-6.36508	0.168959	0.533075	-0.0253696	-0.436556	0.812535	0.103271	-0.0536823	-1.63115	D0CAF9	Gamma-glutamyl phosphate reductase
32.2409	32.1114	32.1379	32.1316	32.7806	32.6507	32.7618	32.6308	32.4817	32.6237	32.4464	32.5705	31.9178	32.2712	32.0762	32.0889			+	Colony B-3/WT	+	Colony C-3/WT	35	35	35	57	57	57	60.15	108080000000	607	0.373579	0.268633	0.0669341	0.859483	3.55588	0.000282723	0.617455	7.56032	2.75183	0.0022834	0.442071	5.33433	D0CAG0	Aldehyde dehydrogenase (NAD) family protein
30.8513	30.7796	30.8141	30.7991	30.1892	30.0583	30.5537	30.2604	30.5869	30.5757	30.7543	30.7169	31.0755	31.1931	31.0413	31.1001	+	Colony A-3/WT	+	Colony B-3/WT	+	Colony C-3/WT	8	8	8	54.1	54.1	54.1	18.924	34623000000	130	3.72876	0.000286501	-0.291488	-8.12447	3.57697	0.000168865	-0.837113	-7.62733	3.68207	0.000188976	-0.444033	-7.96869	D0CAG1	Gluconokinase
28.0554	28.0573	27.7351	27.8557	27.5328	27.8258	27.3644	27.3424	27.6895	28.543	27.7436	27.813	27.8214	28.4054	28.1266	28.0761			+	Colony B-3/WT			7	7	7	14.2	14.2	14.2	47.733	4978100000	91	0.596765	0.13913	-0.181496	-1.26415	1.95033	0.00727158	-0.591017	-3.61144	0.285524	0.407264	-0.160066	-0.686263	D0CAG2	Transporter, gluconate:H+ symporter family
32.51	32.7383	32.5604	32.3152	32.1119	32.198	32.4103	32.0732	32.2834	32.1466	32.6086	32.5911	32.3458	32.3032	32.4729	32.5263			+	Colony B-3/WT			14	14	14	93.2	93.2	93.2	21.559	109060000000	371	0.543456	0.161685	0.118918	1.17067	1.23105	0.0335022	-0.213716	-2.32873	0.0124412	0.956718	-0.00465107	-0.036903	D0CAG3	KHG/KDPG aldolase
32.4999	32.3483	32.5474	32.4559	31.824	32.0977	32.3921	31.9444	32.7703	32.538	32.7163	32.8714	32.2057	32.208	32.3555	32.1946	+	Colony A-3/WT			+	Colony C-3/WT	29	29	29	58	58	58	65.622	109240000000	626	2.0873	0.00445881	0.22193	3.87912	0.659467	0.131926	-0.176408	-1.37235	3.04021	0.00130073	0.483069	6.06484	D0CAG4	Phosphogluconate dehydratase
31.2086	31.1355	31.039	31.2069	31.2469	31.221	31.2516	31.1561	31.4845	31.396	31.3389	31.534	31.3317	31.232	31.4306	31.216	+	Colony A-3/WT					20	20	20	61	61	61	45.509	50302000000	473	1.29077	0.0260349	-0.155054	-2.42952	0.757261	0.1028	-0.0836754	-1.53836	1.06404	0.0586347	0.135781	2.04959	D0CAG5	Acetate kinase
31.6096	31.6392	31.4818	31.6058	31.8211	31.9292	31.7862	31.8746	31.8762	31.96	31.7958	31.8128	31.5733	31.6935	31.7051	31.6517			+	Colony B-3/WT	+	Colony C-3/WT	37	37	37	66.8	66.8	66.8	77.059	68879000000	750	0.772554	0.0864865	-0.0718083	-1.5641	2.41243	0.00356393	0.196885	4.55563	2.29572	0.00414393	0.205267	4.30564	D0CAG6	Phosphate acetyltransferase
33.4169	33.5381	33.3515	33.53	33.4402	33.509	33.4998	33.4915	33.5953	33.4544	33.4245	33.4142	34.0438	33.8982	34.0072	33.9784	+	Colony A-3/WT	+	Colony B-3/WT	+	Colony C-3/WT	31	31	31	77.2	77.2	77.2	54.969	252300000000	820	4.11798	0	-0.522774	-9.52897	5.14782	0	-0.496759	-14.3684	4.18165	0.000282353	-0.509758	-9.77806	D0CAG7	Fumarate hydratase class I
26.5081	26.8536	26.7686	26.7853	26	25.7653	26.9254	25.9384	26.324	25.3095	26.6683	26.6014	27.1715	27.3346	27.5418	27.5298	+	Colony A-3/WT	+	Colony B-3/WT	+	Colony C-3/WT	7	7	7	56	56	56	20.831	2195600000	65	2.90766	0.000716612	-0.665506	-5.72057	2.38389	0.0037365	-1.23715	-4.49372	1.93333	0.00907246	-1.1686	-3.57885	D0CAG8	DUF2059 domain-containing protein
31.9641	32.126	31.9303	32.1595	32.262	32.4564	32.4076	32.3362	32.192	32.2444	32.0039	32.1457	32.4706	32.4917	32.5522	32.4912	+	Colony A-3/WT	+	Colony B-3/WT	+	Colony C-3/WT	20	20	20	53.8	53.8	53.8	48.082	101520000000	477	3.57359	0.000365432	-0.456438	-7.61657	1.59542	0.0162059	-0.135858	-2.95688	3.20173	0.000651685	-0.354932	-6.50536	D0CAH0	ATP-dependent Clp protease ATP-binding subunit ClpX
32.93	32.9656	32.6657	32.68	32.9631	32.9919	33.1595	32.8537	32.953	32.7723	32.8734	32.9631	33.0783	33.0981	33.134	32.7896							13	13	13	65.7	65.7	65.7	22.54	157880000000	303	0.979074	0.0513325	-0.21464	-1.90843	0.12112	0.625339	-0.0329113	-0.324432	0.723707	0.128349	-0.134521	-1.48171	D0CAH1	ATP-dependent Clp protease proteolytic subunit
35.4627	35.4386	35.4789	35.3675	35.4121	35.3218	35.2147	35.4829	35.3212	35.3301	35.3104	35.3845	35.2297	35.3317	35.4154	35.5171							40	40	40	72.5	72.5	72.5	49.666	849410000000	975	0.428999	0.224194	0.0634604	0.963743	0.0660776	0.767516	-0.0156364	-0.185618	0.236008	0.471254	-0.0369234	-0.583592	D0CAH2	Trigger factor
32.334	32.3509	32.203	32.2623	32.0614	32.2059	31.9031	31.9222	32.0544	32.3073	32.1828	32.2238	32.2136	32.3278	32.2627	32.2368			+	Colony B-3/WT			42	42	42	63.8	63.8	63.8	81.175	95014000000	909	0.267689	0.374391	0.0273361	0.649782	1.71886	0.0122593	-0.237064	-3.17881	0.544116	0.204606	-0.0681715	-1.17184	D0CAH3	TonB-dependent siderophore receptor
28.7731	28.8877	28.5505	28.751	28.4317	28.205	28.5422	28.1743	28.4986	28.2616	28.7558	28.7002	28.8957	28.7061	28.7415	28.5936			+	Colony B-3/WT			10	10	10	61.7	61.7	61.7	26.168	8175900000	108	0.0230896	0.906341	0.00635195	0.0677017	1.96723	0.00684624	-0.395917	-3.64396	0.678389	0.143766	-0.180142	-1.4047	D0CAH4	PKHD-type hydroxylase HMPREF0010_01754
31.6713	31.6769	31.7566	31.7789	31.357	31.3289	31.356	31.3014	31.4442	31.2842	31.503	31.4237	31.3836	31.3235	31.3931	31.3879	+	Colony A-3/WT					27	27	27	67.4	67.4	67.4	63.237	56122000000	543	4.45889	0	0.348878	10.9325	0.869855	0.0795284	-0.0361829	-1.72685	0.368561	0.323723	0.0417619	0.849882	D0CAH5	2-isopropylmalate synthase
28.7281	28.7118	28.4213	28.4348	28.7532	28.4654	28.556	28.5571	28.2724	28.4184	28.8512	28.6146	28.5511	28.7584	28.7979	28.5537							13	13	13	44.8	44.8	44.8	43.316	7852500000	166	0.370604	0.271032	-0.0912795	-0.853793	0.406315	0.259979	-0.082377	-0.921447	0.390023	0.306132	-0.12611	-0.890753	D0CAH6	Homoserine O-succinyltransferase
29.1076	29.2017	29.1438	29.1139	29.2475	28.9743	28.9957	28.8319	29.1022	28.8276	29.2589	29.2287	29.1665	29.1649	29.2915	29.0249							14	14	14	86.8	86.8	86.8	22.056	11033000000	173	0.129764	0.590638	-0.0202122	-0.345216	0.713529	0.11562	-0.149576	-1.46447	0.202981	0.51355	-0.0575857	-0.51246	D0CAH7	Methionine biosynthesis protein MetW
27.675	27.784	27.826	27.6614	27.3638	27.3982	27.3337	26.8794	27.4266	27.4895	27.518	27.6058	27.4135	27.2871	27.5652	27.5004	+	Colony A-3/WT					9	9	9	53.3	53.3	53.3	21.611	3628400000	99	2.18167	0.00354475	0.295052	4.06923	0.706422	0.117721	-0.197788	-1.45241	0.431071	0.275738	0.0684171	0.967584	D0CAH8	Sel1 repeat protein
28.7356	28.8859	28.5022	28.6777	29.0307	29.0676	29.2628	29.0773	29.0729	28.9626	29.0152	28.8128	29.4576	29.5506	29.6088	29.383	+	Colony A-3/WT	+	Colony B-3/WT	+	Colony C-3/WT	10	10	10	50.9	50.9	50.9	23.77	11110000000	122	3.84852	0	-0.79964	-8.536	2.78508	0.0013267	-0.390382	-5.41513	3.41915	0.000469055	-0.534124	-7.13769	D0CAH9	dITP/XTP pyrophosphatase
26.2836	26.4318	25.962	26.2196	25.9268	26.4511	26.0361	26.0554	26.338	26.2457	26.222	25.9594	26.3592	26.5274	26.2824	26.414			+	Colony B-3/WT			4	4	4	29	29	29	29.9	1504100000	67	0.763039	0.0882907	-0.171486	-1.54809	1.16183	0.0389068	-0.278391	-2.21264	1.10972	0.0527623	-0.204484	-2.12565	D0CAI6	Uncharacterized protein
29.0235	28.9185	28.9405	28.9102	28.6503	29.1787	28.9741	28.9184	29.1793	29.1735	28.8463	29.2234	29.2457	29.7215	29.4828	29.1213	+	Colony A-3/WT	+	Colony B-3/WT			4	4	4	23.2	23.2	23.2	31.401	11581000000	66	1.77805	0.00830493	-0.444632	-3.28728	1.44535	0.0209822	-0.462464	-2.69396	0.918858	0.0801275	-0.287195	-1.80839	D0CAJ7	Phosphatidylglycerol--prolipoprotein diacylglyceryl transferase
29.5471	29.44	29.334	29.4901	29.6357	29.5548	29.5974	29.4232	29.1544	29.3487	29.4101	29.3502	29.7427	29.9464	29.8267	29.7293	+	Colony A-3/WT	+	Colony B-3/WT	+	Colony C-3/WT	13	13	13	52.5	52.5	52.5	31.87	14889000000	206	2.74587	0.00110119	-0.358505	-5.31994	2.04664	0.00605778	-0.25852	-3.79868	3.24416	0.000539589	-0.495444	-6.62511	D0CAK0	Thymidylate synthase
29.2602	29.4358	29.3938	29.3595	29.2507	29.3135	29.1995	29.1278	29.2332	29.3365	29.0626	29.0697	29.0797	29.2584	29.0907	28.9656	+	Colony A-3/WT					10	10	10	59.2	59.2	59.2	18.958	11783000000	144	2.00416	0.005276	0.263751	3.71553	0.869165	0.0796387	0.124271	1.7257	0.371875	0.32077	0.0769167	0.856226	D0CAK1	Dihydrofolate reductase
25.4386	25.3567	25.2788	25.4259	25.7603	24.1722	25.9016	25.6955	25.7061	25.9653	26.1	25.6242	26.0503	25.6741	26.1435	26.0573	+	Colony A-3/WT					8	8	8	22.2	22.2	22.2	41.149	1045100000	38	2.80743	0.000886154	-0.606291	-5.46994	0.69298	0.121371	-0.598907	-1.42957	0.378537	0.314858	-0.132415	-0.868944	D0CAK2	DUF4105 domain-containing protein
31.25	31.2127	31.407	30.6749	31.0353	31.0137	31.0769	31.0491	31.1571	31.7429	31.2597	31.0029	31.6318	31.9585	31.6272	31.8496	+	Colony A-3/WT	+	Colony B-3/WT	+	Colony C-3/WT	6	6	6	55.5	55.5	55.5	19.807	51623000000	55	1.89984	0.00681102	-0.63063	-3.51505	3.88728	0.000217687	-0.723043	-8.67297	1.41993	0.0268832	-0.476142	-2.65007	D0CAK3	Peptide methionine sulfoxide reductase MsrA
27.5381	27.5549	27.985	27.2942	27.0104	27.222	27.7826	27.5177	27.6395	26.8676	27.4328	27.3617	28.2424	28.6987	28.2333	28.5638	+	Colony A-3/WT	+	Colony B-3/WT	+	Colony C-3/WT	7	7	7	41.8	41.8	41.8	14.526	4628400000	99	2.40768	0.00208889	-0.841471	-4.54529	2.66097	0.00188563	-1.05134	-5.11782	2.82647	0.00170213	-1.10911	-5.51694	D0CAK4	Transport energizing protein, ExbD/TolR family
29.124	29.2325	29.3023	29.3372	29.5058	29.4016	29.8186	29.5403	29.7324	29.8494	29.513	29.3432	29.7862	30.3933	30.1982	30.4066	+	Colony A-3/WT	+	Colony B-3/WT	+	Colony C-3/WT	6	6	6	29.1	29.1	29.1	22.055	17007000000	128	3.09995	0.000507353	-0.947048	-6.22501	1.99886	0.00657019	-0.629488	-3.70521	1.72847	0.0144447	-0.586567	-3.19632	D0CAK5	Transporter, MotA/TolQ/ExbB proton channel family protein
28.3096	28.06	28.1408	28.1687	28.427	28.1257	28.3845	28.148	28.2072	28.2641	28.4271	28.5142	28.3603	28.5415	28.7547	28.2508	+	Colony A-3/WT					13	13	13	48.2	48.2	48.2	27.542	6604900000	182	1.34254	0.0239672	-0.307059	-2.51746	0.746041	0.106243	-0.205533	-1.51945	0.417408	0.28534	-0.123665	-0.942193	D0CAK6	TonB family domain protein
30.9991	31.0815	31.3037	31.2459	31.2942	31.4569	31.0409	31.1378	31.353	31.6119	31.4521	31.3799	31.4395	31.5182	31.3293	31.4206	+	Colony A-3/WT					20	20	20	77	77	77	33.711	51897000000	469	1.80572	0.0081233	-0.269356	-3.33846	1.01123	0.0568113	-0.194451	-1.96184	0.119095	0.669891	0.0223293	0.319528	D0CAK7	Formyltetrahydrofolate deformylase
28.1377	28.3247	28.2414	28.6001	27.9638	28.7895	28.0813	28.0451	28.1519	28.3148	28.2039	28.198	28.3538	28.5211	28.6228	28.3969					+	Colony C-3/WT	8	8	8	53.5	53.5	53.5	26.976	6414500000	163	0.599539	0.138239	-0.14767	-1.26897	0.595812	0.154813	-0.253697	-1.26249	1.973	0.00864932	-0.256476	-3.6551	D0CAK8	Transcriptional regulator, TetR family
29.594	29.4182	29.4255	29.3259	29.1299	28.8332	29.0848	29.0602	29.7122	29.8482	30.0436	30.0531	29.1378	29.409	29.6928	29.2831			+	Colony B-3/WT	+	Colony C-3/WT	17	17	17	40.9	40.9	40.9	53.887	14313000000	180	0.180212	0.493907	0.0602541	0.461983	1.40012	0.0229524	-0.353647	-2.61598	2.00243	0.0085598	0.533585	3.71215	D0CAK9	Aldehyde dehydrogenase
31.6537	31.9578	31.3963	31.7337	31.7	31.2942	30.5251	32.0901	30.8395	31.9003	30.9786	31.2658	31.5117	31.4483	30.4392	31.0802	+	Colony A-3/WT					8	8	8	69.2	69.2	69.2	9.1036	55042000000	150	1.08207	0.0410113	0.565538	2.0796	0.282628	0.373078	0.282517	0.680373	0.140463	0.627545	0.126201	0.370604	D0CAL0	50S ribosomal protein L28
31.4706	31.4455	32.2456	31.7588	30.8326	30.4457	31.2058	31.1465	31.0538	30.7855	31.5001	31.4029	31.1226	31.7424	30.8436	31.9011							3	3	3	49	49	49	6.0902	54878000000	117	0.475854	0.196785	0.327699	1.04965	0.805752	0.0916395	-0.494791	-1.61979	0.303923	0.387762	-0.21684	-0.723356	D0CAL1	50S ribosomal protein L33
27.2169	27.1543	27.2394	27.3915	27.5008	27.6507	27.7184	27.484	27.4491	27.4084	27.3031	27.5501	27.5618	27.7413	28.0016	27.3092	+	Colony A-3/WT					5	5	5	10	10	10	61.614	3626200000	106	1.39617	0.0212712	-0.402977	-2.60921	0.159298	0.550468	-0.0650053	-0.414455	0.710674	0.13298	-0.225802	-1.45963	D0CAL2	TrkA N-terminal domain protein
23.7801	26.8815	26.7939	26.1415	24.7254	23.713	23.1124	23.754	23.3511	24.2559	25.6294	23.2812	27.4117	26.9905	26.8082	27.8221			+	Colony B-3/WT	+	Colony C-3/WT	4	4	4	77.2	77.2	77.2	10.274	1344300000	29	0.906676	0.0619544	-1.3589	-1.78814	3.84104	0.000206452	-3.4319	-8.50976	2.73104	0.00233002	-3.12872	-5.28425	D0CAL3	Uncharacterized protein
29.4073	29.402	29.145	29.1038	29.0841	28.9309	29.2686	29.2423	29.5069	29.1609	29.4757	29.2317	29.9244	29.5228	29.4544	29.5717	+	Colony A-3/WT	+	Colony B-3/WT			12	12	12	76.8	76.8	76.8	20.541	12982000000	212	1.42952	0.019618	-0.353788	-2.66661	2.00717	0.00661304	-0.486845	-3.72139	1.04565	0.0602313	-0.274527	-2.01901	D0CAL4	Uncharacterized protein
27.1288	27.119	27.0483	27.1284	27.178	26.8197	27.2663	26.8151	27.1345	26.3842	27.1584	27.2291	27.2373	27.4866	27.2743	27.4516	+	Colony A-3/WT	+	Colony B-3/WT			3	3	3	38.4	38.4	38.4	9.5601	2884900000	48	2.10725	0.00401268	-0.256305	-3.91892	1.36898	0.0250211	-0.342667	-2.56261	0.94674	0.0760056	-0.385887	-1.85473	D0CAL6	RRM domain-containing protein
27.3994	27.6672	27.5114	27.6302	27.73	27.4452	27.6063	27.6255	27.9052	27.7655	27.9211	27.7589	27.7575	27.6696	27.9663	27.7827	+	Colony A-3/WT	+	Colony B-3/WT			15	15	15	27.5	27.5	27.5	78.35	4272900000	116	1.49451	0.0164501	-0.241941	-2.77934	1.1799	0.0373055	-0.192233	-2.24288	0.231202	0.477695	0.0436521	0.573383	D0CAL7	DNA helicase
31.2024	31.1455	31.2023	31.263	31.497	31.4667	31.4946	31.5043	31.6402	31.5478	31.5921	31.636	31.6166	31.7445	31.7722	31.6423	+	Colony A-3/WT	+	Colony B-3/WT			51	51	51	64.8	64.8	64.8	97.806	58830000000	771	4.45511	0	-0.490605	-10.916	2.70701	0.00178616	-0.203265	-5.22676	1.06724	0.0582844	-0.0899086	-2.05493	D0CAM0	DNA topoisomerase 1
27.6651	27.3663	27.1257	27.284	27.6809	27.2651	27.6654	27.2274	27.4071	27.5054	27.7048	27.8007	27.6615	27.6935	27.6408	27.6621	+	Colony A-3/WT					4	4	4	32.9	32.9	32.9	16.644	3835900000	63	1.43427	0.0191738	-0.304207	-2.67481	0.824798	0.0872413	-0.204804	-1.65166	0.273165	0.423419	-0.0599642	-0.66104	D0CAM1	Uncharacterized protein
24.3432	24.7209	24.4304	24.3469	24.1342	24.0083	24.1399	24.0722	24.775	24.7601	24.1882	22.8377	23.9156	24.041	26.9624	24.2368							2	2	2	15.2	15.2	15.2	14.245	354310000	16	0.174154	0.503871	-0.328599	-0.448335	0.427932	0.244206	-0.700303	-0.961765	0.320314	0.371037	-0.648732	-0.755973	D0CAM2	HTH-type transcriptional activator HxlR
29.3499	29.3742	29.2732	29.3037	29.6417	29.4221	29.3006	29.2146	29.2115	29.2545	29.2947	29.3997	29.1743	29.2584	29.2616	29.3455							15	15	15	53.9	53.9	53.9	36.711	12813000000	166	0.773797	0.0860773	0.0652676	1.56618	0.652883	0.134524	0.134802	1.36107	0.227168	0.482129	0.0301304	0.564779	D0CAM3	Zinc-type alcohol dehydrogenase-like protein
24.0268	25.4815	25.1969	24.1059	23.5522	23.975	23.3489	25.1089	25.3233	24.2364	25.2696	23.3459	26.0576	25.784	25.4908	26.7799	+	Colony A-3/WT	+	Colony B-3/WT	+	Colony C-3/WT	2	2	2	38.3	38.3	38.3	9.2393	751780000	27	1.5401	0.0148182	-1.32529	-2.85915	2.25948	0.00430429	-2.03184	-4.22969	1.45931	0.0251041	-1.48429	-2.71814	D0CAM4	SlyX family protein
30.1913	29.9375	30.0409	30.048	30.1057	30.058	29.9568	29.8902	30.0803	30.2202	30.1258	30.2898	30.3251	30.456	30.5132	30.5195	+	Colony A-3/WT	+	Colony B-3/WT	+	Colony C-3/WT	28	28	28	52.8	52.8	52.8	71.484	23310000000	409	2.9334	0.000639209	-0.399037	-5.78625	3.30207	0.000239468	-0.450756	-6.79137	2.25045	0.00451799	-0.274434	-4.21089	D0CAM5	ABC transporter, ATP-binding protein
28.1449	28.1167	27.7069	27.8957	28.0524	27.9571	27.6637	27.8014	27.9334	28.0734	27.9502	28.0305	28.1159	28.4579	28.4096	28.2286	+	Colony A-3/WT	+	Colony B-3/WT	+	Colony C-3/WT	9	9	9	34.7	34.7	34.7	36.345	5340600000	161	1.38658	0.0217551	-0.336932	-2.59274	2.00433	0.0065987	-0.43435	-3.71585	1.92008	0.00919424	-0.306141	-3.55355	D0CAM7;D0C8T8	Lipid A biosynthesis lauroyltransferase
28.5874	28.8668	28.7313	28.7943	28.6813	28.5253	28.7172	28.6013	28.7289	28.5631	28.6162	28.6169	28.9364	28.7054	28.7898	28.8818			+	Colony B-3/WT	+	Colony C-3/WT	15	15	15	55.2	55.2	55.2	41.056	8418100000	233	0.484968	0.191418	-0.083406	-1.06615	1.59757	0.0160525	-0.197072	-2.96071	1.72588	0.0145895	-0.197093	-3.19159	D0CAM8	Glycosyltransferase, group 1 family protein
26.7402	26.7977	26.8653	26.9184	26.7176	26.6589	25.6892	26.6406	27.2918	26.7365	26.4546	23.9793	27.5693	27.3907	27.8927	27.6674	+	Colony A-3/WT	+	Colony B-3/WT			6	6	6	15.2	15.2	15.2	46.026	2631700000	42	3.42737	0.000330357	-0.799601	-7.16253	2.38508	0.00374637	-1.20342	-4.49629	1.06151	0.0588263	-1.51449	-2.04538	D0CAM9	Probable proton/glutamate-aspartate symporter
26.3356	26.1681	26.274	26.3528	26.4904	27.0175	26.1641	26.3767	26.619	27.1141	26.501	26.4655	26.4479	27.028	25.9374	26.6012							7	7	7	22.8	22.8	22.8	43.384	1828200000	69	0.429851	0.223684	-0.221026	-0.965323	0.00995498	0.963165	0.00856304	0.0296099	0.259595	0.440536	0.171264	0.633048	D0CAN0	Endonuclease/exonuclease/phosphatase family protein
32.5836	32.5044	32.3597	32.4394	32.6636	32.8825	32.6627	32.6558	32.7605	32.4389	32.7189	32.7507	32.8056	32.735	32.9898	32.8627	+	Colony A-3/WT					21	21	21	73.9	73.9	73.9	40.567	132790000000	572	2.71022	0.00134682	-0.376497	-5.23442	0.858372	0.0817527	-0.132111	-1.70771	0.993073	0.0671408	-0.181	-1.93168	D0CAN1	Aspartate-semialdehyde dehydrogenase
24.3415	24.1146	24.014	24.7204	24.7619	24.4268	24.6588	24.198	24.1469	25.1984	23.3314	24.1347	24.615	24.8173	24.968	24.8605	+	Colony A-3/WT	+	Colony B-3/WT			5	5	5	15.9	15.9	15.9	49.457	343430000	35	1.61294	0.0122611	-0.517582	-2.98805	1.08415	0.0469436	-0.303857	-2.08307	0.776484	0.112717	-0.612358	-1.5707	D0CAN2	Uncharacterized protein
23.9042	24.4105	25.4122	22.8532	24.5841	24.1069	21.8031	25.7633	24.4689	24.0479	23.0936	23.839	25.1424	24.5383	24.9392	24.0268							5	5	5	17.9	17.9	17.9	47.196	204140000	9	0.384737	0.258401	-0.516654	-0.880733	0.287257	0.369065	-0.597309	-0.689779	1.10101	0.0537011	-0.799327	-2.11113	D0CAN3	Uncharacterized protein
28.673	28.6019	28.6656	28.9337	28.8401	28.7891	28.7798	28.6213	29.057	29.039	28.9942	28.8188	29.5914	29.7962	29.5351	29.683	+	Colony A-3/WT	+	Colony B-3/WT	+	Colony C-3/WT	11	11	11	66.9	66.9	66.9	36.099	11258000000	150	4.24364	0	-0.932851	-10.0261	4.704	0	-0.893846	-12.0558	3.85162	0.000209607	-0.674179	-8.54686	D0CAN4	Asparaginase domain-containing protein
26.7044	26.553	26.2644	26.3407	26.6431	26.263	26.5805	26.5465	26.6845	26.8191	26.879	26.7576	27.3798	27.1969	27.0666	27.0266	+	Colony A-3/WT	+	Colony B-3/WT	+	Colony C-3/WT	7	7	7	41.1	41.1	41.1	30.364	2408500000	80	2.81236	0.000785162	-0.701843	-5.48208	2.89652	0.000827094	-0.65921	-5.69231	2.27295	0.00443338	-0.382442	-4.25784	D0CAN5	tRNA pseudouridine synthase A
30.7709	30.6782	30.6724	30.7335	30.872	30.9244	30.8877	30.99	30.9749	30.9525	31.0376	30.9615	31.184	31.0212	31.1123	31.2276	+	Colony A-3/WT	+	Colony B-3/WT	+	Colony C-3/WT	24	24	24	85.9	85.9	85.9	38.814	40101000000	348	3.78173	0.000125	-0.422523	-8.30434	2.23213	0.00453076	-0.217782	-4.17289	1.70495	0.0153742	-0.154642	-3.15351	D0CAN6	Transcriptional regulator, AraC family
30.743	30.7919	30.9574	30.9033	30.6155	30.6524	31.0971	30.6885	30.4834	30.5489	30.8942	30.4446	30.479	29.9837	30.4731	30.7753	+	Colony A-3/WT					6	6	6	78.1	78.1	78.1	8.4918	32703000000	111	1.30839	0.0250588	0.421096	2.45939	0.847181	0.0839318	0.335603	1.68904	0.369997	0.322588	0.164981	0.852632	D0CAN7	Translation initiation factor IF-1
25.7112	25.7892	25.9318	26.0611	25.6086	25.6616	26.1692	26.1087	25.9599	25.9437	25.7163	26.181	25.8866	26.3552	25.7335	23.2291							3	3	3	29.5	29.5	29.5	14.194	1148600000	18	0.347318	0.291344	0.572273	0.8089	0.350849	0.304155	0.585942	0.81575	0.402777	0.294782	0.64914	0.914805	D0CAN8	LprI domain-containing protein
25.9518	25.9581	25.7969	25.5986	26.6174	26.5743	26.4898	26.3371	26.4458	26.8103	26.8202	26.3667	26.8014	26.7872	26.5911	26.6622	+	Colony A-3/WT	+	Colony B-3/WT			5	5	5	64.1	64.1	64.1	16.226	1792000000	89	3.96963	0	-0.884102	-8.97041	1.37704	0.0245476	-0.205846	-2.5764	0.327477	0.363645	-0.0997124	-0.770108	D0CAN9	Uncharacterized protein
30.6336	30.6054	30.5804	30.504	30.6979	30.5235	30.5247	30.5805	30.6845	30.4374	30.5218	30.7168	30.971	30.9457	30.8911	30.8427	+	Colony A-3/WT	+	Colony B-3/WT	+	Colony C-3/WT	16	16	16	75.5	75.5	75.5	38.402	33175000000	302	3.78289	0.000125714	-0.331773	-8.30829	3.24221	0.000232759	-0.330972	-6.61958	2.36725	0.00360821	-0.322489	-4.45785	D0CAP0	3-isopropylmalate dehydrogenase
[truncated: 1,261 more rows]

## Sheet: Xan treated A. baumannii (wt)
LFQ intensity								Student's T-test Significant Xan_DMSO	Peptides	Razor + unique peptides	Unique peptides	Sequence coverage [%]	Unique + razor sequence coverage [%]	Unique sequence coverage [%]	Mol. weight [kDa]	Intensity	MS/MS count	-Log Student's T-test p-value Xan/DMSO	Student's T-test q-value Xan/DMSO	Student's T-test Difference Xan/DMSO	Student's T-test Test statistic Xan/DMSO	Protein IDs	Fasta headers
[truncated: 2,127 more rows]
